# Supplementary material for: The Evolutionary History of R2R3-MYB Proteins Across 50 Eukaryotes: New Insights Into Subfamily Classification and Expansion
Source: PubMed Central journal article supplement (PMC4603784; doi:10.1038/srep11037), 2015-06-05
Supplement: srep11037-s1.pdf [file srep11037-s1.pdf]

Supplementary information for

**The Evolutionary History of R2R3-MYB Proteins Across 50 Eukaryotes: New Insights into Subfamily Classification and Expansion**

Hai Du<sup>1</sup>, Zhe Liang<sup>3</sup>, Sen Zhao<sup>4,5</sup>, Ming-Ge Nan<sup>1</sup>, Lam-Son Phan Tran<sup>6</sup>, Kun Lu<sup>1</sup>, Yu-Bi Huang<sup>2\*</sup>, and Jia-Na Li<sup>1\*</sup>

<sup>1</sup>College of Agronomy and Biotechnology, Southwest University, Chongqing, 400716, China; <sup>2</sup>Key Laboratory of Biology and Genetic Improvement of Maize in Southwest Region, Maize Research Institute of Sichuan Agricultural University, Ministry of Agriculture, Chengdu Sichuan, China; <sup>3</sup>Department of Biological Sciences, National University of Singapore, 117543, Singapore; <sup>4</sup>Department of Cancer Prevention, Institute for Cancer Research, Norwegian Radium Hospital-Oslo University Hospital, Oslo, Norway; <sup>5</sup>Centre for Cancer Biomedicine, Faculty of Medicine, University of Oslo, Oslo, Norway; <sup>6</sup> Signaling Pathway Research Unit, RIKEN Center for Sustainable Resource Science, #E610 6F East Research Building, 1-7-22 Suehiro, Tsurumi, Yokohama, Kanagawa 230-0045 Japan.

\*To whom correspondence should be addressed. Email: yubihuang@sohu.com;  
ljn1950@swu.edu.cn

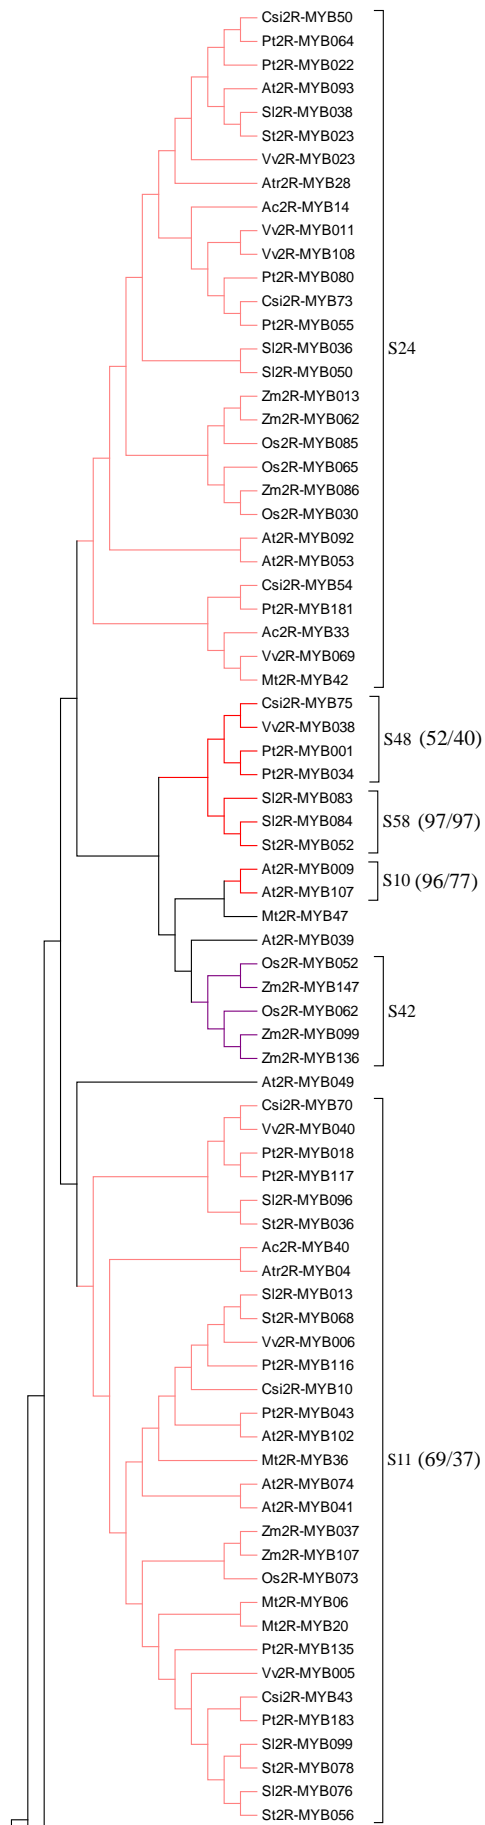

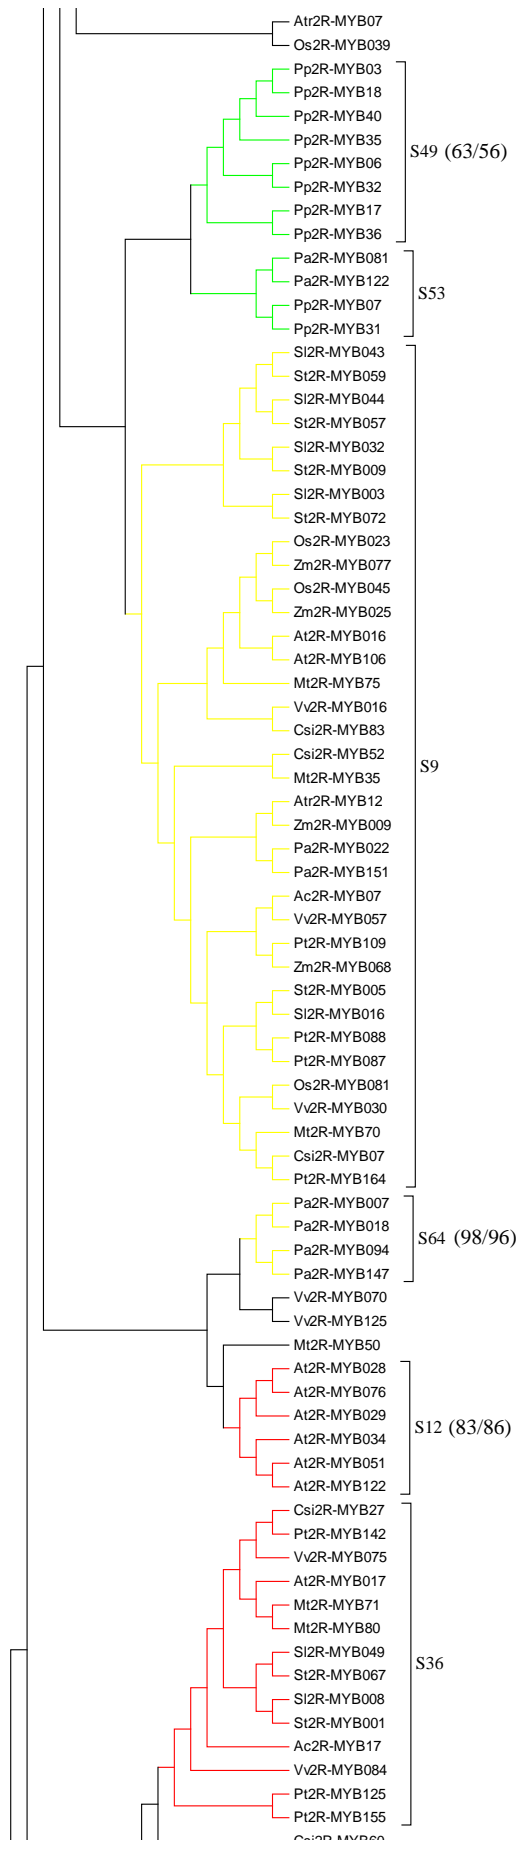

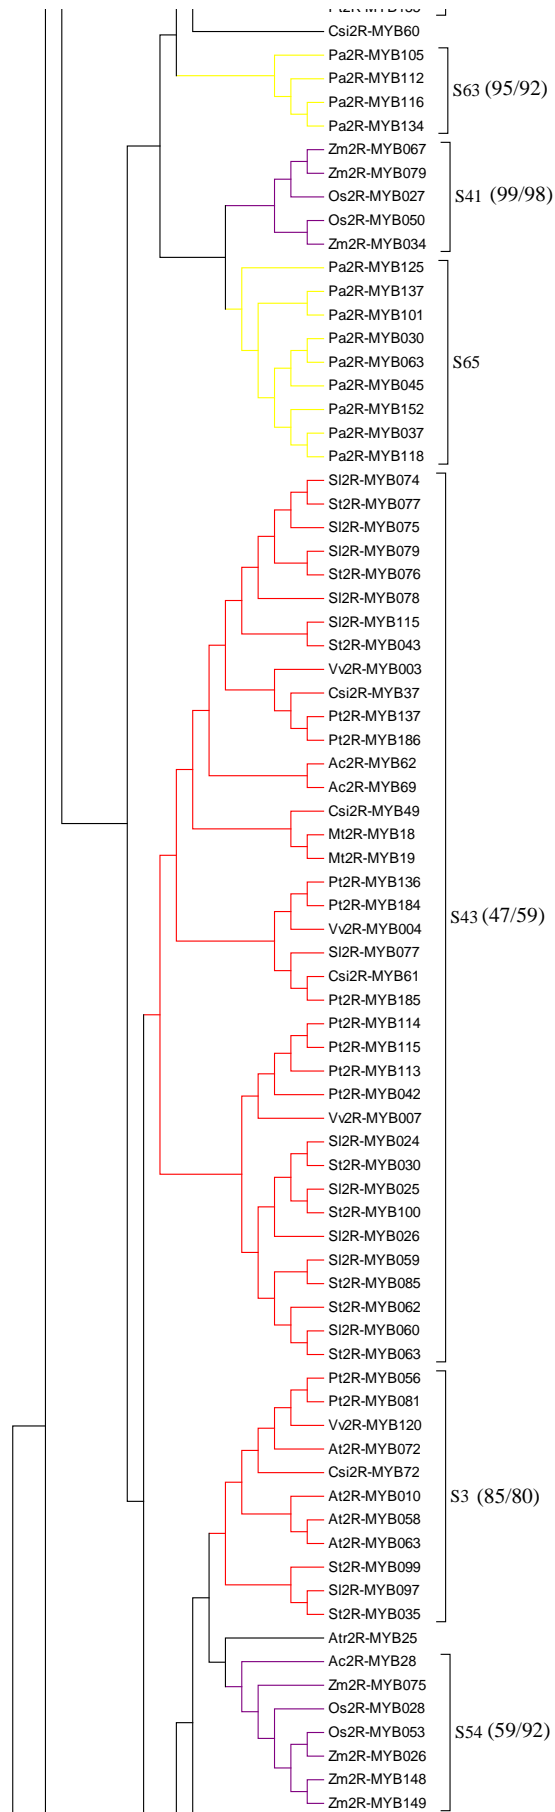

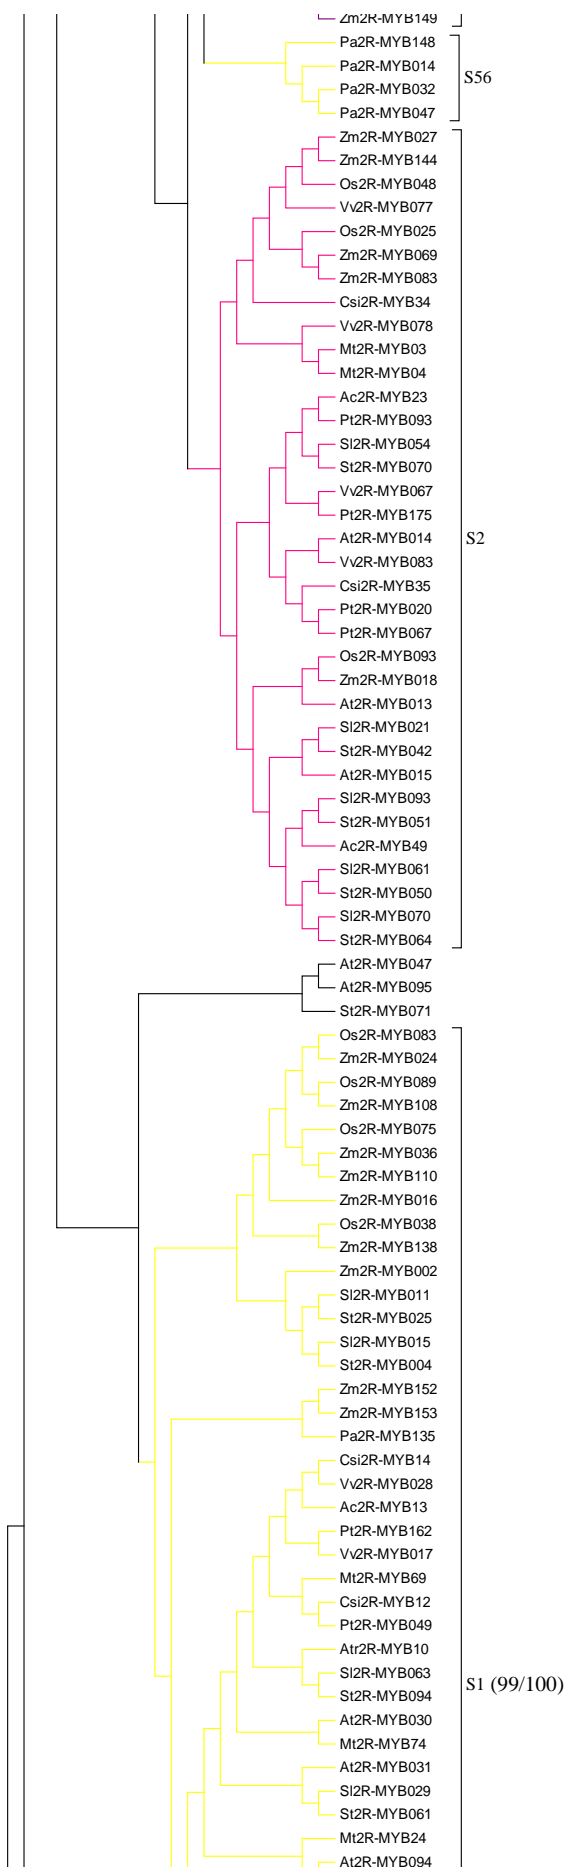

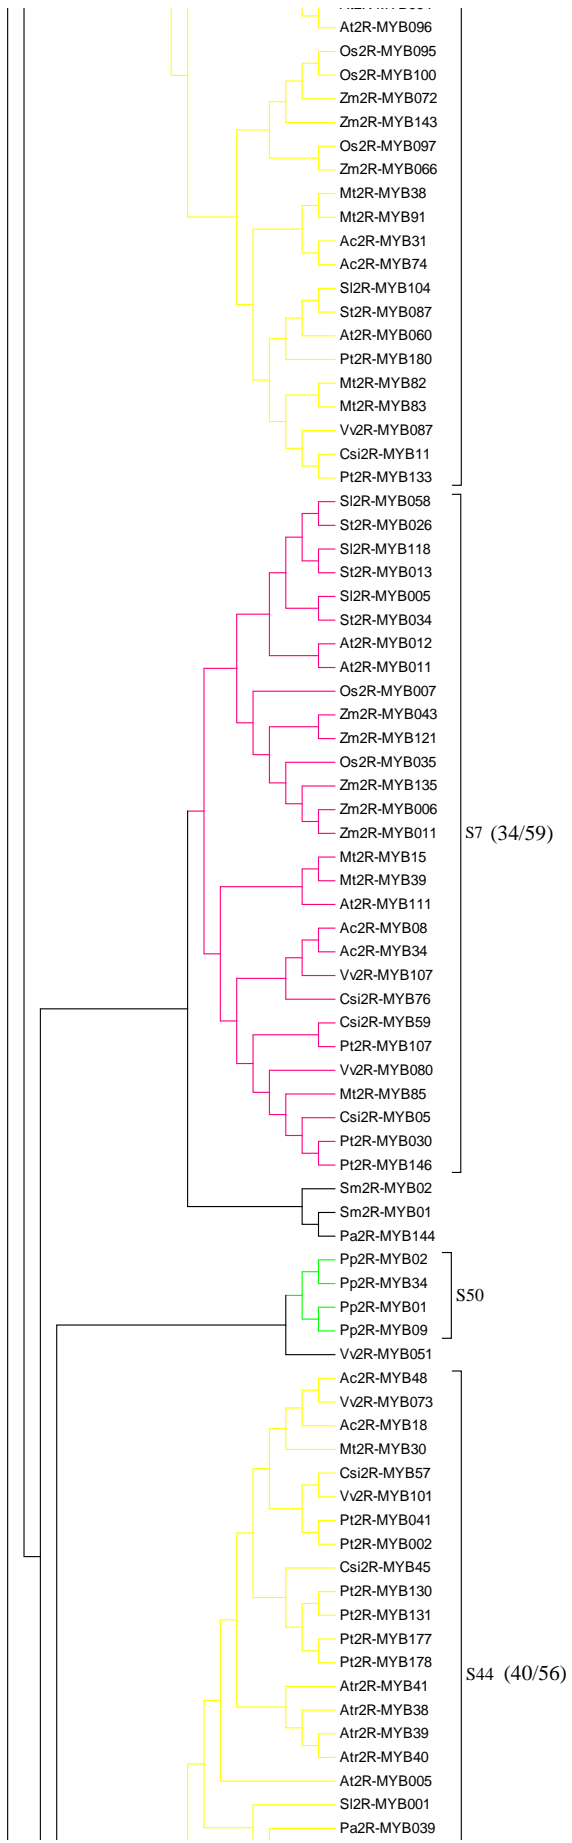

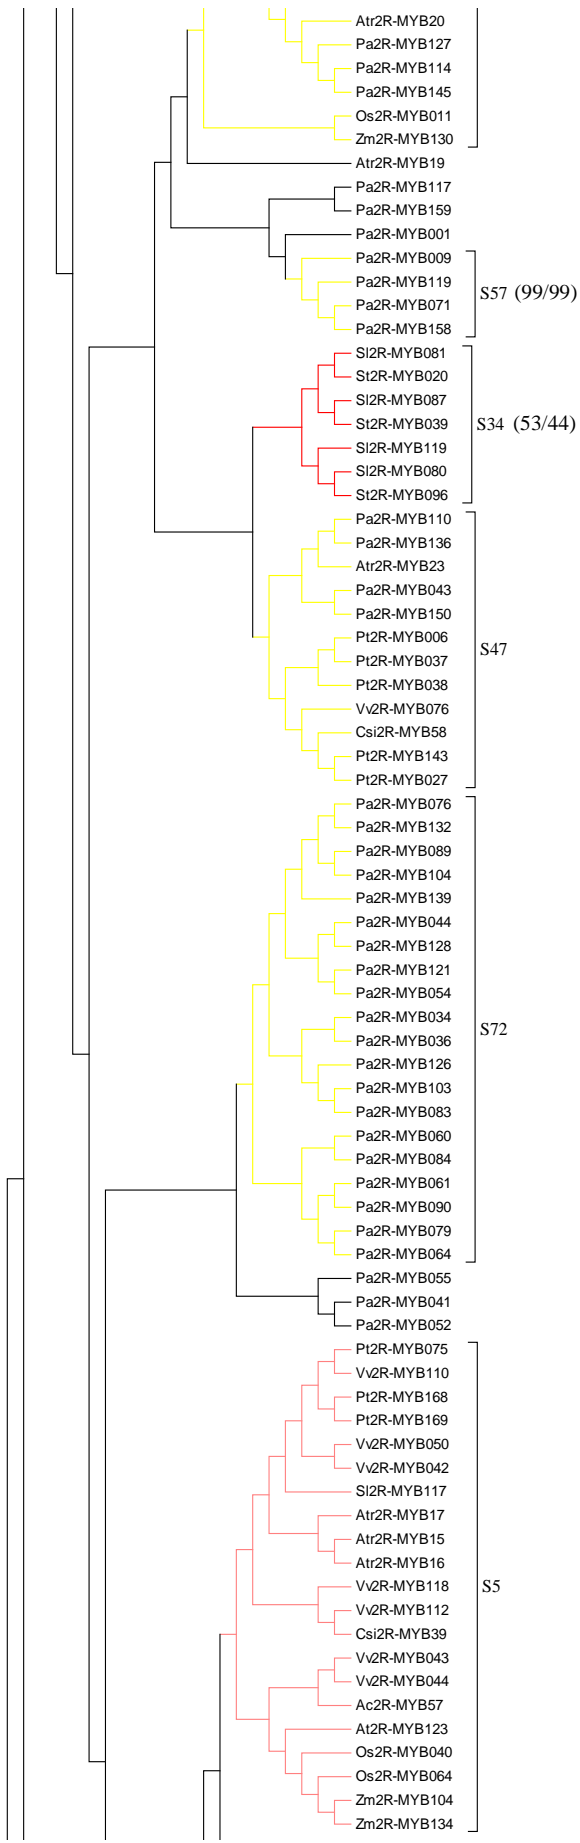

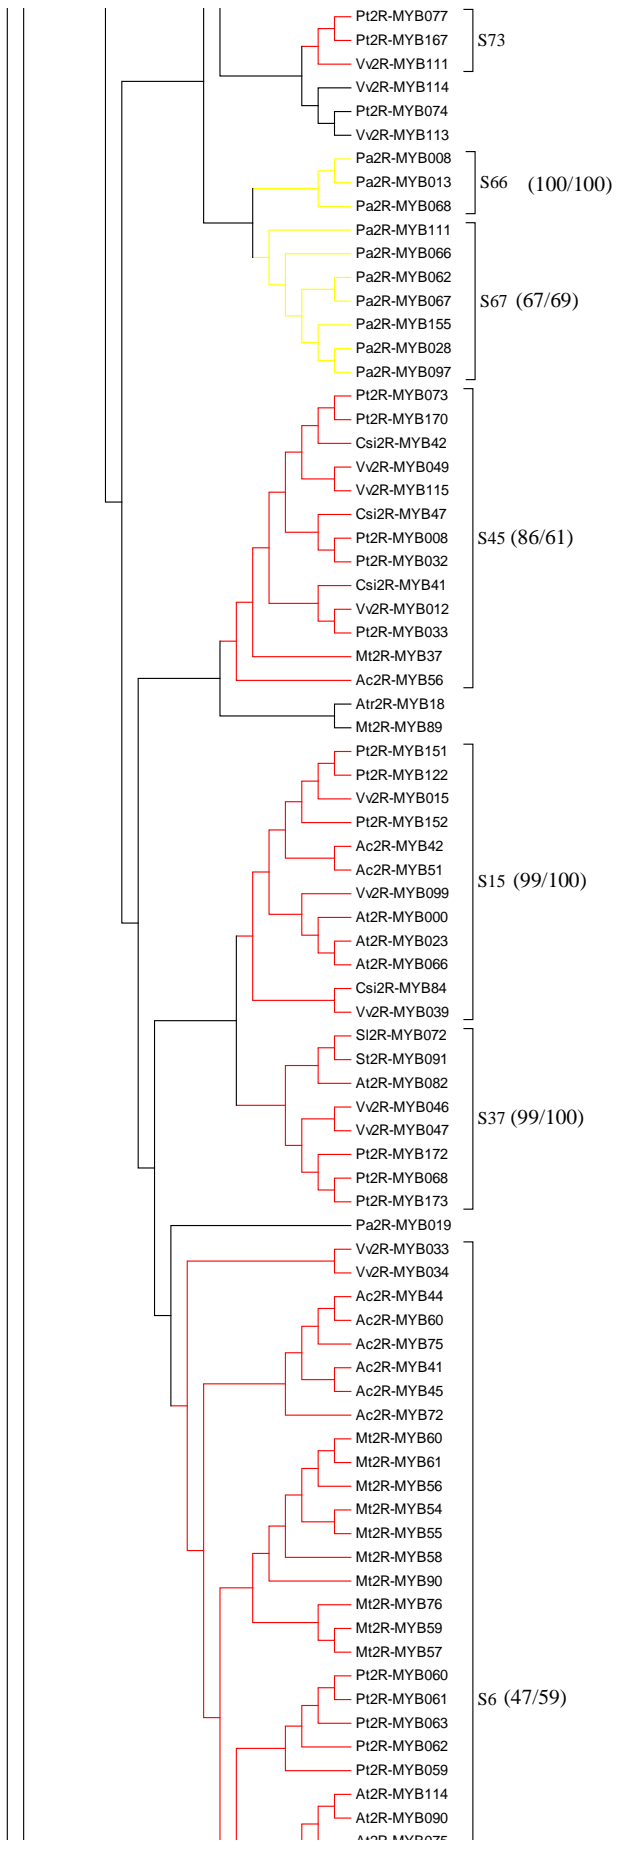



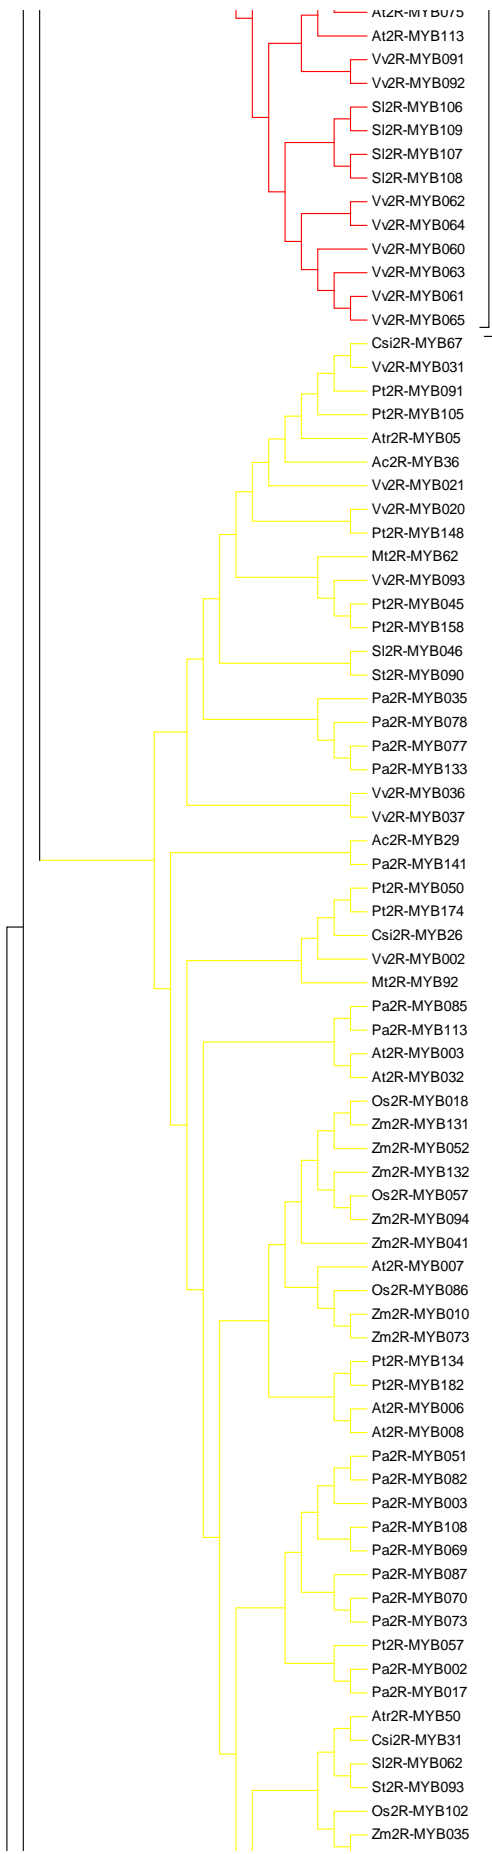

S4

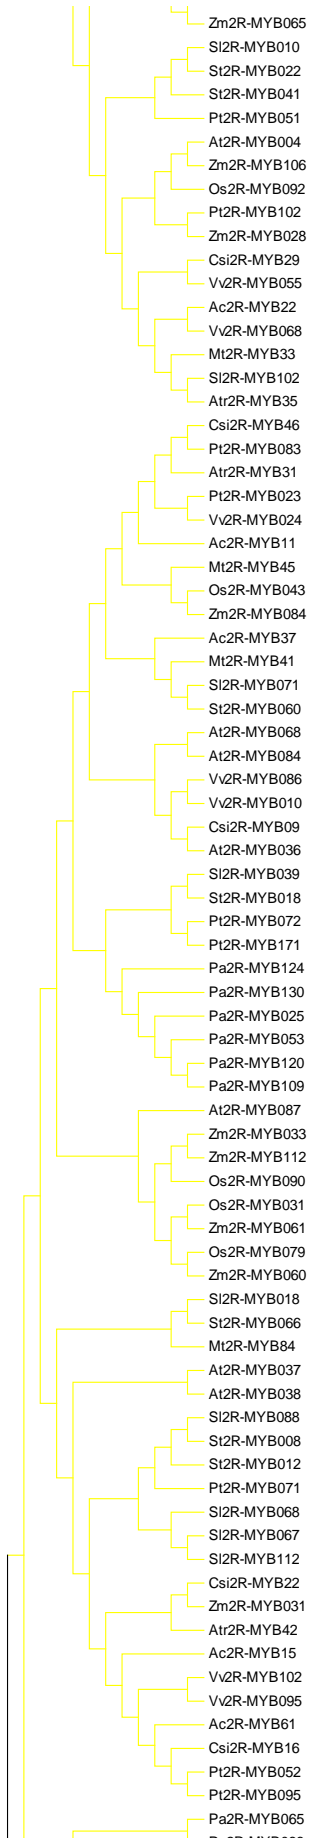

S14 (80)

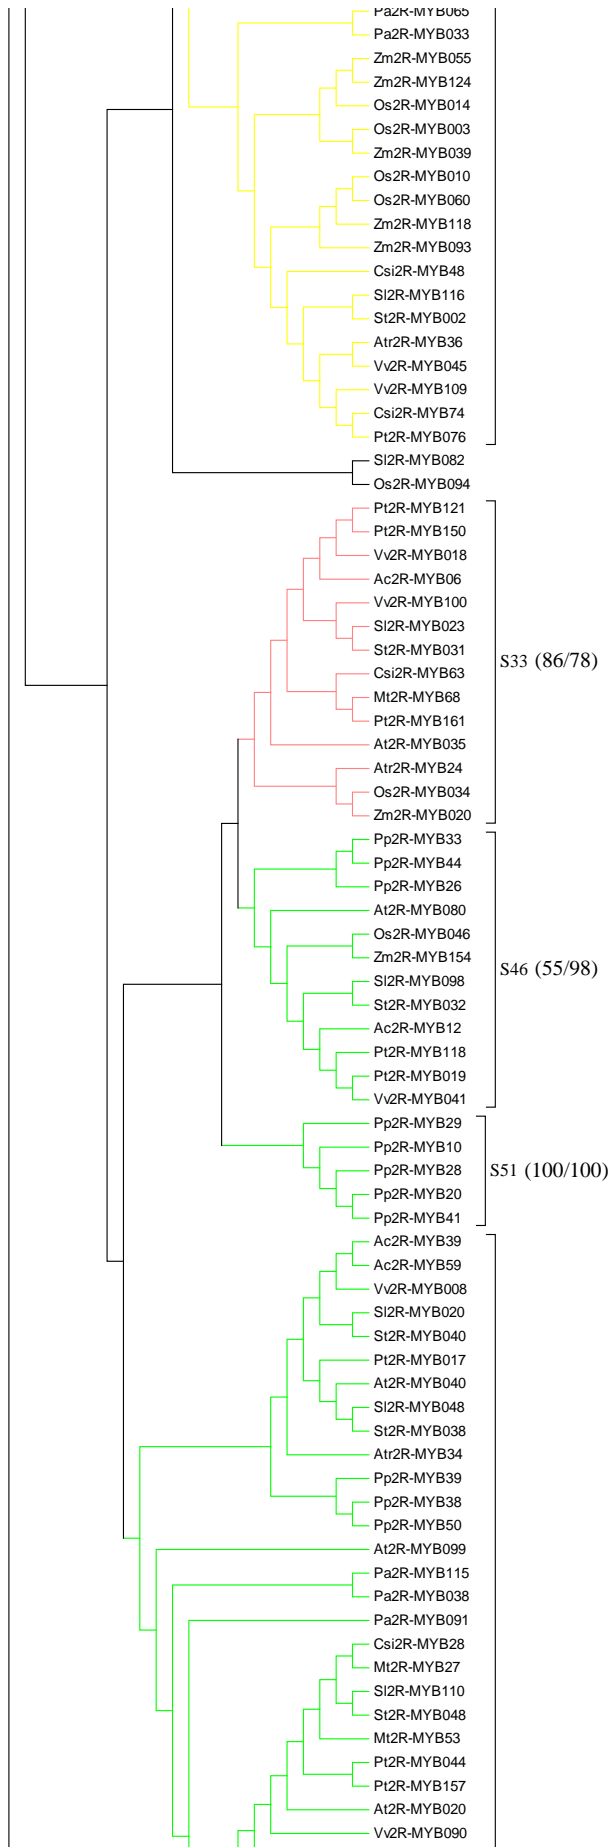

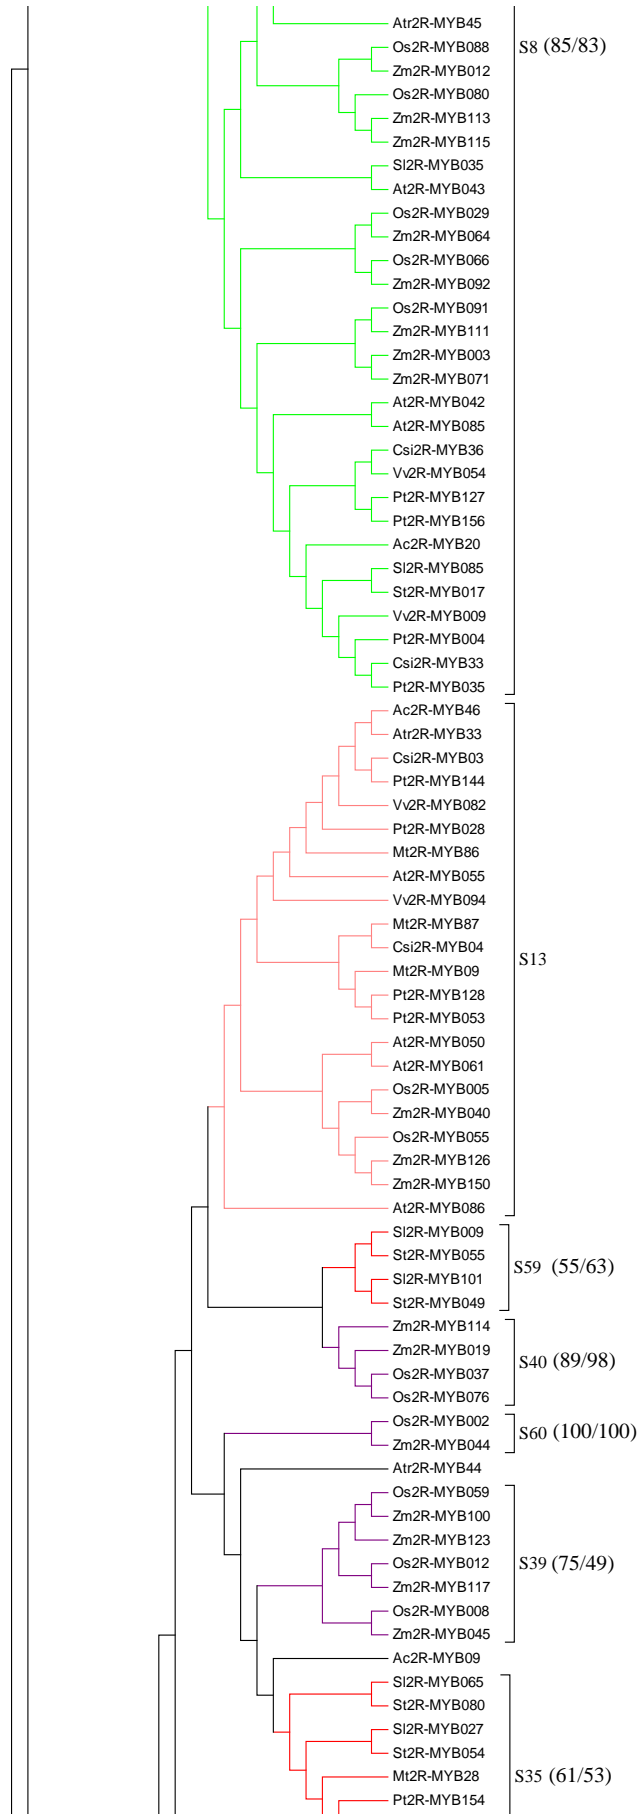

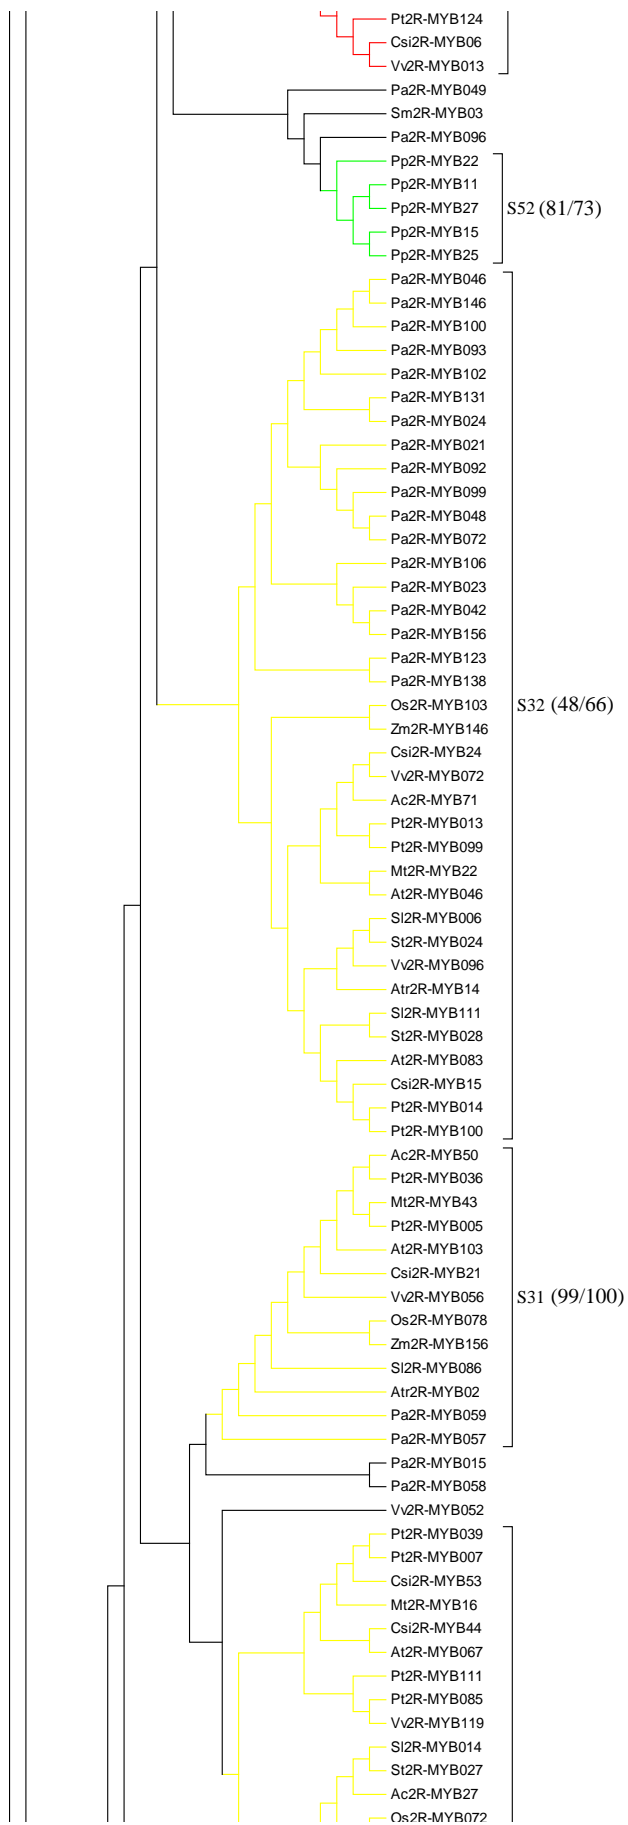

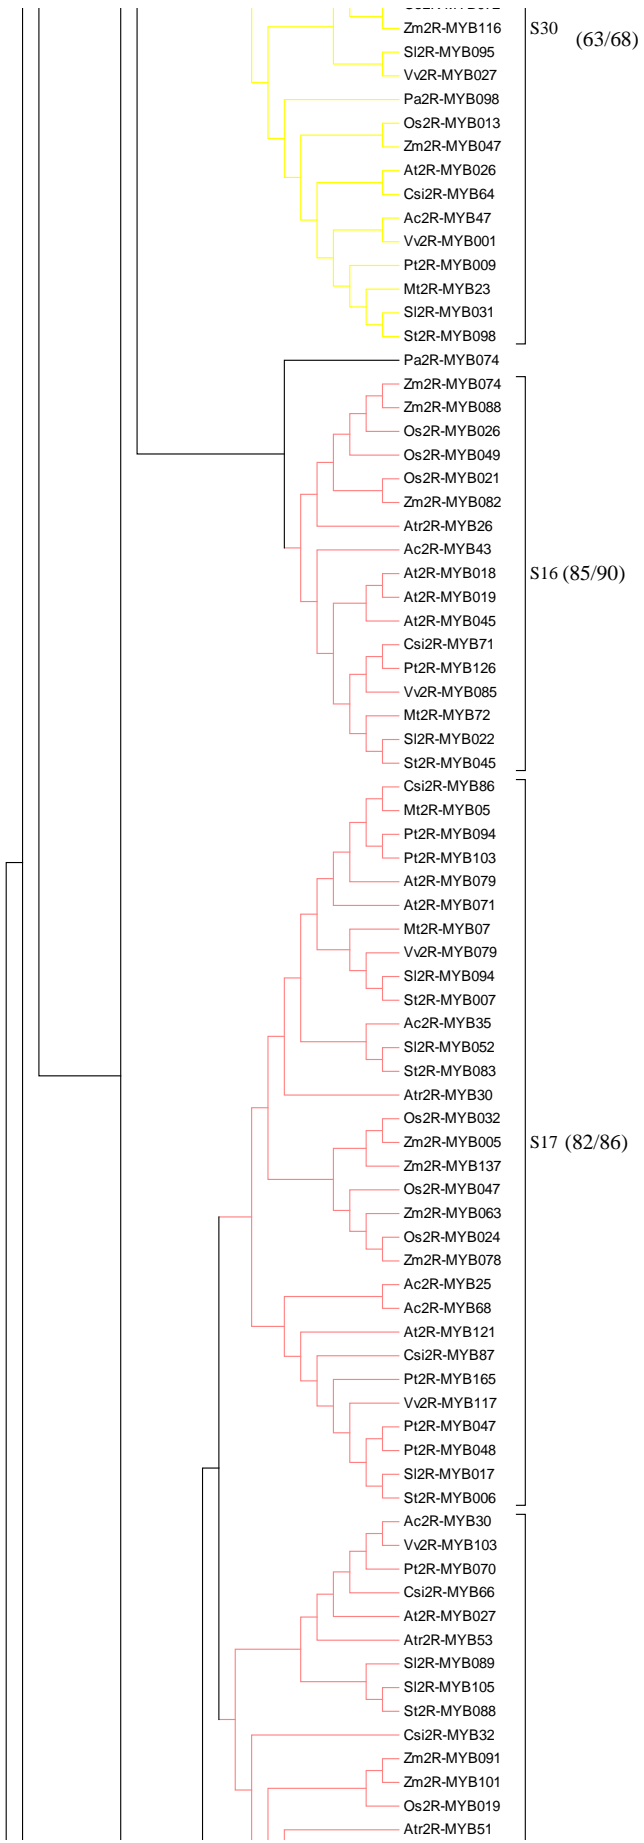

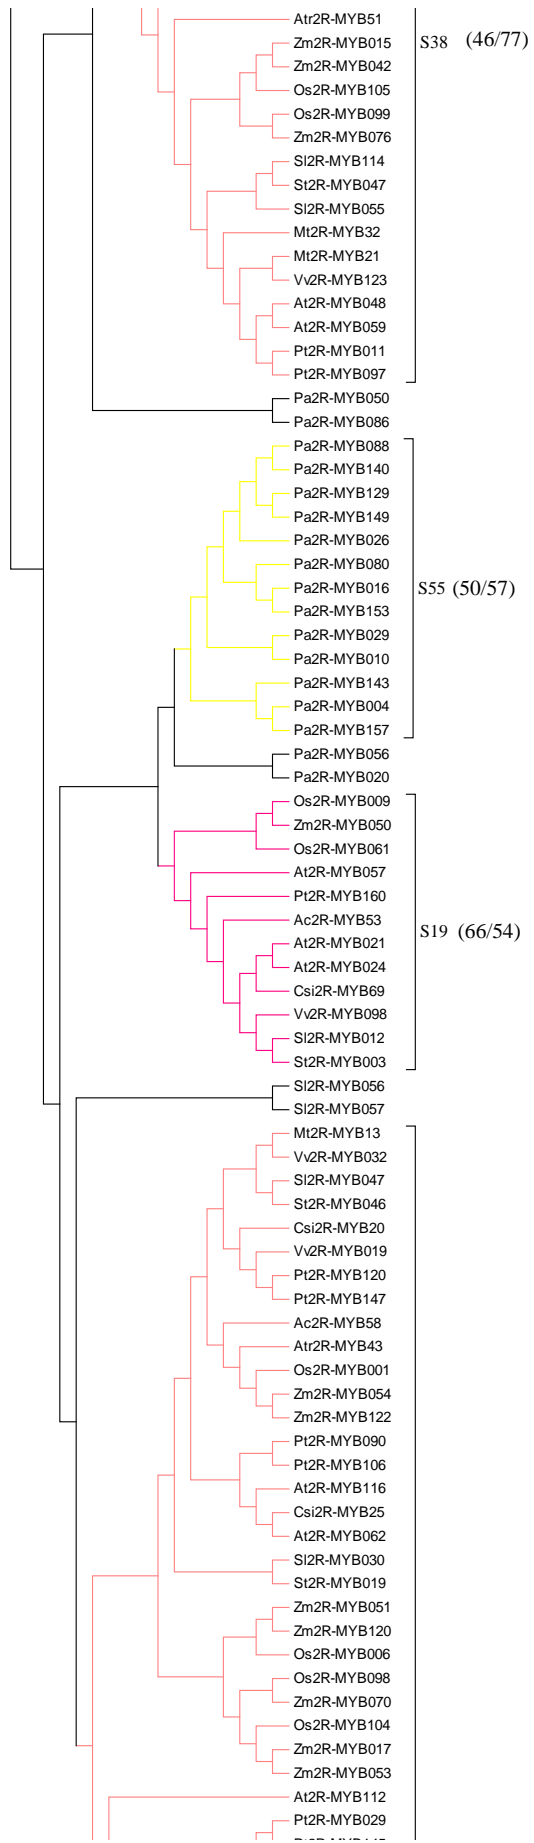

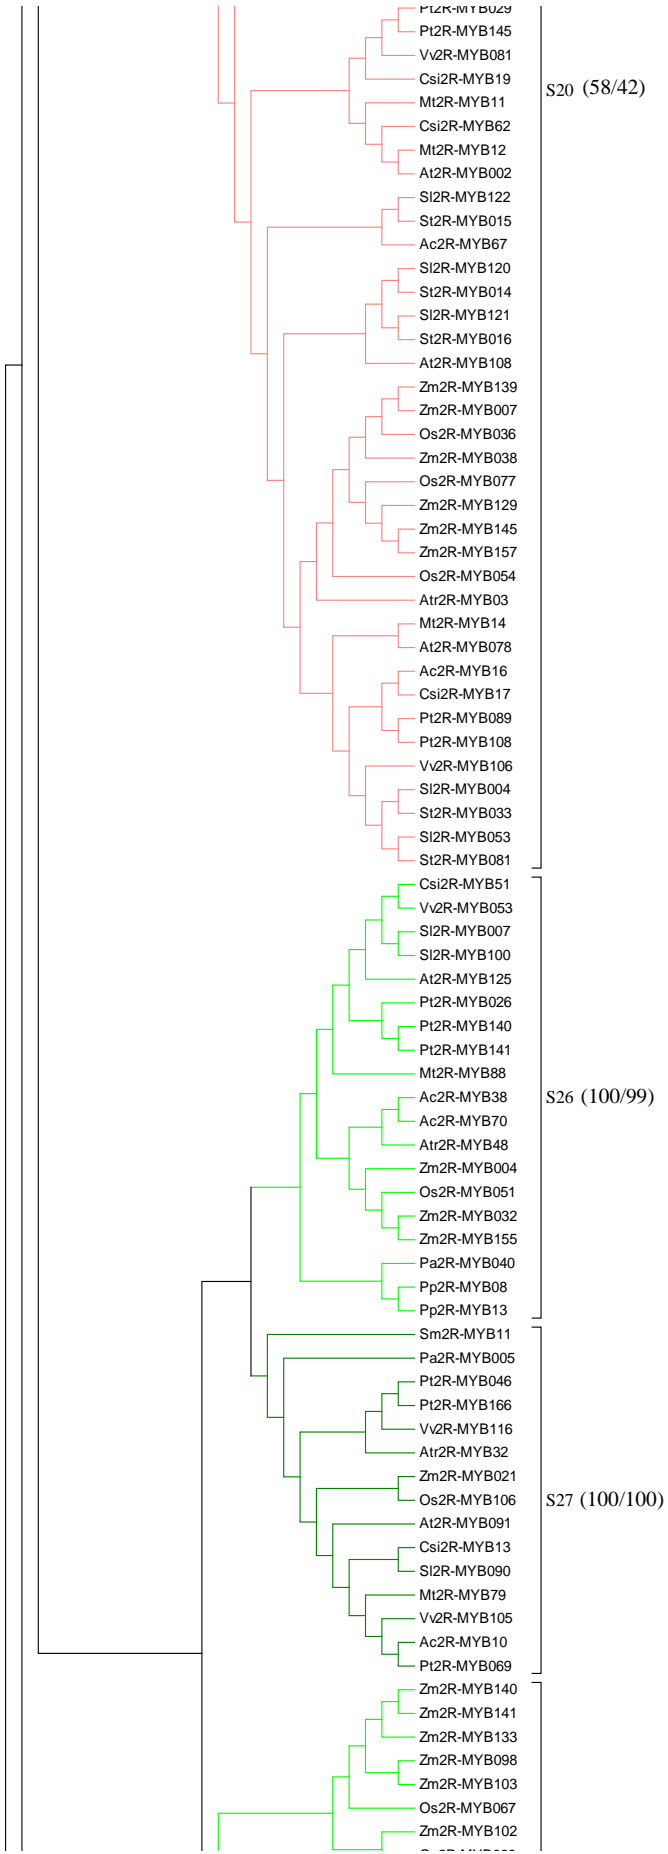



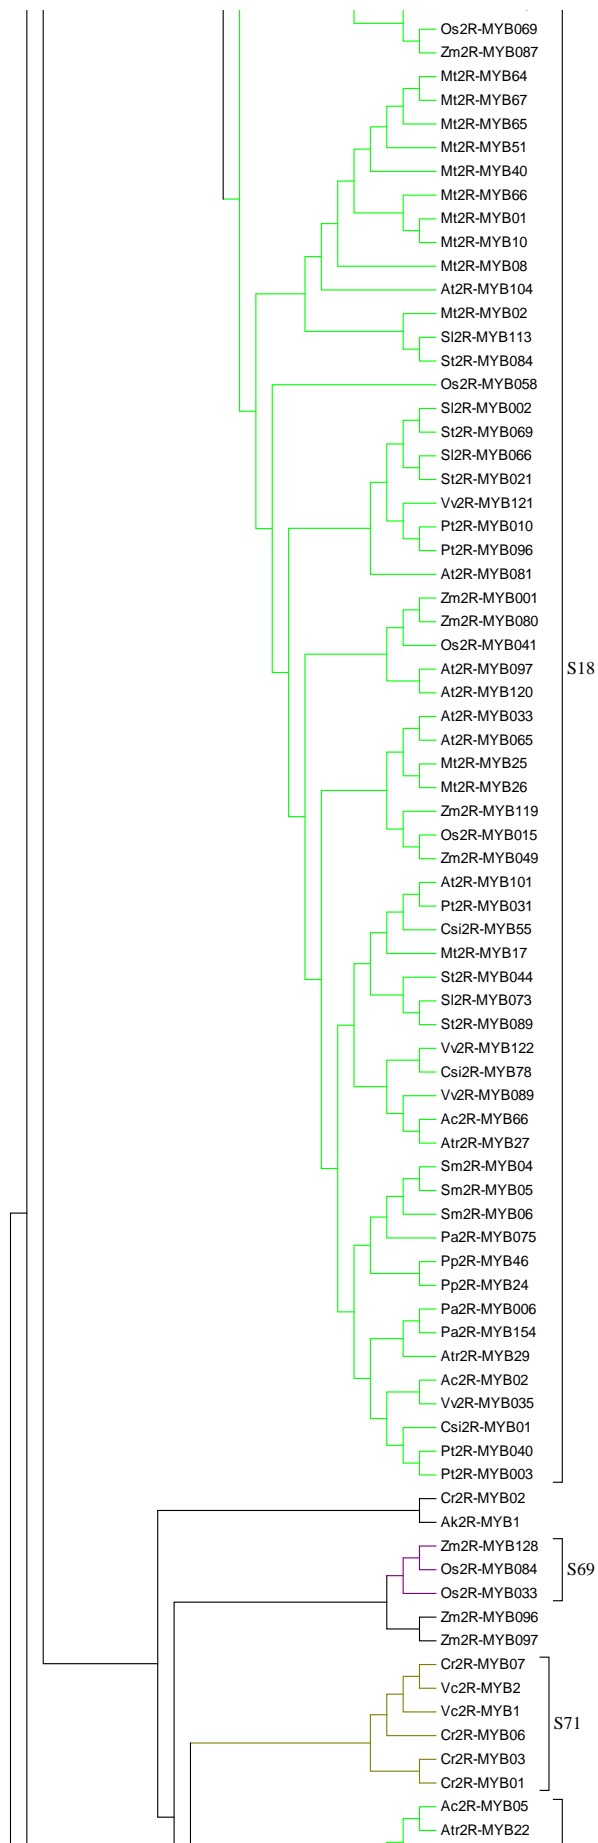

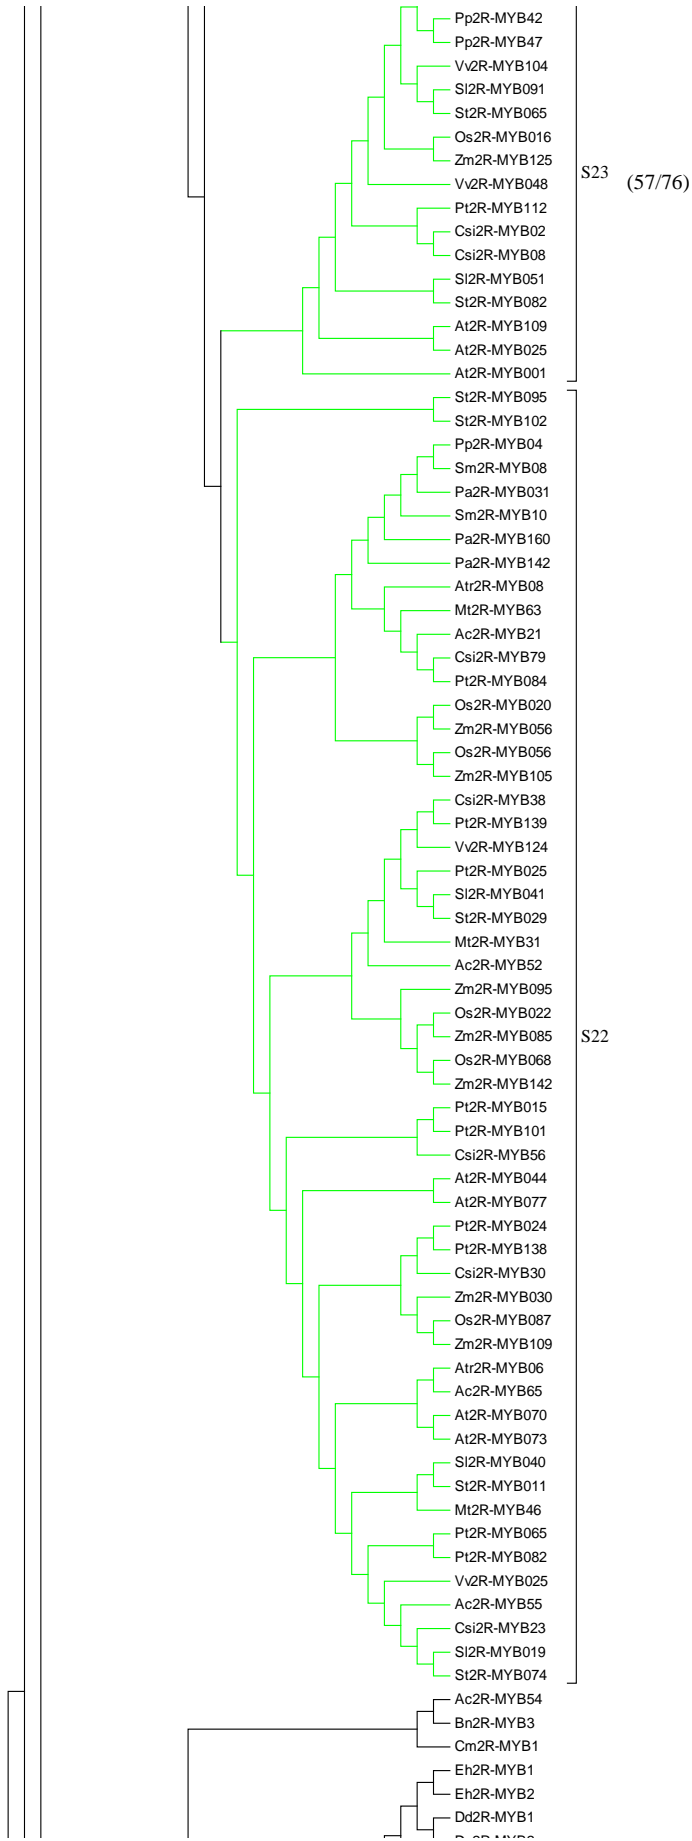

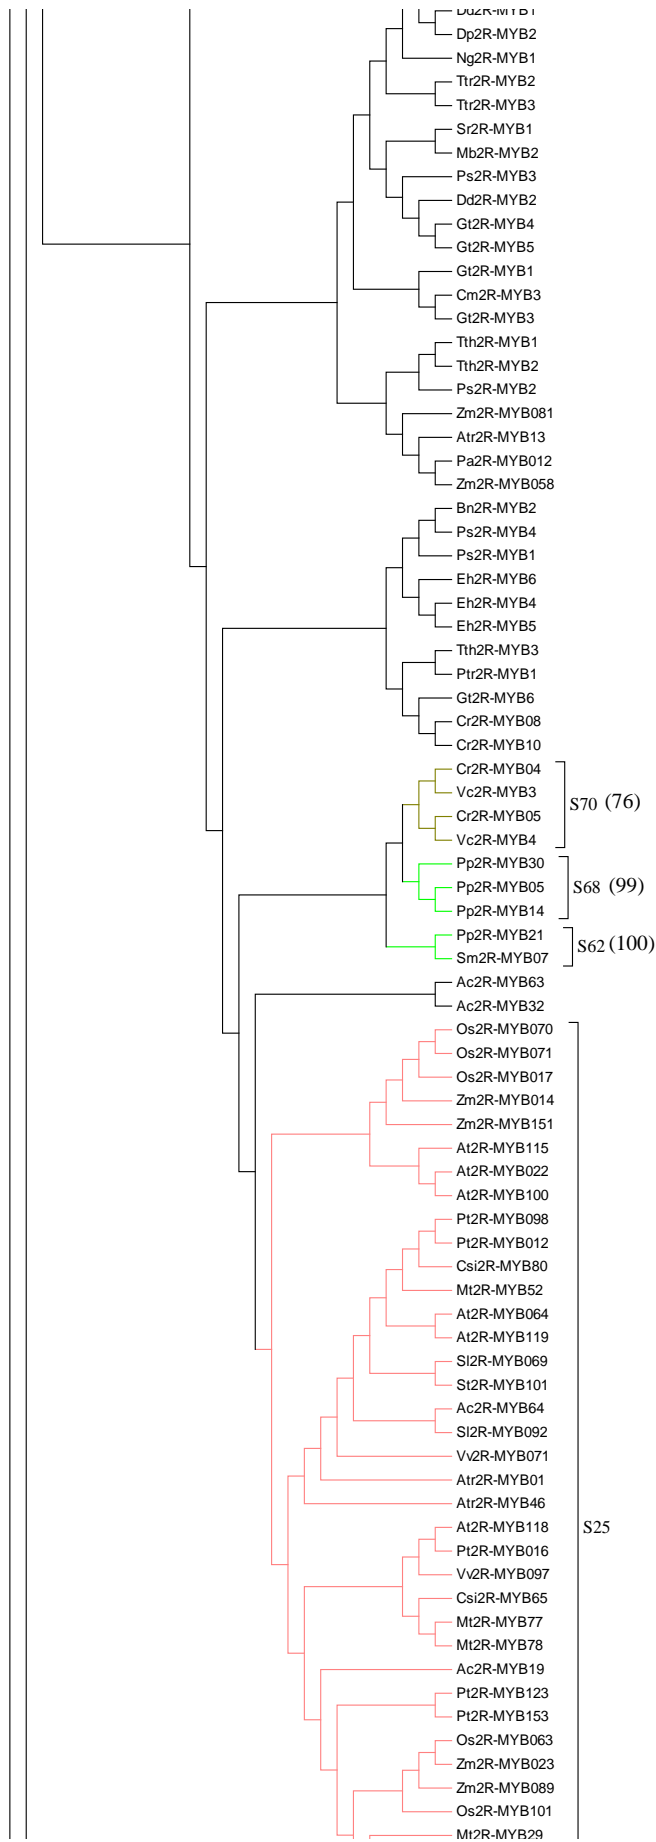

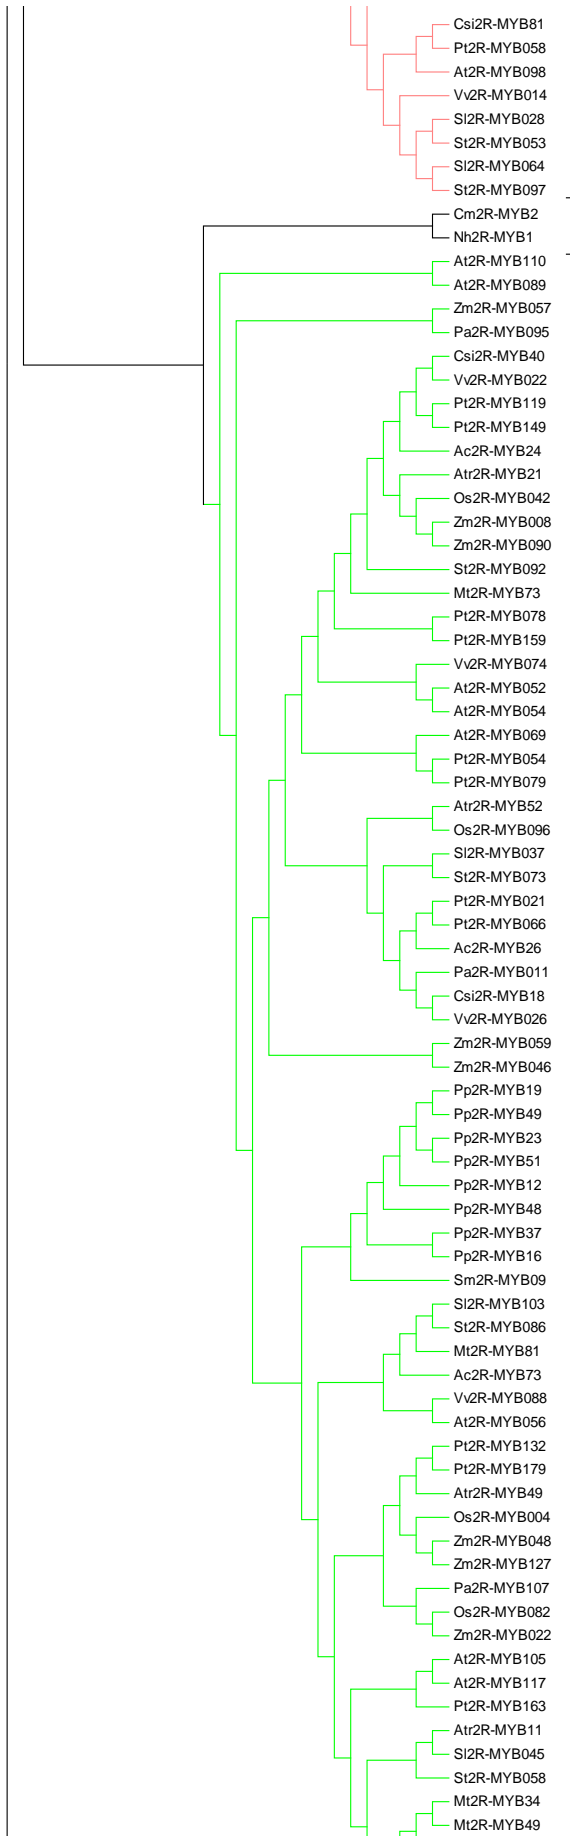

S21 (94/93)

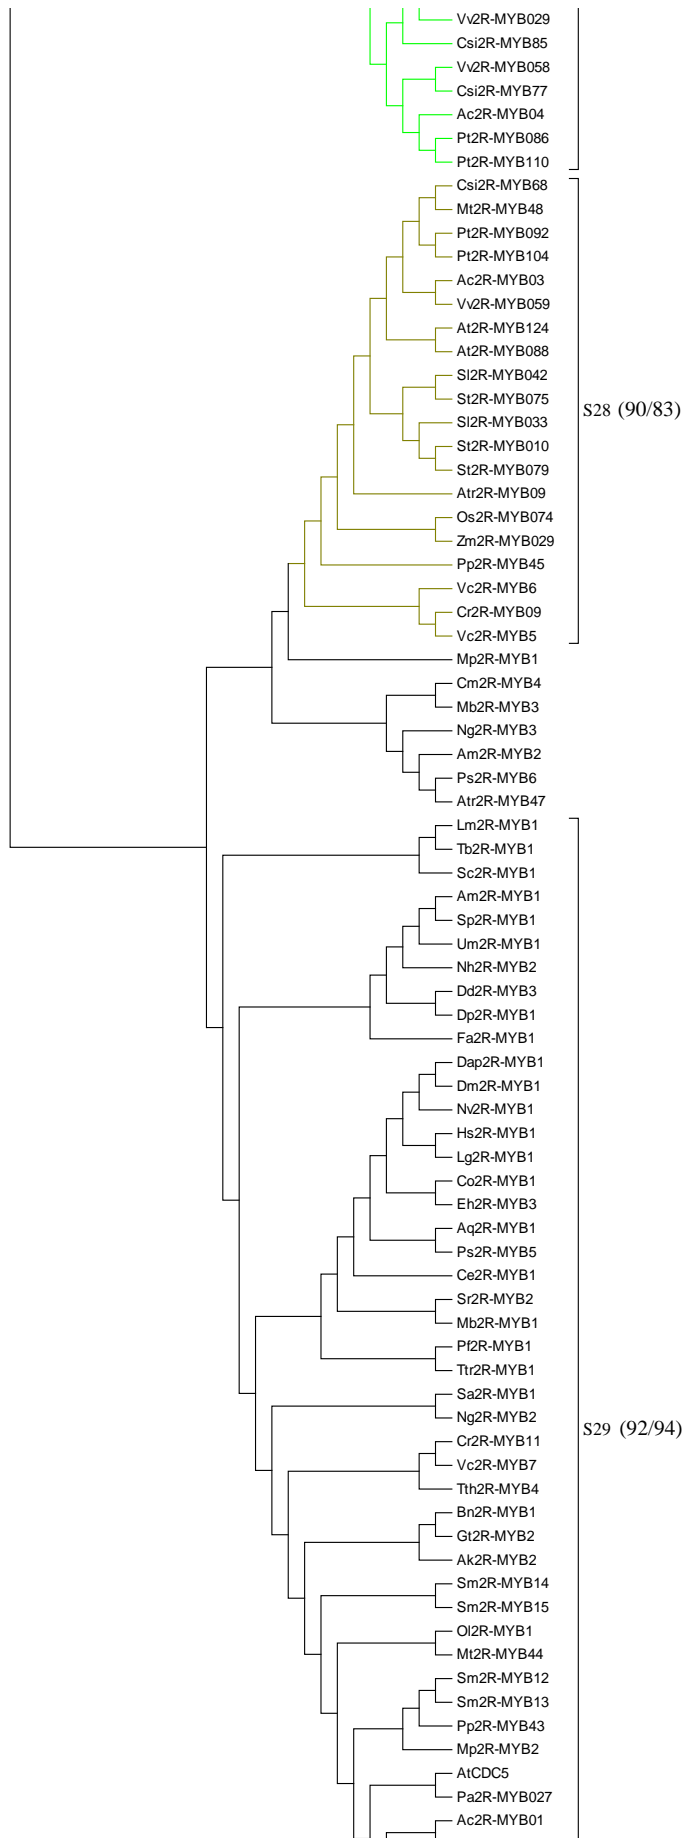

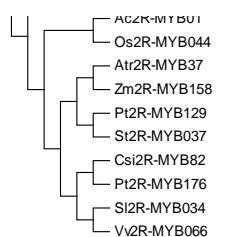

**Supplementary Figure S1. Phylogenetic tree of 1548 eukaryote 2R-MYB proteins.** The unrooted tree was constructed by the neighbor-joining (NJ) method based on the alignment of the corresponding MYB domains of the candidates listed in Supplementary Table S1. The 2R-MYB proteins are clustered into 73 subgroups (designated as S1 to S73). The first 25 subgroups were designated as previously reports of AtMYBs by Stracke et al. (2001). Bootstrap values of the corresponding subfamilies in NJ (Fig. 2) and maximum likelihood (ML) analysis are listed in round bracket (>50%), for reference, respectively.

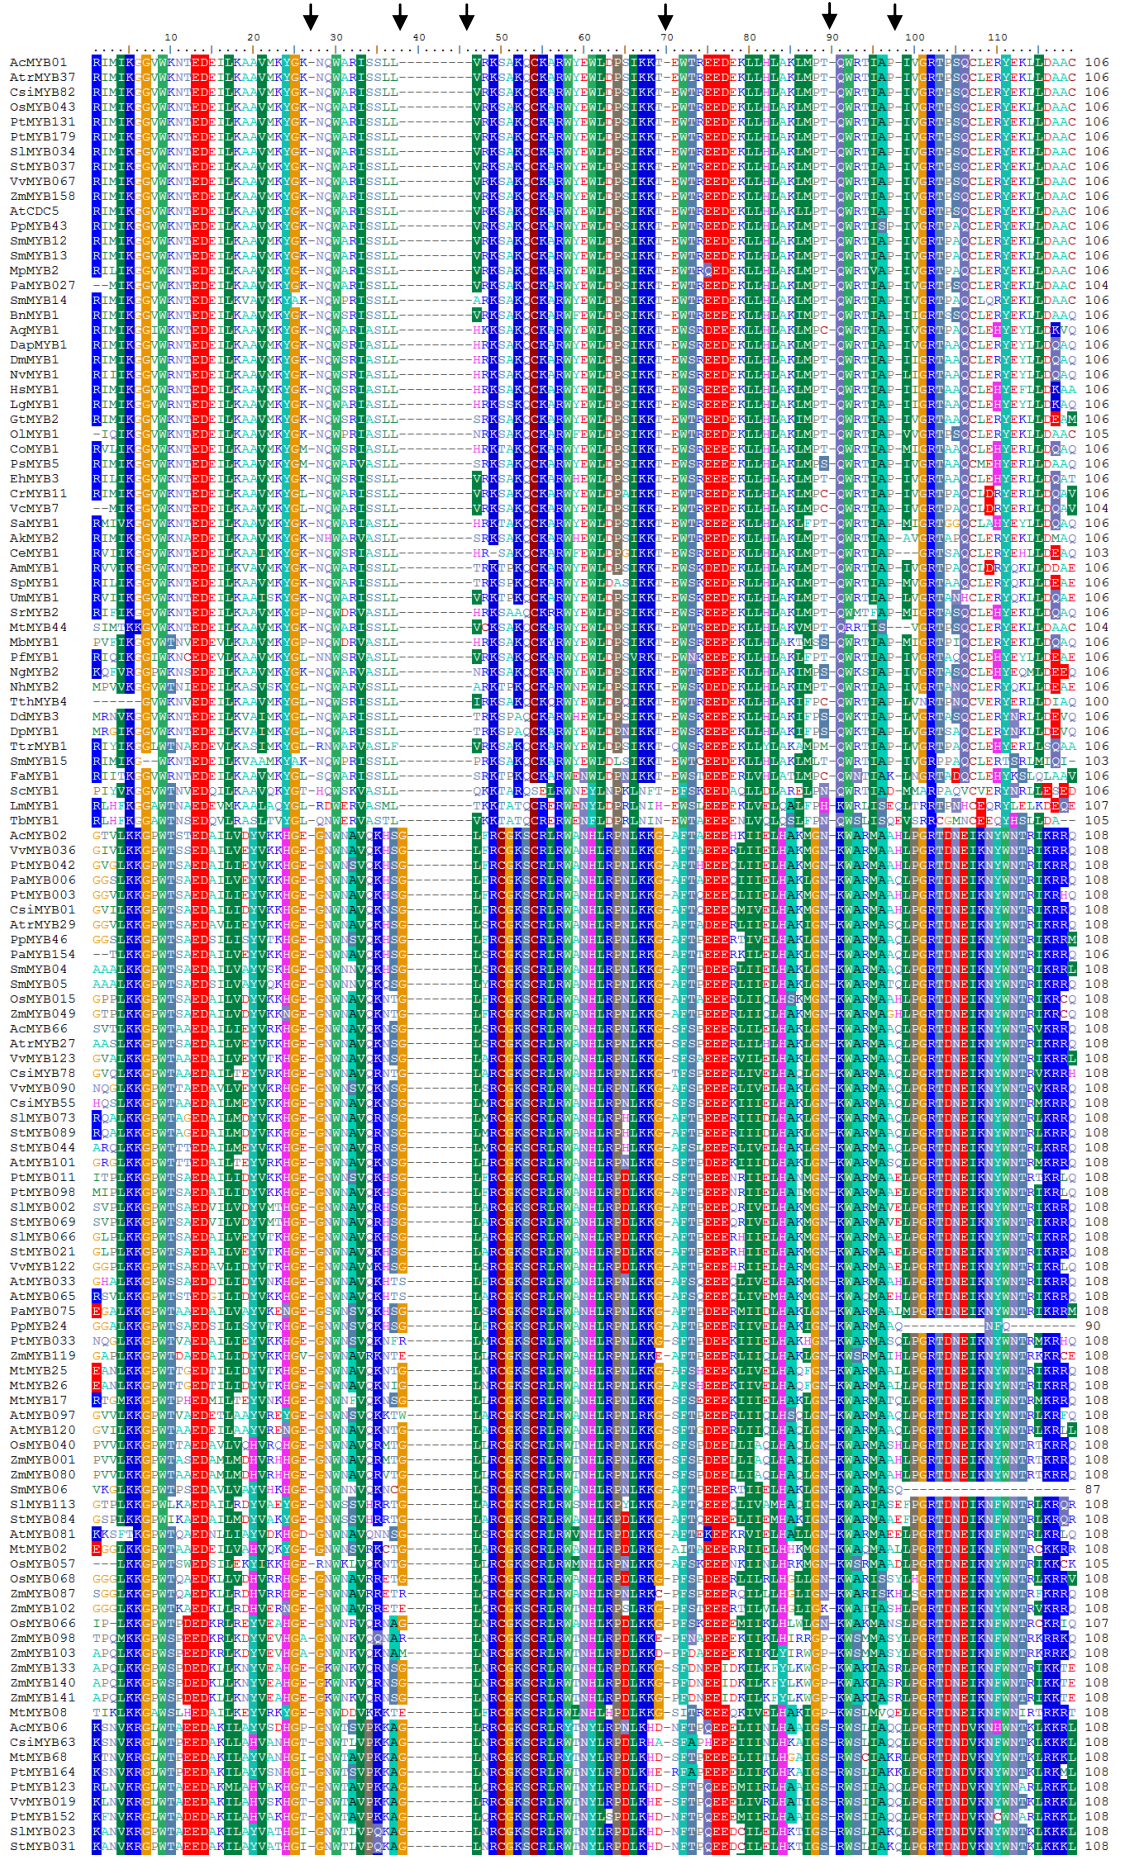







-----  
PaMYB014 KMGVKKGSWDEEDRLIVYIKNGHC-CWRRALEKKA  
PaMYB032 KMGVKKGSWDEEDRLIVYIKNGHC-CWRRALEKKA  
PaMYB047 KMGVKKGSWDEEDRLIVYIKNGHC-CWRRALEKKA  
PaMYB148 KMGVKKGSWDEEDRLIVYIKNGHC-CWRRALEKKA  
SlMYB021 KMSLKKGSWDEEDRLIVYIKNGHC-CWRRALEKKA  
StMYB042 KMSLKKGSWDEEDRLIVYIKNGHC-SWRALEKKA  
SlMYB070 KGLKKGGSWDEEDRLIVYIKNGHC-CWRRALEKKA  
SlMYB074 KGLKKGGSWDEEDRLIVYIKNGHC-CWRRALEKKA  
AcMYB28 KGLKKGGSWDEEDRLIVYIKNGHC-CWRRALEKKA  
AtMYB058 KGLKKGGSWDEEDRLIVYIKNGHC-CWRRALEKKA  
AtMYB063 KGLKKGGSWDEEDRLIVYIKNGHC-CWRRALEKKA  
CsiMYB72 KSGVKKGSWDEEDRLIVYIKNGHC-CWRRALEKKA  
PtMYB058 KQVYKKGGSWDEEDRLIVYIKNGHC-CWRRALEKKA  
PtMYB083 KQVYKKGGSWDEEDRLIVYIKNGHC-CWRRALEKKA  
VvMYB121 KQVYKKGGSWDEEDRLIVYIKNGHC-CWRRALEKKA  
SlMYB097 KSVYKKGGSWDEEDRLIVYIKNGHC-CWRRALEKKA  
SlMYB035 KSVYKKGGSWDEEDRLIVYIKNGHC-CWRRALEKKA  
StMYB099 KSVYKKGGSWDEEDRLIVYIKNGHC-CWRRALEKKA  
AtMYB072 KNRVKKGSWDEEDRLIVYIKNGHC-CWRRALEKKA  
AtMYB25 KVRGKKGGSWDEEDRLIVYIKNGHC-CWRRALEKKA  
OsMYB028 KVRGKKGGSWDEEDRLIVYIKNGHC-CWRRALEKKA  
OsMYB052 KVRGKKGGSWDEEDRLIVYIKNGHC-CWRRALEKKA  
ZmMYB026 KVRGKKGGSWDEEDRLIVYIKNGHC-CWRRALEKKA  
ZmMYB148 KVRGKKGGSWDEEDRLIVYIKNGHC-CWRRALEKKA  
ZmMYB149 KVRGKKGGSWDEEDRLIVYIKNGHC-CWRRALEKKA  
ZmMYB075 KVRGKKGGSWDEEDRLIVYIKNGHC-CWRRALEKKA  
AcMYB17 KGLKKGGSWDEEDRLIVYIKNGHC-CWRRALEKKA  
CsiMYB27 KGLKKGGSWDEEDRLIVYIKNGHC-CWRRALEKKA  
VvMYB076 KGLKKGGSWDEEDRLIVYIKNGHC-CWRRALEKKA  
PtMYB104 KGLKKGGSWDEEDRLIVYIKNGHC-CWRRALEKKA  
AtMYB017 KGLKKGGSWDEEDRLIVYIKNGHC-CWRRALEKKA  
MtMYB71 KGLKKGGSWDEEDRLIVYIKNGHC-CWRRALEKKA  
MtMYB80 KGLKKGGSWDEEDRLIVYIKNGHC-CWRRALEKKA  
SlMYB049 KGLKKGGSWDEEDRLIVYIKNGHC-CWRRALEKKA  
SlMYB067 KGLKKGGSWDEEDRLIVYIKNGHC-CWRRALEKKA  
SlMYB008 KGLKKGGSWDEEDRLIVYIKNGHC-CWRRALEKKA  
SlMYB001 KGLKKGGSWDEEDRLIVYIKNGHC-CWRRALEKKA  
VvMYB085 KGLKKGGSWDEEDRLIVYIKNGHC-CWRRALEKKA  
PaMYB030 KGLKKGGSWDEEDRLIVYIKNGHC-CWRRALEKKA  
PaMYB063 KGLKKGGSWDEEDRLIVYIKNGHC-CWRRALEKKA  
PaMYB037 KGLKKGGSWDEEDRLIVYIKNGHC-CWRRALEKKA  
PaMYB137 KGLKKGGSWDEEDRLIVYIKNGHC-CWRRALEKKA  
PaMYB118 KGLKKGGSWDEEDRLIVYIKNGHC-CWRRALEKKA  
PaMYB045 KGLKKGGSWDEEDRLIVYIKNGHC-CWRRALEKKA  
PaMYB101 KGLKKGGSWDEEDRLIVYIKNGHC-CWRRALEKKA  
OsMYB027 KGLKKGGSWDEEDRLIVYIKNGHC-CWRRALEKKA  
ZmMYB067 KGLKKGGSWDEEDRLIVYIKNGHC-CWRRALEKKA  
ZmMYB079 TRGLKKGGSWDEEDRLIVYIKNGHC-CWRRALEKKA  
OsMYB049 SKVLKKGGSWDEEDRLIVYIKNGHC-CWRRALEKKA  
ZmMYB034 SNGVKKGSWDEEDRLIVYIKNGHC-CWRRALEKKA  
OsMYB051 DAGVKKGSWDEEDRLIVYIKNGHC-CWRRALEKKA  
ZmMYB147 DAGVKKGSWDEEDRLIVYIKNGHC-CWRRALEKKA  
OsMYB061 DADVKKGSWDEEDRLIVYIKNGHC-CWRRALEKKA  
ZmMYB099 DAGVKKGSWDEEDRLIVYIKNGHC-CWRRALEKKA  
ZmMYB136 DAGVKKGSWDEEDRLIVYIKNGHC-CWRRALEKKA  
PaMYB125 KGLKKGGSWDEEDRLIVYIKNGHC-CWRRALEKKA  
PtMYB127 KQVYKKGGSWDEEDRLIVYIKNGHC-CWRRALEKKA  
PtMYB157 QGVYKKGGSWDEEDRLIVYIKNGHC-CWRRALEKKA  
PaMYB105 KMGVKKGSWDEEDRLIVYIKNGHC-CWRRALEKKA  
PaMYB112 MGVVKKGSWDEEDRLIVYIKNGHC-CWRRALEKKA  
PaMYB134 KMGVKKGSWDEEDRLIVYIKNGHC-CWRRALEKKA  
MtMYB47 KMGVKKGSWDEEDRLIVYIKNGHC-CWRRALEKKA  
OsMYB091 KMSLKKGSWDEEDRLIVYIKNGHC-CWRRALEKKA  
ZmMYB018 KMSLKKGSWDEEDRLIVYIKNGHC-CWRRALEKKA  
PtMYB178 MMGLKKGGSWDEEDRLIVYIKNGHC-CWRRALEKKA  
OsMYB038 CSSVKKGSWDEEDRLIVYIKNGHC-CWRRALEKKA  
AtMYB039 DKGVKKGSWDEEDRLIVYIKNGHC-CWRRALEKKA  
PaMYB007 HGLKKGGSWDEEDRLIVYIKNGHC-CWRRALEKKA  
PaMYB094 HGLKKGGSWDEEDRLIVYIKNGHC-CWRRALEKKA  
PaMYB147 HGLKKGGSWDEEDRLIVYIKNGHC-CWRRALEKKA  
PaMYB018 HGLKKGGSWDEEDRLIVYIKNGHC-SWRALEKKA  
SlMYB032 KGLKKGGSWDEEDRLIVYIKNGHC-CWRRALEKKA  
StMYB002 KGLKKGGSWDEEDRLIVYIKNGHC-CWRRALEKKA  
AtMYB010 KGLKKGGSWDEEDRLIVYIKNGHC-CWRRALEKKA  
AtMYB028 GEGVKKGSWDEEDRLIVYIKNGHC-CWRRALEKKA  
AtMYB076 GEGVKKGSWDEEDRLIVYIKNGHC-CWRRALEKKA  
AtMYB029 GEGVKKGSWDEEDRLIVYIKNGHC-CWRRALEKKA  
AtMYB034 GEGVKKGSWDEEDRLIVYIKNGHC-CWRRALEKKA  
AtMYB051 GEGVKKGSWDEEDRLIVYIKNGHC-CWRRALEKKA  
AtMYB122 ARGVKKGSWDEEDRLIVYIKNGHC-CWRRALEKKA  
AcMYB20 KGVYKKGGSWDEEDRLIVYIKNGHC-CWRRALEKKA  
CsiMYB33 KGVYKKGGSWDEEDRLIVYIKNGHC-CWRRALEKKA  
PtMYB004 KGVYKKGGSWDEEDRLIVYIKNGHC-CWRRALEKKA  
PtMYB007 KGVYKKGGSWDEEDRLIVYIKNGHC-CWRRALEKKA  
VvMYB010 KGVYKKGGSWDEEDRLIVYIKNGHC-CWRRALEKKA  
SlMYB085 KGVYKKGGSWDEEDRLIVYIKNGHC-CWRRALEKKA  
StMYB017 KGVYKKGGSWDEEDRLIVYIKNGHC-CWRRALEKKA  
CsiMYB36 KGVYKKGGSWDEEDRLIVYIKNGHC-CWRRALEKKA  
VvMYB055 KGVYKKGGSWDEEDRLIVYIKNGHC-CWRRALEKKA  
PtMYB129 KGVYKKGGSWDEEDRLIVYIKNGHC-CWRRALEKKA  
PtMYB159 KGVYKKGGSWDEEDRLIVYIKNGHC-CWRRALEKKA  
OsMYB089 KGVYKKGGSWDEEDRLIVYIKNGHC-CWRRALEKKA  
ZmMYB111 KGVYKKGGSWDEEDRLIVYIKNGHC-CWRRALEKKA  
AtMYB042 KGVYKKGGSWDEEDRLIVYIKNGHC-CWRRALEKKA  
ZmMYB003 KGVYKKGGSWDEEDRLIVYIKNGHC-CWRRALEKKA  
ZmMYB071 KGVYKKGGSWDEEDRLIVYIKNGHC-CWRRALEKKA  
AtMYB085 KGVYKKGGSWDEEDRLIVYIKNGHC-CWRRALEKKA  
AtMYB020 KGVYKKGGSWDEEDRLIVYIKNGHC-CWRRALEKKA  
CsiMYB28 KGVYKKGGSWDEEDRLIVYIKNGHC-CWRRALEKKA  
MtMYB27 KGVYKKGGSWDEEDRLIVYIKNGHC-CWRRALEKKA  
MtMYB53 KGVYKKGGSWDEEDRLIVYIKNGHC-CWRRALEKKA  
SlMYB110 KGVYKKGGSWDEEDRLIVYIKNGHC-CWRRALEKKA  
SlMYB048 KGVYKKGGSWDEEDRLIVYIKNGHC-CWRRALEKKA  
VvMYB091 KGVYKKGGSWDEEDRLIVYIKNGHC-CWRRALEKKA  
PtMYB046 KGVYKKGGSWDEEDRLIVYIKNGHC-CWRRALEKKA  
PtMYB160 KGVYKKGGSWDEEDRLIVYIKNGHC-CWRRALEKKA  
OsMYB079 KGVYKKGGSWDEEDRLIVYIKNGHC-CWRRALEKKA  
ZmMYB113 KGVYKKGGSWDEEDRLIVYIKNGHC-CWRRALEKKA  
ZmMYB115 KGVYKKGGSWDEEDRLIVYIKNGHC-CWRRALEKKA  
OsMYB086 KGVYKKGGSWDEEDRLIVYIKNGHC-CWRRALEKKA  
ZmMYB012 KGVYKKGGSWDEEDRLIVYIKNGHC-CWRRALEKKA  
SlMYB035 KGVYKKGGSWDEEDRLIVYIKNGHC-CWRRALEKKA  
AtMYB043 KGVYKKGGSWDEEDRLIVYIKNGHC-CWRRALEKKA  
PaMYB091 KGVYKKGGSWDEEDRLIVYIKNGHC-CWRRALEKKA  
OsMYB029 KGVYKKGGSWDEEDRLIVYIKNGHC-CWRRALEKKA  
ZmMYB064 KGVYKKGGSWDEEDRLIVYIKNGHC-CWRRALEKKA  
OsMYB065 KGVYKKGGSWDEEDRLIVYIKNGHC-CWRRALEKKA  
ZmMYB092 KGVYKKGGSWDEEDRLIVYIKNGHC-CWRRALEKKA  
AtMYB45 VGLKKGGSWDEEDRLIVYIKNGHC-CWRRALEKKA  
PaMYB115 KGVYKKGGSWDEEDRLIVYIKNGHC-CWRRALEKKA  
PaMYB038 KGVYKKGGSWDEEDRLIVYIKNGHC-CWRRALEKKA  
PpMYB38 KGVYKKGGSWDEEDRLIVYIKNGHC-CWRRALEKKA  
-----



zmmYB100 K... 108  
zmmYB123 K... 108  
AcMYB46 K... 108  
AtzMYB33 K... 108  
CsiMYB03 K... 108  
PtmYB146 K... 108  
VvMYB083 K... 108  
MtmYB86 K... 108  
AtMYB055 K... 108  
PtmYB030 K... 108  
VvMYB095 K... 108  
MtmYB09 K... 108  
PtmYB130 K... 108  
PtmYB055 K... 108  
MtmYB87 K... 108  
OsmYB005 K... 108  
ZmMYB040 K... 108  
OsmYB054 K... 108  
ZmMYB126 K... 108  
ZmMYB150 K... 108  
AtMYB050 K... 108  
CsiMYB04 K... 108  
PamYB049 K... 108  
AtMYB061 K... 108  
AtMYB086 K... 108  
SlMYB009 K... 108  
SlMYB055 K... 108  
KkkYB101 K... 108  
PtmYB049 K... 108  
PmYB11 K... 108  
PmYB15 K... 108  
PmYB25 K... 108  
PmYB27 K... 108  
PmYB22 K... 108  
AtzMYB44 K... 108  
OsmYB036 K... 108  
OsmYB075 K... 108  
ZmMYB019 K... 108  
ZmMYB114 K... 108  
PamYB096 K... 108  
SmaYB03 K... 108  
AcMYB27 K... 108  
CsiMYB44 K... 108  
CsiMYB53 K... 108  
SlMYB014 K... 108  
StMYB027 K... 108  
SlMYB095 K... 108  
PtmYB041 K... 108  
VvMYB028 K... 108  
MtmYB16 K... 108  
PtmYB087 K... 108  
VvMYB120 K... 108  
OsmYB071 K... 108  
ZmMYB116 K... 108  
AtMYB067 K... 108  
PtmYB007 K... 108  
AcMYB47 K... 108  
MtmYB23 K... 108  
SlMYB031 K... 108  
StMYB098 K... 108  
PtmYB009 K... 108  
PtmYB010 K... 108  
VvMYB002 K... 108  
AtMYB026 K... 108  
CsiMYB64 K... 108  
OsmYB013 K... 108  
ZmMYB043 K... 108  
PamYB098 K... 108  
PtmYB113 K... 108  
VvMYB053 K... 108  
AcMYB50 K... 108  
MtmYB43 K... 108  
PtmYB005 K... 108  
PtmYB038 K... 108  
AtMYB103 K... 108  
CsiMYB21 K... 108  
OsmYB077 K... 108  
ZmMYB156 K... 108  
VvMYB057 K... 108  
SlMYB086 K... 108  
AtzMYB02 K... 108  
PamYB059 K... 108  
PamYB057 K... 108  
PamYB074 K... 108  
OsmYB002 K... 108  
ZmMYB044 K... 108  
AcMYB71 K... 108  
CsiMYB24 K... 108  
VvMYB073 K... 108  
PtmYB014 K... 108  
PtmYB101 K... 108  
VvMYB097 K... 108  
SlMYB111 K... 108  
StMYB028 K... 108  
CsiMYB15 K... 108  
PtmYB015 K... 108  
PtmYB102 K... 108  
SlMYB006 K... 108  
LcMYB024 K... 108  
AtzMYB14 K... 108  
MtmYB22 K... 108  
AtMYB083 K... 108  
OsmYB101 K... 108  
ZmMYB146 K... 108  
AtMYB046 K... 108  
PamYB021 K... 108  
PamYB048 K... 108  
PamYB099 K... 108  
PamYB072 K... 108  
PamYB092 K... 108  
PamYB046 K... 108  
PamYB146 K... 108  
PamYB100 K... 108  
PamYB093 K... 108  
PamYB131 K... 108  
PamYB102 K... 108  
PamYB024 K... 108  
PamYB123 K... 108  
PamYB042 K... 108  
PamYB156 K... 107  
PamYB026 K... 108  
PamYB015 K... 108  
PamYB058 K... 108  
AcMYB43 K... 108



FASTA file containing multiple protein sequences. Each entry starts with a header line (e.g., PaMYB139) followed by a single-line sequence of amino acid residues. The sequences are highly similar, often sharing identical motifs such as 'LRLRGGWWSKEDDRLVYVYRHGEGCWRNLPKRA' and 'LRLRGGWWSKEDDRLVYVYRHGEGCWRNLPKRA'. The file ends with a line number 108.







MtMYB64 STDKKGGWSEEDDILKAVVVKHGT-RWVWVSKGLG... 108  
MtMYB65 STDKKGGWSEEDDILKAVVVKHGT-RWVWVSKGLG... 108  
MtMYB67 STDKKGGWSEEDDILKAVVVKHGT-RWVWVSKGLG... 108  
AcMYB38 -MWRKGGWSEEDDILKAVVVKHGT-RWVWVSKGLG... 107  
AcMYB70 DIVLRKGGWSEEDDILKAVVVKHGT-RWVWVSKGLG... 108  
At1MYB48 DQAFKGGWSEEDDILKAVVVKHGT-RWVWVSKGLG... 108  
PaMYB040 -FELKGGWSEEDDILKAVVVKHGT-RWVWVSKGLG... 107  
FpMYB09 DEVLKGGWSEEDDILKAVVVKHGT-RWVWVSKGLG... 108  
PtMYB13 DEVLKGGWSEEDDILKAVVVKHGT-RWVWVSKGLG... 108  
OsmMYB050 GELKGGWSEEDDILKAVVVKHGT-RWVWVSKGLG... 108  
ZmMYB032 CQAFKGGWSEEDDILKAVVVKHGT-RWVWVSKGLG... 108  
ZmMYB155 GQVFKGGWSEEDDILKAVVVKHGT-RWVWVSKGLG... 108  
AtMYB125 KDELKGGWSEEDDILKAVVVKHGT-RWVWVSKGLG... 108  
CsiMYB51 RDELKGGWSEEDDILKAVVVKHGT-RWVWVSKGLG... 108  
VvMYB054 RDELKGGWSEEDDILKAVVVKHGT-RWVWVSKGLG... 108  
PtMYB028 KDELKGGWSEEDDILKAVVVKHGT-RWVWVSKGLG... 108  
PtMYB142 KDELKGGWSEEDDILKAVVVKHGT-RWVWVSKGLG... 108  
PtMYB143 KDELKGGWSEEDDILKAVVVKHGT-RWVWVSKGLG... 108  
SlMYB007 MSEKGGWSEEDDILKAVVVKHGT-RWVWVSKGLG... 108  
SlMYB100 FDELKGGWSEEDDILKAVVVKHGT-RWVWVSKGLG... 108  
MtMYB89 -FELKGGWSEEDDILKAVVVKHGT-RWVWVSKGLG... 107  
ZmMYB04 DEVLKGGWSEEDDILKAVVVKHGT-RWVWVSKGLG... 108  
AtMYB104 KDELKGGWSEEDDILKAVVVKHGT-RWVWVSKGLG... 108  
OsmMYB092 -MKKGGWSEEDDILKAVVVKHGT-RWVWVSKGLG... 103  
AcMYB03 KDELKGGWSEEDDILKAVVVKHGT-RWVWVSKGLG... 107  
CsiMYB68 KDELKGGWSEEDDILKAVVVKHGT-RWVWVSKGLG... 107  
MtMYB48 KDELKGGWSEEDDILKAVVVKHGT-RWVWVSKGLG... 107  
PtMYB094 KDELKGGWSEEDDILKAVVVKHGT-RWVWVSKGLG... 107  
VvMYB060 KDELKGGWSEEDDILKAVVVKHGT-RWVWVSKGLG... 107  
PtMYB106 KDELKGGWSEEDDILKAVVVKHGT-RWVWVSKGLG... 107  
AtMYB124 KDELKGGWSEEDDILKAVVVKHGT-RWVWVSKGLG... 107  
SlMYB033 PKERHIVSWSEEDDILKAVVVKHGT-RWVWVSKGLG... 107  
SlMYB042 PKERHIVSWSEEDDILKAVVVKHGT-RWVWVSKGLG... 107  
StMYB075 PKERHIVSWSEEDDILKAVVVKHGT-RWVWVSKGLG... 107  
StMYB010 ----VDELKGGWSEEDDILKAVVVKHGT-RWVWVSKGLG... 107  
StMYB079 PKERHIVSWSEEDDILKAVVVKHGT-RWVWVSKGLG... 102  
AtMYB098 KDELKGGWSEEDDILKAVVVKHGT-RWVWVSKGLG... 107  
At1MYB09 QDRRHIVSWSEEDDILKAVVVKHGT-RWVWVSKGLG... 107  
OsmMYB073 KDRRHIVSWSEEDDILKAVVVKHGT-RWVWVSKGLG... 107  
ZmMYB029 RDRRHIVSWSEEDDILKAVVVKHGT-RWVWVSKGLG... 107  
CrMYB09 ----MADWSEEDDILKAVVVKHGT-RWVWVSKGLG... 102  
VvMYB5 ----MADWSEEDDILKAVVVKHGT-RWVWVSKGLG... 102  
VvMYB6 ----MTAFSEEDDILKAVVVKHGT-RWVWVSKGLG... 93  
PpMYB45 ----DDTAFSEEDDILKAVVVKHGT-RWVWVSKGLG... 104  
AcMYB04 SKLCAKGGWSEEDDILKAVVVKHGT-RWVWVSKGLG... 107  
At1MYB11 SKLCAKGGWSEEDDILKAVVVKHGT-RWVWVSKGLG... 107  
SlMYB045 SKLCAKGGWSEEDDILKAVVVKHGT-RWVWVSKGLG... 107  
StMYB058 SKLCAKGGWSEEDDILKAVVVKHGT-RWVWVSKGLG... 103  
VvMYB059 SKLCAKGGWSEEDDILKAVVVKHGT-RWVWVSKGLG... 107  
MtMYB34 SKLCAKGGWSEEDDILKAVVVKHGT-RWVWVSKGLG... 107  
VvMYB030 SKLCAKGGWSEEDDILKAVVVKHGT-RWVWVSKGLG... 107  
CsiMYB77 TTKCAKGGWSEEDDILKAVVVKHGT-RWVWVSKGLG... 107  
MtMYB49 SSKCAKGGWSEEDDILKAVVVKHGT-RWVWVSKGLG... 107  
PtMYB088 SKLCAKGGWSEEDDILKAVVVKHGT-RWVWVSKGLG... 107  
PtMYB112 SKLCAKGGWSEEDDILKAVVVKHGT-RWVWVSKGLG... 107  
CsiMYB85 SKLCAKGGWSEEDDILKAVVVKHGT-RWVWVSKGLG... 107  
At1MYB49 SKLCAKGGWSEEDDILKAVVVKHGT-RWVWVSKGLG... 107  
PtMYB134 SKLCAKGGWSEEDDILKAVVVKHGT-RWVWVSKGLG... 107  
PtMYB183 SKLCAKGGWSEEDDILKAVVVKHGT-RWVWVSKGLG... 107  
PaMYB107 SKLCAKGGWSEEDDILKAVVVKHGT-RWVWVSKGLG... 107  
OsmMYB04 SKLCAKGGWSEEDDILKAVVVKHGT-RWVWVSKGLG... 107  
ZmMYB048 SKLCAKGGWSEEDDILKAVVVKHGT-RWVWVSKGLG... 107  
ZmMYB127 SKLCAKGGWSEEDDILKAVVVKHGT-RWVWVSKGLG... 107  
SlMYB103 SKLCAKGGWSEEDDILKAVVVKHGT-RWVWVSKGLG... 107  
StMYB086 ----SGKRRSEEDDILKAVVVKHGT-RWVWVSKGLG... 103  
MtMYB81 SKLCAKGGWSEEDDILKAVVVKHGT-RWVWVSKGLG... 107  
AtMYB105 FSVLRKGGWSEEDDILKAVVVKHGT-RWVWVSKGLG... 107  
AtMYB117 FSVLRKGGWSEEDDILKAVVVKHGT-RWVWVSKGLG... 107  
OsmMYB081 SRLAARGGWSEEDDILKAVVVKHGT-RWVWVSKGLG... 107  
ZmMYB022 SRLAARGGWSEEDDILKAVVVKHGT-RWVWVSKGLG... 107  
PtMYB166 PKICARGGWSEEDDILKAVVVKHGT-RWVWVSKGLG... 107  
AcMYB65 NKSCARGGWSEEDDILKAVVVKHGT-RWVWVSKGLG... 107  
AcMYB24 ----MCRGGWSEEDDILKAVVVKHGT-RWVWVSKGLG... 105  
At1MYB21 ----MCRGGWSEEDDILKAVVVKHGT-RWVWVSKGLG... 105  
CsiMYB40 ----MCRGGWSEEDDILKAVVVKHGT-RWVWVSKGLG... 105  
VvMYB023 ----MCRGGWSEEDDILKAVVVKHGT-RWVWVSKGLG... 105  
PtMYB121 ----MCRGGWSEEDDILKAVVVKHGT-RWVWVSKGLG... 105  
PtMYB151 ----MCRGGWSEEDDILKAVVVKHGT-RWVWVSKGLG... 105  
OsmMYB041 ----MCRGGWSEEDDILKAVVVKHGT-RWVWVSKGLG... 105  
ZmMYB008 ----MCRGGWSEEDDILKAVVVKHGT-RWVWVSKGLG... 105  
ZmMYB090 ----MCRGGWSEEDDILKAVVVKHGT-RWVWVSKGLG... 105  
AtMYB052 ----MCRGGWSEEDDILKAVVVKHGT-RWVWVSKGLG... 105  
AtMYB054 ----MCRGGWSEEDDILKAVVVKHGT-RWVWVSKGLG... 105  
PtMYB080 ----MCRGGWSEEDDILKAVVVKHGT-RWVWVSKGLG... 105  
PtMYB162 ----MCRGGWSEEDDILKAVVVKHGT-RWVWVSKGLG... 105  
AcMYB26 KVICARGGWSEEDDILKAVVVKHGT-RWVWVSKGLG... 107  
CsiMYB18 TSTCFRGGWSEEDDILKAVVVKHGT-RWVWVSKGLG... 107  
VvMYB027 AKTFCRGGWSEEDDILKAVVVKHGT-RWVWVSKGLG... 107  
PtMYB023 STAFCRGGWSEEDDILKAVVVKHGT-RWVWVSKGLG... 107  
PtMYB068 STAFCRGGWSEEDDILKAVVVKHGT-RWVWVSKGLG... 107  
SlMYB037 SSKCFRGGWSEEDDILKAVVVKHGT-RWVWVSKGLG... 107  
StMYB073 SSKCFRGGWSEEDDILKAVVVKHGT-RWVWVSKGLG... 107  
PaMYB111 ----MCRGGWSEEDDILKAVVVKHGT-RWVWVSKGLG... 105  
PpMYB19 SKLCAKGGWSEEDDILKAVVVKHGT-RWVWVSKGLG... 107  
PpMYB49 SKLCAKGGWSEEDDILKAVVVKHGT-RWVWVSKGLG... 107  
PpMYB23 SKLCAKGGWSEEDDILKAVVVKHGT-RWVWVSKGLG... 107  
PpMYB51 SKLCAKGGWSEEDDILKAVVVKHGT-RWVWVSKGLG... 107  
PpMYB48 SKKCFRGGWSEEDDILKAVVVKHGT-RWVWVSKGLG... 107  
At1MYB52 KSSAFRGGWSEEDDILKAVVVKHGT-RWVWVSKGLG... 107  
OsmMYB094 SSACFRGGWSEEDDILKAVVVKHGT-RWVWVSKGLG... 107  
VvMYB075 GRNCFRGGWSEEDDILKAVVVKHGT-RWVWVSKGLG... 107  
PpMYB37 SKLCAKGGWSEEDDILKAVVVKHGT-RWVWVSKGLG... 107  
SmMYB09 SKLCAKGGWSEEDDILKAVVVKHGT-RWVWVSKGLG... 107  
StMYB092 SKLCAKGGWSEEDDILKAVVVKHGT-RWVWVSKGLG... 107  
FpMYB16 SKKCFRGGWSEEDDILKAVVVKHGT-RWVWVSKGLG... 107  
MtMYB73 ----SGKRRSEEDDILKAVVVKHGT-RWVWVSKGLG... 103  
VvMYB089 NKVCGRGGWSEEDDILKAVVVKHGT-RWVWVSKGLG... 107  
AtMYB056 TKVCGRGGWSEEDDILKAVVVKHGT-RWVWVSKGLG... 107  
AtMYB069 KPSCFRGGWSEEDDILKAVVVKHGT-RWVWVSKGLG... 107  
PtMYB056 NPSCFRGGWSEEDDILKAVVVKHGT-RWVWVSKGLG... 107  
PtMYB081 KPSCFRGGWSEEDDILKAVVVKHGT-RWVWVSKGLG... 107  
ZmMYB059 BARDFRGGWSEEDDILKAVVVKHGT-RWVWVSKGLG... 107  
ZmMYB046 RAGHFRGGWSEEDDILKAVVVKHGT-RWVWVSKGLG... 107  
AtMYB110 SRVCGRGGWSEEDDILKAVVVKHGT-RWVWVSKGLG... 107  
FpMYB12 GIKCFRGGWSEEDDILKAVVVKHGT-RWVWVSKGLG... 104  
ZmMYB057 GKICFRGGWSEEDDILKAVVVKHGT-RWVWVSKGLG... 107  
PaMYB095 YKICFRGGWSEEDDILKAVVVKHGT-RWVWVSKGLG... 105  
AtMYB089 KKKRGGWSEEDDILKAVVVKHGT-RWVWVSKGLG... 107  
AcMYB05 SDDRVGWSSEEDDILKAVVVKHGT-RWVWVSKGLG... 107  
PpMYB42 TDDRGGWSEEDDILKAVVVKHGT-RWVWVSKGLG... 107  
PpMYB47 TDDRGGWSEEDDILKAVVVKHGT-RWVWVSKGLG... 107  
At1MYB22 SDEIRGGWSEEDDILKAVVVKHGT-RWVWVSKGLG... 107  
SlMYB091 TADRGGWSEEDDILKAVVVKHGT-RWVWVSKGLG... 107  
StMYB065 TADRGGWSEEDDILKAVVVKHGT-RWVWVSKGLG... 107  
VvMYB105 RDDRGGWSEEDDILKAVVVKHGT-RWVWVSKGLG... 107  
CsiMYB02 SSSRVGWSSEEDDILKAVVVKHGT-RWVWVSKGLG... 107

S26

S28



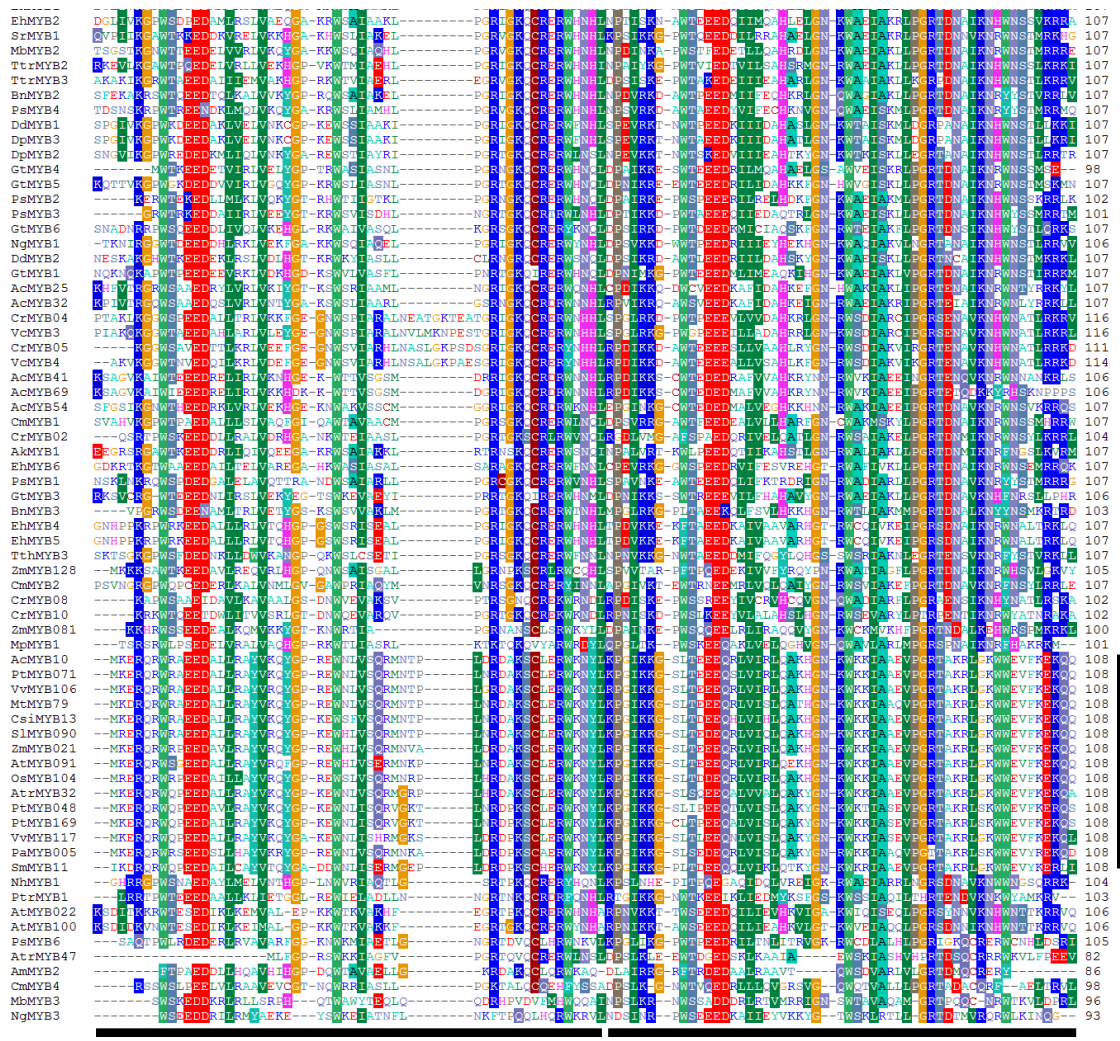

S27

**Supplementary Figure S2. Alignment of the MYB domains of all 2R-MYB proteins used in this study.** Multiple alignment using Fast Fourier Transform (MAFFT) was used for the alignment of amino acid sequences of the 1548 eukaryote MYB domains. The shading of the alignment represents different degrees of conservation among sequences. Asterisks indicate conserved tryptophan residues (W), while black arrows indicate conserved residue insertions within the MYB domains. The detail subfamilies of the corresponding proteins that could be found in Supplementary Figure S1.

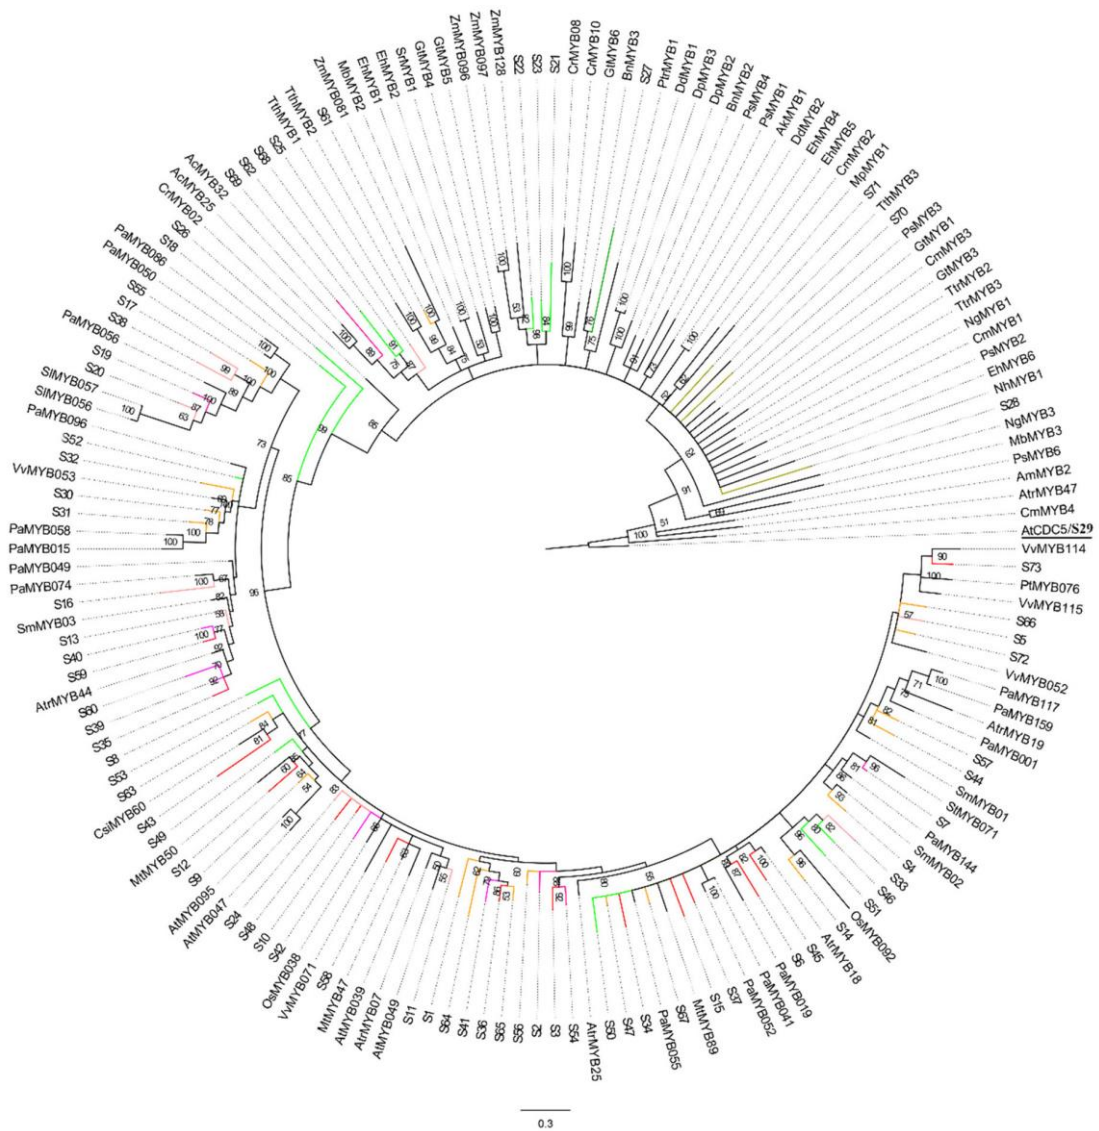

**Supplementary Figure S3. Bayesian analysis of one representative from each subfamily of plant 2R-MYB genes (73 subfamilies) and all “orphan” genes** The tree was rooted on a CDC5-like sequence (S29 subfamily). Numbers in each clade are posterior probability values, and clades with less than 50% support were collapsed. The colored lines symbolize the species to which the proteins in each subfamily belong, which are consistent with Figure 2.

**Supplementary Table S1. The species used in this study and the corresponding candidate 2R-MYB and 3R-MYB genes identified in each species.**

| Eukaryote                   | Lineage          | Species                                | Genome ID NO.                                                          | Name       | MYB-domain (protein sequence)                                                                                             |
|-----------------------------|------------------|----------------------------------------|------------------------------------------------------------------------|------------|---------------------------------------------------------------------------------------------------------------------------|
|                             | Amoebozoa        | <i>Dictyostelium purpureum</i>         | XP_003286840.1                                                         | Dp2R-MYB1  | MRGIKGGVWKNTEDEILKVAIMKYGLNQWARISSLLTRKSPAQCKARWYEWLDPNIKTEWSKEEEEKLLHLAKIFPSQWKTIAPLVGR TSAQCLERYNKLLDEVQ                |
|                             |                  | <i>Dictyostelium purpureum</i>         | XP_003293587.1                                                         | Dp2R-MYB2  | SPGIVKGPWKDEEDAKLVELVNKCGPKEWSSIAAKIPGRIGKQCRERWFNHLSPVVRKTNWTAEDDKIIDAHA TLGNKWT AISKMLDGR PANAIKNHWNSTLLKRI             |
|                             |                  | <i>Dictyostelium discoideum</i>        | XP_636296.1                                                            | Dd2R-MYB1  | SPGIVKGPWKDEEDAKLVELVNKCGPKEWSSIAAKIPGRIGKQCRERWFNHLSPVVRKTNWTP EEDKIIDA HASLG NKWTAISKMLDGR PANAIKNHWNSTLLKKI            |
|                             |                  | <i>Dictyostelium discoideum</i>        | XP_001732948.1                                                         | Dd2R-MYB2  | NESKAKGHWTK EDEKLRSLVDLHGTRKWKYIASLLCLRNGRQCRERWSNQLDPSIKRDAWTL EEDRIILDAHSKYGNKWA EISKLLPGRTNCAIKNHWNSTMKRKL             |
|                             |                  | <i>Dictyostelium discoideum</i>        | XP_641787.1                                                            | Dd2R-MYB3  | MRNVKGGVWKNTEDEILKVAIMKYGLNQWARISSLLTRKSPAQCKARWHEWLDPSIKKTEWSKEEEEKLLHLAKIFPSQWKTIAPLVGR TSAQCLERYNRLLDEVQ               |
|                             |                  | <i>Dictyostelium discoideum</i>        | XP_628877.1                                                            | Dd3R-MYB1  | EKKKTGKWTSEEDQILKAVNLHNQKNWKKIAEHFPDR TDVQCHHRYQKVLHPNLVKGAWTKDEDDKVI ELVKTYGPKK WSDIALHLKGRMGKQCRERWHNHLNPNKKEA          |
|                             | Apusozoa         | <i>Thecamonas trahens ATCC 50062</i>   | AMSG_11925                                                             | Ttr2R-MYB1 | MRIRYKGGVWKNTEDEILKVAIMKYGLRNWARV ASLFVRKSAKQCKARWYEWLDP SIKKTQWSREEEELLYLAKAMPQWRTIAPLVGRTPAQCLEHYERLLSQAA               |
|                             |                  | <i>Thecamonas trahens ATCC 50062</i>   | AMSG_05308                                                             | Ttr2R-MYB2 | RKEVLKGAWTPQEDELVRLLVEKHGPKWVTMIAEHLPRIGKQCRERWHNHNPAIYKGPWTVIEDTVILSAHSRMGNRWAEIAKLLPGRTDNAIKNHWNSSLKRKI                 |
|                             |                  | <i>Thecamonas trahens ATCC 50062</i>   | AMSG_09258                                                             | Ttr2R-MYB3 | AKAKIKGRWTA EEDAIIEMVAKHGPRKWNTVIAERLEGRVKGQCRERWHNHLDP SISKPEPWTAK EDEIII EAHARLG NKWAAIAKLLKGRPDNAIKNHWNSTLKR RV        |
|                             |                  | <i>F. alba ATCC 38817 (V2)</i>         | H696_04435                                                             | Fa2R-MYB1  | MTRIITKGGVWRNTEDEILKAAVMKYGLSQWARISSLLSRKTPKQCKARWENWLDPNIKTEWSTEEERLVHLATLMPQWNTIAKQLNGRTADQCLEHYKSLQLAAV                |
|                             | Fung             | <i>Allomyces macrogynus ATCC 38327</i> | AMAG_19492.2                                                           | Am2R-MYB1  | MRVVIKGGVWKNTEDEILKVAVMKYGKNQWARISSLLTRKTPKQCKARWYEWLDP SIKKTEWSKDEDEKLLHLAKLMPTQWRTIAPIVGRTPAQCLDRYQKLLDDAE              |
|                             |                  | <i>Allomyces macrogynus ATCC 38327</i> | AMAG_01769.2                                                           | Am2R-MYB2  | YNERIGCKFTPAEDDLLHQAVHIHGPDQWTA VAEELGKRDAKQCLQRWKAQDLAIRRGRFTRDEDAALRAAVTQC GEK WSDVARLVGR TDMQCRERY                     |
|                             |                  | <i>Allomyces macrogynus ATCC 38327</i> | AMAG_04267.2                                                           | Am3R-MYB1  | YNERIGRKFPAEDDLLHQAVHIHGPDQWTSVADLLGTRDAKQCLQRWKAQDPAIRRGRFTRDEDAALRAAVTQC GEK WSDVARLVGR TDMQCRERY                       |
|                             |                  | <i>Spizellomyces punctatus</i>         | SPPG_07992                                                             | Sp2R-MYB1  | TGEWTA EEDAKLLELV AKEGTVKSSVAEQMPGRTDGMVRLRYAKLRTEIE                                                                      |
|                             |                  | <i>Ustilago maydis</i>                 | XP_760558.1                                                            | Um2R-MYB1  | MRILIKGGVWKNTEDEILKAAVMKYGKNQWARISSLLTRKSPKQCKARWYEWLDASIKKTEWSKEEDERLLHLAKLMPTQWRTIAPMVGR TAAQCLERYQKLLDEAE              |
|                             |                  | <i>Ustilago maydis</i>                 | XP_760248.1                                                            | Um3R-MYB1  | RVIKGGVWKNTEDEILKAAISKYGNQWARISSLLVRKTPKQCKARWYEWLDP SIKKTEWSKEEDEKLLHLAKLMPTQWRTIAPLVGR TANHCLERYQKLLDQAE                |
|                             |                  | <i>Saccharomyces cerevisiae</i>        | NP_013940.1                                                            | Sc2R-MYB1  | MAGKRNWRTRNEDEILKKA VLSSAKPRPSWAMIAKHIPGRSSKDCRKRWEHGLNQLSRGPWGSSEDARLKA AVAEHGLHWALVATVKGR TSDQCAKRWCDVLDPSLKKSE         |
|                             |                  | <i>Saccharomyces cerevisiae</i>        | NP_013025.1                                                            | Sc3R-MYB1  | WTAEDESDALLGLYQQLGTAWAKLATHIPGRSALSCRNRACKILVQRG                                                                          |
|                             |                  | <i>Nectria haematococca</i>            | XP_003047537.1                                                         | Nh2R-MYB1  | MPPVPIYVKG VWTNVEDQILKAAVQKYGTHQWSKVASLLQKKTARQSELRWNEYLNPKNLNFTEFSKEEDAQLLDLARELPNQWRTIADMMARPAQVCVERYNRLLSEED           |
|                             |                  | <i>Nectria haematococca</i>            | XP_003046050.1                                                         | Nh2R-MYB2  | HRKNGRNSWSKDDNMLRSLVNESAKELGYENGLDVKTIQQSNHLSKCIAWDVLATRFKHTVRTSKDVRKRWTGSLDPNLKKGKWTQE EDEQLLKA YEEHGHPLWLSISMDIP        |
| <i>Nectria haematococca</i> | XP_003048416.1   | Nh3R-MYB1                              | GRTEQCAKRYIEVLGPGSKGRLEWTL EEDLNLSKVKAYGTKWRKISSEMEFRPSLTCRNRWRKIITMVV |            |                                                                                                                           |
|                             | Ichthyosporia    | <i>S. arctica JP610</i>                | SARC_05959                                                             | Sa2R-MYB1  | MGHRRPWSNAEDAYLMELVNTHGPLNWRVIAQTLSRTPKQCRERYHQNLKPSLNEHIPITPQEGAQIDQLVREIGKRWAEIARRLNGRSDNAVKNW WNGSQNRK                 |
|                             |                  | <i>S. arctica JP610</i>                | SARC_01616.1                                                           | Sa3R-MYB1  | MPVVKGGVWNTNIEDEILKASVSKYGLNQWARVSSLLARKTPKQCKARWENWLDPSIKKIEWSKDEDEKLLHLAKIMPTQWRTIAPIVGR TANQCLERYQKLLDEAE              |
|                             | Filasterea       | <i>C. owczarzaki ATCC 30864</i>        | CAOG_00996                                                             | Co2R-MYB1  | HRRPWTSTEDSALRTLVAHF GDSRGPGRWKDIAAGLQGR TADKCRKRWFHSLRKGRTAQDELLLSAYARLGPAWHDIALIPGRKDDQCSKRYNDILNPSAQNR LSD             |
|                             |                  | <i>C. owczarzaki ATCC 30864</i>        | CAOG_00301.2                                                           | Co3R-MYB1  | WTAQEDNLLRGGVATLGRHWAAISSRIPGRPLTCRNRWRWTLSD                                                                              |
|                             | Choanoflagellata | <i>M. brevicollis MX1</i>              | MONBRDRAFT_33087                                                       | Mb2R-MYB1  | MRMIVKGGVWKNTEDEILKAAVMKYGKNQWARIASLLHRKTAQCKARWYEWLDP SIKKTEWTR EEEELKLLHLAKLFTQWRTIAPMIGRTGGQCLAHY EYLLDQAQ             |
|                             |                  | <i>M. brevicollis MX1</i>              | MONBRDRAFT_33265                                                       | Mb2R-MYB2  | KSTKRLKQWTK EEDKILREVVD RYGEKFDMATQYLTHRSEGQIAQRWLKVLSPDIVKGAWTP EEDA KVI ELIKENGT KDWSLISGFLPGRV GKQCRERWHNHLNPEVRKGPWTS |
|                             |                  | <i>M. brevicollis MX1</i>              | MONBRDRAFT_22022                                                       | Mb2R-MYB3  | EEEGTIEAQA RLGNKWSQISALIPGR TDNAIKNYWNSTIKKKV                                                                             |
|                             |                  | <i>M. brevicollis MX1</i>              | MONBRDRAFT_27866.2                                                     | Mb3R-MYB1  | MPRVLIKGGVWKNTEDEILKAAVMKYGMNQWSRIASLLHRKTAQCKARWYEWLDP SIKKTEWSREEEELKLLHLAKLMPTQWRTIAPMIGRTAAQCLEHYERLLDQAQ             |
|                             |                  | <i>M. brevicollis MX1</i>              | MONBRDRAFT_16076.2                                                     | Mb3R-MYB2  | EDEPDAAPWTDKQDAELRYCVDSWDVRKDWTVIAARIPHTAMQCARRWQKLNQIVRGSWTP EEDLRV IQLVDQIGACQWPIIASFLIGRIGKQCRERYHNHLNPNIKKDPWST       |
|                             |                  | <i>S. rosetta</i>                      | PTSG_12328                                                             | Sr2R-MYB1  | EEDNLLLEHQEFGNKWAEIAKHMEGRTDNAIKNRNSTVSRRA                                                                                |
|                             |                  | <i>S. rosetta</i>                      | PTSG_09300                                                             | Sr2R-MYB2  | MPPVFIKGGVWNTNVEDEVLKAAVMKYGPNQWDRVASLLHRKSAKQCKYRWYEWLDP SIKKTEWSREEEELKLLHLAKTMSSQWRTIAPMIGRTPIQCLERYEKLDDQAQ           |
|                             |                  | <i>S. rosetta</i>                      | PTSG_00973.1                                                           | Sr3R-MYB1  | TSGSTKGNWTT EDELVRVLVKQYGA KKWSQIAQHLPGRV GKQCRERWHNHLNPDINKAPWSTFEDETLQAH RDLGNKWA EIAKLLPGRTDNAIKNRWNSTMRRRE            |
|                             |                  | <i>S. rosetta</i>                      | PTSG_08337.1                                                           | Sr3R-MYB2  | SWSKEDDKRLREL VLSRPHQTWAWYTEQLQDRHPVDVFMHWQAINPSLVKRNWSSADDDRLRTVMRRIGNSDWTAVAQAMGDRTPQQC NLRWTKVLDPRL                    |
|                             | Metazoa          | <i>Nematostella vectensis</i>          | estExt_gwp.C_1220079                                                   | Nv2R-MYB1  | KKKTTTLRWGSD EDRRLDLVQQRQAKTTLSIDDDHFWLAI AQNMPGRDASHCAARWKNMLDPTLIKAWTQEEDLVINLVNKYGPCNWTKIAQHLKGRIGKQCRERWHNA           |
|                             |                  | <i>Daphnia pulex v1</i>                | stExt_Genewise1.C_40100                                                | Dap2R-MYB1 | LAPHLKRGPWSEDEKRTLIDAHARLGNRWAEISKLLPGRTDNHCKNFVNSMKTKKV                                                                  |
|                             |                  | <i>Lottia gigantea</i>                 | estExt_Genewise1.C_sca_340094                                          | Lg2R-MYB1  | GRSHSTRRTWKAEDQRLVEA VERHQGKNWKKVAEEFEGRTDVQCLHRWQKVLNPDLVKGPWTK EEDDLV IQLVDKYGPKRWSLIAGHLKGRIGKQCRERWHNHLHPDIKTP        |
|                             |                  | <i>Caenorhabditis elegans</i>          | NP_492303.1                                                            | Ce2R-MYB1  | WTAEERVIMNAHLRLGNKWA EIAKLLPGRTDNSVKNHWNSTMRRR                                                                            |
|                             |                  | <i>Drosophila melanogaster</i>         | NP_612033.1                                                            | Dm2R-MYB1  | QVPIIKGAWTK EDDK VREL VKKHGAKHWSLIAKELPGRV GKQCRERWHNHLKPSIKKGPWTQEEDLIRRAHAELGNKWA EIAKRLPGRTDNVKNRWNSTMRRKHG            |
|                             |                  | <i>Drosophila melanogaster</i>         | NP_511170.1                                                            | Dm3R-MYB1  | MSARIFIKGGVWKNTEDEILKAAVMKYGPNQWDRVASLLHRKSAQAQCKRRWYEWLDP SIKKTEWSREEEELKLLHLAKLMPTQWMTFAPMIGRTASQCLEHYEKLDDQAQ          |
|                             |                  | <i>Homo sapiens</i>                    | NP_001244.1                                                            | Hs2R-MYB1  | RWTKEEDSRLKTLVKQFEAEGITDDTLWQKVAEQMPGRDCHSAHRWKNMLDPSLVKGAWSK EEDAKVVELVKIYGRNWSKIAQHLKGRIGKQCRERWHNHLNPD LKRG            |
|                             |                  | <i>Homo sapiens</i>                    | NP_001155128.1                                                         | HsC-MYB    | WSEEEQRILEEAHARLG NKWAAIAKLLPGRTDNHKNHWNMMMAKQA                                                                           |
|                             |                  |                                        |                                                                        |            | QMQKQSKSWLPEEDTILRDAITLYGTDNWSAVSNLFYARSQNCLQRWEKMHNPITQKGPWTK EEDTLLHQLVQEHGAKNWEIAKMKTRV GKQCRERWHNHLDP SVKKG           |
|                             |                  |                                        |                                                                        |            | AWSDDEERILLDAHKKLG NKWAEIAKLLPGRTDNAVKNHWNSTMRRRKL                                                                        |

Unikonts

|                                 |                                         |                                      |            |                                                                                                                                                                                                                                                                                                                                                                                                                                                                                                                                                                                                     |
|---------------------------------|-----------------------------------------|--------------------------------------|------------|-----------------------------------------------------------------------------------------------------------------------------------------------------------------------------------------------------------------------------------------------------------------------------------------------------------------------------------------------------------------------------------------------------------------------------------------------------------------------------------------------------------------------------------------------------------------------------------------------------|
|                                 | <i>Homo sapiens</i>                     | NP_001073885.1                       | HsA-MYB    | KKLWNRVWTRDEDDKLLKLVQHGHTDDWTLIASHLQNRSDFCQCHRWQKVLNPELIKGPWTKEEDQRVIELVQKYGPKRWSLIAKHLKGRIGKQCRERWHNHLNPEVKKSS<br>WTEEDRIIYEAHKRLGNRWAEIAKLLPGRTDNSIKNHWNSTMRRKV<br>RDSKCKVKWTHEEDEQLRALVRQFGQDQWFLASHFPNRTDQCCQYRWLRVLPDLVKGPPWTKEEDQKVIELVKKYGTQWTLIAKHLKGRIGKQCRERWHNHLNPEVKKSS<br>CWTEEDRIICEAHKVLGNRWAEIAKMLPGRTDNAVKNHWNSTIKRKKV                                                                                                                                                                                                                                                             |
|                                 | <i>Homo sapiens</i>                     | NP_002457.1                          | HsB-MYB    |                                                                                                                                                                                                                                                                                                                                                                                                                                                                                                                                                                                                     |
|                                 | <i>Amphimedon queenslandica</i>         | XP_003390703.1                       | Aq2R-MYB1  | MPRIMIKGGIWKNTDEILKAAVMKYGKNQWARIASLLHKKSAKQCKARWYEWLDPSEIKKTEWSRDEEEKLLHLAKLMPQWRTIPIVGRTPAQCLEHYEYLLDKVQ                                                                                                                                                                                                                                                                                                                                                                                                                                                                                          |
| Excavata                        | <i>Naegleria gruberi</i>                | estExt_fgeneshHS_pg.C_360048         | Ng2R-MYB1  | TKNIRGGWTDDEDDHLRKLVEKFGAKKWSQIAQELPGRIGKQCRERWYNHLDPVSKKDWWTPEEDRIIEYHEKHGNKWAQIAKVLNVRTANAIAKNHWNSTLRRVV                                                                                                                                                                                                                                                                                                                                                                                                                                                                                          |
|                                 | <i>Naegleria gruberi</i>                | fgeneshHS_kg.scaffold_62000007       | Ng2R-MYB2  | KQFVRGGPWKNSSEDEILKAAVMKYGKNQWARVASLLNRKSAKQCKARWYEWLDPSEIKKTEWTREEEKLLHLAKIMPSQWKSIAPIVGRTPAQCLEHYEQMLDEEQ                                                                                                                                                                                                                                                                                                                                                                                                                                                                                         |
|                                 | <i>Naegleria gruberi</i>                | estExt_fgeneshNG_pg.C_350171         | Ng2R-MYB3  | SKRKQQVKWSEEDRILRMYAEKEYSWKEIATNFLNDKFTPPQLHQRWKRVLNDNSINREPWSEEDKAIIEYVKKYGCTWSKLRLLGTQRTDTMVRQRWLKITNGQG<br>MLRAAVQTYGGKNWKKIAETLQNRSTVQCLHRWQKVLNPNLVKGPWTKEEDKILQLVKTYGPNWSMIASHLPGRIGKQCRERWYNHLDPSEIKKTEWTREEEETLLDQAQSKL<br>GNKWAEISKLVGRDACKNHFNSLIAREKKK                                                                                                                                                                                                                                                                                                                                   |
|                                 | <i>Naegleria gruberi</i>                | e_gw1.14.170.1                       | Ng3R-MYB1  |                                                                                                                                                                                                                                                                                                                                                                                                                                                                                                                                                                                                     |
|                                 | <i>Trypanosoma brucei</i>               | XP_844880.1                          | Tb2R-MYB1  | MTRLHFKGGAWTNSDQVLRASLTVYGLQNWERVASTLVKKTATQCRERWENFLDPRLNINEAWTAEENLVQLQSLFPNQWLSISQEVSRRCGMNRPWLCEEQYHSLDLDA<br>MSRLHFKGGAWTNAEDEVKMAAALAQYGLRDWERVASMLTKKTATQCRERWENYLDPRLNIEHAWSEEEKLVQLALFPHKWRLLISEQLTRTPNHYIRPAWLCEQRYLELK<br>DEQE                                                                                                                                                                                                                                                                                                                                                           |
|                                 | <i>Leishmania major</i>                 | XP_001682333.1                       | Lm2R-MYB1  |                                                                                                                                                                                                                                                                                                                                                                                                                                                                                                                                                                                                     |
| Haptophyta                      | <i>Emiliania huxleyi CCMP1516</i>       | estExtDG_Genewise1Plus.C_46200<br>05 | Eh2R-MYB1  | DGLIVKGPWSDPEDAMLRSLVAEQGAKRWSAIAAKLPGRIGKQCRERWHNHLNPTISKNAWTEEDQIIMQAHLELGNKWAEIAKRLPGRDINAIAKNHWNSSVKRRA                                                                                                                                                                                                                                                                                                                                                                                                                                                                                         |
|                                 | <i>Emiliania huxleyi CCMP1516</i>       | estExtDG_Genewise1.C_1310030         | Eh2R-MYB2  | DGLIVKGPWSDPEDAMLRSLVAEQGAKRWSAIAAKLPGRIGKQCRERWHNHLNPTISKNAWTEEDQIIMQAHLELGNKWAEIAKRLPGRDINAIAKNHWNSSVKRRA                                                                                                                                                                                                                                                                                                                                                                                                                                                                                         |
|                                 | <i>Emiliania huxleyi CCMP1516</i>       | estExtDG_fgenesh_newKGs_kg.C_2520018 | Eh2R-MYB3  | MRILIKGGVWKNTEDEILKAAVMKYGKNQWSRISLLVRKSAKQCKARWHEWLDPSIKKTEWSREEEKLLHLAKLMPQWRTIPIVGRTPAQCLEHYERLLDQAT                                                                                                                                                                                                                                                                                                                                                                                                                                                                                             |
|                                 | <i>Emiliania huxleyi CCMP1516</i>       | estExtDG_fgenesh_newKGs_kg.C_1550001 | Eh2R-MYB4  | GNHPPKRPWRKEEDALLRLVTQHGPWSRSEALPGRIGKQCRERWHNHLTPDVKKEKFTAEDKAIVAAVARHGTRWCQIVKEIPGRSDNAIKNRWALTRKLQ                                                                                                                                                                                                                                                                                                                                                                                                                                                                                               |
|                                 | <i>Emiliania huxleyi CCMP1516</i>       | estExtDG_fgenesh_newKGs_kg.C_220091  | Eh2R-MYB5  | GNHPPKRPWRKEEDALLRLVTQHGPWSRSEALPGRIGKQCRERWHNHLTPDVKKEKFTAEDKAIVAAVARHGTRWCQIVKEIPGRSDNAIKNRWALTRKLQ                                                                                                                                                                                                                                                                                                                                                                                                                                                                                               |
|                                 | <i>Emiliania huxleyi CCMP1516</i>       | e_gw1.60.8.1                         | Eh2R-MYB6  | GDKRTKGTWAAEEDAILTELVAAREGAHKWASIASALSARGGVERAGKQCRERWFNLCPEVRKGGWSPEEDRVIFESVREHGTRWAFIVKLLPGRDINAIAKNRWNSEMRRQK                                                                                                                                                                                                                                                                                                                                                                                                                                                                                   |
| Rhizaria                        | <i>Bigelowiella natans CCMP2755</i>     | estExt_Genewise1.C_230192            | Bn2R-MYB1  | MRIMIKGGVWKNTEDEILKAAVMKYGKNQWSRISLLVRKSAKQCKARWFEWLDPSIKKTEWTREEEKLLHLAKIMPTQWRTIPIIGRTSSQCLERYEKLLDAAQ                                                                                                                                                                                                                                                                                                                                                                                                                                                                                            |
|                                 | <i>Bigelowiella natans CCMP2755</i>     | estExt_fgenesh1_pg.C_630109          | Bn2R-MYB2  | SFEKAKRSWTQEEDTQLKALVVKYGPQRWSAIAKELPGRIGKQCRERWHNHLNPDVTKDAWTPPEEDMIIFEQHKRLGNQWAGIAKLLPGRDINAIAKNRYSTVRRLLV                                                                                                                                                                                                                                                                                                                                                                                                                                                                                       |
|                                 | <i>Bigelowiella natans CCMP2755</i>     | estExt_Genewise1.C_470048            | Bn2R-MYB3  | VPGRKMTWSDENAMLRVETYSKSWSVVAKLMPGRGTGKQCRERWTHLMPGLRKGPLTAEKQLFVHLKHGNRWTLIAKMMPGRTDNALKNYNSMKRTRD<br>MRRKWTQDQEDTLETLVKKHSAHWSLIAAGKMHRRSAAGCKRRWEQVLNVQVKKGRFTEEDKICKHVQENGATNWGLSFSMPQRTSVQCRTRWFEGLDPLRKKSPWSSQE<br>DRLICKYHGLGPRWSCIAEHVKGRTAKAIREHFMQSLQQR                                                                                                                                                                                                                                                                                                                                    |
|                                 | <i>Bigelowiella natans CCMP2755</i>     | gw1.5.185.1                          | Bn3R-MYB1  |                                                                                                                                                                                                                                                                                                                                                                                                                                                                                                                                                                                                     |
| Stramenopiles                   | <i>Aplanochytrium kerguelense PBS07</i> | estExt_fgenesh1_pg.C_70341           | Ak2R-MYB1  | EEGRSRGAWTKEEDDRLIQIVQEEGAKRWSAIAKRLTGRNSKQCRERWSNQINPALVRTKWLPEEDQTIKAHSTLGNRWALIAKLLPGRDINAIAKNRNFNGSLKVRM                                                                                                                                                                                                                                                                                                                                                                                                                                                                                        |
|                                 | <i>Aplanochytrium kerguelense PBS07</i> | e_gw1.25.266.1                       | Ak2R-MYB2  | RIMIKGGVWKNTEDEILKAAVMKYGKNHVARVASLLSRKSAKQCKARWHEWLDPSIKKTEWTREDEKLLHLAKLMPQWRTIPIVGRTPAQCLERYEKLLDMAQ<br>MRWSCEDDLLRKAVDIVGARNWKIRISREFMKGKRTDVQCLHRWQKVLPRGLKGPWTEEDDKTILRAIKSGMTKWSEIANQVPGRIGKQCRERWFNHLDPSEIKKGSWSKSEDK<br>ILYESHHKFGNRWCEIAKLLPGRSENAVKNRWNSVTRKQ<br>MLLALVDKFGAKNWSFIAAHLEGRTEIQCLQHWRNVLNPDLIKGSWTSEDELLRKTVERYGPKKCAVIAPNLPGRMGKQCRERWFNTLDPSEIKKGPWSAKEEETLKEAHAK<br>YGNKWSLISKLLPGRSNDIKNHFAHLRRTK<br>VPIRKSPPWSVEEDLLLKRAVIQKGPSRWTAVIAPLVPKTTAEQCKQHWECVLFQTLKGRGTWTDDEDEKLLSLVRLQSGKSWKEVAKQLPGRIGKQCRERWFLDPSLKKT<br>SWTVREKEQLRLHQEYGGKWSKIAKIPGRSDNSCKNCWNSMQHRTK |
|                                 | <i>Aplanochytrium kerguelense PBS07</i> | e_gw1.14.209.1                       | Ak3R-MYB1  | NSKLNKRQWSPDEGDGALELAVQTTRANWSAIARLLPGRGKQCRERWVNLSPA VNKAEWTEEDQLIFKTRDRIGNRWADIARLLPGRDINAIAKNRYSTVRRRG                                                                                                                                                                                                                                                                                                                                                                                                                                                                                           |
|                                 | <i>Aplanochytrium kerguelense PBS07</i> | e_gw1.19.197.1                       | Ak3R-MYB2  |                                                                                                                                                                                                                                                                                                                                                                                                                                                                                                                                                                                                     |
|                                 | <i>Aplanochytrium kerguelense PBS07</i> | estExt_Genewise1Plus.C_80210         | Ak3R-MYB3  |                                                                                                                                                                                                                                                                                                                                                                                                                                                                                                                                                                                                     |
|                                 | <i>Phytophthora sojae</i>               | gw1.8.4384.1                         | Ps2R-MYB1  | KERKPVCKWTEKEDLLMLKLVQKYGTRHWITIGTKLPGRNGKQCRERWHNQLDPAIRKEPWSPEERILRELHDKFGNKWAEIAKMLPGRDINAIAKNHWNSSKRRLK                                                                                                                                                                                                                                                                                                                                                                                                                                                                                         |
|                                 | <i>Phytophthora sojae</i>               | estExt_Genemark1.C_1_t10388          | Ps2R-MYB2  |                                                                                                                                                                                                                                                                                                                                                                                                                                                                                                                                                                                                     |
|                                 | <i>Phytophthora sojae</i>               | fgenesh1_pg.1_#_347                  | Ps2R-MYB3  | GSTYERRAWTRKEDDAIIRLVEEYGTGRWSVISDHLNGENHGTERTGKQCRTRWNLHLDPTIKKDPWTAEEEQIIEAQTRELGNKWAEISKLLPGRDINAIAKNHWYSSMRRTM                                                                                                                                                                                                                                                                                                                                                                                                                                                                                  |
|                                 | <i>Phytophthora sojae</i>               | estExt_fgenesh1_pm.C_2_t30351        | Ps2R-MYB4  | TDSNSKRPWTREENDKMLQVLKQYGAKRWSLIAHMLPGRVKGKQCRERWHNHLNPSVRKDAWTAEEYVIFECHKNVGNQWAEISKMLPGRDINAIAKNRYSTVRRMQ                                                                                                                                                                                                                                                                                                                                                                                                                                                                                         |
|                                 | <i>Phytophthora sojae</i>               | e_gw1.3.6293.1                       | Ps2R-MYB5  | MRIMIKGGVWKNTEDEILKAAVMKYGMNQWARVASLLSRKSAKQCKARWYEWLDPSEIKKTEWSREEEKLLHLAKLMPQWRTIPIVGRTPAQCLEHYERLLDAAQ                                                                                                                                                                                                                                                                                                                                                                                                                                                                                           |
|                                 | <i>Phytophthora sojae</i>               | fgenesh1_pm.8_#_308                  | Ps2R-MYB6  | GSAQPTKWLREDEDERLVAVARFGKKNWKMIAETLNGRDTDVQCLHRWNLVLPGLKGPWTEEDRILNLITRYGVGKIRWCDLALHLPGRIGKQCRERWCNHLDSRI<br>SLRRTPKRWTEEDAAALLKIETGGLREAAERGLPEVWIELADLLNNGRTNKQCRDRFQNLRTGKIKGNWTKEEIKLIEDMYKSFSGKSSIAQILTHRTEENDVKNKWYAMKR<br>VEE                                                                                                                                                                                                                                                                                                                                                               |
| <i>Phaeodactylum tricoratum</i> | fgenesh1_pg.C_chr_1000784               | Ptr2R-MYB1                           |            |                                                                                                                                                                                                                                                                                                                                                                                                                                                                                                                                                                                                     |
| Alveolata                       | <i>Plasmodium falciparum</i>            | XP_001347611.1                       | Pf2R-MYB1  | RIQIKGGIWKNCEDVLAAMKYGLNNWSRVASLLVRKSAKQCKARWYEWLDPSEIKKTEWNEKEEELKLLHLAKLFPQWRTIPIVGRTPAQCLEHYEYLLDEAE                                                                                                                                                                                                                                                                                                                                                                                                                                                                                             |
|                                 | <i>Tetrahymena thermophila</i>          | XP_001019592.1                       | Tth2R-MYB1 | SFKCKKRPWSEEDLLVIKLVKEHGPQKWTFIATHLEGRIGKQCRERWHNHLNPNKIKCSWSEEEVWLYLFHKGIGNKWAEIAKYIIGRTDINSIKNHWNSSGMMKRL                                                                                                                                                                                                                                                                                                                                                                                                                                                                                         |
|                                 | <i>Tetrahymena thermophila</i>          | XP_001019508.1                       | Tth2R-MYB2 | SSKAKKMPWSEEDKLVIRLVEQHGPQKWTFAHQHIPGRIGKQCRERWHNHLNPNKINKEPBGDDEEWVLFCHKLKGNKWAETQYLPGRDINAIAKNHWNSSMKKRI                                                                                                                                                                                                                                                                                                                                                                                                                                                                                          |
|                                 | <i>Tetrahymena thermophila</i>          | XP_001017510.1                       | Tth2R-MYB3 | MISKTSKGGPWSFEDDNKLLDWVKANGPQKWSLCSSETIPGRSGKQCRERWFNLLNPNVKKGNWTAEEDMIFQGYLQHGSSWSRIAKNLEGRTEENSVKNRFYSTVTRKLL                                                                                                                                                                                                                                                                                                                                                                                                                                                                                     |
|                                 | <i>Tetrahymena thermophila</i>          | XP_001027756.2                       | Tth2R-MYB4 | GVWKNVEDEILKAAVMKYGLNQWSRISLLIRKSAKQCKARWYEWLDPQIKKTEWTREDEKLLHLAKIFPCQWRTIAPLVNRTPNQCVERYERLLDIAQ                                                                                                                                                                                                                                                                                                                                                                                                                                                                                                  |
| Cryptophyta                     | <i>Guillardia theta CCMP27</i>          | e_gw1.65.33.1                        | Gi2R-MYB1  | MNQKNGQKAPWTEPEDEEVRKLVKDHGDKSWLVLVASFPLNRTGKQIRERWHNQLDPNIMKGPWTEEDMLIMEAQKIHGKNWAEIAKLVPGRTDINAIAKNRWNSTIRKRM                                                                                                                                                                                                                                                                                                                                                                                                                                                                                     |
|                                 | <i>Guillardia theta CCMP27</i>          | estExt_fgenesh2_pg.C_680082          | Gi2R-MYB2  | MRIMIKGGVWKNTEDEILKAAVMKYGKNQWSRIASLLSRKSAKQCKARWYEWLDPSEIKKTEWTREDEKLLHLAKIMPTQWRTIPIVGRTPAQCLERYEKLLDEAM                                                                                                                                                                                                                                                                                                                                                                                                                                                                                          |
|                                 | <i>Guillardia theta CCMP27</i>          | e_gw1.48.74.1                        | Gi2R-MYB3  | MGRLLKDKSVCRGWTEEDNLIRSLVEKYEGTSWKEVAEYIPRRTGKQIRERWHNMLDPNIKSSWTRREEVILFHAHA VYGNRWAEIAKLLPGRDINAIAKNHFNRSLLPHR                                                                                                                                                                                                                                                                                                                                                                                                                                                                                    |
|                                 | <i>Guillardia theta CCMP27</i>          | fgenesh2_pm.63_#_2                   | Gi2R-MYB4  | MWTKEEDTVIRLVELYGPTRWASIASNLPGRNGKQCRERWHNQLDPAIKKESWTEEDRILMQAHAEGLSAWVEISKRLPGRDINAIAKNRWNSSMSE                                                                                                                                                                                                                                                                                                                                                                                                                                                                                                   |
|                                 | <i>Guillardia theta CCMP27</i>          | e_gw1.20.104.1                       | Gi2R-MYB5  | KQTTVKGPGWGDDEDDVIRLVGQYGPKRWSLIASNLPGRGTGKQCRERWHNQLDPNIKREWTEEDRILDAHKKASSLLAFGNHWVGISKLLPGRDINAIAKNRWNSTMSKMN                                                                                                                                                                                                                                                                                                                                                                                                                                                                                    |
|                                 | <i>Guillardia theta CCMP27</i>          | au.8_g2874                           | Gi2R-MYB6  | SNADNRRPWSQEEDDLIVQLVKEHGLRKAIVASQLKGRSGKQCRERYKNQLDPSIRKDPWTDEEDKICIAQSFGNRWTEIAKFLPGRDINSIKNHWYSTLQRKS<br>AVRGSKAKWTAEDSRLAALVDQFHAKNWKKIAERMEGRTDVQCLHRWQKVLNPNLVKGPWTKEEDRTVIELVSHQGPKKWSLIAHLPGRIGKQCRERWHNHLNPDIKKEE<br>WTPLEDSIIIIHHRVYGTWAKIAALLPGRDINAIAKNHWNSTMKRR                                                                                                                                                                                                                                                                                                                        |
|                                 | <i>Guillardia theta CCMP27</i>          | e_gw1.7.354.1                        | Gi3R-MYB1  |                                                                                                                                                                                                                                                                                                                                                                                                                                                                                                                                                                                                     |

|                                 |                                       |                    |                                                                                                         |                                                                                                                                                                                                                                                                           |
|---------------------------------|---------------------------------------|--------------------|---------------------------------------------------------------------------------------------------------|---------------------------------------------------------------------------------------------------------------------------------------------------------------------------------------------------------------------------------------------------------------------------|
| Rhodophyta                      | <i>Cyanidioschyzon merolae</i>        | CMJ282C            | Cm2R-MYB1                                                                                               | SVAHVKGWPWTPAEDALLSLVAQFGIQAWTA AACMPGRSGKQCRERWLNQLDPSVRRGAWTFEDEALVLLHARFGNCWAKMSKYLPGRTDNAIKNRWNSSMHRRW                                                                                                                                                                |
|                                 | <i>Cyanidioschyzon merolae</i>        | CMK280C            | Cm2R-MYB2                                                                                               | PSVNGRGPWQPCEDERLKVNLGAVWPRIAQYMNRSKQCRERYINNLAPGIVKTEWTRNEEMRLVQLQAIYGNRWSVIAKEFPGRTDNAVKNRNFNSYLRRLE                                                                                                                                                                    |
|                                 | <i>Cyanidioschyzon merolae</i>        | CMQ253C            | Cm2R-MYB3                                                                                               | ERKEVKGWPWRPEDELLRSLVEKMGPRRWSLIAEHIPGRTGKQARERWLNQLSPQICKRPWTPEEDRIISAHARLGNRWSEIARMLQGRTDNAVKNRNFNSFIRRAQ                                                                                                                                                               |
|                                 | <i>Cyanidioschyzon merolae</i>        | CMR098C            | Cm2R-MYB4                                                                                               | FHLRSSDWSLPEELVLRAAVEVCGTNQWRRIASLLPGKTALQCEHFYSSADPSLKGGGNWTQVEDRLLQVGRSLVGGWQTVALLLPGRADACAQRFAELTRVLDASS<br>WPASDDALLREKIQQCPMDWNQVALAFQGYTASECSQRWRQLAGRRHLKGAWSPPEEDARIIDLQKLGKESWSRLATFLEGRTGKQCRERWFHHLAPGVNKAPWTEEEERI<br>LREKHAIEFGNRWAMIARFLPGRSDNTIKNHWNMTMRER |
|                                 | <i>Cyanidioschyzon merolae</i>        | CMT134C            | Cm3R-MYB1                                                                                               |                                                                                                                                                                                                                                                                           |
| Chlorophyta                     | <i>Chlamydomonas reinhardtii</i> v5.5 | g16135.t1          | Cr2R-MYB01                                                                                              | AQGEKRGWPTEEDKQLTDLVLSGCAQRWSTIAESIPGRSGKSCRLRWVNLSPQVKKGPFSDFEADAVIVRSHEKYGNKWSVIAKLLPGRTDNAVKNRWNSLTKRKH                                                                                                                                                                |
|                                 | <i>Chlamydomonas reinhardtii</i> v5.5 | Cre02.g108350.t1.2 | Cr2R-MYB02                                                                                              | QSRTPYKAWSKKEEDLLRALVDRHGANKWTEIAASLPGRTGKSCRLRWVNLQRLGDLVMGAFSPAEDQRIVELQATLGNRWSAIAKELPGRTDNMKNRWNSYLKRRL                                                                                                                                                               |
|                                 | <i>Chlamydomonas reinhardtii</i> v5.5 | g9909.t1           | Cr2R-MYB03                                                                                              | GDDIKKGAWTPEEDALLTKLIATYGTKNWSVVAAGIKGRSGKSCRLRWVNLQNPVKKPEFSEWEDAVIILAHEVHGKWAIAIKLLSGRTDNSVKNHWNATLKRKV<br>HPTAKLKGWSPEEDALLTRLVKKFGEKNWSPIARALNEATGKTEATGRIGKQCRERWNHHLSPGLRKPDPWTPEEEVLVDAHKRLGNRWSDIARCIPGRSENAVKNHWNATL<br>RKR                                      |
|                                 | <i>Chlamydomonas reinhardtii</i> v5.5 | Cre01.g034350.t1.3 | Cr2R-MYB04                                                                                              |                                                                                                                                                                                                                                                                           |
|                                 | <i>Chlamydomonas reinhardtii</i> v5.5 | Cre03.g197100.t1.2 | Cr2R-MYB05                                                                                              | KGGWSAVEDTTLKRLVEEFEGENWSVIARHLNASLKGPSDSGRIGKQCRERYNHHLRPDIKKDAWTEEEESLVA AHLRYGNRWSIAKLVIRGRTENAVKNHWNATLRRKD                                                                                                                                                           |
|                                 | <i>Chlamydomonas reinhardtii</i> v5.5 | Cre14.g621050.t1.3 | Cr2R-MYB06                                                                                              | YDDQGGPWTAEEDAVLKSIAQRGPRQWTRIAENIPGRSGKSCRLRWLNQLSPALKTSPWEPQEDAVILWAHLHYRNRWCEIAKHLPGRTDNHIKNRWNCTLKKRL                                                                                                                                                                 |
|                                 | <i>Chlamydomonas reinhardtii</i> v5.5 | Cre07.g345350.t1.3 | Cr2R-MYB07                                                                                              | MTQGRNWTSAIASCIPGRSGKSCRLRWLNQLSPA VKSGPFAEEDAVILWAHMVYGNKWASIAKHLPGRTDNHIKNRWNCTLKKKH                                                                                                                                                                                    |
|                                 | <i>Chlamydomonas reinhardtii</i> v5.5 | Cre03.g149200.t1.3 | Cr2R-MYB08                                                                                              | KAPKQSRKWSAAEIDAVLKAVALGSSDEINWVEVAKSVPTRSNGQCREKWRNDRPDISKEPSSREEYIVCRVHCQVGNQWADIARFLPGAENSINKHYNATLRSKA                                                                                                                                                                |
|                                 | <i>Chlamydomonas reinhardtii</i> v5.5 | Cre02.g103450.t1.3 | Cr2R-MYB09                                                                                              | MPLTATWTDQEDTLRKLKEYGPKKWSVIAQKLTGKSGKQCRRRWKNYLNADLKS GGWTAEDRILMEGHRLYGNKWTEIAKMGVGRTDNAVKNRYAALCKRDM                                                                                                                                                                   |
|                                 | <i>Chlamydomonas reinhardtii</i> v5.5 | g2901.t1           | Cr2R-MYB10                                                                                              | KRKEASRPWTQEETDWLITVVSRLGTDNYDAINWQEVARQVPGRTGKQCREKWKNDLRPNISKDPWSLKEEYVLALAHSLHGNRWSEVARYLPTRPENTIKNRWYATNRAKA                                                                                                                                                          |
|                                 | <i>Chlamydomonas reinhardtii</i> v5.5 | Cre03.g197350.t1.2 | Cr2R-MYB11                                                                                              | RIMIKGGVWKNTEDEILKAAVMKYGLNQWARISSLLVRKSAKQCKARWYEWLDPAIKTEWTRREEDEKLLHLAKLMPQWRTIPIVGRTPAQCLDRYERLLDQAV                                                                                                                                                                  |
|                                 | <i>Volvox carteri</i> v2.0            | Vocar20002419m     | Vc2R-MYB1                                                                                               | GEDNSKGPWTEPEDEVLRGLVVTGHARNWTKIAECIPGRSGKSCRLRWLNQLSPHVRGGPFTPEEDAVILWAHLQYGNKWASISKHLPGRTDNHIKNRWNCTLKKRY                                                                                                                                                               |
|                                 | <i>Volvox carteri</i> v2.0            | Vocar20005463m     | Vc2R-MYB2                                                                                               | DDDVTKGPWTEPEEDTILRQLVMSQGRNWTSAIACIPGRSGKSCRLRWLNQLSPVSKGPFSAEEDAVILWAHMVYGNKWASIAKHLPGRTDNHIKNRWNCTLKKKH<br>PIAKQKGGWTAEEEDAHLARLVLEYGEGNWSPIARALNVLKMPNSTGRIGKQCRERWNHHLSPGLRKGVPWGPPEEILLADAHRLGNKWSDIARCIPGRSENAVKNHWNATLR<br>KRL                                    |
|                                 | <i>Volvox carteri</i> v2.0            | Vocar20009071m     | Vc2R-MYB3                                                                                               | AKVKGWTVNVEDQILKRLVDFEGENWSVIARHLNSALGKPAESGRIGKQCRERYNHHLRPDIKKDAWTEEEEALLVSAHLKFGNRWSIAKVIKGRTENAVKNHWNATLRRK<br>D                                                                                                                                                      |
|                                 | <i>Volvox carteri</i> v2.0            | Vocar20005479m     | Vc2R-MYB4                                                                                               |                                                                                                                                                                                                                                                                           |
|                                 | <i>Volvox carteri</i> v2.0            | Vocar20001155m     | Vc2R-MYB5                                                                                               | MAQWSAHEDEQLRKLKEYGPKRWSVIAKLTGKSGKQCRRRWKNHLNADLKS GGWTAEDRILLEGHRLYGNKWTEIAKMGVGRTDNAVKNRYAALCKRDA                                                                                                                                                                      |
|                                 | <i>Volvox carteri</i> v2.0            | Vocar20010663m     | Vc2R-MYB6                                                                                               | MALKTAWTESEDALLRQLVEEKPKNWGLIAAQIKTKSGKQCRRRWTFNLNADLKTGGWTPQEDNLMEGHKMHGNKWTEIAKMGVGRTDNAVKNR                                                                                                                                                                            |
|                                 | <i>Volvox carteri</i> v2.0            | Vocar20005710m     | Vc2R-MYB7                                                                                               | MIKGGVWKNTEDEILKAAVMKYGLNQWARISSLLVRKSAKQCKARWYEWLDPISIKTEWTRREEDEKLLHLAKLMPQWRTIPIVGRTPAQCLDRYERLLDQAV                                                                                                                                                                   |
|                                 | <i>Micromonas pusilla</i> RCC299      | 113455             | Mp2R-MYB1                                                                                               | STKSRSRWLPSEDELVRALVAHQGRKWTLSARLTKTKQVYARWRDYLQPLTTKPSKEEQAKLVELQGHVGNQWAVLARLMPGRSPNAIKNRFHATKRKME                                                                                                                                                                      |
|                                 | <i>Micromonas pusilla</i> RCC299      | 92928              | Mp2R-MYB2                                                                                               | MRILKGGVWKNTEDEILKAAVMKYGKNQWARISSLLVRKSAKQCKARWYEWLDPISIKTEWTRQEDEKLLHLAKLMPTQWRTVAPIVGRTPAQCLERYEKLDAAC                                                                                                                                                                 |
| <i>Ostreococcus lucimarinus</i> | 31513                                 | OI2R-MYB1          | IQIKGGVWKNTEDEILKAAVMKYGKNQWPRIASLLNRKSAKQCKARWFEWLDPSIKTEWTRREEDEKLLHLAKLMPTQWRTIPIVGRTPSQCLERYEKLDAAC |                                                                                                                                                                                                                                                                           |
| Bryophyta                       | <i>Physcomitrella patens</i> V6.1     | Pp1s6_416V6.1      | Pp2R-MYB01                                                                                              | EGGIYKGPWTEAEDTTL SAIYKAHGEENWRLLPKCAGLSRCGKSCRLRWLNLYRPLGKKGKFSWDEEDLIVTLHALLGNRWSLIAGRIPGRTDNEIKNYWNTHLSRKL                                                                                                                                                             |
|                                 | <i>Physcomitrella patens</i> V6.1     | Pp1s61_196V6.1     | Pp2R-MYB02                                                                                              | GEGLNKGWPWTAEDSILTA FVRANGEGNWRILPKRAGLKRCKSCRLRWVNLQRLGDLVMGAFSPAEDQRIVELQATLGNRWSAIAKELPGRTDNMKNRWNSYLKRRL                                                                                                                                                              |
|                                 | <i>Physcomitrella patens</i> V6.1     | Pp1s1_78V6.1       | Pp2R-MYB03                                                                                              | ECGLKKGWPWTEDEQKLLAYIQNHGHGWSRSLPLNAGLQRCGKSCRLRWVNLQRLGDLVMGAFSPAEDQRIVELQATLGNRWSAIAKELPGRTDNMKNRWNSYLKRRL                                                                                                                                                              |
|                                 | <i>Physcomitrella patens</i> V6.1     | Pp1s10_267V6.1     | Pp2R-MYB04                                                                                              | EFDRIKGPWSPEEDAALQQLVEKYGARNWSLSKIGIPGRSGKSCRLRWVNLQRLGDLVMGAFSPAEDQRIVELQATLGNRWSAIAKELPGRTDNMKNRWNSYLKRRL                                                                                                                                                               |
|                                 | <i>Physcomitrella patens</i> V6.1     | Pp1s103_56V6.1     | Pp2R-MYB05                                                                                              | RPHIHKQWTPPEEDRYLVELVERHGQQRWLSIATQLTGRIGKQCRERWNHHLRPDIKRDGWNTHEEEALVSAHNKLGNRWADIAMIPGRTENAVKNHWNATMRRKD                                                                                                                                                                |
|                                 | <i>Physcomitrella patens</i> V6.1     | Pp1s106_216V6.1    | Pp2R-MYB06                                                                                              | RMSVKKGPWTEPEEQKLVAYIQEHGHGWSRELPEKAGLARGKSCRLRWVNLQRLGDLVMGAFSPAEDQRIVELQATLGNRWSAIAKELPGRTDNMKNRWNSYLKRRL                                                                                                                                                               |
|                                 | <i>Physcomitrella patens</i> V6.1     | Pp1s106_224V6.1    | Pp2R-MYB07                                                                                              | KMGLKKGWPWTEPEEQKLVAYIQEHGHGWSRELPEKAGLARGKSCRLRWVNLQRLGDLVMGAFSPAEDQRIVELQATLGNRWSAIAKELPGRTDNMKNRWNSYLKRRL                                                                                                                                                              |
|                                 | <i>Physcomitrella patens</i> V6.1     | Pp1s114_136V6.1    | Pp2R-MYB08                                                                                              | DEVLRKGPWTEPEEQKLVAYIQEHGHGWSRELPEKAGLARGKSCRLRWVNLQRLGDLVMGAFSPAEDQRIVELQATLGNRWSAIAKELPGRTDNMKNRWNSYLKRRL                                                                                                                                                               |
|                                 | <i>Physcomitrella patens</i> V6.1     | Pp1s133_87V6.1     | Pp2R-MYB09                                                                                              | TDPVSKGPWTEAEDKILTECVKEYGDRCWQRPKHGGLRDGKSCRLRWVNLQRLGDLVMGAFSPAEDQRIVELQATLGNRWSAIAKELPGRTDNMKNRWNSYLKRRL                                                                                                                                                                |
|                                 | <i>Physcomitrella patens</i> V6.1     | Pp1s141_40V6.1     | Pp2R-MYB10                                                                                              | YEDVRKGAWTAEEDEKLRKHVETYGTGHWSVGLKAGLQRCGKSCRLRWVNLQRLGDLVMGAFSPAEDQRIVELQATLGNRWSAIAKELPGRTDNMKNRWNSYLKRRL                                                                                                                                                               |
|                                 | <i>Physcomitrella patens</i> V6.1     | Pp1s149_164V6.1    | Pp2R-MYB11                                                                                              | KQKLLKGLWSPPEDEKL VRYVTKHGHGCSVVPKQAGLQRCGKSCRLRWVNLQRLGDLVMGAFSPAEDQRIVELQATLGNRWSAIAKELPGRTDNMKNRWNSYLKRRL                                                                                                                                                              |
|                                 | <i>Physcomitrella patens</i> V6.1     | Pp1s151_41V6.1     | Pp2R-MYB12                                                                                              | SKLCPGRWRPAKDEKLRELSQYRPNWLSIAEKLHGKSCRLRWVNLQRLGDLVMGAFSPAEDQRIVELQATLGNRWSAIAKELPGRTDNMKNRWNSYLKRRL                                                                                                                                                                     |
|                                 | <i>Physcomitrella patens</i> V6.1     | Pp1s16_281V6.1     | Pp2R-MYB13                                                                                              | DEVLRKGPWTEPEEQKLVAYIQEHGHGWSRELPEKAGLARGKSCRLRWVNLQRLGDLVMGAFSPAEDQRIVELQATLGNRWSAIAKELPGRTDNMKNRWNSYLKRRL                                                                                                                                                               |
|                                 | <i>Physcomitrella patens</i> V6.1     | Pp1s186_70V6.1     | Pp2R-MYB14                                                                                              | PNIHKQWSPPEEDRYLVELVERHGQQRWLSIATQLTGRIGKQCRERWNHHLRPDIKRDGWNTHEEEALVSAHNKLGNRWADIAMIPGRTENAVKNHWNATMRRKD                                                                                                                                                                 |
|                                 | <i>Physcomitrella patens</i> V6.1     | Pp1s189_29V6.1     | Pp2R-MYB15                                                                                              | KQKLLKGLWSPPEDEKL VRYVTKHGHGCSVVPKQAGLQRCGKSCRLRWVNLQRLGDLVMGAFSPAEDQRIVELQATLGNRWSAIAKELPGRTDNMKNRWNSYLKRRL                                                                                                                                                              |
|                                 | <i>Physcomitrella patens</i> V6.1     | Pp1s2_283V6.1      | Pp2R-MYB16                                                                                              | SKQCPRGHWRPAEDDKLRELSQYRPNWLSIAEKLHGKSCRLRWVNLQRLGDLVMGAFSPAEDQRIVELQATLGNRWSAIAKELPGRTDNMKNRWNSYLKRRL                                                                                                                                                                    |
|                                 | <i>Physcomitrella patens</i> V6.1     | Pp1s2_55V6.1       | Pp2R-MYB17                                                                                              | EAGLRKGPWTEPEEQKLVAYIQEHGHGWSRELPEKAGLARGKSCRLRWVNLQRLGDLVMGAFSPAEDQRIVELQATLGNRWSAIAKELPGRTDNMKNRWNSYLKRRL                                                                                                                                                               |
|                                 | <i>Physcomitrella patens</i> V6.1     | Pp1s2_60V6.1       | Pp2R-MYB18                                                                                              | QEGLKKGWPWTEPEEQKLVAYIQEHGHGWSRELPLNAGLQRCGKSCRLRWVNLQRLGDLVMGAFSPAEDQRIVELQATLGNRWSAIAKELPGRTDNMKNRWNSYLKRRL                                                                                                                                                             |

|                                   |                 |            |                                                                                                                                                                                                                                                                                 |
|-----------------------------------|-----------------|------------|---------------------------------------------------------------------------------------------------------------------------------------------------------------------------------------------------------------------------------------------------------------------------------|
| <i>Physcomitrella patens</i> V6.1 | Pp1s200_41V6.1  | Pp2R-MYB19 | SKLCPRGHWRAEDDKLRELVSQYGPQNWNLIAEKLQGRSGKSCRLRWFNQDPRINRRPFTTEEEEDRLLAAHRFHGNKWAMIARLFPGRTDNAVKNHWHVVMARKF                                                                                                                                                                      |
| <i>Physcomitrella patens</i> V6.1 | Pp1s204_13V6.1  | Pp2R-MYB20 | NEDVRKGAWAAEEDKLRKYVETYGTHWRSVGGKAGLQRCGKSCRLRWNYLRPDIRHGSFTQEEENLIVKLHAAHGSRWLSIAAQMPPGRTDNDIKNHNWTRLKKKL                                                                                                                                                                      |
| <i>Physcomitrella patens</i> V6.1 | Pp1s206_27V6.1  | Pp2R-MYB21 | RQPGMKGQWGAAEDRVLRLKLVKQYGSRRWLSLTFMANRSGKQCRERWVNHLPDIRKEGWTTEEEELVHAHSTFGNRSWAIKMLPGRTDNSIKNHWHATLRKKD                                                                                                                                                                        |
| <i>Physcomitrella patens</i> V6.1 | Pp1s211_139V6.1 | Pp2R-MYB22 | KQKLKKGWSPEEDKLVRYITQHGHCWCSAVPKQAGLQRCGKSCRLRWNYLRPDLKRGVFSATEESLIIDWHAALGNRSQIATQLPGRTDNEIKNFWNSCIKKKL                                                                                                                                                                        |
| <i>Physcomitrella patens</i> V6.1 | Pp1s219_84V6.1  | Pp2R-MYB23 | SKLCPRGHWRAEEDKLRRELVSQYGPQNWNLIAEKLHGRSGKSCRLRWFNQDPRINRRPFTTEEEERLLAAHSHFHNKWAMIARLFLGRTDNAVKNHWHVVMARKF                                                                                                                                                                      |
| <i>Physcomitrella patens</i> V6.1 | Pp1s238_70V6.1  | Pp2R-MYB24 | GGALKKGPWTSAEDESILISYVTKHGEWNWSVQKHSGLFRGKSCRLRWANHLRPNLKKGAFTPEEERIIIVELHAKIGNKWARMQAQNFQ                                                                                                                                                                                      |
| <i>Physcomitrella patens</i> V6.1 | Pp1s24_48V6.1   | Pp2R-MYB25 | KQKLKKGWSPEEEDKLVRYISKHGHGCWCSAVPKQAGLQRCGKSCRLRWNYLRPDLKRGVFSAAEENLIIDLHVLGNRSQIATQLPGRTDNEIKNFWNSCIKKKL                                                                                                                                                                       |
| <i>Physcomitrella patens</i> V6.1 | Pp1s257_83V6.1  | Pp2R-MYB26 | NDTVKRGPWTPPEEDKLVTVIAQYAGSWRTPKRALRRCGKSCRLRWNYLRPDLKHGRFSEYEEQLIVHLHATLGRWSLIAAQLPGRTDNDVKNYWNSRLKRL                                                                                                                                                                          |
| <i>Physcomitrella patens</i> V6.1 | Pp1s277_14V6.1  | Pp2R-MYB27 | KQKLKKGWSPEEEDKLVRFITKHGHGCWCSAVPKQAGLQRCGKSCRLRWNYLRPDLKRGVFSAAEENLIIDLHVLGNRSQIATQLPGRTDNEIKNFWNSCIKKKL                                                                                                                                                                       |
| <i>Physcomitrella patens</i> V6.1 | Pp1s284_57V6.1  | Pp2R-MYB28 | SEDVRKGAWAAEEDKLRKYVETYGTHWRSVGGKAGLRRCGKSCRLRWNYLRPDIRHGSFTQEEEDLIVKLHAAHGSRWLSIAAQMPPGRTDNDIKNHNWTRLKKKL                                                                                                                                                                      |
| <i>Physcomitrella patens</i> V6.1 | Pp1s295_52V6.1  | Pp2R-MYB29 | INDVRKGAWGADEDEKLRKYVEKYGTGHWRSVGGKAGLQRCGKSCRLRWNYLRPDIRHGSFSEEEEDLIVKLHTSHGSRWSLIAAQLPGRTDNDIKNHNWTRLKKKL                                                                                                                                                                     |
| <i>Physcomitrella patens</i> V6.1 | Pp1s313_81V6.1  | Pp2R-MYB30 | RQNTIKGLWTIEEDRHLIELVKRYGQQRWTLIANYLGRIGKQCRERWHNHLRPDIKKEGWSSEEEYLVFVHNTLGNRWADIAPGRTEAIKNHNWTRMRRKD                                                                                                                                                                           |
| <i>Physcomitrella patens</i> V6.1 | Pp1s317_55V6.1  | Pp2R-MYB31 | KMGLKKGWTPDEDQKLVYIQRNGHGSWRALPKHAGLLRCGKSCRLRWNYLRPDIKGRGFSFEEQVIIHLHGILGNRSWAIAAHLPGRTDNEIKNYWNTHLRRL                                                                                                                                                                         |
| <i>Physcomitrella patens</i> V6.1 | Pp1s326_37V6.1  | Pp2R-MYB32 | KLSLKKGPWTPDEDQKLVAYIQEHGHGSWRALPEKAGLARCAGKSCRLRWNYLRPDIKGRGFSHEEDQMIIQLHAILGNRSWAIAGHLPRQTDNEIKNYWNTHLKRL                                                                                                                                                                     |
| <i>Physcomitrella patens</i> V6.1 | Pp1s36_198V6.1  | Pp2R-MYB33 | KDSVVRGPWTPPEEDAKLLACIAQHGTGWSRTPKAGLQRCGKSCRLRWNYLRPDLKHGRFTDHEEQLVNLHAAALGSRASFLVQPASASGHIGSRTRLSIRVKTLLDASYFPRI<br>CIFREYVYEAEIFSRWSLIAAQLPGRTDNDVKNYWNTL                                                                                                                    |
| <i>Physcomitrella patens</i> V6.1 | Pp1s371_6V6.1   | Pp2R-MYB34 | EEGFYKGPWTEEDAILAFIKADGEGNWRTPKRSGLKRCRKSCLRWNYLRPDLRGNFSPEEDELIIKLSLLENRSWIAAGRIAPGRKDNEIKNYWNSRLRRRL                                                                                                                                                                          |
| <i>Physcomitrella patens</i> V6.1 | Pp1s389_40V6.1  | Pp2R-MYB35 | KEVLKKGWTPDEDQKLVAYIQEHGHGSWRSLPINAGLQRCGKSCRLRWNYLRPDIKGRGFSHEEDQMIVHLHAILGNRSWAIASHLPRRTDNEIKNYWNTHLKRL                                                                                                                                                                       |
| <i>Physcomitrella patens</i> V6.1 | Pp1s389_41V6.1  | Pp2R-MYB36 | EGTLRKGWTPDEDQKLVAYIQEHGHGSWRVLPKNAGLTRCGKSCRLRWNYLRPDIKGRGFSAEEDQTVIHLHSLVGNRSWIAAHLPRRTDNEIKNYWNTHLKRL                                                                                                                                                                        |
| <i>Physcomitrella patens</i> V6.1 | Pp1s39_301V6.1  | Pp2R-MYB37 | SKLCSRGHWRPVEDQKLRVSLHGPQNWNLIAEKLQGRSGKSCRLRWFNQDPRINRRPFTTEEEERLLAANQLQGNKWAIALRFPGRTDNAVKNHWHVLTARKM                                                                                                                                                                         |
| <i>Physcomitrella patens</i> V6.1 | Pp1s420_4V6.1   | Pp2R-MYB38 | KVGLRRGPWTEEDQKLVSHITNGLSCWRAIPKLAGLLRCGKSCRLRWNYLRPDLKRGVFSAAEENLIIDLHATLGNRSWIAAQLPGRTDNEIKNYWNTLKKKL                                                                                                                                                                         |
| <i>Physcomitrella patens</i> V6.1 | Pp1s433_19V6.1  | Pp2R-MYB39 | KVGLKRGWAADEDKLVSYINAHGVSCWRAIPKLAGLLRCGKSCRLRWNYLRPDLKRGVFTDAEENLIIDLHATLGNRSWIAAQLPGRTDNEIKNYWNTLKKKL                                                                                                                                                                         |
| <i>Physcomitrella patens</i> V6.1 | Pp1s45_150V6.1  | Pp2R-MYB40 | DASLKKGPWTPDEDQKLVAYIQKHGHGSWRSLPLHAGLQRCGKSCRLRWNYLRPDIKGRGFSQEEEDQMIVHLHAILGNRSWAIASHLPRRTDNEIKNYWNTHLKRL                                                                                                                                                                     |
| <i>Physcomitrella patens</i> V6.1 | Pp1s46_302V6.1  | Pp2R-MYB41 | NEDVRKGAWAAEEDKLRKYVETHGTGHWRSVGGKAGLQRCGKSCRLRWNYLRPDIRHGSFDPPEEEDLIVKLHAAHGSRWLSIAAQMPPGRTDNDIKNHNWTRLKKKL                                                                                                                                                                    |
| <i>Physcomitrella patens</i> V6.1 | Pp1s53_216V6.1  | Pp2R-MYB42 | TDDRIGPWSPEEDVVLNRLVEKFGARNWSLIARGIPGRSGKSCRLRWNYLRPDLKRGVFSAAEENLIIDLHATLGNRSWIAAQLPGRTDNAIKNHNWNTLRRKH                                                                                                                                                                        |
| <i>Physcomitrella patens</i> V6.1 | Pp1s641_1V6.1   | Pp2R-MYB43 | RIMIKGGVWKNTEDEILKAAVMKYGKNQWARISLLVRSKAKQCKARWYEWLDPISIKTEWTRREEDEKLLHLAKLMPTQWRTISPIVGRTPAQCLERYEKLDAAC                                                                                                                                                                       |
| <i>Physcomitrella patens</i> V6.1 | Pp1s65_211V6.1  | Pp2R-MYB44 | KDSVVRGPWTPPEEDAKLLACIAQHGTGWSRTPKAGLQRCGKSCRLRWNYLRPDLKHGRFTDHEEQLVNLHAAALGSRWSLIAAQLPGRTDNDVKNYWNTLKKKL                                                                                                                                                                       |
| <i>Physcomitrella patens</i> V6.1 | Pp1s65_233V6.1  | Pp2R-MYB45 | DPPTAFSEQEDDILRELVKRHGTTKWHIISKMKKTPRECRKRWRTYLHMCNKSWSAEEDHLLQGHNAFGNRWTEIAKMVPGRTDNAVKNRYNACTKRS                                                                                                                                                                              |
| <i>Physcomitrella patens</i> V6.1 | Pp1s66_200V6.1  | Pp2R-MYB46 | GGSLKKGWTSAEDESILISYVTKHGEWNWSVQKHSGLFRGKSCRLRWANHLRPNLKKGAFTPEEERTIVELHAKLGNKWARMQAQNFQ                                                                                                                                                                                        |
| <i>Physcomitrella patens</i> V6.1 | Pp1s72_143V6.1  | Pp2R-MYB47 | TDDRIGPWSPEEDVVLNRLVEKFGARNWSLIARGIPGRSGKSCRLRWNYLRPDLKRGVFSAAEENLIIDLHATLGNRSWIAAQLPGRTDNAIKNHNWNTLRRKH                                                                                                                                                                        |
| <i>Physcomitrella patens</i> V6.1 | Pp1s74_264V6.1  | Pp2R-MYB48 | SKKCPRGHWRAEEDENLRKLVSRFGPQNWNLIAEKLHGRSGKSCRLRWFNQDPRINRRPFTDDEEERLLAAHRFHGNKWAMIARLFPGRTDNAVKNHWHVVMARKF                                                                                                                                                                      |
| <i>Physcomitrella patens</i> V6.1 | Pp1s76_66V6.1   | Pp2R-MYB49 | SKLCPRGHWRAEEDDKLRELVSQYGPQNWNLIAEKLHGRSGKSCRLRWFNQDPRINRRPFTTEEEEDRLLAAHRFHGNKWAMIARLFPGRTDNAVKNHWHVVMARKF                                                                                                                                                                     |
| <i>Physcomitrella patens</i> V6.1 | Pp1s78_152V6.1  | Pp2R-MYB50 | KAGLKRGPWTEEDQKLVSYITNGLGCWRATPKLAGLLRCGKSCRLRWNYLRPDLKRGVFSAAEENLIIDLHATLGNRSWIAAQLPGRTDNEIKNYWNTLKKKL                                                                                                                                                                         |
| <i>Physcomitrella patens</i> V6.1 | Pp1s91_13V6.1   | Pp2R-MYB51 | SKLCPRGHWRAEEDKLRRELVSQYGPQNWNLIAEKLHGRSGKSCRLRWFNQDPRINRRPFTTEEEERLLAAHRFHGNKWAMIARLFPGRTDNAVKNHWHVVMARKF<br>TRRSSKGGWTPPEEDTLRRAVQCFNGKNWKKIAEFFTDRTDVQCLHRWQVLPDLVKGAWTKEEDDRIMELVNKYGAKKWSVIAQNLPRIGKQCRERWHNHLNPSIKREA<br>WTQQEDLALIRAHQLYGNKWAIEIAKFLPGRTDNSIKNHNWNTMCKKV |
| <i>Physcomitrella patens</i> V6.1 | Pp1s36_43V6.1   | Pp3R-MYB1  | TRRSSKGGWTPPEEDTLRRAVQCFNGKNWKKIAEFFTDRTDVQCLHRWQVLPDLVKGAWTKEEDDRIMELVNKYGAKKWSVIAQNLPRIGKQCRERWHNHLNPSIKREA<br>WTQQEDLALIRAHQLYGNKWAIEIAKFLPGRTDNSIKNHNWNTMCKKV                                                                                                               |
| <i>Physcomitrella patens</i> V6.1 | Pp1s120_159V6.1 | Pp3R-MYB2  | WTQQEDLALIRAHQLYGNKWAIEIAKFLPGRTDNSIKNHNWNTMCKKV                                                                                                                                                                                                                                |

Lycopodiophyta

|                                   |        |            |                                                                                                                 |
|-----------------------------------|--------|------------|-----------------------------------------------------------------------------------------------------------------|
| <i>Selaginella moellendorffii</i> | 98669  | Sm2R-MYB01 | KVGLNRGPWTPPEEDMLLTKHIEQHGEWNWRALPKAAGLLRCGKSCRLRWNYLRPNVKNRGNISEDEEDLIIMLHALLGNRSWIAAARMPPGRTDNEIKNYWNTLHLSKKL |
| <i>Selaginella moellendorffii</i> | 109587 | Sm2R-MYB02 | KVGLNRGPWTPPEEDALLIKYITAHGEGSWRTPKQAGLRCGKSCRLRWNYLRPDLKRGVFSAAEENLIIDLHATLGNRSWIAAQLPGRTDNEIKNYWNTLHLSKKL      |
| <i>Selaginella moellendorffii</i> | 437219 | Sm2R-MYB03 | KPKLRKGLWSPEEEDKLVRYITKYGHKCSIVPKHAGLQRCGKSCRLRWNYLRPDLKRGVFSAAEENLIIDLHATLGNRSWIAAQLPGRTDNEIKNFWNSCLRKKL       |
| <i>Selaginella moellendorffii</i> | 81112  | Sm2R-MYB04 | AAALKKGPWTSAEEDAILVAVYVSKHGEWNWVQKHSGLSRCGKSCRLRWANHLRPNLKKGAFTPEEERLIIELHAKLGNKWARMQAQNFQ                      |
| <i>Selaginella moellendorffii</i> | 84369  | Sm2R-MYB05 | AAALKKGPWTSAEEDSILVAVYVQKHGEWNWVQKQSGLYRCGKSCRLRWANHLRPNLKKGAFTPEEERLIIELHAKLGNKWARMATQLPGRTDNEIKNYWNTLHLSKKL   |
| <i>Selaginella moellendorffii</i> | 93784  | Sm2R-MYB06 | VKGLKKGWTPPEEDAVLVAVYVHKHGEWNWVQKNCGLSRCGKSCRLRWANHLRPNLKKGAFTPEEERTIIEELHAKLGNKWARMASQ                         |
| <i>Selaginella moellendorffii</i> | 100734 | Sm2R-MYB07 | QRNRVKGQWSLAEDKSLVVKLVKQYGTTRRWSLTFMANRSGKQCRERWVNHLPDIRKEGWTKEEEELVQAHSYFGNKSIAKMLPGRTDNSIKNHWHAAALRKKV        |
| <i>Selaginella moellendorffii</i> | 99462  | Sm2R-MYB08 | ELDRIKGPWSPEEDAAQLKLVKYGARNWSLISKIAGRSKSCRLRWNYLRPDLKRGVFSAAEENLIIDLHATLGNRSWIAAQLPGRTDNAIKNHNWNTLRRR           |
| <i>Selaginella moellendorffii</i> | 80553  | Sm2R-MYB09 | SKLCHRGHWRPAEEDKLVRIHGPQNWNLIAEKLGRSGKSCRLRWFNQDPRINRRPFTTEEEERLLAAHQLHGNKWAMIARIFPGRTDNAVKNHWHVVMARKL          |



|            |                                   |                  |             |                                                                                                                 |
|------------|-----------------------------------|------------------|-------------|-----------------------------------------------------------------------------------------------------------------|
|            | <i>Selaginella moellendorffii</i> | 77255            | Sm2R-MYB10  | SIDKVRGPWSPEEDANLQKLIQKYGARNWSLISKGVPRSGKSCRLRWCNQLSPQVEHKPFSCAEDAIIEAHAHQGNKWATIARLLPGRTDNAIKNHWNSTLRRR        |
|            | <i>Selaginella moellendorffii</i> | 140962           | Sm2R-MYB11  | IATKDRQRWQPEEDAILCAVYTYGADDWNLISERMGEPLDRDPKSCHERWKNYLKPGIKKGPLTDEEQQLVLIKQTKYGNKWKRIAEEVPRGTAKRLGKWWEVYKERLI   |
|            | <i>Selaginella moellendorffii</i> | 179572           | Sm2R-MYB12  | RIMIKGGVWKNTEDEILKAAVMKYGKNQWARISSLLVRKSAKQCKARWYEWLDPISIKKTEWTREDEKLLHLAKLMPTQWRTIPIVGRTPAQCLERYEKLLDAAC       |
|            | <i>Selaginella moellendorffii</i> | 233652           | Sm2R-MYB13  | RIMIKGGVWKNTEDEILKAAVMKYGKNQWARISSLLVRKSAKQCKARWYEWLDPISIKKTEWTREDEKLLHLAKLMPTQWRTIPIVGRTPAQCLERYEKLLDAAC       |
|            | <i>Selaginella moellendorffii</i> | 113921           | Sm2R-MYB14  | RIMIKGGVWKNTEDEILKVAAMKYAKNQWPRISSLLARKSAKQCKARWYEWLDPISIKKTEWTREDEKLLHLAKLMPTQWRTIPIVGRTPAQCLQRYEKLLDAAC       |
|            | <i>Selaginella moellendorffii</i> | 420607           | Sm2R-MYB15  | MRIMIKGWKNTEDEILKVAAMKYAKNQWPRISSLLPRKSAKQCKARWYEWLDPISIKKTEWTCEDEKLLHLAKMLTQWRTIPIVGRPPAQCLERATSRMLMIQI        |
| Gymnosperm | <i>Picea abies</i> V1.0           | MA_10048467g0010 | Pa2R-MYB001 | DGALHRGSWTPPEEDRILKTYIEANGVGRWSTLPQNAGLMRRGKSCRLRWMLHLPNPKRGHISPEDEELIIRLHNLGNRWSLIAGRVPGRTDNEVKNYWNTLSKKL      |
|            | <i>Picea abies</i> V1.0           | MA_10157944g0010 | Pa2R-MYB002 | AHTNSKGAWTKEEDKRLIAYIEAHGEGSWRSLPKAAGLLRCGKSCRLRWNYLRPDKRGNFSEEDDLIILHSLGNKWSLIAGRLPGRTDNDIKNYWNTLHKKKL         |
|            | <i>Picea abies</i> V1.0           | MA_101790g0010   | Pa2R-MYB003 | KARTNKGVTWTEEDHRLVTHIRLHGEGWRSRSLPKAAGLLRCGKSCRLRWNYLRPDLKRGSFTEEEDELIILHSLVGNKWSLIAGRLPGRTDNEIKNYWNTLHKKKL     |
|            | <i>Picea abies</i> V1.0           | MA_10190951g0010 | Pa2R-MYB004 | QPQTRKGPWTVQEDMQLIRYISLQGEGRWPYLAAGAALKRTGKSCRLRWNYLRPDLKRSKITPEEERLIILHGRWGNRWSRIAQNLPGRTDNEIKNYWRTRIKKRL      |
|            | <i>Picea abies</i> V1.0           | MA_101987g0010   | Pa2R-MYB005 | MKERQRWRSEEDSLLHAYVKRYGPREWNLVSQRMNKALDRDPKSCAERWKNYLKPGIKKGSSEDEQLRVLISLQAKYGNRWKIAAQVPGTTAKRLSKWWEVYREKQD     |
|            | <i>Picea abies</i> V1.0           | MA_10208000g0010 | Pa2R-MYB006 | GGSLKKGWPTSAAEDAILVEYVKKHGEGNWNAVQKHSGLFRCGKSCRLRWANHLRPNLKKGAFTAEIEEELIIRLHAKLGNKWARMMAAQLPGRTDNEIKNYWNTLHKKKL |
|            | <i>Picea abies</i> V1.0           | MA_10225049g0010 | Pa2R-MYB007 | HKGLKRGPWTAEDDQLIHYLQHHGLATWRTVPLAGLRCGKSCRLRWNYLRPDKRGTFSEHEDLIIRLHAILGNKWSAIASRLPGRTDNEIKNHWSNLKQKL           |
|            | <i>Picea abies</i> V1.0           | MA_10249055g0010 | Pa2R-MYB008 | DEGFNRAAWTTKEDMILRDYINIHGLEGGWRSRDKTGLNRSRGKSCRLRWNYLRPNIKRGNISTDEEELIIRLHRLGNRWSLIAGRLPGRTDNEIKNYWNTLHKKKL     |
|            | <i>Picea abies</i> V1.0           | MA_10298381g0010 | Pa2R-MYB009 | YVGLSKGPWTAEDDLRIKYEITHGEGNWRTPRKLQRCGKSCRLRWNYLRPNVKGHISPEDEEMIVRLHKLGNRWSLIAGRIPGRTDNEVKNYWNTLHKKKL           |
|            | <i>Picea abies</i> V1.0           | MA_10320g0010    | Pa2R-MYB010 | KTKTRKGPWTEEDMMLVRYISLHGEGRWFLAKAAGLKRRTGKSCRLRWNNCLRPDLKRGKITSEERLIIEHGRWGNRWSRIAQSLPGRTDNEIKNCWRTRIKKFL       |
|            | <i>Picea abies</i> V1.0           | MA_10425867g0020 | Pa2R-MYB011 | MCPRGHWRPAEDEKRELVEQYGPQNWNSIAEKLQGRSGKSCRLRWFNQLDPRINRRPFTEEEERLLAAHRLHGNKWAMIARLFPGRTDNAVKNHWHVIMARKF         |
|            | <i>Picea abies</i> V1.0           | MA_10426233g0010 | Pa2R-MYB012 | NPELVKGPWTKEEDELIVLRKYGSKKWSVISQSLPGRIGKQCRERWHNHLNPEIKKDAWSQDEEMALIRAHQIYGNKWAEIAKSLPGRTDNSIKNHWNSSIKKKL       |
|            | <i>Picea abies</i> V1.0           | MA_10429939g0010 | Pa2R-MYB013 | DEGLNRVAWTTKEDMILRDYINIHGLEGGWRSRDKTGLNRSRGKSCRLRWNYLRPNIKRGNISTDEEELIIRLHRLGNRWSLIAGRLPGRTDNEIKNYWNTLHKKKL     |
|            | <i>Picea abies</i> V1.0           | MA_10430220g0010 | Pa2R-MYB014 | KMGVKKGPWTLDEEDQILVSYINKHGHGNWRALPKQAGLLRCGKSCRLRWNYLRPDKIRGNFSPEEEDHIIKLNQLIGNRWSIASHLPGRTDNEIKNVWNTLHKKKL     |
|            | <i>Picea abies</i> V1.0           | MA_10431212g0010 | Pa2R-MYB015 | KKAVKRGFWSPEEDMKLISYIATNGHGCWSSLERAGLQRCGKSCRLRWNYLRPGIKRGNFSTEENAIISLQARLNNRWAQIAKHLPGRTDTEIKNYWHSCLKKA        |
|            | <i>Picea abies</i> V1.0           | MA_10431610g0040 | Pa2R-MYB016 | ETQTRKGPWTVVEEDMQLIKYINLHGEGRWSFVKAAGLERTGKSCRLRWNYLRPDLKRSKITHEEERLIIEHGRGNRWSRIAQSLPGRTDNDIKNYWRTCTIKKL       |
|            | <i>Picea abies</i> V1.0           | MA_10432903g0010 | Pa2R-MYB017 | VHTNNGAWTKEEDERLHIAHIEAHGEGSWRSLPKAAGLLRCGKSCRLRWNYLRPDLKRGKSIEEEDDLIILHSLGNRWSLIAGRLPGRTDNEIKNYWNTLHKKKL       |
|            | <i>Picea abies</i> V1.0           | MA_10433518g0010 | Pa2R-MYB018 | HKGQKRGWTAEEDQILHYLQRRGLSNWRALPRLAGLRCGKSCRLRWNYLRPDKIRGAFITQEDLTTRILHAFVGNKWSAIASHLPGRTDNEIKNRWNSLKKKL         |
|            | <i>Picea abies</i> V1.0           | MA_10433651g0010 | Pa2R-MYB019 | GLKLRKGAWTSEEDLLKCKIEVHGEWSWPLLPQKTGLQRSGKSCRLRWNYLRPNVKNRGNISEDEELIIRMHRLGNRWALIAGRIPGRSDNEIKNYWNTLHKKKL       |
|            | <i>Picea abies</i> V1.0           | MA_10434028g0010 | Pa2R-MYB020 | VEIMRKGWPTLEEDMRLIHYITLRGEGRWFLAKAAGLKRSGKSCRLRWNYLRPDLKRGDITPEEERLIIDLQGRWGNRWSRIAQSLPGRTDNEIKNYWRTRIKKKL      |
|            | <i>Picea abies</i> V1.0           | MA_10435380g0010 | Pa2R-MYB021 | KPKLRKGLWSPEEDDKLIKYMKNRGRGCSWSDVAMQAGLQRCGKSCRLRWNYLRPDLKRGAFSPQEEQLIHLHSLGHRWSQIAARLPGRTDNEIKNFVNSCIKKL       |
|            | <i>Picea abies</i> V1.0           | MA_10435612g0010 | Pa2R-MYB022 | KVGLKKGWPTPEEDQKLVTYIQEHGHGSRWALPQKAGLLRCGKSCRLRWNYLRPDKIRGKFSVQEEQTIQLHALLGNRWSAIATHLPKRTDNEIKNYWNTLHKKKL      |
|            | <i>Picea abies</i> V1.0           | MA_10435865g0010 | Pa2R-MYB023 | GEGIKKGLWSAEDEKLNFMVKNRPMGCSWTCVAQQIGLQRCGKSCRLRWNYLRPGLKHCASAEQESIIHLHSLVGNRWSQIAAHLPGRTDNEIKNYWNTLHKKKL       |
|            | <i>Picea abies</i> V1.0           | MA_10436747g0010 | Pa2R-MYB024 | NPNLKGLWSPEEDEKLFSLYLNNGTRSPGCSWTCVAKQAGLQRCGKSCRLRWNYLRPGLKRGAFSLEEEGLIHLQSLGNRWSQISVHLPGRTDNEIKNYWNSCVKKKL    |
|            | <i>Picea abies</i> V1.0           | MA_10859g0010    | Pa2R-MYB025 | KANVKKGPWSPEEDCKLKEYIDKHGTGGNWLALPQKVGKRCGKSCRLRWNYLRPNIKHGGFSEEDNIICSLFISIGSRWSIAAQLPGRTDNDIKNYWNTLHKKKL       |
|            | <i>Picea abies</i> V1.0           | MA_113824g0010   | Pa2R-MYB026 | EAETRKGWPTVEEDMQLIGSISLHGEGRWSFLAGAAGLKRRTGKSCRLRWNYLRPDLKRSKITREERLIIEHRRWGNMWSRIAQSLPGRTDNEIKNFWRTRMKGKL      |
|            | <i>Picea abies</i> V1.0           | MA_115846g0010   | Pa2R-MYB027 | MIKGGVWKNTEDEILKAAVMKYGKNQWARISSLLVRKSAKQCKARWYEWLDPISIKKTEWTREDEKLLHLAKLMPTQWRTIPIVGRTPSQCLERYEKLLDAAC         |
|            | <i>Picea abies</i> V1.0           | MA_116862g0010   | Pa2R-MYB028 | EESLNRGAWTGEEDRILSEYIKTHGVGGWDLPKKAGLKRSGKSCRLRWNYLRPDKIRGNISPEEELIIRLHRLGNRWSLIAGRLPGRTDNEIKNYWNTLHKKKL        |
|            | <i>Picea abies</i> V1.0           | MA_117992g0010   | Pa2R-MYB029 | ETETRKGWPTVEEDMMLSKYIRLHGEGRWFLAKAAGLKRRTGKSCRLRWNYLRPDLKRSKITLEEEELIIEHQGRWGNRWSRIAQSLPGRTDNEIKNYWRSSIKKKL     |
|            | <i>Picea abies</i> V1.0           | MA_118448g0010   | Pa2R-MYB030 | KKGLKKGWPSHEEDQILLNYIQRNGHASWRALPELAGLRCGKSCRLRWNYLRPDKIRGFSFTEQEERTIHLHAILGNRWSIASQLPGRTDNEIKNFWKTRLQKRL       |
|            | <i>Picea abies</i> V1.0           | MA_120049g0010   | Pa2R-MYB031 | EPDRIGPWSPEEDAALQHFVQKCGPRNWSLISKAIPGRSGKSCRLRWCNQLSPQVEHRPFTPEEDATHRAHAHQGNKWATIARMLSGRTDNAIKNHWNSTLRRRC       |
|            | <i>Picea abies</i> V1.0           | MA_1201g0010     | Pa2R-MYB032 | KMGVKKGWSWTSDEEDQILVSYINKHGHGNWRALPKQAGLLRCGKSCRLRWNYLRPDKIRGNFSPEEEDHIIKLNQLIGNKWSIALHLPGRTDNEIKNVWNTLHKKKL    |
|            | <i>Picea abies</i> V1.0           | MA_121533g0010   | Pa2R-MYB033 | KANVKGWWSPEEDTILKNFVEKHGTGGNIALPRKAGLKRSGKSCRLRWNYLRPDKIRGDFSEEDSIIICSLYTSIGSRWSIAAQLPGRTDNDIKNYWNTLHKKKL       |
|            | <i>Picea abies</i> V1.0           | MA_12445g0010    | Pa2R-MYB034 | KEGLNRGAWSAEEDMILWEYIRKHGDGWSKVPQKTGLKRCGKSCRLRWNYLRPDIRRGNICPDEEELICRLHRLGNRWSLIAGRLPGRGTGNEIKNYWNTLHKKKL      |
|            | <i>Picea abies</i> V1.0           | MA_124887g0010   | Pa2R-MYB035 | SGDGNGAWTKEEDARLVQHIQAHGEGCWRTLPKAAGLLRCGKSCRLRWNYLRPDLKRGYFSEDEDDLLKHLALGNKWSLIAGRLPGRTDDEIKNYWNSHLKRNM        |
|            | <i>Picea abies</i> V1.0           | MA_1261g0010     | Pa2R-MYB036 | NEGLKRGWTAEDMILLEYIRIHGDGWRKLEPKAGESQIWIYMNADVDSIDRLNLRKYFFAGLKRGSYSCRLRWNYLRPDKIRGNIPDEEELICRLHRLGNRWSVIAGL    |
|            | <i>Picea abies</i> V1.0           | MA_128244g0010   | Pa2R-MYB037 | LPGRTDNEIKNYWNTLHKKKL                                                                                           |
|            | <i>Picea abies</i> V1.0           | MA_128244g0010   | Pa2R-MYB037 | KTGLKKGWPTSEEDKILVNYIQENHGHGSRWALPKLAGLRCGKSCRLRWNYLRPDKIRGFSFTEQEERTIHLHAILGNRWSVIASQLLGRTDNEIKNFVWNTLHKKKL    |
|            | <i>Picea abies</i> V1.0           | MA_128871g0010   | Pa2R-MYB038 | KVGLKKGWPTAEEDKILINFLATHGQCCWRTVPELAGLRCGKSCRLRWNYLRPDLKRGVSESEKLIIDHSHVGNRWSKIATFLPGRTDNEIKNYWNTLHKKKL         |



|                         |                |             |                                                                                                                                |
|-------------------------|----------------|-------------|--------------------------------------------------------------------------------------------------------------------------------|
| <i>Picea abies</i> V1.0 | MA_246817g0010 | Pa2R-MYB083 | KEGLNRGTWTAQEDVILSDYIRIHGDGEWKNLPQKAGLKRKCGKSCRLRWVNYLRPXXXXXXXXXXXXXXXXXIKRGNISPDEEELIIRMHRLLGNRWSLIAGRLPGRTDNDIMHYWN IHLRKKL |
| <i>Picea abies</i> V1.0 | MA_278282g0010 | Pa2R-MYB084 | KVRLNRGAWTIKEDTILSEYIRTHGEGWNTLPQNAGLKRCGKSCRLRWLNLYLRPNIKRGKISPEDEDLIIRMHNLGNRWSLIAGRLPGRTDNEIKNYWNTLHGKKL                    |
| <i>Picea abies</i> V1.0 | MA_2797g0010   | Pa2R-MYB085 | KAHTNKGAWTKEEDEKLIAIYQAHGEGCWRSPLKAAAGLLRCGKSCRLRWNYLRPDLKRGNFSEEEDELIKHLHALLGNKWSLIAGRLPGRTDNEIKNYWNTLHKKL                    |
| <i>Picea abies</i> V1.0 | MA_30848g0010  | Pa2R-MYB086 | AGLKKKGPWYEEEDIRLLRYITHGPGRWSALAKASGLQRCGKSCRLRWVNYLRPDLKRGSIPEEESILDLHARWGNRWSLIAEKMPGRTDNEIKNYWRSHLKKKL                      |
| <i>Picea abies</i> V1.0 | MA_308669g0010 | Pa2R-MYB087 | KAHTNKGAWTPEEDARLIAHIRAHGEGCWRSPLRAAGLLRCGKSCRRIRINYPDPVGRGNFSEEEDEFIILKYSTLGNKWSLIARRLPGRTDNEIKNYWNTYIKKKL                    |
| <i>Picea abies</i> V1.0 | MA_322432g0020 | Pa2R-MYB088 | EAETRKGPWTVQEDTQLIGYIRLHGEGRWSFLAKAAGLKRTRGSCRLRWVNYLRPDLKRNKISPEEESLIMELHGRWGNRWSHARNLPGRTDNEIKNYWRTRIKGKL                    |
| <i>Picea abies</i> V1.0 | MA_323706g0010 | Pa2R-MYB089 | KEGLNRGAWTKTEDIILCEYIRIHGDGGWRTLPKKAGLKRKCGKSCRLRWLNLYLRPDIKRGGISPEEELIIRLHRLLGNRWSLIAGRLPGRTDNEIKNYWNTCLSCKL                  |
| <i>Picea abies</i> V1.0 | MA_328440g0010 | Pa2R-MYB090 | MILSDYIRIHGDGEWRNLPQKAGLRRCGKSCRLRWVNYLRPDIKGNISPEEEDLIVRLHRLLGNRWSLIAGRLPGRTDNEIKNYLNTLRKKM                                   |
| <i>Picea abies</i> V1.0 | MA_33964g0010  | Pa2R-MYB091 | KVGLKKGPWTAEDQKLISFILHNGHCWRAVPKLAGLLRCGKSCRLRWVNYLRPDLKRGLLSESEEQIILDLHSLGNGRWSKIAHGLPGRTDNEIKNYWNTLHKKL                      |
| <i>Picea abies</i> V1.0 | MA_34517g0010  | Pa2R-MYB092 | KPKLRKGLWSPEEDERLVTICMKNGLLGYSWTYVANQAGLQRCGKSCRLRWNYLRPGLKRGAFSPQEEERLIHLQSIILGNRWAQIAASLPGRTDNEIKNHWNTLKKK                   |
| <i>Picea abies</i> V1.0 | MA_357440g0010 | Pa2R-MYB093 | RRRLRKLWSPDEDNKLTNYIIRNGLMGCWNYVAKAGLQRCGKSCRLRWVNYLRPGLKRGPIRQEEERLIHLQSSLGNSRWSQIAAHLPGRTDNEIKNYWNTSICKKI                    |
| <i>Picea abies</i> V1.0 | MA_358042g0010 | Pa2R-MYB094 | HEGLKSGPWTAEDQKLIDHVQRHGLGNWRTLPKLAGLSRCGKSCRLRWVNYLRPDIKRGTFSMQEDLTVIRLHSLVGNKWSAIASHPGRTDNEIKNHWNTLKKRL                      |
| <i>Picea abies</i> V1.0 | MA_363933g0010 | Pa2R-MYB095 | YKICARGHWRIVEDAKLKDLLAQYGPQNWNLIAKKEGRSHKNHFVYSRLDPRINRKFSEEEEDRLLATHHLYGNKWAMARIFPGRTDNVVKNHWHVIMARKL                         |
| <i>Picea abies</i> V1.0 | MA_3665g0010   | Pa2R-MYB096 | KQKLRKGLWSPEEDEKLMRYVTTGHGHRWSAVPKHAGLERCGKSCRLRWVNYLRPDLKRGTFSAHEEKLITDLHAALGNRWSQIATHLPGRTDNEIKNFWNSCIKKL                    |
| <i>Picea abies</i> V1.0 | MA_37058g0010  | Pa2R-MYB097 | EEGLHRGAWTGSEDKILSEYIKTHGVGRWEDLPKAGLKRGGKSCRLRWLNLYLRPDIKGNISPEEELFRLHRLLGNRWSLIAGRLPGRTDNEIKNYWNTQLSKRV                      |
| <i>Picea abies</i> V1.0 | MA_37256g001   | Pa2R-MYB098 | KQKVKRGLWSPEEDEKLIKVYTAIGHGCWSVVPKQAGLQRCGKSCRLRWVNYLRPDLKRGFSLSQEERLIIDLHKKIGNRWAQIAKHLPGRTDNEVKNFWNSCIKKL                    |
| <i>Picea abies</i> V1.0 | MA_37851g0010  | Pa2R-MYB099 | TPKLRKGLWSPEEDEKLITYIMKKGMLGCSWTNIAKQAGLQRCGKSCRLRWVNYLRPDLKRGFSFQDEQLIRHLHLSILGNRWSQIAASLPGRTDNEIKNYWNTCIKKK                  |
| <i>Picea abies</i> V1.0 | MA_41194g0010  | Pa2R-MYB100 | SKPKLRKGLWSPGEDSKLTYEIMKNGMLSCWSYMAKQAGLQRCGKSCRLRWVNYLRPGLKRGPFHQEEERLIHLQSMILGNRWARIATQLPGRTDNEIKNYWNTSICKKI                 |
| <i>Picea abies</i> V1.0 | MA_437179g0010 | Pa2R-MYB101 | ETGLKKGWTPPEEQILLNYIRQNGPGSWRAVPKLAGLRRCGKSCRLRWVNYLRPDIKRGPFQEEERLIHLHVLGSRWSVIASQLPGRTDNEIKNFWNTLHKKRL                       |
| <i>Picea abies</i> V1.0 | MA_44263g0010  | Pa2R-MYB102 | KQKPRKCLWSPEEDHKLTYIKKHGLLSCWSYVAKQAGLQRCGKSCRLRWVNYLRPGLKRGAFSIHEERLIVHLQSIILGNRWSQIATHLPGRTDNEIKNFWNSCIKKL                   |
| <i>Picea abies</i> V1.0 | MA_446064g0010 | Pa2R-MYB103 | KEGLNRGVWTAKEDNILSEYIRIHGDGGWRNLPKAGLKRKCGKSCRLRWVNYLRPDIIRGNISPDEEELIIRMHRLLGNRWSLIAGRLRGRTDNEIKNYWNTLHKKL                    |
| <i>Picea abies</i> V1.0 | MA_45091g0010  | Pa2R-MYB104 | KEGLNRAAWTKTEDMILSQYIRVHGDGRGWTNLAKKAGLKRTRGKSCRLRWVNYLRPDIKGNISADEDELIIRLHRLLGNRWSLIAGRLPGRTDNEIKNYWNTLHKKL                   |
| <i>Picea abies</i> V1.0 | MA_460508g0010 | Pa2R-MYB105 | KMAVKKGPWNPEEDRKLMDYIQYKGFNWRALPKQAGLMRCGKSCRLRWVNYLRPDLKRGSLSPPEEQITVIRLHRLLGNRWSLIASLPGRTDNEIKNIWNSNLKRRF                    |
| <i>Picea abies</i> V1.0 | MA_46261g0010  | Pa2R-MYB106 | KPKIRKGLWSPEEDAKLISYITKNDLVDCSWNLIANQAEGCKEAYNRAMNVHTGLQRHGKSCRLRWVNYLRPGLKRGGISHQEQIILQSIILGNRWSQIAAHLPGRTDNEIKNFWNTSICKTL    |
| <i>Picea abies</i> V1.0 | MA_4704g0010   | Pa2R-MYB107 | SRLCARGHWRPAEDAKLKLVSQYGPQNWNLIAEKLEGRSGKSCRLRWVNYLRPDIIRNRPFSEEEDEKLLAAHRLYGNKWAMARLFPGRTDNAVKNHWHVIMARRY                     |
| <i>Picea abies</i> V1.0 | MA_48006g0010  | Pa2R-MYB108 | QAHTNKGAWTQEDARLIAHIRTHGEGWSSLPKAAAGLRHCRKSCRFWKNYLRPDLKRGNFSEGEDELIKHLHLLGNKWSLIAGRLPGRTDNEIKNYWNTLHKKV                       |
| <i>Picea abies</i> V1.0 | MA_51173g0010  | Pa2R-MYB109 | KANVKKGPWSPEESELKEYIAKYGTGGNIALPKQVGLKRCGKSCRLRWVNYLRPNIKHGGFSEEEEDNIICSLYLSIGSRWSIIAQLPGRTDNDIKNYWNTLHKKL                     |
| <i>Picea abies</i> V1.0 | MA_53373g0010  | Pa2R-MYB110 | KVGLHRGPWTAREDLTKYIEAHGEGQWRALPKQAGLLRCGKSCRLRWVNYLRPDIKGNITLDEEELIVRLHKLGNRWSLIAGRLPGRTDNEIKNFWNTLHKKL                        |
| <i>Picea abies</i> V1.0 | MA_53573g0010  | Pa2R-MYB111 | HEGFNRGAWTAKEDMILTEYIKTHGVGRWRSPLRKSGLKRGKSCRLRWVNYLRPDIKHGNISPEEELIIRLHRLLGNRWSLIAGRLPGRTDNEIKNYWNTLHKKV                      |
| <i>Picea abies</i> V1.0 | MA_53644g0010  | Pa2R-MYB112 | MMGVRKGPWSSEEDRKLIDYIEKHGFGNWRALPKQAGVMRCGKSCRLRWVNYLRPDIKRGSLSPDEEQITIIQLHGILGNKWSLIASLPGRTDNEIKNFWNTLHKKL                    |
| <i>Picea abies</i> V1.0 | MA_55123g0010  | Pa2R-MYB113 | KAHTNKGAWTKEEDEVLIAIYQAHGEGCWRSPLKAAAGLQRCGKSCRLRWVNYLRPDLKRGNFSEEEDELIKLSMLGNKWSLIASRLPGRTDNEIKNYWNTLHKKL                     |
| <i>Picea abies</i> V1.0 | MA_55503g0010  | Pa2R-MYB114 | GLNRGMWTRDEDLRLRNYIEANGEGWRTLPKAGLLRCGKSCRLRWVNYLRPDIKRGHILPDEEDLIVRLHRLLGNRWSLIAGRIPGRTDNEIKNYWNTLHKKL                        |
| <i>Picea abies</i> V1.0 | MA_62361g0010  | Pa2R-MYB115 | KVGLKKGPWTAEDRKLNVFITMHGHCWREVPKLAGLLRCGKSCRLRWVNYLRPDLKRGLLSESEKLIIDLHAAIGNRWSIIAQLPGRTDNEIKNYWNTLHKKL                        |
| <i>Picea abies</i> V1.0 | MA_62488g0010  | Pa2R-MYB116 | KMGIRKGPWSLEEDRKLIDYIEKHGFGNWRALPKQAGLLRCGKSCRLRWVNYLRPDLKHGSLSEEEQITIRLHGILGNRWSLIASLPGRTDNEIKNFWNTLHKKL                      |
| <i>Picea abies</i> V1.0 | MA_62687g0010  | Pa2R-MYB117 | KDGLNKGPWTQDEDLRLIQFIQAHGEGRWPAAVAKNAGLKRKCGKSCRFWVNYLRPNLKRGNISADEEDLIRLHKLGNRWSLIAGRLPGRTDNEIKNYWNTLHKKL                     |
| <i>Picea abies</i> V1.0 | MA_6285g0010   | Pa2R-MYB118 | KTGLKKGWTSPEEDKILVNYIENNGHGSWRALPKLAGLLRCGKSCRLRWVNYLRPDIKRGSFTEEERTIQLHAILGNRWSIIASQLPRRTDNEIKNFWNTLHKKL                      |
| <i>Picea abies</i> V1.0 | MA_6324g0010   | Pa2R-MYB119 | YAGLNKGPWTREEDLRLIKYIEA YEGGNWRTVPRKAGLLRCGKSCRLRWVNYLRPNVKGHISPDEEEMIIRLHNLGNRWSLIAGRIPGRTDNEIKNYWNTLHKKF                     |
| <i>Picea abies</i> V1.0 | MA_6393g0010   | Pa2R-MYB120 | KANVKKGPWSPEEESKLEKEYIDKYGTGGNIALPKQVGLKRCGKSCRLRWVNYLRPNIKHGGFSEEEEDNIICSLYLSIGSRWSIIAQLPGRTDNDIKNYWNTLHKKL                   |
| <i>Picea abies</i> V1.0 | MA_64405g0010  | Pa2R-MYB121 | KEGLNRGAWTKEDMILSEYVRIHGDGRWRNLPQKAGLMRCGKSCRLRWVNYLRPDIKGNISPDEEELIIRLHRLLGNRWSLIAGRLPGRTDNEIKNYWNTLHKKR                      |
| <i>Picea abies</i> V1.0 | MA_66255g0010  | Pa2R-MYB122 | NIGLKKGPWTPPEEQKLIDYIQRHGHGSWRALPKRAGLLRCGKSCRLRWVNYLRPDIKRGQFSFEEEQITIELHVLGNKWSLIAGHPGRTDNEIKNYWNTLHKKL                      |
| <i>Picea abies</i> V1.0 | MA_66845g0010  | Pa2R-MYB123 | KPMSNKGWSPEEDNLTNYIMKNGLLGGWVYVKKAGLQRCGKSCRLRWVNYLRPGLKRGAFSYQEEQIILHLSIFGNRWSLIATQLPGRTDNELKNYWNSGLKKL                       |
| <i>Picea abies</i> V1.0 | MA_67705g0010  | Pa2R-MYB124 | KDNVKGWPWSPEEESKLEKEYIEKYGTGANWISLPQKVGRLRCGKSCRLRWVNYLRPNLKHGGFSEEEEDNIICSLYLSIGSRWSMIAARLPGRTDNDIKNHWNTLHKKL                 |
| <i>Picea abies</i> V1.0 | MA_692795g0010 | Pa2R-MYB125 | KTGLKKGWTPKEDKILADYIEKNGDGSWRGLPKLAGLLRCGKSCRLRWVNYLRPDIKRGKSFTEEETLISLHAIVGNRWSAIASQIPGRTDNGIKNFWNTLHKKL                      |
| <i>Picea abies</i> V1.0 | MA_69407g0010  | Pa2R-MYB126 | KQGLNRGAWTEKEDMILSEYIRIHGDGKWRYLPEKAGLKRKCGKSCRLRWVNYLRPDIKGNISPDEEELIIRLHRLLGNRWSLIAGRLPGRTDSEIKNYWNTLHKKL                    |

|            |                                  |                                              |             |                                                                                                                                              |
|------------|----------------------------------|----------------------------------------------|-------------|----------------------------------------------------------------------------------------------------------------------------------------------|
|            | <i>Picea abies</i> V1.0          | MA_7055g0010                                 | Pa2R-MYB127 | NAGLNRPWTLLEEDRLTNYIEAHGEGGWTLNPKKAGLLRCGKSCRLRWVWNYLRPDVVKRGHILLDEEDLILRLHRLLGNRWSLIAGRMPGRTDNEIKNYWNTLSKKL                                 |
|            | <i>Picea abies</i> V1.0          | MA_7115g0010                                 | Pa2R-MYB128 | KEGLNRGAWSRKEDMILSEYIRIHGDGGWTLNPKKAGLLRCGKSCRLRWVWNYLRPDVVKRGHILLDEEDLILRLHRLLGNRWSLIAGRMPGRTDNEIKNYWNTLSKKL                                |
|            | <i>Picea abies</i> V1.0          | MA_73502g0010                                | Pa2R-MYB129 | EDETRKGPWTVEEDMQLTEYIRLHGEGRWSFVAKGAGLKRTRGRSCLRWVWNSLRPGLKRSKITPEEERLIELHLDWRWGNRWSHIARSLPGRTDNETKNYWRTRIKGKL                               |
|            | <i>Picea abies</i> V1.0          | MA_80033g0010                                | Pa2R-MYB130 | KSNVKKGPWSREEDSKLKEYMDKCGAGGNWALPQKVGKRCGKSCRLRWVWNSLRPGLKRSKITPEEERLIELHLDWRWGNRWSHIARSLPGRTDNETKNYWRTRIKGKL                                |
|            | <i>Picea abies</i> V1.0          | MA_8069842g0010                              | Pa2R-MYB131 | KPKLRKGLWSPEEDEKLIAIYANNMGVGCWSGYVAKQAGLQRCGKSCRLRWVWNSLRPGLKRSKITPEEERLIELHLDWRWGNRWSHIARSLPGRTDNETKNYWRTRIKGKL                             |
|            | <i>Picea abies</i> V1.0          | MA_8147g0020                                 | Pa2R-MYB132 | KEGLNRGAWTKKEDMILSEYIRIHGDGGWRNPKKAGLKRRCGKSCRLRWVWNSLRPGLKRSKITPEEERLIELHLDWRWGNRWSHIARSLPGRTDNETKNYWRTRIKGKL                               |
|            | <i>Picea abies</i> V1.0          | MA_81763g0010                                | Pa2R-MYB133 | NGDRNKGAWTKEEDRLIYIQVHGEGCWRSLPKAAGLLRCGKSCRLRWVWNSLRPGLKRSKITPEEERLIELHLDWRWGNRWSHIARSLPGRTDNETKNYWRTRIKGKL                                 |
|            | <i>Picea abies</i> V1.0          | MA_8206949g0010                              | Pa2R-MYB134 | KMGVKKGPWSPEEDRKLIDYVQKHGFGNWRAPRQAGLLRCGKSCRLRWVWNSLRPDLKRSKITPEEERLIELHLDWRWGNRWSHIARSLPGRTDNETKNYWRTRIKGKL                                |
|            | <i>Picea abies</i> V1.0          | MA_82197g0010                                | Pa2R-MYB135 | KVGKVKGPWTPEEDIALVSYIQEHGPGNWRLLPARTGLLRCSKSCRLRWVWNSLRPGLKRSKITPEEERLIELHLDWRWGNRWSHIARSLPGRTDNETKNYWRTRIKGKL                               |
|            | <i>Picea abies</i> V1.0          | MA_8356281g0010                              | Pa2R-MYB136 | KVGLHRGPWTAREDLTKYIEAHGEGQWRALPKQAGLLRCGKSCRLRWVWNSLRPDLKRSKITPEEERLIELHLDWRWGNRWSHIARSLPGRTDNETKNYWRTRIKGKL                                 |
|            | <i>Picea abies</i> V1.0          | MA_83918g0010                                | Pa2R-MYB137 | KTGLKKGWPTCEEDQILVNYIQKNGHGSWRALPKLAGLRRCGKSCRLRWVWNSLRPDLKRSKITPEEERLIELHLDWRWGNRWSHIARSLPGRTDNETKNYWRTRIKGKL                               |
|            | <i>Picea abies</i> V1.0          | MA_85363g0010                                | Pa2R-MYB138 | KAEIKKVLWSPEEDEKLFNYIMKNGLLGSWTWYVAKKAGLRRSGKSCRLRWVWNSLRPGLKRSKITPEEERLIELHLDWRWGNRWSHIARSLPGRTDNETKNYWRTRIKGKL                             |
|            | <i>Picea abies</i> V1.0          | MA_8626g0010                                 | Pa2R-MYB139 | KEELSRGAWTAMEDVILSRYIRIHGDGGWRNPKKAGLKRRCGKSCRLRWVWNSLRPDLKRSKITPEEERLIELHLDWRWGNRWSHIARSLPGRTDNETKNYWRTRIKGKL                               |
|            | <i>Picea abies</i> V1.0          | MA_87695g0010                                | Pa2R-MYB140 | QAETRKGPWTVEEDVQLKGYIHLHGEGRWSFLAKAAGLKRTRGRSCLRWVWNSLRPDLKRSKITPEEERLIELHLDWRWGNRWSHIARSLPGRTDNETKNYWRTRIKGKL                               |
|            | <i>Picea abies</i> V1.0          | MA_8846750g0010                              | Pa2R-MYB141 | SAHTNKGAWTREDQRLIAYIQTHEEGRWRSPLKAAAGFFPALSSMKLLVACHLIKSLYITSLHSSAGLLRCGKSCRLRWVWNSLRPDLKRSKITPEEERLIELHLDWRWGNRWSHIARSLPGRTDNETKNYWRTRIKGKL |
|            | <i>Picea abies</i> V1.0          | MA_89683g0010                                | Pa2R-MYB142 | VAERIKGPWSPEEDATLHRLVEKYGPRNWSQISRGIPGRSGKSCRLRWVWNSLRPDLKRSKITPEEERLIELHLDWRWGNRWSHIARSLPGRTDNETKNYWRTRIKGKL                                |
|            | <i>Picea abies</i> V1.0          | MA_93111g0010                                | Pa2R-MYB143 | DTRTRKGPWTIQEDMELTRYISLHGDGHWNFLAKAAGLKRTRGKSCRLRWVWNSLRPDLKRSKITPEEERLIELHLDWRWGNRWSHIARSLPGRTDNETKNYWRTRIKGKL                              |
|            | <i>Picea abies</i> V1.0          | MA_93127g0010                                | Pa2R-MYB144 | KVGLNRGRWTAEEDEILTKYIQTHGEGSWRSLPQAGLLRCGKSCRLRWVWNSLRPDLKRSKITPEEERLIELHLDWRWGNRWSHIARSLPGRTDNETKNYWRTRIKGKL                                |
|            | <i>Picea abies</i> V1.0          | MA_93317g0010                                | Pa2R-MYB145 | MARTPLGLNKGSWTRDEDLRLNYIEAHGEGEWRTLPEKAGLLRGGKSCRLRWVWNSLRPDLKRSKITPEEERLIELHLDWRWGNRWSHIARSLPGRTDNETKNYWRTRIKGKL                            |
|            | <i>Picea abies</i> V1.0          | MA_9343698g0010                              | Pa2R-MYB146 | KPKLRKGFWSPEEDSKLSEYILKNGLMGCWSYVAKQAEKRCGKSCRLRWVWNSLRPGLKRSKITPEEERLIELHLDWRWGNRWSHIARSLPGRTDNETKNYWRTRIKGKL                               |
|            | <i>Picea abies</i> V1.0          | MA_936250g0010                               | Pa2R-MYB147 | HEGLKSGPWTPEEDQKLIDHVQRHGLGNWRSPLKAGLRCGKSCRLRWVWNSLRPDLKRSKITPEEERLIELHLDWRWGNRWSHIARSLPGRTDNETKNYWRTRIKGKL                                 |
|            | <i>Picea abies</i> V1.0          | MA_9374017g0010                              | Pa2R-MYB148 | EMGLKKGWPTPEEDQILSYINKHGHGNWRALPKQAGLMRCGKSCRLRWVWNSLRPDLKRSKITPEEERLIELHLDWRWGNRWSHIARSLPGRTDNETKNYWRTRIKGKL                                |
|            | <i>Picea abies</i> V1.0          | MA_9381481g0010                              | Pa2R-MYB149 | GEETRKGPWTVEDDMQLMEYIRLHGQGCWSFVAKGAGLKRTRGRSCLRWVWNSLRPGLKRSKITPEEERLIELHLDWRWGNRWSHIARSLPGRTDNETKNYWRTRIKGKL                               |
|            | <i>Picea abies</i> V1.0          | MA_94467g0010                                | Pa2R-MYB150 | QVGLHRGPWTAKEENLTRWIEWHGEGDWRNLPKAGLLRCGKSCRLRWVWNSLRPDLKRSKITPEEERLIELHLDWRWGNRWSHIARSLPGRTDNETKNYWRTRIKGKL                                 |
|            | <i>Picea abies</i> V1.0          | MA_9483804g0010                              | Pa2R-MYB151 | KVGLKKGWPTPEEDQKLVAIYIQEHGHGSWRALPKQAGLLRCGKSCRLRWVWNSLRPDLKRSKITPEEERLIELHLDWRWGNRWSHIARSLPGRTDNETKNYWRTRIKGKL                              |
|            | <i>Picea abies</i> V1.0          | MA_95226g0010                                | Pa2R-MYB152 | KTGIRKGPWTPEEDKILVSYIQKKGHGSWRALPKLAGLRCGKSCRLRWVWNSLRPDLKRSKITPEEERLIELHLDWRWGNRWSHIARSLPGRTDNETKNYWRTRIKGKL                                |
|            | <i>Picea abies</i> V1.0          | MA_95339g0010                                | Pa2R-MYB153 | ETQTRKGPWTVEEDMELIKYISVHGEGRWSFLARAAGLKRTRGKSCRLRWVWNSLRPDLKRSKITPEEERLIELHLDWRWGNRWSHIARSLPGRTDNETKNYWRTRIKGKL                              |
|            | <i>Picea abies</i> V1.0          | MA_96853g0010                                | Pa2R-MYB154 | TLKKGWPTSAEDAILVEYVKKHGEENWNAVQKHSGLSRCGKSCRLRWVWNSLRPDLKRSKITPEEERLIELHLDWRWGNRWSHIARSLPGRTDNETKNYWRTRIKGKL                                 |
|            | <i>Picea abies</i> V1.0          | MA_9818613g0010                              | Pa2R-MYB155 | VDGLNRGAWTANEDKILSEYIKTHGVGRWGDLPKAGLLRRCGKSCRLRWVWNSLRPDLKRSKITPEEERLIELHLDWRWGNRWSHIARSLPGRTDNETKNYWRTRIKGKL                               |
|            | <i>Picea abies</i> V1.0          | MA_98249g0010                                | Pa2R-MYB156 | KPKIRKRFWAPEEDEKLFNYMMKSRLIRCSWSYVAKQVGIHRCGKSCRLRWVWNSLRPGLKRSKITPEEERLIELHLDWRWGNRWSHIARSLPGRTDNETKNYWRTRIKGKL                             |
|            | <i>Picea abies</i> V1.0          | MA_9831998g0010                              | Pa2R-MYB157 | QPQTRKGPWTVQEDMQLIRYISLHGEGRWPYLAKAAGLKRTRGKSCRLRWVWNSLRPDLKRSKITPEEERLIELHLDWRWGNRWSHIARSLPGRTDNETKNYWRTRIKGKL                              |
|            | <i>Picea abies</i> V1.0          | MA_98376g0010                                | Pa2R-MYB158 | YAGLNKGPWTPEEDRLIKYIEAHGQGNWRTLPNKAGLQRCGKSCRLRWVWNSLRPGLKRSKITPEEERLIELHLDWRWGNRWSHIARSLPGRTDNETKNYWRTRIKGKL                                |
|            | <i>Picea abies</i> V1.0          | MA_99955g0010                                | Pa2R-MYB159 | KDGLNKGPWTQDEDFRLTQFIQAHGEGRWSALAKNAGLKRRCGKSCRLRWVWNSLRPDLKRSKITPEEERLIELHLDWRWGNRWSHIARSLPGRTDNETKNYWRTRIKGKL                              |
|            | <i>Picea abies</i> V1.0          | MA_9783816g0010                              | Pa2R-MYB160 | RGQRIKGPWSPEEDASLQKLVEKLGPRNWSLISKIPGRSGKSCRLRWVWNSLRPGLKRSKITPEEERLIELHLDWRWGNRWSHIARSLPGRTDNETKNYWRTRIKGKL                                 |
| Angiosperm | <i>Amborella trichopoda</i> v1.0 | evm_27.model.AmTr_v1.0_scaffol<br>d00001.525 | Atr2R-MYB01 | KTLLIKGQWSSEEDKMLVRLVDEFGEKKWSQIACRLVGRVKGQCRERWHNHLRPDIKKDAWSEEEERTLVEAHADVGNRWAIEAKCLPGRTDNETKNYWRTRIKGKL                                  |
|            | <i>Amborella trichopoda</i> v1.0 | evm_27.model.AmTr_v1.0_scaffol<br>d00001.72  | Atr2R-MYB02 | QQKVKRGLWSPEEDEKLVRYITSNYGYCWSEVPEKAGLQRCGKSCRLRWVWNSLRPDLKRSKITPEEERLIELHLDWRWGNRWSHIARSLPGRTDNETKNYWRTRIKGKL                               |
|            | <i>Amborella trichopoda</i> v1.0 | evm_27.model.AmTr_v1.0_scaffol<br>d00003.210 | Atr2R-MYB03 | DSELRRGPWTVEEDMILVNYIANHGEGRWNSLARCAGLKRTRGKSCRLRWVWNSLRPDLKRSKITPEEERLIELHLDWRWGNRWSHIARSLPGRTDNETKNYWRTRIKGKL                              |
|            | <i>Amborella trichopoda</i> v1.0 | evm_27.model.AmTr_v1.0_scaffol<br>d00003.458 | Atr2R-MYB04 | KNGLKKGWPTPEEDQKLIDYIKKHGHGSWRALPKSAGLRCGKSCRLRWVWNSLRPDLKRSKITPEEERLIELHLDWRWGNRWSHIARSLPGRTDNETKNYWRTRIKGKL                                |
|            | <i>Amborella trichopoda</i> v1.0 | evm_27.model.AmTr_v1.0_scaffol<br>d00005.249 | Atr2R-MYB05 | KQDTNKGAWTKQEDEKLIAIYIRKHGEGCWRSLPEAAGLLRCGKSCRLRWVWNSLRPDLKRSKITPEEERLIELHLDWRWGNRWSHIARSLPGRTDNETKNYWRTRIKGKL                              |
|            | <i>Amborella trichopoda</i> v1.0 | evm_27.model.AmTr_v1.0_scaffol<br>d00006.100 | Atr2R-MYB06 | MDRIKGPWSPEEDEQLRKLQKHGPRNWSLISKSIPGRSGKSCRLRWVWNSLRPGLKRSKITPEEERLIELHLDWRWGNRWSHIARSLPGRTDNETKNYWRTRIKGKL                                  |
|            | <i>Amborella trichopoda</i> v1.0 | evm_27.model.AmTr_v1.0_scaffol<br>d00006.298 | Atr2R-MYB07 | KSGTKKGPWTPEEDQKLVEYIRLLRCGKSCRLRWVWNSLRPDLKRSKITPEEERLIELHLDWRWGNRWSHIARSLPGRTDNETKNYWRTRIKGKL                                              |
|            | <i>Amborella trichopoda</i> v1.0 | evm_27.model.AmTr_v1.0_scaffol<br>d00007.133 | Atr2R-MYB08 | TMTRVKGSWSPEEDATLSRLVAHHGARNWSAISAGIPGRSGKSCRLRWVWNSLRPGLKRSKITPEEERLIELHLDWRWGNRWSHIARSLPGRTDNETKNYWRTRIKGKL                                |
|            | <i>Amborella trichopoda</i> v1.0 | evm_27.model.AmTr_v1.0_scaffol<br>d00010.370 | Atr2R-MYB09 | QRDRHIVTWPQEDDLREQIRINGTESWTAIASKFKDKTSRQRRRWYTYLNSDFKKGWSAEEDKLLCEAQKIFGNRWTEIAKVVSGRTDNAVKNRFTLCKKKA                                       |

|                                  |                                              |             |                                                                                                                 |
|----------------------------------|----------------------------------------------|-------------|-----------------------------------------------------------------------------------------------------------------|
| <i>Amborella trichopoda</i> v1.0 | evm_27.model.AmTr_v1.0_scaffol<br>d00010.457 | Atr2R-MYB10 | KIGVKKGPWTPPEEDIILVSYIQEHGPGNWRVPTNTGLLRCSKSCRLRWYNLPGIKRGNFTEHEEKIIIHLQALLGNRWAAIASYLPQRTDNDIKNYWNTHLKKKL      |
| <i>Amborella trichopoda</i> v1.0 | evm_27.model.AmTr_v1.0_scaffol<br>d00010.503 | Atr2R-MYB11 | SKLCARGHWRPAEDAKLKELVALYGPQNWNLIAEKLEGRSGKSCRLRWFNQLDPRINRRAFSEEEERLMAAHLRYGNKWAMIARLFPGRTDNAVKNHWHVIMARKY      |
| <i>Amborella trichopoda</i> v1.0 | evm_27.model.AmTr_v1.0_scaffol<br>d00010.533 | Atr2R-MYB12 | KVGLKKGPWTPPEEDQKLLAYIEEHGHSWRALPVKAGLLRCGKSCRLRWYNLRPDIKRGKFSLQEEQTIIQLHALLGNRWSAIATHLPRRTDNEIKNYWNTHLKKKL     |
| <i>Amborella trichopoda</i> v1.0 | evm_27.model.AmTr_v1.0_scaffol<br>d00019.457 | Atr2R-MYB13 | NPDLVKGQWSKEGDDMIIEVLQHGAKNWSTIAQALLGWNGKQCRERWHNHLNPAIHKEAWTPHEELALIRAHQHGKWKVLAFLPGRTNNAIKNNWNSLKKKL          |
| <i>Amborella trichopoda</i> v1.0 | evm_27.model.AmTr_v1.0_scaffol<br>d00022.393 | Atr2R-MYB14 | NKRLRKGLWSPEEDEKLMRYMMGNGQGCWSDVARNAGLQRCGKSCRLRWYNLRLPDLKRGAFSPQEEELIVHLHSILGNRWSQIARMLPGRTDNEIKNFWNSTIKKRL    |
| <i>Amborella trichopoda</i> v1.0 | evm_27.model.AmTr_v1.0_scaffol<br>d00024.221 | Atr2R-MYB15 | KEGLNRGAWTTQEDKILTDYINTHGEGKWRTLPKKAGLKRCGKSCRLRWYNLRLPDIKRGNISDEEEDLIRLHKLGNRWSLIAGRLPGRTDNEIKNYWNTNLGKKV      |
| <i>Amborella trichopoda</i> v1.0 | evm_27.model.AmTr_v1.0_scaffol<br>d00024.222 | Atr2R-MYB16 | KEGLNKGAWTAQEDKILTDYIKTHGEGKWRTLSQSTGLKRCGKSCRLRWYNLRLPDIKRGNFSDQEEELIIRLHKLGNRWSLIAGRLPGRTDNEIKNYWNTYLKVKF     |
| <i>Amborella trichopoda</i> v1.0 | evm_27.model.AmTr_v1.0_scaffol<br>d00024.223 | Atr2R-MYB17 | EEGLTKGAWTAQEDTILTRYINTHGEGKWALPKRSGLKRCGKSCRLRWYNLRLPNIKRGNISCEEEDLIRLHNLGNRWSLIAGRLPGRTDNEIKNYWNTNLGKKH       |
| <i>Amborella trichopoda</i> v1.0 | evm_27.model.AmTr_v1.0_scaffol<br>d00024.225 | Atr2R-MYB18 | AKNVNKGAWTAEDQILSQCIKTHGAKKQSPAKAGLKRCGKSCRLRWYNLRLPDIKRGNISCEEEDLIRLHKLGNRWSLIAGRLPGRTDNEIKNYWNTYLSKKL         |
| <i>Amborella trichopoda</i> v1.0 | evm_27.model.AmTr_v1.0_scaffol<br>d00024.329 | Atr2R-MYB19 | AKRSGKRLWSHEEDLRLIRHIEAYGKGSWTTLPOKAGLNRNSKSCRLRWYNLRLPDIKHGNFSPEEDDLIRLHRLVENRWSLIAGRVGRTDSQIKNFWNTRYRGKK      |
| <i>Amborella trichopoda</i> v1.0 | evm_27.model.AmTr_v1.0_scaffol<br>d00024.337 | Atr2R-MYB20 | KLGLNKGWPTEEDFLLINYINAHGEGGWTLNPKAGLLRCGKSCRLRWYNLRLPDVYKRGYILPEEEDLIRLHRLGNRWSLIAGRIPGRTDNEIKNYWNTLHLSKLL      |
| <i>Amborella trichopoda</i> v1.0 | evm_27.model.AmTr_v1.0_scaffol<br>d00024.83  | Atr2R-MYB21 | MCTRGHWRPSEDDKELVDKYGPHNWNIAIEKLQGRSGKSCRLRWFNQLDPRINRSPFTEEEERLLASHRLHGNRWAIARLFPGRTDNAVKNHWHVIMARKC           |
| <i>Amborella trichopoda</i> v1.0 | evm_27.model.AmTr_v1.0_scaffol<br>d00029.245 | Atr2R-MYB22 | SDERIKGPWSPEEDA VLSRLVSKFGARNWSLIARGIPGRSGKSCRLRWCNQLDPCVKRKPFTTEEDRTIVA AHAIHGKWA AIARLLQGRTDNAIKNHWNSTLRRKC   |
| <i>Amborella trichopoda</i> v1.0 | evm_27.model.AmTr_v1.0_scaffol<br>d00030.93  | Atr2R-MYB23 | VGLLRGPWIAREDTLLKRYIETHGEGRWRSPLPKAGLLRCGKSCRLRWYNLRLPNIKRGNIKQDEEELIVRLHALLGNRWSLIAGRLPGRTDNEIKNYWNTLHLSKLL    |
| <i>Amborella trichopoda</i> v1.0 | evm_27.model.AmTr_v1.0_scaffol<br>d00032.229 | Atr2R-MYB24 | KSSVRKGPWTPPEEDAKILAYISGHGTGNWTA VPKKAGLKRCGKSCRLRWYNLRLPDLKHDRFTPQEEEDLIVSLHAAIGSRWSLIAAHLPGRTDNDIKNYWNTKLRKKL |
| <i>Amborella trichopoda</i> v1.0 | evm_27.model.AmTr_v1.0_scaffol<br>d00032.36  | Atr2R-MYB25 | KVGLNKGAWTPSEDMKLVSYIKNHGHNWRALPKQAGLLRCGKSCRLRWYNLRLPDIKRGNFSEEEETIHLHSLGNRWSLIASRLPGRTDNEIKNVWNTHLKKKL        |
| <i>Amborella trichopoda</i> v1.0 | evm_27.model.AmTr_v1.0_scaffol<br>d00036.42  | Atr2R-MYB26 | KPKYKGLWSPDEQRLRDYVLRFGHGCWSSVPIRAGLQRNGKSCRLRWYNLRLPGLKRGLFTPEHETILRLHATLGNKWSQIATHLPGRTDNEIKNYWNTYLKKKV       |
| <i>Amborella trichopoda</i> v1.0 | evm_27.model.AmTr_v1.0_scaffol<br>d00037.85  | Atr2R-MYB27 | AASLKKGPWTS AEDAILVEYVKKHGEGNWA VQKNSGLSRCGKSCRLRWANHLRPNLKKGSFSPEERLILHLHAKLGNKWARMAAQLPGRTDNEIKNYWNTRIKRRQ    |
| <i>Amborella trichopoda</i> v1.0 | evm_27.model.AmTr_v1.0_scaffol<br>d00038.125 | Atr2R-MYB28 | DNGLKKGWPTEEDQKLVNYIKQGHGHSWRALPKHAGLNRGKSCRLRWYNLRLPDIKRGKFSSEEEQTILHLHSILGNKWSAIATHLPGRTDNEIKNFWNTHLKKKL      |
| <i>Amborella trichopoda</i> v1.0 | evm_27.model.AmTr_v1.0_scaffol<br>d00038.91  | Atr2R-MYB29 | GGVLKKGWPWSAEDA VLIIEYVKKHGEGNWA VQKHSGLSRCGKSCRLRWANHLRPNLKKGAFTADEERLIELHAKIGNKWARMASQLPGRTDNEIKNYWNTRIKRRQ   |
| <i>Amborella trichopoda</i> v1.0 | evm_27.model.AmTr_v1.0_scaffol<br>d00039.132 | Atr2R-MYB30 | DEVNRRGPWTAEDKLLIQYVRMHGEGRWNSAAESVGLKRSKSCRLRWYNLRLPDLKKGHITPEEERLIVELHARWGNRWSLIARSLPGRTDNEIKNYWRTHFKKKE      |
| <i>Amborella trichopoda</i> v1.0 | evm_27.model.AmTr_v1.0_scaffol<br>d00044.207 | Atr2R-MYB31 | KANVKKGPWSPEEDAKLKAFIEQHGTGGNWIALPQKIGLKRCGKSCRLRWYNLRLPNIKHGGFSEEEEDIICSLYISIGSRWSIAAQLPGRTDNDIKNYWNTLHLSKLL   |
| <i>Amborella trichopoda</i> v1.0 | evm_27.model.AmTr_v1.0_scaffol<br>d00044.255 | Atr2R-MYB32 | MKERQRWQPEEDALLRAYVQYGPKEWNLVSQRMGRPLHRDAKSLERWKNYLKPGIKKGLSQQEALVVALQAKYGNKWKKIAAEVPGRTAKRLGKWWVEVFEKQA        |
| <i>Amborella trichopoda</i> v1.0 | evm_27.model.AmTr_v1.0_scaffol<br>d00045.155 | Atr2R-MYB33 | KQKLKGLWSPEEDEKLLRHITKYGHGCWSSVPKQAGLQRCGKSCRLRWYNLRLPDLKRGTFSQEENMIIEHLAVLGNRWSQIAAQLPGRTDNEIKNLWNSCIKKL       |
| <i>Amborella trichopoda</i> v1.0 | evm_27.model.AmTr_v1.0_scaffol<br>d00049.47  | Atr2R-MYB34 | VGLKRGPWNAEEDKLMNFILNNGQNCWRLVPLKAGLLRCGKSCRLRWYNLRLPDLKRGALSEFEENKIELHSLGNRWSRIASQLPGRTDNEIKNHWNTRIKKKL        |
| <i>Amborella trichopoda</i> v1.0 | evm_27.model.AmTr_v1.0_scaffol<br>d00055.19  | Atr2R-MYB35 | KAHTNKGAWTKEEDERLISHIRAHGEGCWRSPLKAAAGLLRCGKSCRLRWYNLRLPDLKRGNFTEEEDLIIKLSLGNKWSLIAGRLPGRTDNEIKNYWNTHIRRKL      |
| <i>Amborella trichopoda</i> v1.0 | evm_27.model.AmTr_v1.0_scaffol<br>d00056.195 | Atr2R-MYB36 | KANVKRGPWSPEEDNALRNYVQR YGTGGNWIALPQKAGLKRCGKSCRLRWYNLRLPDIKHGFGTEEEDNIIISLYKTIGSRWSVIASQLPGRTDNDVKNYWNTLHLSKLL |
| <i>Amborella trichopoda</i> v1.0 | evm_27.model.AmTr_v1.0_scaffol<br>d00067.33  | Atr2R-MYB37 | RIMIKGGVWKNTEDEILKAAVMKYGKNQWARISSLLVRKSAKQCKARWYEWLDPISIKTEWTRREEDEKLLHLAKLMPTQWRTIPIVGRTPSQCLERYEKLLDAAC      |
| <i>Amborella trichopoda</i> v1.0 | evm_27.model.AmTr_v1.0_scaffol<br>d00068.46  | Atr2R-MYB38 | KVGMKRGWSPPEEDEVLYAYIAREGEGRWRTLPKRAKAGLLRCGKSCRLRWYNLRLPDIKRGHIAPEEEDLIRLHRLGNRWSLIAGRIPGRTDNEIKNFWNTLHLSKLL   |
| <i>Amborella trichopoda</i> v1.0 | evm_27.model.AmTr_v1.0_scaffol<br>d00068.48  | Atr2R-MYB39 | KVGMKRGWTPPEEDEVLYAYIAREGEGRWRTLPKRAKAGLLRCGKSCRLRWYNLRLPDIKRGHIAPEEEDLIRLHRLGNRWSLIAGRIPGRTDNEIKNFWNTLHLSKLL   |
| <i>Amborella trichopoda</i> v1.0 | evm_27.model.AmTr_v1.0_scaffol<br>d00068.49  | Atr2R-MYB40 | KVGMKRGWTPPEEDEVLYAYIAREGEGRWRTLPKRAKAGLLRCGKSCRLRWYNLRLPDIKRGHIAPEEEDLIRLHRLGNRWSLIAGRIPGRTDNEIKNFWNTLHLSKLL   |
| <i>Amborella trichopoda</i> v1.0 | evm_27.model.AmTr_v1.0_scaffol<br>d00068.74  | Atr2R-MYB41 | KVGLKLGWPTEEDEVLAAYIGSEGEGRWRTLPKHAGLLRCGKSCRLRWYNLRLPDIKRGHIAPEEEDLIRLHRLGNRWSLIAGRIPGRTDNEIKNYWNTLHLSKLL      |
| <i>Amborella trichopoda</i> v1.0 | evm_27.model.AmTr_v1.0_scaffol<br>d00076.56  | Atr2R-MYB42 | KANVKKGPWSPDEDLKKEYIEKNGTGGNWISLPQKAGLKRCGKSCRLRWYNLRLPNIKHGEFSDEEDRIICNLFASIGSRWSVIAAQLPGRTDNDIKNYWNTLHLSKLL   |
| <i>Amborella trichopoda</i> v1.0 | evm_27.model.AmTr_v1.0_scaffol<br>d00079.58  | Atr2R-MYB43 | GGDLRRGPWTL EEDTLLIHYIACHGEGRWNMLAKYSGLKRTGKSCRLRWYNLRLPDIKRGNTPEEQLLILELHSGWGNRWSRIAQHLPGRTDNEIKNYWRTRVQRQA    |
| <i>Amborella trichopoda</i> v1.0 | evm_27.model.AmTr_v1.0_scaffol<br>d00083.33  | Atr2R-MYB44 | KQKLKGLWSPQDEKLMKHITQFIGCWSSVPKQAGLQRCGKSCRLRWYNLRLPDLKRGFSHQEENIISLHVLGNRWSQIAAQLPGRTDNEIKNLWNSCLKKKL          |
| <i>Amborella trichopoda</i> v1.0 | evm_27.model.AmTr_v1.0_scaffol<br>d00091.4   | Atr2R-MYB45 | VGLKKGWPWTADEDKLINFILTNGQCCWRA VPKLAGLLRCGKSCRLRWYNLRLPDLKRGLLSESEEQMVIDIHYLGNRWSKIAAHLPGRTDNEIKNYWNTLHLSKLL    |
| <i>Amborella trichopoda</i> v1.0 | evm_27.model.AmTr_v1.0_scaffol<br>d00096.31  | Atr2R-MYB46 | RPNLVKGQWTL EEDRLLIHLVDQYGVKWSQIAKMFGRVKGQCRERWHNHLRPNIKKDTWTEEEELVQAHLIENKWA EIARRLPGRTEAIKNHWNATKRRQL         |
| <i>Amborella trichopoda</i> v1.0 | evm_27.model.AmTr_v1.0_scaffol<br>d00105.9   | Atr2R-MYB47 | MLFGPRSWKKIAGFVPGRTQVQCRERWLNLSLDPKLEEWTDGEDSKLKA AIAEHGYCWSKIASHVHPRTDSQCRRRWVLFPEEV                           |
| <i>Amborella trichopoda</i> v1.0 | evm_27.model.AmTr_v1.0_scaffol<br>d00111.43  | Atr2R-MYB48 | MIDAGAMRKGPMPEEDELLEYVRHHGPRDWSAIRSKGLLPRTGKSCRLRWVNLKLPDLKTGCKFSPEEERIVIELQAKFGNKWARIATYLPGRTDNDVKNFWSTRQKRLA  |

|          |                                  |                                              |             |                                                                                                                                                                                                                               |
|----------|----------------------------------|----------------------------------------------|-------------|-------------------------------------------------------------------------------------------------------------------------------------------------------------------------------------------------------------------------------|
|          | <i>Amborella trichopoda v1.0</i> | evm_27.model.AmTr_v1.0_scaffol<br>d00119.82  | Atr2R-MYB49 | SKLCARGHWRPAEDAKLKLVELVAQFGPQNVNVAIERLEGRSGKSCRLRWFNQLDPRINRRASFSEEEERLLAAHRLYGKWKWAMIARLFPGRTDNAVKNHWHVIMARKY                                                                                                                |
|          | <i>Amborella trichopoda v1.0</i> | evm_27.model.AmTr_v1.0_scaffol<br>d00139.15  | Atr2R-MYB50 | KAHTNKGAWTKEEDQRLIAYIRAHGEGCWRSPLKAAAGLLRCGKSCRLRWINYLRLPDLKRGNFTEEEDELIKHLHSLGKWSLIAGRLPGRTDNEIKNYWNTHIKRL                                                                                                                   |
|          | <i>Amborella trichopoda v1.0</i> | evm_27.model.AmTr_v1.0_scaffol<br>d00145.39  | Atr2R-MYB51 | MACIEIRKGPWTEQEDLQLVCYVGLFGERRWDFIAKVSGLNRSKSCRLRWVNYLRLPDLKRGKITPQEECLLDLQSRWGNRWSRIARKLPGRTDNEIKNYWRTHMRKKA                                                                                                                 |
|          | <i>Amborella trichopoda v1.0</i> | evm_27.model.AmTr_v1.0_scaffol<br>d00186.1   | Atr2R-MYB52 | QKSSPRGHWRPGEDEKLRLVEQYGPQNWNSIAEKLQGRSGKSCRLRWFNQLDPRINRRPFTPEEEERLLSAHRHHGNKWALIARLFPGRTDNAVKNHWHVIMARKH                                                                                                                    |
|          | <i>Amborella trichopoda v1.0</i> | evm_27.model.AmTr_v1.0_scaffol<br>d01267.1   | Atr2R-MYB53 | IEERRRGPWMEEDIKLAMSVKLGERRWDHIAQVSGLKRSGKSCRLRWNYLRLPDLKQGRMTAQEECLVLQLHAQWGNKWSRIARRLPGRTDNEIKNYWRTHLRKEA<br>EDELNRNAVNYFKGKSWKIAAYFPHRSEVQCLHRWQKVLNPELVKGPWTKEEDDMIKLVKYGAKKWSVIAQSLPGRIGKQCRERWHNHLNPEIKKDAWTVEEELALIRAHQ |
|          | <i>Amborella trichopoda v1.0</i> | evm_27.model.AmTr_v1.0_scaffol<br>d00012.146 | Atr3R-MYB1  | SYGNRWAEIAKFLPGRTDNSIKNHWSYLKKKL<br>TRRSTKGGWTPPEDEILRKA VHYNGKNWKKIAAFFTRDTRDVQCLHRWQKVLNPDVVKGPWSKEEDDMIELVRQHGAKKWSVIAQALPGRIGKQCRERWHNHLNPAISKEAW                                                                         |
|          | <i>Amborella trichopoda v1.0</i> | evm_27.model.AmTr_v1.0_scaffol<br>d00109.47  | Atr3R-MYB2  | TQEEELALIRAHQYGNKWAELAKFLPGRTDNAIKNHWSLKKL<br>TKRSTKGNWTEEDAILMQAVKQFNGKNWKQIAKCFNDRADVQCLHRWQKVLNPDVVKGPWTKEEDDEIVKQVEKLGTKKWSVVAQSLPGRIGKQCRERWYNQLNPAIKKE                                                                  |
|          | <i>Amborella trichopoda v1.0</i> | evm_27.model.AmTr_v1.0_scaffol<br>d00009.357 | Atr3R-MYB3  | PWTQEEEDCVLIHAHQYGNKWAELAKFIPGRTDNSIKNYWNCTMKKKL                                                                                                                                                                              |
| Monocots | <i>Zea mays</i>                  | AC217264.3_FGT005                            | Zm2R-MYB001 | PVVLKKGWPTASEDAMLMDHVRHHGEGNWNNAVQRMTGLLRCGKSCRLRWNLHLPNKKGSFSPDEELLIAQLHAQLGNKWARMMAAHLPGRTDNEIKNYWNTTRTKRRQ                                                                                                                 |
|          | <i>Zea mays</i>                  | GRMZM2G024468_T01                            | Zm2R-MYB002 | KAGLKKGPWSPEEDLLVSYVQEHGPGNWRAVPCSTGLMRCGKSCRLRWNYLRLPGIKRGSFSDQEEKLIHLLQELLGNKWSAIASYPERTDNDIKNYWNTHLKKKL                                                                                                                    |
|          | <i>Zea mays</i>                  | GRMZM2G037650_T01                            | Zm2R-MYB003 | KEGVKRGWPTAEEDKLLIFILTHGRCCWRAVPKLAGLLRCGKSCRLRWNYLRLPDLKRGLLSTAEELVIDLHAKLGNRWSQIAAKLPGRTDNEIKNHWNTHIKKKL                                                                                                                    |
|          | <i>Zea mays</i>                  | GRMZM2G046443_T01                            | Zm2R-MYB004 | SAWVRKGPWTEDEDEVLRHRHVMENGPRESWSSIRSKGLLPRTGKSCRLRWVNLKRPDIKKGCKFSADEERVIDLQAQFGNKWARIATYLSGRTDNDVKNFWSTRQKRLA                                                                                                                |
|          | <i>Zea mays</i>                  | GRMZM2G054111_T01                            | Zm2R-MYB005 | QEGWRKGPWTALEDRLLETVYVQHGEGSWSVAKLTGLRRSGKSCRLRWVNYLRLPDLKRGKITPDEETVILQLHAMLGNRWSAIARCLPGRTDNEIKNYWRTHFKKAR                                                                                                                  |
|          | <i>Zea mays</i>                  | GRMZM2G057027_T02                            | Zm2R-MYB006 | KVGLKRGRWTAEDQLLANIYAEHGECSWRSPLKAGLLRCGKSCRLRWINYLRLADVVRGNISKEEEDIIKHLATLGNRWSLIASHLPGRTDNEIKNYWNSHLSRQI                                                                                                                    |
|          | <i>Zea mays</i>                  | GRMZM2G070849_T01                            | Zm2R-MYB007 | AGELRRGPWTEEDLQLVNYVDAHGEGRWNSLARSAGLKRGTGKSCRLRWNYLRLPDLRGNITPQEQMLMELHSRWSKIAQHLPGRTDNEIKNYWRTRVQKHA                                                                                                                        |
|          | <i>Zea mays</i>                  | GRMZM2G077147_T01                            | Zm2R-MYB008 | MCTRGHWRPSEDEKLKELVALYGFHNWNAIAEKLQGRSGKSCRLRWFNQLDPRINRSPFSEEEELLLASHRVHGNRWAVIARLFPGRTDNAVKNHWHVIMARRC                                                                                                                      |
|          | <i>Zea mays</i>                  | GRMZM2G079123_T01                            | Zm2R-MYB009 | KIGLKKGPWTPPEEDQLLAYIQEHGHGSRWALPVKAGLQRCGKSCRLRWNYLRLPDIKRGKFSLQEEQTIQLHALLGNRWSAIATHLPNRTDNEIKNYWNTHLKKKL                                                                                                                   |
|          | <i>Zea mays</i>                  | GRMZM2G084583_T01                            | Zm2R-MYB010 | KAHTNRGAWTKEEDERLVAIYIRAHGEGCWRSPLKAAAGLLRCGKSCRLRWINYLRLPDLKRGNFTEDEEDLIVKLHSLGKWSLIAARLPGRTDNEIKNYWNTHVRRKL                                                                                                                 |
|          | <i>Zea mays</i>                  | GRMZM2G084799_T01                            | Zm2R-MYB011 | KVGLKRGRWTAEDQLLANIYAEHGECSWRSPLKAGLLRCGKSCRLRWINYLRLADVVRGNISKEEEDIIKHLATLGNRWSLIASHLPGRTDNEIKNYWNSHLSRQI                                                                                                                    |
|          | <i>Zea mays</i>                  | GRMZM2G106558_T02                            | Zm2R-MYB012 | KVGLKKGPWTAEDQKLVFILGNRQCCWRAVPKLAGLLRCGKSCRLRWNYLRLPDLKRGLLSDAEELVIDLHAQLGNRWSKIASHPGRTDNEIKNHWNTHIKKKL                                                                                                                      |
|          | <i>Zea mays</i>                  | GRMZM2G110135_T01                            | Zm2R-MYB013 | ENGLKKGPWTPPEEDQLLHYIQKNGHGSWRTLPRLAGLNRCGKSCRLRWNYLRLPDIKRGKFSREEEQTIHLHLSVGNKWSAIATHLPGRTDNEIKNFNTHLKRL                                                                                                                     |
|          | <i>Zea mays</i>                  | GRMZM2G121570_T01                            | Zm2R-MYB014 | RAQHKKGPWTEAEDVVLREVMKHKHGRKWA VIAQSLPGRVQKQCRERWNTNHLRPLDKKSVWTEEDMALIKAHKRCGNHWSTIATFLPGRSENAVKNHWNATKRSK                                                                                                                   |
|          | <i>Zea mays</i>                  | GRMZM2G130149_T01                            | Zm2R-MYB015 | REETRKGWTEQEDLQLVCTVRLFGERRWDFIAKVSGLNRTGKSCRLRWVNYLHPLKRGKGRMSPEERLILELHARWGNRWSRIARRLPGRTDNEIKNYWRTHMRKKA                                                                                                                   |
|          | <i>Zea mays</i>                  | GRMZM2G131937_T01                            | Zm2R-MYB016 | KGGVKKGPWTPPEEDLVLVSYVQDHGPGNWRAVPTNTGLMRCGKSCRLRWNLHLPDIKCGNFSQDEEKLIIHLQALLGNRWAAIASYMPERTDNDIKNYWNTHLKKKF                                                                                                                  |
|          | <i>Zea mays</i>                  | GRMZM2G143046_T01                            | Zm2R-MYB017 | KPELRRGPWTVDEDLTLVNYIADNGEGRWNNLARAAGLKRGTGKSCRLRWNYLRLPDKRGNFSADEQLLIDLHTRWGNRWSKIAQHLPGRTDNEIKNYWRTRVQKHA                                                                                                                   |
|          | <i>Zea mays</i>                  | GRMZM2G147346_T01                            | Zm2R-MYB018 | KEGLRRGAWSAEEDQRLVAYVRQNGHPNWRALPRQAGLLRCGKSCRLRWINYLRLPDIKRGNFTEDEEALIVRLHRELGNRWSAIAAQLPGRTDNEIKNVWHTHIKRL                                                                                                                  |
|          | <i>Zea mays</i>                  | GRMZM2G147698_T01                            | Zm2R-MYB019 | KKKLRRGLWSPEEDEKLMNHIAKYGHGCVSSVPKLAGLDRCGKSCRLRWINYLRLPDLKRGTFQEEEDLIIHLHSLGKWSQIAAQLPGRTDNEIKNFVNSYIKKRL                                                                                                                    |
|          | <i>Zea mays</i>                  | GRMZM2G308034_T01                            | Zm2R-MYB020 | KANVKKGPWTPPEEDAKLLAYTSTHGTGNWNTVNPQAGLKRKCGKSCRLRYTNYLRLPNLKHENFTQEEEDLIVLHAMLGSRWSLIANQLPGRTDNDVKNYWNKLSKLL                                                                                                                 |
|          | <i>Zea mays</i>                  | GRMZM2G403620_T01                            | Zm2R-MYB021 | MKERQRWRPEEDAVLRAVYRQYGPREWHLVSQRMNVALDRDAKSLERWKNYLRLPGIKKGSLEEEQRLVIRLQAKHGNKWKIAAEVPGRTAKRLGKWWVFEKQ                                                                                                                       |
|          | <i>Zea mays</i>                  | GRMZM2G428555_T01                            | Zm2R-MYB022 | SRLAARGHWRPAEDAKLRELVALYGPQNWNLIAEKLDRSGKSCRLRWFNQLDPRISKRPFSEEEERLMAAHRFYGNKWKWAMIARLFPGRTDNAVKNHWHVIMARKY                                                                                                                   |
|          | <i>Zea mays</i>                  | GRMZM5G870592_T01                            | Zm2R-MYB023 | KANVVKGPWTPPEEDRKLKVLVEQFGLRKWSYIAQLLQPARVQKQCRERWHNHLRPNIKKDIWSDDEEDMLIEAHKEVGNKWAELAKRPLPGRTDNSIKNHWNATKRRQF                                                                                                                |
|          | <i>Zea mays</i>                  | AC165178.2_FGT004                            | Zm2R-MYB024 | KVGKKGWTPPEEDLMLVSYVQEHGPGNWRAVPTNTGLMRCGKSCRLRWNYLRLPGIKRGNFTDQEEKLIHLLQALLGNRWAAIASYMPERTDNDIKNYWNTHLKKKL                                                                                                                   |
|          | <i>Zea mays</i>                  | GRMZM2G032655_T01                            | Zm2R-MYB025 | KEGLKKGPWTPPEEDQLLAYIEQHGHGCSWRSPLKAGLQRCGKSCRLRWNYLRLPDIKRGKFSLQEEQTIQLHALLGNRWSAIATHLPKRTDNEIKNYWNTHLKRL                                                                                                                    |
|          | <i>Zea mays</i>                  | GRMZM2G038722_T01                            | Zm2R-MYB026 | KVGLNKGWTPPEEDMRLVAIYQKYGHANWRALPKQAGLLRCGKSCRLRWINYLRLPDLKRGNFSAEEETVIKLHGLLGNKWSKIASCLPGRTDNEIKNVWNTHLKRV                                                                                                                   |
|          | <i>Zea mays</i>                  | GRMZM2G048295_T01                            | Zm2R-MYB027 | KMGLKKGPWTPPEEDKLVVAHIQSFHGSNWRALPKQAGLLRCGKSCRLRWINYLRLPDIKRGNFSAEEEDAIHSLHEQLGNRWSAIAARLPGRTDNEIKNVWNTHLKRL                                                                                                                 |
|          | <i>Zea mays</i>                  | GRMZM2G050305_T01                            | Zm2R-MYB028 | KAHTNKGAWTKEEDERLVAHIRAHGEGCWRSPLKAAAGLLRCGKSCRLRWINYLRLPDLKRGNFTEEEDELIVKLHSLVGNKWSLIAGRLPGRTDNEIKNYWNTHIRKRL                                                                                                                |
|          | <i>Zea mays</i>                  | GRMZM2G064630_T01                            | Zm2R-MYB029 | RKDRHIVSWSSEEDGLRAQIALHGTDNWTIIAAQFKDKTARQCRRRWYNYLNSCKKGGWSREEDMLLCEAQKVLGNKWTIEAKVVSGRTDNAVKNRSTLCKRRA                                                                                                                      |
|          | <i>Zea mays</i>                  | GRMZM2G087955_T01                            | Zm2R-MYB030 | GVDRIKGPWSPEEEDLQRLVRRHGARNWSLISRSVPGRSKSCRLRWCNQLSPRVEHRPFTPEDEEDAILRAHARFGNKWATIARLLSGRTDNAIKNHWNSTLKRER                                                                                                                    |
|          | <i>Zea mays</i>                  | GRMZM2G090837_T01                            | Zm2R-MYB031 | KASVKKGPWSPEEDRKLKEYIDENGTGGNWIALPHKAGLKRKCGKSCRLRWNYLRLPNLKHGDFSDDEEDRIICSLFATIGSRWSIIAQLPGRTDNDIKNYWNTKLLKLL                                                                                                                |
|          | <i>Zea mays</i>                  | GRMZM2G105137_T01                            | Zm2R-MYB032 | CEAVRKGHWTAEDGVLLEHVRVHGPRDWSFIRSKGLLPRTGKSCRLRWVNLKRPDLKGTGCKFSAEERVIDLQAQFGNKWARIATYLPGRTDNDVKNFWSTRQKRLA                                                                                                                   |
|          | <i>Zea mays</i>                  | GRMZM2G115859_T01                            | Zm2R-MYB033 | KATVKKGPWPEEDAVLKGHIDEHAGGNWVQLPHKIGLNRGKSCRLRWNYLRLPNIRHGGFTEDEDRILCSLYISIGSRWATIAAQLPGRTDNDVKNHWNTHLKRRL                                                                                                                    |
|          | <i>Zea mays</i>                  | GRMZM2G123202_T01                            | Zm2R-MYB034 | SNGIKKGQWALEEDKLLVDYVQANGAGNWRMLPKLAGLNRCGKSCRLRWNYLRLPDIKRGHFTPEEHNSILQLHAIIGNRWSTIAAQLPGRTDNEIKNYWNTHMKQQL                                                                                                                  |
|          | <i>Zea mays</i>                  | GRMZM2G124715_T01                            | Zm2R-MYB035 | QAHTNKGAWTKEEDQRLIAYIKAHGEGCWRSPLKAAAGLLRCGKSCRLRWINYLRLPDLKRGNFSEEEDELIKFHELFGNKWSLIAGRLPGRTDNEIKNYWNTHIKRL                                                                                                                  |

|                 |                   |             |                                                                                                                                                                                                                                                            |
|-----------------|-------------------|-------------|------------------------------------------------------------------------------------------------------------------------------------------------------------------------------------------------------------------------------------------------------------|
| <i>Zea mays</i> | GRMZM2G139284_T01 | Zm2R-MYB036 | KEGVKKGWPTPEEDLVLVSYIQDHGPGNWRAVPTRTGLMRCSSKSCRLRWNTNLRPGIRRGNFTEQEEKLIVHLQALLGNRWAAIASYLPERTDNDVKNYWNTHLKRKL                                                                                                                                              |
| <i>Zea mays</i> | GRMZM2G166337_T01 | Zm2R-MYB037 | RSGLKKGWPTPEEDEKLVAYIKKHGQGNWRTLPKNAGLARCGKSCRLRWNTNLRPDIKRGRFSFEEEEAIQLHSILGNKWSAIAARLPGRTDNEIKNYWNTHIRKRL<br>AGDLRRGPWTVVEEDMLLVNYVAAHGEGRWNALARCAGTRCCMLVATLRDDDDQTNNTMNCAYAGLRRTGKSCRLRWLNLRPDLRRGNITAQEQLLILELHSRWGNRWSKIA<br>QHLPGRTDNEIKNYWRTRVQKHA |
| <i>Zea mays</i> | GRMZM2G176327_T01 | Zm2R-MYB038 | RAAVKRGWSPPEEALRSYVQRHGSGGNWITMPKAGLRKRCGKSCRLRWLNLRPDIRHGGFTAEEDA VIMSLYAQLGSKWSLIASQMEGRDNDVKNHWNTLKKRL                                                                                                                                                  |
| <i>Zea mays</i> | GRMZM2G01875_T01  | Zm2R-MYB039 | KQKLRKGLWSPEEDEKLMNHITKHGHGCWSTVPKLAGLRQCGKSCRLRWLNLRPDLKRGAFSEEEEDLIVELHVLGNRWSQIATRLPGRTDNEIKNLWNSSIKKKL                                                                                                                                                 |
| <i>Zea mays</i> | GRMZM2G017520_T01 | Zm2R-MYB040 | KAHTNKGAWTKEEDQLVA YIKAHGEGCWRSPLKAAGLLRCGKSCRLRWLNLRPDLKRGNFTEQEEEDVVIKHLQVLGNKWSLIAAQLPGRTDNEIKNYWNTHIRKRL                                                                                                                                               |
| <i>Zea mays</i> | GRMZM2G041415_T01 | Zm2R-MYB041 | REETRKGWTEQEDLQVCTVRLFGERRWDFIAKVSGLNRTGKSCRLRWVNYLHPGLKGRMSPEERLILELHARWGNRWSRIARRLPGRTDNEIKNYWRTHMRKKA                                                                                                                                                   |
| <i>Zea mays</i> | GRMZM2G047626_T01 | Zm2R-MYB042 | KVGLKKGWTKEEDEVLYRIKEHGECSWRSPLKAGLLRCGKSCRLRWLNLRAGLKRGNISEEEEDMIKHLHATLGNRWSLIAGHLPGRTDNEIKNYWNSHLSRRA                                                                                                                                                   |
| <i>Zea mays</i> | GRMZM2G051256_T01 | Zm2R-MYB043 | EKKVRKGLWSPEEDERLASHIARFVSCWSSIPELAGLRQCGKSCRLRWVNYLHPGLKGRMSPEERLILELHARWGNRWSRIARRLPGRTDNEIKNYWRTHMRKKA                                                                                                                                                  |
| <i>Zea mays</i> | GRMZM2G052377_T01 | Zm2R-MYB044 | PPKLRRGLWSPEEDEKLYNHIIRYGVGCWSSVPKLAGLERCGKSCRLRWLNLRPDLKRGFSFQEEEDLIVSLHKLGNRWSQIASQLPGRTDNEIKNFVNSCICKKL                                                                                                                                                 |
| <i>Zea mays</i> | GRMZM2G064744_T01 | Zm2R-MYB045 | RAGHARGHWRPAEDAKLKDVALYGPKNWNLIASKLHGRSGKSCRLRWVNFQDPRVNRPPFSAEEQRLVA AHRAHGNKWALIARLPGRTDNAVKNHWVLTARRQ                                                                                                                                                   |
| <i>Zea mays</i> | GRMZM2G088783_T01 | Zm2R-MYB047 | KQKVRGLWSPEEDEKLVKYYTAHGHGCWSSVPRQAGLRQCGKSCRLRWLNLRPDLKRGFSFQEEALIVELHRLVGNRWAQIAKHLPGRTDNEVKNFVNSTIKKKL                                                                                                                                                  |
| <i>Zea mays</i> | GRMZM2G11731_T01  | Zm2R-MYB048 | GKLCARGHWRPAEDAKLVELVAQYGPQNWNLIAERLDGRSGKSCRLRWVNFQDPRINRRAFSGEEERLLAAHRA YGNKWALIARLPGRTDNAVKNHWVLMARKQ                                                                                                                                                  |
| <i>Zea mays</i> | GRMZM2G139688_T01 | Zm2R-MYB049 | GTPLKKGWPTS AEDAILVDYVKKNGEGNWNVAQKNTGLFRGKSCRLRWANHLRPNLKKGAFTPEEERLIQLHAKMGNKWARMAGHLPGRTDNEIKNYWNTRIKRCQ                                                                                                                                                |
| <i>Zea mays</i> | GRMZM2G143328_T01 | Zm2R-MYB050 | EPAVRKGPWTVLEEDLIVSYISQHGEGSWDNLARAAGLNRCGKSCRLRWLNLRPGVRRGSITAGEDTVIRELHARWGNKWSKISKHLPGRTDNEIKNYWRTRIQKK                                                                                                                                                 |
| <i>Zea mays</i> | GRMZM2G158700_T01 | Zm2R-MYB051 | AAELRRGPWTVDEEDALLAAHVA AHGEGRWNELARDAGLRRTGKSCRLRWLNLRPGVRRGGFTPREQLLIDLHRSRWGNRWSKIAAHLPGRTDNEVKNYWRTRVQKHA                                                                                                                                              |
| <i>Zea mays</i> | GRMZM2G160838_T01 | Zm2R-MYB052 | KAHTNKGAWTKEEDQLIA YIRAHGEGSWRSPLKAAGLLRCGKSCRLRWVNYLHPGLKGRMSPEERLILELHARWGNRWSRIARRLPGRTDNEIKNYWRTHMRKKA                                                                                                                                                 |
| <i>Zea mays</i> | GRMZM2G160840_T01 | Zm2R-MYB053 | KPELRRGPWTVDEEDHILVNYIADNGEGRWNSLARAAGLRKRTGKSCRLRWLNLRPDLKRGNFTEQEEEDLILDLHTRWGNRWSKIAQHLPGRTDNEIKNYWRTRVQKHA                                                                                                                                             |
| <i>Zea mays</i> | GRMZM2G162709_T01 | Zm2R-MYB054 | MVELRRGPWTVLEEDNLLMNYIACHGEGRWNLARCSGLKRTGKSCRLRWLNLRPKDKRGNLAPAEQLLILELHSGWGNRWSRIAQHLPGRTDNEIKNYWRTRVQKQA                                                                                                                                                |
| <i>Zea mays</i> | GRMZM2G167829_T01 | Zm2R-MYB055 | KTKVVRGPWSQEEEDAVLRSFVQRFNAGNWIALPQKAGLRKRCGKSCRLRWLNLRPELHGGFTDEEDSLLSLYGEIGSKWSVIASRLPGRTDNDVKNYWNTHLKKRY                                                                                                                                                |
| <i>Zea mays</i> | GRMZM2G369799_T01 | Zm2R-MYB056 | AVEVKKGSWSPEEDALLTRLVEQHGHWRSLISAPIGRSGKSCRLRWVNFQDPRVNRPPFSAEEQRLVA AHRAHGNKWALIARLPGRTDNAVKNHWVMMARKS                                                                                                                                                    |
| <i>Zea mays</i> | GRMZM2G460869_T01 | Zm2R-MYB057 | GKHIVRGHWRSEFEDEKLKELVAQYGPKNWWSHISKLEGRSGKSCRLRWVNFQDPRVNRPPFSAEEQRLVA AHRAHGNKWALIARLPGRTDNAVKNHWVMMARKS                                                                                                                                                 |
| <i>Zea mays</i> | GRMZM2G470307_T01 | Zm2R-MYB058 | NPVLKKGWSPKEEDEIIVQMVNKYGPKKWSAIAQALPGRIGKQCRERWHNHLNPAINKEAWTQEEIITLIHAHRMYGNKWAE LTKFLPGRTDNAIKNHWNSSVKKKV                                                                                                                                               |
| <i>Zea mays</i> | GRMZM5G803355_T01 | Zm2R-MYB059 | RARPSRGHWRPGEEDKLRQLVDKYGPRNWSNIAESLEGRSGKSCRLRWVNFQDPRVNRPPFSAEEQRLVA AHRAHGNKWALIARLPGRTDNAVKNHWVMMARRR                                                                                                                                                  |
| <i>Zea mays</i> | GRMZM2G011422_T01 | Zm2R-MYB060 | KATVKKGPWSPPEEDAMLSYIEEHGTGGNWIALPHKIGLRKRCGKSCRLRWLNLRPNIKHGDFTPEEDGVICSLYISIGSRWSIAAQLPGRTDNDVKNYWNTHLKKRL                                                                                                                                               |
| <i>Zea mays</i> | GRMZM2G015021_T01 | Zm2R-MYB061 | KASVKKGPWSPDEDAKLYAIEEHGTGGNWIALPHKIGLRKRCGKSCRLRWLNLRPNIKHGDFTPEEEHICSLYISIGSRWSIAAQLPGRTDNDIKNYWNTHLKKKL                                                                                                                                                 |
| <i>Zea mays</i> | GRMZM2G017268_T01 | Zm2R-MYB062 | ENGLKKGWPTQEEDEKLLHYIQKNGHGSWRTLPRLAGLNRCGKSCRLRWNTNLRPDIKRGKFSQEEEQITILHLHSLVGNKWSAIAATHLPGRTDNEIKNYWNTHLKKRL                                                                                                                                             |
| <i>Zea mays</i> | GRMZM2G043792_T01 | Zm2R-MYB063 | EGGWRKGPWTAQEDKLLVEYVRQHGEGRWNSVAKLTGLKRSKSCRLRWVNYLHPGLKGRMSPEERLILELHARWGNRWSRIARRLPGRTDNEIKNYWRTHMRKKA                                                                                                                                                  |
| <i>Zea mays</i> | GRMZM2G055158_T01 | Zm2R-MYB064 | KIGIKKGPWTAEDQKLVTFLLSHGHCCWRLVPLKLAGLLRCGKSCRLRWNTNLRPDLKRGLLSEEEALVIDLHAQLGNRWSKIAARLPGRTDNEIKNHWNTHIKKKL                                                                                                                                                |
| <i>Zea mays</i> | GRMZM2G089244_T01 | Zm2R-MYB065 | QAHTNKGAWTKEEDQLVA YIKAHGEGCWRSPLKAAGLLRCGKSCRLRWLNLRPDLKRGNFTEEEDDLIKFHELFGNKWSLIAGRLPGRTDNEIKNYWNTHIRKRL                                                                                                                                                 |
| <i>Zea mays</i> | GRMZM2G108959_T01 | Zm2R-MYB066 | GVGKKGWPTPEEDIVLVS YIQHGHGPNWRSVPENTGLMRCSSKSCRLRWNTNLRPGIKRGNFTPHEEIIIHLQALLGNKWSAIAAS YLPQRTDNDIKNYWNTHLKKKV                                                                                                                                             |
| <i>Zea mays</i> | GRMZM2G111045_T01 | Zm2R-MYB067 | NKGLKKGWPTPEEDKLLVDYIQTNGHGSWRLLPKLAGLNRCGKSCRLRWNTNLRPDIKRGKFSQEEEQITILHLHSLVGNKWSAIAATHLPGRTDNEIKNYWNTHLKKQL                                                                                                                                             |
| <i>Zea mays</i> | GRMZM2G111117_T01 | Zm2R-MYB068 | KIGLKKGWPTPEEDEKLLAFVEEHGHSWRALPAKAGLRQCGKSCRLRWNTNLRPDIKRGKFSQEEEQITILHLHSLVGNKWSAIAATHLPGRTDNEIKNHWNTHLKKRL                                                                                                                                              |
| <i>Zea mays</i> | GRMZM2G127857_T01 | Zm2R-MYB069 | KMGLKRGWPTAEEDRILVAHVERHGHSNWRALPKQAGLLRCGKSCRLRWLNLRPDLKRGNFTEEEDDLIKFHELFGNKWSLIAGRLPGRTDNEIKNYWNTHIRKRL                                                                                                                                                 |
| <i>Zea mays</i> | GRMZM2G131442_T01 | Zm2R-MYB070 | DEELRRGPWTVDEEDLTIN IADHGEGRWNALARAAGLRKRTGKSCRLRWLNLRPDLKRGNFTEEEDDLIKFHELFGNKWSLIAGRLPGRTDNEIKNYWRTRVQKHA                                                                                                                                                |
| <i>Zea mays</i> | GRMZM2G138427_T01 | Zm2R-MYB071 | KQGVKRGWPTAEEDKLLSIFLTHGQCCWRAVPLKLAGLLRCGKSCRLRWNTNLRPDLKRGLLSTAEQQLVIDLHAMLGNRWSKIAAQLPGRTDNEIKNHWNTHIKKKL                                                                                                                                               |
| <i>Zea mays</i> | GRMZM2G162434_T01 | Zm2R-MYB072 | KEGKKGWPTPEEDIILVSYIQEHGPGNWRVSPINTGLMRCSSKSCRLRWNTNLRPGIRRGNFTEQEEKLIVHLQALLGNRWAAIASYLPQRTDNDIKNYWNTHLKKKL                                                                                                                                               |
| <i>Zea mays</i> | GRMZM2G419239_T01 | Zm2R-MYB073 | KAHTNRGAWTKEEDERLVA YVRAHGEGCWRSPLPRAAGLLRCGKSCRLRWLNLRPDLKRGNFTEEEDDLIVKLHSLGNKWSLIAARLPGRTDNEIKNYWNTHIRKRL                                                                                                                                               |
| <i>Zea mays</i> | GRMZM2G496770_T01 | Zm2R-MYB074 | KPSYRKGLWSPEEDKLRDYILLHGHGCWSALPAKAGLRNRCGKSCRLRWLNLRPDLKRGNFTEEEDDLIKFHELFGNKWSLIAGRLPGRTDNEIKNYWRTHMRKKA                                                                                                                                                 |
| <i>Zea mays</i> | GRMZM5G833253_T01 | Zm2R-MYB075 | KVGLNRGSWTPQEDMRLIA YIQKHGHTNWRALPKQAGLLRCGKSCRLRWLNLRPDLKRGNFTEEEDDLIKFHELFGNKWSLIAGRLPGRTDNEIKNYWRTHMRKKA                                                                                                                                                |
| <i>Zea mays</i> | GRMZM2G048136_T01 | Zm2R-MYB076 | REEMRKGWTEQEDIQLVCTVRLFGDHRWDFIAQVSGLNRTGKSCRLRWVNYLHPGLKGRMSPEERLILELHARWGNRWSRIARRLPGRTDNEIKNYWRTHMRKKA                                                                                                                                                  |
| <i>Zea mays</i> | GRMZM2G001223_T03 | Zm2R-MYB077 | EAGLKKGWPTSEEDQKLLAFIEQHGHGCWRSPLPAKAGLRRCGKSCRLRWNTNLRPDIKRGKFTLQEEQITILHLHSLVGNKWSAIAATHLPGRTDNEIKNYWNTHLKKRL                                                                                                                                            |
| <i>Zea mays</i> | GRMZM2G027697_T01 | Zm2R-MYB078 | EGGWRKGPWTAQEDKLLVEYVRQHGEGRWNSVAKLTGLKRSKSCRLRWVNYLHPGLKGRMSPEERLILELHARWGNRWSRIARRLPGRTDNEIKNYWRTHMRKKA                                                                                                                                                  |
| <i>Zea mays</i> | GRMZM2G040924_T01 | Zm2R-MYB079 | TKGLKKGWPTPEEDKLLVDYIQTNGHGSWRLLPKLAGLNRCGKSCRLRWNTNLRPDIKRGKFTLQEEQITILHLHSLVGNKWSAIAATHLPGRTDNEIKNYWNTHLKKQL                                                                                                                                             |

|          |                   |             |                                                                                                                  |
|----------|-------------------|-------------|------------------------------------------------------------------------------------------------------------------|
| Zea mays | GRMZM2G070523_T01 | Zm2R-MYB080 | PVVLKKGWPTAAEDAMLDHVRHHGEGNWNVAQRVTGLLRCGKSCRLRWTHNLRPNLKKGSFSPDEELLIAQLHAQLGNKWARMAAHLPGRTDNEIKNYWNTTRTKRRQ     |
| Zea mays | GRMZM2G073836_T01 | Zm2R-MYB081 | SSKNKKHRWSSEDEALKQMVKKYGTKNWRTIACIPGRNANSCLSRWKYLLDPAINKEPWSQEEELRLIRAQQVYGNKWCKMVKHFPGRTNDALKEHWRSPMKRKL        |
| Zea mays | GRMZM2G088189_T01 | Zm2R-MYB082 | KMNYRKGLWSPEEDQRLRDYILKHGLGCWSAVPAKAGLQRNGKSCRLRWINYLRPGLKRGMFSEEEEDVVIDLQAKLGNKWSQIAMHLPGRTDNEVKNYWNSYLKRRV     |
| Zea mays | GRMZM2G095904_T01 | Zm2R-MYB083 | KMGLKRGPWTPPEEDRILVAHIERHGHSNWRALPKQAGLPRCGKSCRLRWINYLRPDIKRGNFREEEDA VIQLHQMLGNRWSAIAARLPGRTDNEIKNVWHTLKKRL     |
| Zea mays | GRMZM2G104789_T01 | Zm2R-MYB084 | KATVKKGPWSPEEDAKLSYIEQNGTGGNWIALPQKIGLKRCGKSCRLRWLNLYLRPNIKHGGFSDDEEMILSLYISIGSRWSIIAQLPGRTDNDIKNYWNTLKKKL       |
| Zea mays | GRMZM2G145444_T01 | Zm2R-MYB085 | ECDRIKGPWSPEEDEALRRLVERHGARNWTAIGRGIPGRSGKSCRLRWCNQLSPQVERRPFTPEEDAAILAAHARLGNRWAAIARLLPGRTDNAVKNHWNSSLKRKL      |
| Zea mays | GRMZM2G159547_T01 | Zm2R-MYB086 | ENGLKKGWTPPEEDQKLMEYIQKNGHGSWRALPRLAGLNRCGKSCRLRWNTYLRPDIKRGKFTQEEEQITLQLHSVLGNKWSAIAKHLPGRTDNEIKNFWNTHLKKKL     |
| Zea mays | GRMZM2G161512_T01 | Zm2R-MYB087 | SGGLKKGWPTQAEDKLLRDHVRHHGEGNWNVAVRRETRLQRCGKSCRLRWANHLRPNLRKCPFSPEEERQILLHGLIGNKWARISKHLSGRTDNEIKNYWNTFRKRRQ     |
| Zea mays | GRMZM2G170049_T01 | Zm2R-MYB088 | KPNYRKGLWSPEEDQKLRDYILLHGHGCWSALPAKAGLQRNGKSCRLRWINYLRPGLKHGMFSPEEEETVMSLHATLGNKWSRIARHLPGRTDNEVKNYWNSYLKRRV     |
| Zea mays | GRMZM2G302549_T01 | Zm2R-MYB089 | NNEFILGNFDRKLKVLVEQFGLRWYSYIAQLLPGRVGKQCRERWHNHLRPNIKKDIWNDEEDSVLIQAHKEVGNRWAEIAKRLPGRTDENSINKHNWNTKRRQF         |
| Zea mays | GRMZM2G455869_T01 | Zm2R-MYB090 | MCTRGHWRPSEDEKELVALYGPHNWNIAEKLQGRSGKSCRLRWFNQLDPRINRSPFSEQEEALLASHRVHGNRWAVIARLPGRTDNAVKNHWVIMARRC              |
| Zea mays | GRMZM2G013581_T01 | Zm2R-MYB091 | GAAMRKGWTPDEEDQLVRFVRLFGERRWDFLAKVSGLRRTGKSCRLRWVNYLHPGLRRGRITADEERRIVELHAQWGSRWSRIARSLPGRTDNEIKNFWRTRTRKKA      |
| Zea mays | GRMZM2G048910_T01 | Zm2R-MYB092 | KVGKKGWPTAEEDQKLVGFLTHGHCCWRVVPKLAGLLRCGKSCRLRWNTYLRPDLKRGLSDDEERLVIDLHAQLGNRWSKIAAQLPGRTDNEIKNHWNTHIRKKL        |
| Zea mays | GRMZM2G069325_T02 | Zm2R-MYB093 | KASVKRGPWSPEEDEQLRSYVQLNGIGGNWIALPQKAGLNRCGKSCRLRWLNLYLRPNIKHGGYTDDEEDRIIWSLYSSIGSRWSIIASKLPGRTDNDVKNYWNTHLKKKA  |
| Zea mays | GRMZM2G077789_T01 | Zm2R-MYB094 | KAHTNKGAWTKEEDERLVA YVRAHGEWCWRSPLKAAAGLLRCGKSCRLRWNYLRPDLKRGNFDTDEDELIRLHSLGNKWSLIAGQLPGRTDNEIKNYWNTHIRKRL      |
| Zea mays | GRMZM2G078820_T01 | Zm2R-MYB095 | ERDRIRGPWSPEEDEALRRLVERHGARNWTAIGRGVPGRSKSCRLRWCNQLSPRVARRPFTADEDAIARAHARLGNRWAAIARLLPGRTDNAVKNHWNSLKRKL         |
| Zea mays | GRMZM2G093647_T01 | Zm2R-MYB096 | GSRRVNRPWTPPEDELLRAVARHGPRKWPELSADIPGRCGKSCRRRWVEHLSPLGLEHRAFTPEEDA VIVAAQAKHGKNWATIARMLPGRTDNSIKNRWNFALQQQC     |
| Zea mays | GRMZM2G093660_T01 | Zm2R-MYB097 | GSGRVTRRWTPPEEDLLRAVARHGPRKWPELSVDIPGRSGRSCHRRVWVQHLSPGLERRAFTPEEDA VIVAAQAMYGNKWTTIARMLPGRTRTDISIKNRWNSALQQHC   |
| Zea mays | GRMZM2G093789_T01 | Zm2R-MYB098 | TPQMKKGPWSPEEDKRLKDYVEVHGAGNWNKVQQNARLNRCGKSCRLRWTHNLRPDLKKEPFNAEEEEKIILHIRRGPKWSMMASYLPGRTDNEIKNFWNTRKRRKQ      |
| Zea mays | GRMZM2G102790_T01 | Zm2R-MYB099 | DAGVKKGPWTPPEEDKLLVDYINEHGHGSWRRLPKLAGLNRCGKSCRLRWNTYLRPDIKRGFRFTDEEDLIVHLHSLGNKWSIIATKLPGRTDNEIKNYWNTLKRKL      |
| Zea mays | GRMZM2G175232_T01 | Zm2R-MYB100 | QPKLKGLWSPEEDEKLYNHIIHGVGCWSTVPKLAGLQRCGKSCRLRWINYLRPDLKRGFSFQEEEDLIVALHEILGNRWSQIASHLPGRTDNEIKNFWNSCLKKKL       |
| Zea mays | GRMZM2G305856_T01 | Zm2R-MYB101 | AAAMRKGWTPPEEDAQLVWFVRLFGERRWDFLAKVSGLRRTGKSCRLRWVNYLHPGLRRGRITADEERLILQLHAQWGSRWSRIARSLPGRTDNEIKNFWRTRARKQK     |
| Zea mays | GRMZM2G343068_T01 | Zm2R-MYB102 | GGGLKKGWPTKAEEDKLLRDHVERNGEGNWNVAVRRETELQRCGKSCRLRWTHNLRPDLKRGPFSTEERTILVLHGLIGKWTIASHLPGRTDNEIKNYWNTVRKRRQ      |
| Zea mays | GRMZM2G423833_T01 | Zm2R-MYB103 | APQLKKGWWSPEEDKRLKDYVEVHGAGNWNKVQKNAMLNRCGKSCRLRWTHNLRPDLKDPDFDAEEEEKIILYIRWGPKWSMMASYLPGRTDNEIKNFWNTRKRRKQ      |
| Zea mays | GRMZM2G701063_T01 | Zm2R-MYB104 | KEGVKRGAWTAKEDDTLAA YVKAHGEKGWREVPQKAGLRRCGKSCRLRWLNLYLRPNIKRGNISYDEEDLIVRLHKLGNRWSLIAGRLPGRTDNEIKNYWNTLGRRA     |
| Zea mays | AC213884.3_FGT002 | Zm2R-MYB105 | CRRRVKGSWTPPEDELLRAITRHGPRNWTVISSEIPGRSGKSCRLRWCNQLSPSVERRAFTPEEDA IIVAAHAQHGNRWATIARMLHGRTDNSVKNHWNSTLLRQR      |
| Zea mays | GRMZM2G000818_T01 | Zm2R-MYB106 | KAHTNKGAWTKEEDRLVA YIKAHGEWCWRSPLKAAAGLVRGKSCRLRWINYLRPDLKRGNFTEEDELIIKLHSLGNKWSLIAGRLPGRTDNEIKNYWNTHIRKRL       |
| Zea mays | GRMZM2G031323_T01 | Zm2R-MYB107 | KSGLKKGWMPPEEDEKLVA YIKKHGQGNWRTLPKNAGLARCCKGKSCRLRWNTYLRPDIKRGFRFSFDEEETIIQLHSILGNKWSAIAARLPGRTDNEIKNYWNTHIRKRL |
| Zea mays | GRMZM2G045748_T01 | Zm2R-MYB108 | KMGVKKGPWTPPEEDMLVSYVQEHGPGNWRAVPTNTGLMRCCKSCLRWNTYLRPGIKRGNFTEEKEKLVHLQALLGNRWAAIASYLPKRTDNDIKNYWNTLKKKL        |
| Zea mays | GRMZM2G050550_T01 | Zm2R-MYB109 | DVDRIKGPWSPEEDEALQRLVARHGARNWLSIRSIPIGRSGKSCRLRWCNQLSPQVEHRPFTAEEDTILRAHARFGNKWATIARLLSGRTDNAIKNHWNSTLKRKY       |
| Zea mays | GRMZM2G056407_T01 | Zm2R-MYB110 | KEGVKKGPWTPPEEDLVLVSYIQEHGPGNWRAVPARTGLMRCCKSCLRWNTYLRPGIKRGNFTEEKEKLVHLQALLGNRWAAIASYLPERTDNDIKNYWNTLKRKL       |
| Zea mays | GRMZM2G104551_T01 | Zm2R-MYB111 | KLGVKRGWPTAEEDRKLINFILTNHGCCWRAVPKLAGLLRCGKSCRLRWNTYLRPDLKRGLLTDAAEEQVVIDLHAKLGNRWSKIAAKLPGRTDNEIKNHWNTHIKKKL    |
| Zea mays | GRMZM2G117244_T01 | Zm2R-MYB112 | KATVKKGPWPEEDA VLKAYIDEHGAGGNWVQLPHKIGLNRCGKSCRLRWLNLYLRPNIRHGGFTEEEDRLICNLYISIGRWATIAAQLPGRTDNDVKNHWNTLKRRL     |
| Zea mays | GRMZM2G126566_T01 | Zm2R-MYB113 | KVGLKKGWWSAEEDEKLVTFLLTNGQCCWRAVPKLAGLLRCGKSCRLRWNTYLRPDLKRGLLSSEETVIDLHAQLGNRWSKIASHLPGRTDNEIKNHWNTHIKKKL       |
| Zea mays | GRMZM2G150841_T01 | Zm2R-MYB114 | KKKLRRLGLWSPEEDDKLVNHIKYGHCWSSVPKLAGLERCGKSCRLRWINYLRPDLKRGAFSQQEEEDLIIHLHSMGMGNKWSQIASQLPGRTDNEIKNFWNSYVKKKL    |
| Zea mays | GRMZM2G169356_T01 | Zm2R-MYB115 | KVGLKKGWPTAEEDQKLVTFLLINGQCCWRAVPKLAGLLRCGKSCRLRWNTYLRPDLKRGLLSSEETVIDLHAQLGNRWSKIASHLPGRTDNEIKNHWNTHIKKKL       |
| Zea mays | GRMZM2G172327_T01 | Zm2R-MYB116 | KQKVKRGLWSPEEDEKLKDYITAHGHCWWSAVPKHAGLQRCGKSCRLRWINYLRPDLKRGTFSDHEERTIIDVHRILGNRWAIKHLPGRTDNEIKNFWNSCIKKKL       |
| Zea mays | GRMZM2G003406_T01 | Zm2R-MYB117 | QQKLRKGLWSPEEDEKLYNHIIYGVGCWSSVPKLAGLQRCGKSCRLRWINYLRPDLKRGFSFQEEEDAIVGLHQILGNRWSQIASHLPGRTDNEIKNFWNSCLKKKL      |
| Zea mays | GRMZM2G006352_T01 | Zm2R-MYB118 | KTSVKRGPWSPEEDLLRSYVQNHGTGGNWIALPHKAGLNRCGKSCRLRWLNLYLRPDIKHHGGYTEQEDRIICSLYNCIGSRWSIIASKLPGRTDNDVKNYWNTHLKKKA   |
| Zea mays | GRMZM2G028054_T01 | Zm2R-MYB119 | GAPLKKGPWTPAEEDAILIDYVKKHGVGNWNAVRKNTPELLRCGKSCRLRWANHLRPNLKEAFTPEEERLIIQLHAKLGNKWSRMAIHLPGRTDNEIKNYWNTKRRKCE    |
| Zea mays | GRMZM2G047600_T01 | Zm2R-MYB120 | AAELRRGPWTPVEEDA VLAGHVAAHGEGRWELACAAGLRRRTGKSCRLRWLNLYLRPGVRRGGFTPREQLLVLDLHSRWGNRWSRIAAHLPGRTDNEIKNYWRTRVQKHA  |
| Zea mays | GRMZM2G051528_T01 | Zm2R-MYB121 | KVGLKKGWTPREDEILARYIEEHGEGSWRSLPKNAGLLRCGKSCRLRWINYLRAGLKRGNITEEEDVIVKLHATLGNRWSLIAGHLPGRTDNEIKNHWNTHLRRRG       |
| Zea mays | GRMZM2G096358_T01 | Zm2R-MYB122 | MVELRRGPWTPLEEDNLLMNYIACHGEGRWNLARCSGLKRTGKSCRLRWLNLYLPDIKRGNTPEEQLLILELHSGWGNRWSRIAQHLPGRTDNEIKNYWRTRVQKQA      |
| Zea mays | GRMZM2G119693_T01 | Zm2R-MYB123 | QPKLKGLWSPEEDERLYGHIIHGVGCWSSVPKLAGLQRCGKSCRLRWINYLRPDLKRGFSFQEEEDLIVALHEILGNRWSQIASHLPGRTDNEIKNLWNSCLKKKL       |
| Zea mays | GRMZM2G151205_T01 | Zm2R-MYB124 | KTRVKRGPWSQEEDAVLRFSVQRFNAGNWIALPQAGLKRCKGKSCRLRWLNLYLRPELRHGGFTDEEDRLISLYGEIGSKWSVMASRLPGRTDNDVKNYWNTHLKKRY     |



|                          |                   |             |                                                                                                                                                                                                                                                                                       |
|--------------------------|-------------------|-------------|---------------------------------------------------------------------------------------------------------------------------------------------------------------------------------------------------------------------------------------------------------------------------------------|
| <i>Zea mays</i>          | GRMZM2G169316_T01 | Zm2R-MYB125 | IEERVRGPWSPEEDAVLSNLVEKFGARNWTIARGIPGRSGKSCRLRWCNQLDPQVKKRPFTEEDRIIMAAHA VHGKWKASIAKLLDGRTDNAIKNHWNSTLRRRY                                                                                                                                                                            |
| <i>Zea mays</i>          | GRMZM2G171781_T01 | Zm2R-MYB126 | KQKLRKGLWSPEEDEKLMNHITKHGHGCWSSVPKLAGLQRCGKSCRLRWNYLRPDLKRGAFQAQDEEDLIELHVLGNRWSQIAAQLPGRTDNEIKNLWNSCIKKKL                                                                                                                                                                            |
| <i>Zea mays</i>          | GRMZM2G312419_T01 | Zm2R-MYB127 | GKLCARGHWRPAEDA KLKELVA QFGPQNWNLIAERLDGRSGKSCRLRWFNQLDPRINRRAFSEEEERLLAAHRA YGNKWALIARLFPGRTDNA VKNHWHVLMARRQ                                                                                                                                                                        |
| <i>Zea mays</i>          | GRMZM2G322490_T01 | Zm2R-MYB128 | MKKKSAWTKEDA VLREQVRLHGPQNSAISGALLGRNPKSCRLRWQHLSPVVD TARPFTPQEDEKIVFYRQYPNKWATIAGFLPGRTDNAIKNRWHSVLGKVY                                                                                                                                                                              |
| <i>Zea mays</i>          | GRMZM2G330475_T01 | Zm2R-MYB129 | ATELRRGPWTVEEDILLVNYIAAHGEGRWNSLARSAGLRR TGKSCRLRWLNLYLRPDVRRGNITVEEQLLILELHSRWGNRWSKIAQHLPGRTDNEIKNYWRTRVQKHA                                                                                                                                                                        |
| <i>Zea mays</i>          | GRMZM2G395672_T01 | Zm2R-MYB130 | IRTLKRGAWTPEEDELARAVAKDGEGRWRTLP RRAGLLRCGKSCRLRWNYLRPDIKRGPIAADEEDLILRHLRLLGNRWSLIAGRLPGRTDNEIKNYWNSHLSKKL                                                                                                                                                                           |
| <i>Zea mays</i>          | GRMZM2G405094_T01 | Zm2R-MYB131 | KAHTNKGAWTKEEDQLRIAYIAHGEGCWRS LPKAAGLLRCGKSCRLRWNYLRPDLKRGNF TDDDDDEVIIKHLHALLGNKWSLIAGQLPGRTDNEIKNYWNTHIKRKL                                                                                                                                                                        |
| <i>Zea mays</i>          | GRMZM2G431156_T01 | Zm2R-MYB132 | KGHTNKGAWTKEEDERLVA YIRSHGEGCWRS LPSAAGLLRCGKSCRLRWNYLRPDLKRGNF TDEDELIIRLHALLGNKWSLIAGQLPGRTDNEIKNYWNTHIKRKL                                                                                                                                                                         |
| <i>Zea mays</i>          | GRMZM2G004090_T01 | Zm2R-MYB133 | APQLKKGPWSPDEDKLLKNYVEAHGEGKWNKVQRNSGLNRCGKSCRLRWNTNHLR PDLKKG SFDN EEDKILK FYLKWGP KWAKIASRLPGRTDNEIKNF WNTRIKKTE                                                                                                                                                                    |
| <i>Zea mays</i>          | GRMZM2G005066_T01 | Zm2R-MYB134 | KEGVKRGAWTSKEDDALAA YVKAHGEKGWREVPQKAGLRRCGKSCRLRWLNLYLRPNIRRGNISYDEEDLMIIRLHRLGNRWSLIAGRLPGRTDNEIKNYWNSLGRRA                                                                                                                                                                         |
| <i>Zea mays</i>          | GRMZM2G022686_T01 | Zm2R-MYB135 | KVGLKRGRWTKEDQILANYIAEHGEGSWRS LPKNAGLLRCGKSCRLRWNYLRADV KRGNISKEEEDV IIKLHATLGNRWSLIASHLPGRTDNEIKNYWNSHLSRQI                                                                                                                                                                         |
| <i>Zea mays</i>          | GRMZM2G044824_T01 | Zm2R-MYB136 | DAGVKKGPWTPEEDKLLVDYINGNGHGSWRRLPKHAGLNRCGKSCRLRWNTNLYLRPDIKGRFTDDEEKLIHLSLGNKWSAIATKLPGRTDNEIKNYWNTHLRKKL                                                                                                                                                                            |
| <i>Zea mays</i>          | GRMZM2G089686_T01 | Zm2R-MYB137 | QQGWRKGPWTALEDRLTEYVQQHGEGCWNSVAKLTGLRRSGKSCRLRWVNYLRPDLKRGKITPDEETVILHLHAMLGNRWSAIARCLPGRTDNEIKNYWRTHFKKAR                                                                                                                                                                           |
| <i>Zea mays</i>          | GRMZM2G098179_T01 | Zm2R-MYB138 | KESVKKGPWTPEEDLVLSYVQEHGPGNWRAVPANTGLLRCSKSCRLRWNTNLYLRPGIRRGGSFDQEDRLVHLQALLGNRWA AIASYLPDRTDNDVKNY WNTHLKKKL                                                                                                                                                                        |
| <i>Zea mays</i>          | GRMZM2G134279_T01 | Zm2R-MYB139 | AGELRRGPWTVEEDLLVNYVA AHGEGRWNSLARSAGLRR TGKSCRLRWLNLYLRPDLRRGNITPQEQLLILELHSRWGNRWSKIAQHLPGRTDNEIKNYWRTRVQKHA                                                                                                                                                                        |
| <i>Zea mays</i>          | GRMZM2G167088_T01 | Zm2R-MYB140 | APQLKKGPWSPDEDKLLKNYVEAHGEGKWNKVQRNSGLNRCGKSCRLRWNTNHLR PDLKKG PFDNEEDKILK FYLKWGP KWAKIASRLPGRTDNEIKNF WNTRIKKTE                                                                                                                                                                     |
| <i>Zea mays</i>          | GRMZM2G416652_T01 | Zm2R-MYB141 | APQLKKGPWSPDEDKLLKNYVEAHGEGKWNKVQRNSGLNRCGKSCRLRWNTNHLR PDLKKG PFDNEEDKILK FYLKWGP KWAKIASRLPGRTDNEIKNF WNTRIKKTE                                                                                                                                                                     |
| <i>Zea mays</i>          | GRMZM5G803308_T01 | Zm2R-MYB142 | DCDRIRGPWSPEEDDALRRLVERHGARNWTAIGREIPGRSGKSCRLRWCNQLSPQ VERRPFTA EEDA AIVRAHARLGNRWA AIAARLLPGRTDNA VKNHWNSLKRKL                                                                                                                                                                      |
| <i>Zea mays</i>          | AC197146.3_FGT002 | Zm2R-MYB143 | KAGVKKGPWTPEEDIVLSYVQEHGPGNWRAVPVSTGLMRCSSKSCRLRWNTNLYLRPGIRRGNFTPHEEGIIVHLQALLGNRWA AIASYLPQRTDNDIKNY WNTHLKKKL                                                                                                                                                                      |
| <i>Zea mays</i>          | AC206901.3_FGT005 | Zm2R-MYB144 | KMGLKRGWTPPEEDKILVAHIQSFHGSNWRALPKQAGLLRCGKSCRLRWNYLRPDIKRGNF SKEEEDA IITLHEQLGNRWSAIAARLPGRTDNEIKNVWHTHLKRL                                                                                                                                                                          |
| <i>Zea mays</i>          | GRMZM2G001824_T01 | Zm2R-MYB145 | ADDLRRGPWTVEEDILLVNYIAAHGEGRWNSLARSAGLKR TGKSCRLRWLNLYLRPNVRRGNITAEQLLILDLSHRWGNRWSKIAQQLPGRTDNEIKNYWRTRVQKHA                                                                                                                                                                         |
| <i>Zea mays</i>          | GRMZM2G052606_T01 | Zm2R-MYB146 | AAKLRKGLWSPEEDERLVA YMLRSGQGSWSDVARNAGLQRCGKSCRLRWNYLRPDLKRGAFSPQEEELIVSLHAILGNRWSQIAARLPGRTDNEIKNF WNSTIKKRL                                                                                                                                                                         |
| <i>Zea mays</i>          | GRMZM2G081557_T01 | Zm2R-MYB147 | DAGVKKGPWTEEDRALVDHIQRHGGHVSSWRNLPKAAGLNRCGKSCRLRWNTNLYLRPDIKRGNF TDEERLIIGLHAQLGNRWSIATHLDGRTDNEIKNYWNTHIRKKL                                                                                                                                                                        |
| <i>Zea mays</i>          | GRMZM2G097636_T01 | Zm2R-MYB148 | KVGLNKGSWTPEEDMRLIAYIQKYGHANWRALPKQAGLLRCGKSCRLRWNYLRPDLKRGNF TAE EEEAIIKHLGLLGNKWSKIASCLPGRTDNEIKNVWNTHLKRRV                                                                                                                                                                         |
| <i>Zea mays</i>          | GRMZM2G097638_T01 | Zm2R-MYB149 | KVGLNKGSWTPEEDMRLIAYIQKYGHANWRALPKQAGLLRCGKSCRLRWNYLRPDLKRGNF TAE EEEAIIKHLGLLGNKWSKIASCLPGRTDNEIKNVWNTHLKRRV                                                                                                                                                                         |
| <i>Zea mays</i>          | GRMZM2G127490_T01 | Zm2R-MYB150 | KQKLRKGLWSPEEDEKLMNHITKHGHGCWSSIPKLAGLQRCGKSCRLRWNYLRPDLKRGAFS QDEEDL IIELHAVLGNRWSQIAAQLPGRTDNEIKNLWNSCIKKKL                                                                                                                                                                         |
| <i>Zea mays</i>          | GRMZM2G150680_T01 | Zm2R-MYB151 | KPTAFKGPWTMEEDSILRDMVMHHGEGRWSLVAQSLPGRIGKQCRERWINHVDPNIKKNDIWT EEEEDIVLIQAHKSFSGHSWSTIAKFLPGWPENAIKNHWNSTKRSLG                                                                                                                                                                       |
| <i>Zea mays</i>          | GRMZM2G172487_T01 | Zm2R-MYB152 | TAAMKKGPMPEEDLVLSYIHEHGPTKWRHVPASTGLMRCSSKSCRLRWNTNLYLRPGIRRGNFTPREERVIVHLHSLGNRWA AIASHLPQRTDNDIKNYWNTHLKKKL                                                                                                                                                                         |
| <i>Zea mays</i>          | GRMZM2G172575_T01 | Zm2R-MYB153 | TTAIIKGPWMP EEDLVLSYIHEHGPSKWRHVAASTGLMRCSSKSCRLRWNTNLYLRPGIRRGHFTAREERVIVHLHSLGNRWA AIASHLPQRTDNDIKNYWNTHLKKKK                                                                                                                                                                       |
| <i>Zea mays</i>          | GRMZM2G173633_T01 | Zm2R-MYB154 | KDSVKRGQWTP EEDNKLLSYITQYGRNWRLPKNAGLQRCGKSCRLRWNTNLYLRPDLKHGEFTDTEEQTHIKLSVYGNRWSVIAAQLPGRTDNDVKNHWNTLKKKL                                                                                                                                                                           |
| <i>Zea mays</i>          | GRMZM2G311059_T01 | Zm2R-MYB155 | GQAVRKGHWTAEDA VLLRHVLVHGPRDWSSIRSKGFLPRTGKSCRLRWVNL RPD LKTGCKFSAE EERVVLELQAQFGNKWARISTYLPGRTDNDVKNFWSTRQKRIA                                                                                                                                                                       |
| <i>Zea mays</i>          | GRMZM2G325907_T01 | Zm2R-MYB156 | QQKVKRGLWSPEEDEKLIRYITTHGYGCWSEVPEKAGLQRCGKSCRLRWNYLRPDIRRGRFTA EEEKLIISLHAIVGNRWAHIASHLPGRTDNEIKNYWNSWIKKI                                                                                                                                                                           |
| <i>Zea mays</i>          | GRMZM2G425427_T01 | Zm2R-MYB157 | AADLRRGPWTA EEDILLVNYIAAHGEGRWNSLALSAGLKR TGKSCRLRWLNLYLRPNVRRGNITAE EQLLILDLSHRWGNRWSKIAQHLPGRTDNEIKNYWRTRVQKHA                                                                                                                                                                      |
| <i>Zea mays</i>          | AC203535.4_FGT001 | Zm2R-MYB158 | MRIMIKGGVWKNTEDEILKAAVMKYGKNQWARISSLLVRKSAKQCKARWYEWLDP SIKKTEW TREETDEKLLHLAKLMPTQWRTIPIVGRTPSQCLERYEKLLDAAC<br>PIRRTKGGWTLKEDETLRKA VEAFAKGRNWKIAEFFQDRTEVQCLHRWQKVLNPELIKGPWTQE EDEKIIDLVRKYGPTKWSIAKSLPGRIGKQCRERWHNHLNPEIRKDAWTP<br>EEERALIDAHQVFGNKWAEIAKVLPGRTDNSIKNHWNSSLKKKL |
| <i>Zea mays</i>          | GRMZM2G081919_T01 | Zm3R-MYB1   | EEERALIDAHQVFGNKWAEIAKVLPGRTDNSIKNHWNSSLKKKL                                                                                                                                                                                                                                          |
| <i>Oryza sativa v7.0</i> | LOC_Os01g03720.1  | Os2R-MYB001 | MMELRRGPWTEEDNLLMNYIACHGEGRWNLARCSGLKRTGKSCRLRWLNLYLRPDIKRGNTPEEQLLILELHSRWGNRWSRIAQHLPGRTDNEIKNYWRTRVQKQA                                                                                                                                                                            |
| <i>Oryza sativa v7.0</i> | LOC_Os01g07450.1  | Os2R-MYB002 | KKKLRKGLWSPEEDERLATHIARFVSCWSSVPDLAGLQRCGKSCRLRWNYLRPDLKRGFRSHHEEELILALHDKLGNWSQIAARLPGRSDNEIKNFWRARLKKL                                                                                                                                                                              |
| <i>Oryza sativa v7.0</i> | LOC_Os01g09590.1  | Os2R-MYB003 | REAVKRGWSP EEDDALRDYINRHGTAGNWISLPNKAGLRRCGKSCRLRWLNLYLRPDIRHGAFTDEEDAITSLSYKLGSKWSTIAAQLERRTDNDVKNHWNTLKRRL                                                                                                                                                                          |
| <i>Oryza sativa v7.0</i> | LOC_Os01g16810.1  | Os2R-MYB004 | GKLCARGHWRPAEDA KLKDLVA QYGPQNWNLIAEKLDGRSGKSCRLRWFNQLDPRINRRAFTEEEERLMAAHRA YGNKWALIARLFPGRTDNA VKNHWHVLMARRH                                                                                                                                                                        |
| <i>Oryza sativa v7.0</i> | LOC_Os01g18240.1  | Os2R-MYB005 | KQKLRKGLWSPEEDEKLMNHITKHGHGCWSTVPKLAGLQRCGKSCRLRWNYLRPDLKRGAFS QEEEDLIVELHAVLGNRWSQIATRLPGRTDNEIKNLWNSCIKKKL                                                                                                                                                                          |
| <i>Oryza sativa v7.0</i> | LOC_Os01g19330.1  | Os2R-MYB006 | EEDVRRGPWTVEEDAVLAGYVAANGEGRWNELARAAGLRR TGKSCRLRWLNLYLRPDVRRGDFTPQEQLLILELHFRWGNRWSRIAQHMPGRTDNEIKNYWRTRVQKHA                                                                                                                                                                        |
| <i>Oryza sativa v7.0</i> | LOC_Os01g19970.1  | Os2R-MYB007 | KVGLRRGRWTK EDEKLAR YIRENGEGAWRSMPKNAGLLRCGKSCRLRWNYLRADL KRGNISQ EEDIILNLHATLGNRWSLIAGHLPGRTDNEIKNYWNSHLSRKG                                                                                                                                                                         |
| <i>Oryza sativa v7.0</i> | LOC_Os01g36460.1  | Os2R-MYB008 | KPKLRRGLWSPEEDEKLFNHISRYGVGCWSSVPKLAGLERCGKSCRLRWNYLRPDLKRGFSQEEELIISLHKILGNRWSQIAAQLPGRTDNEIKNF WNSCLKKKL                                                                                                                                                                            |
| <i>Oryza sativa v7.0</i> | LOC_Os01g45090.1  | Os2R-MYB009 | EPAVRKGPWTEEDLILVSYISQNGEGSWDNLARSAGLNRNGKSCRLRWLNLYLRPGVRRGSITPEEDMVIRELHSRWGNRWSKIAKHLPGRTDNEIKNYWRTKIHRKP                                                                                                                                                                          |

|                          |                  |             |                                                                                                                    |
|--------------------------|------------------|-------------|--------------------------------------------------------------------------------------------------------------------|
| <i>Oryza sativa</i> v7.0 | LOC_Os01g49160.1 | Os2R-MYB010 | KASVVRGKGPWSPEEDELRLSYVRSHTGTGGNWIALPQKAGLNRGKSCSRLRWLNLYLRPDIKHGGYTDQEDRIICSLYNSIGSRWSIIASKLPGRTDNDVKNYWNTKLLKKA  |
| <i>Oryza sativa</i> v7.0 | LOC_Os01g50110.1 | Os2R-MYB011 | AAALKRGPWTPPEEDEVLFARFVAREGCDRWRTLPRRAGLLRCGKSCSRLRWLNLYLRPDIKRCPIADDEEDLILRLHRLGNGRWSLIAGRLPGRTDNEIKNYWNSHLSKLL   |
| <i>Oryza sativa</i> v7.0 | LOC_Os01g50720.1 | Os2R-MYB012 | QQKLRKGLWSPEEDELKYNHIYRYGVGCWSSVPKLAGLQRCGKSCSRLRWLNLYLRPDLKRGFSFSQEEEDAIVGLHEILGNRWSQIASHLPGRTDNEIKNFWSCLKLL      |
| <i>Oryza sativa</i> v7.0 | LOC_Os01g51260.1 | Os2R-MYB013 | KQKVRRLGWSPEEDELKVKYISTHGHGCWSSVPRLAGLQRCGKSCSRLRWLNLYLRPDLKRGFSFSQEEESLIELHRVGLGNRWAQIAKHLPGRTDNEVKNFWSSTIKKLL    |
| <i>Oryza sativa</i> v7.0 | LOC_Os01g52410.1 | Os2R-MYB014 | KASVVRGKGPWSEEDAILRSFVERFGNAGNWIALPHKAGLKRKCGKSCSRLRWLNLYLRPAIRHGFTDEEDNLILSLYGEEMGSKWSVIASKLPGRTDNDVKNYWNTKLLKRY  |
| <i>Oryza sativa</i> v7.0 | LOC_Os01g59660.1 | Os2R-MYB015 | GPPLKKGWTSAAEDAILVDYVKKHGEGNWNAVQKNTGLFRGKSCSRLRWANHLRPNLKKGAFTAEEERLIQLHSGMGNKWARMAAHLPGRTDNEIKNYWNTRIKRCQ        |
| <i>Oryza sativa</i> v7.0 | LOC_Os01g63160.1 | Os2R-MYB016 | MEERVKGPWSSDEEDTLLSNLVEKLGPRNWTLIARGIPGRSGKSCSRLRWCNQLDPQVQRKPFTEEDRIIMAAHAIHGKWAIAIKLLVGRTDNAIKHNWNTLRRRH         |
| <i>Oryza sativa</i> v7.0 | LOC_Os01g63680.1 | Os2R-MYB017 | NPGSFKGAWTRQEDEVKQMVILHGDRAWATIAKSLPGRIGKQCRERWTHLHPDIKDVWTEEDDRMLIEAHKTYGNRWSVIARCLPGRSENAVKNHWNATKRSLK           |
| <i>Oryza sativa</i> v7.0 | LOC_Os01g65370.1 | Os2R-MYB018 | KAHTNKGAWTKEEDQLIAIYKHAHGEWCWRSPLKAAAGLLRCGKSCSRLRWLNLYLRPDLKRGNFDTDDDELIIKLHALLGNKWSLIAGQLPGRTDNEIKNYWNTHIKRL     |
| <i>Oryza sativa</i> v7.0 | LOC_Os01g74410.1 | Os2R-MYB019 | GGIMRKGWTEQEDVQLVWFVRLGERRWDFLAKVSGLRQSGKSCSRLRWVNYLHPGLKRGMSPEEERMVQVHLAKLGNRWSRIAKSIPGRTDNEIKNYWRTHLRLK          |
| <i>Oryza sativa</i> v7.0 | LOC_Os01g74590.1 | Os2R-MYB020 | SKTRKKGSWRAEEDALLTRLVAQHGHPRWSIISGAIPGRSGKSCSRLRWCNQLSPAQVQHRPFTQEDALLAAAHARHGKAWATIARLLPGRTDNSVKNHWNSTLRRCL       |
| <i>Oryza sativa</i> v7.0 | LOC_Os02g02370.1 | Os2R-MYB021 | KMNYRKGWSPEEDQLRDLVYVHGLGCWSAVPAKAGLQRNGKSCSRLRWLNLYLRPGLKRGMSFQEEEDIVINLQAKLGNKWSQIAMHLPGRTDNEVKNYWNSTLKRK        |
| <i>Oryza sativa</i> v7.0 | LOC_Os02g09480.1 | Os2R-MYB022 | ECDRIKGPWSPEEEDARRLVERHGARNWTAIGRIPGRSGKSCSRLRWCNQLSPQVERRPFTAEEEDAAILRAHARLGNRWAAIARLLPGRTDNAVKHNWNTSLKRL         |
| <i>Oryza sativa</i> v7.0 | LOC_Os02g36890.1 | Os2R-MYB023 | EAGLKKGPWTPPEEDQKLLAYIEQHGHGCWRSPLTKAGLRRCGKSCSRLRWVNYLRPDIKRGKFTLQEEQTIQLHALLGNRWSAIATHLPKRTDNEIKNYWNTHLKRL       |
| <i>Oryza sativa</i> v7.0 | LOC_Os02g40530.1 | Os2R-MYB024 | EGGWRKGPWTAQEDKLLVEYVRQHGEGRWNSVAKITGLKRSKSCSRLRWVNYLRPDLKRGKITPQEEESVILELHALWGNRWSVIARSLPGRTDNEIKNYWRTHFKK        |
| <i>Oryza sativa</i> v7.0 | LOC_Os02g41510.1 | Os2R-MYB025 | KMGLKRGWTAEDRILVAHIERHGHSNWRALPRQAGLLRCGKSCSRLRWLNLYLRPDIKRGNFTRREEEDAIHLDLHLLGNRWSAIAARLLPGRTDNEIKNVWNTHLKRL      |
| <i>Oryza sativa</i> v7.0 | LOC_Os02g42850.2 | Os2R-MYB026 | RPNYRKGWSPEEDQKLDYILRHGHGCWSALPANAGLQRNGKSCSRLRWLNLYLRPGLKHGVSFPEEETVMSLHAALGNKWSRIARHLPGRTDNEVKNYWNSTLKR          |
| <i>Oryza sativa</i> v7.0 | LOC_Os02g42870.1 | Os2R-MYB027 | KKGLKGPWTPPEEDKLLVDYIQANGHGSWRLPLKLAGLNRGKSCSRLRWVNYLRPDIKRGPFTEAEQKSIQVQLHGVGNKWSMIAAQLPGRTDNEIKNYWNTHLKRL        |
| <i>Oryza sativa</i> v7.0 | LOC_Os02g46780.1 | Os2R-MYB028 | KVGLNRGWSWTPQEDMRLIAIYKQKHGHANWRALPKQAGLRCGKSCSRLRWLNLYLRPDLKRGNFTEAEEDTIKHLGLLGNKWSKIASCLPGRTDNEIKNVWNTHLKRL      |
| <i>Oryza sativa</i> v7.0 | LOC_Os02g49986.1 | Os2R-MYB029 | KVGLKGPWTADEQKLVTFLLSNHGCCWRLVPLKLAGLRCGKSCSRLRWVNYLRPDLKRGSLSEEEKVIDLHEQLGNRWSKIAARLPGRTDNEIKHNWNTHIKRL           |
| <i>Oryza sativa</i> v7.0 | LOC_Os02g51799.1 | Os2R-MYB030 | ENGLKGPWTEEEDKLEMEYIQKNGHGSWRALPKLAGLNRGKSCSRLRWVNYLRPDIKRGKFTSAEKDTILQLHVLGNKWSAIAKHLPGRTDNEIKNYWNTHLKDL          |
| <i>Oryza sativa</i> v7.0 | LOC_Os02g54520.1 | Os2R-MYB031 | KASVKKGPWSPEEADAKLKAIEENGTTGGNWIALPQKIGLKRKCGKSCSRLRWLNLYLRPNIKHGDFTTEEEHICSLYISIGSRWSIIAQLPGRTDNDIKNYWNTKLLK      |
| <i>Oryza sativa</i> v7.0 | LOC_Os03g04900.1 | Os2R-MYB032 | QQGWRKGPWTALEDRLLETVYVQHGEGSWNSVAKLTGLRRSGKSCSRLRWVNYLRPDLKRGKITPDEETVILQLHAMLGNRWSAIAARLPGRTDNEIKNYWRTHFKK        |
| <i>Oryza sativa</i> v7.0 | LOC_Os03g13310.1 | Os2R-MYB033 | QEAGKKGWSKEEDKLLRELVRKQGGKDWGIATFPGRDTSKSLRWRQHLDPSVDVALPFSAGEDRKIVELHRVHGNRWATIAAFLPGRSDNAIKNRWNTLKRKH            |
| <i>Oryza sativa</i> v7.0 | LOC_Os03g18480.1 | Os2R-MYB034 | KANVKKGPWTAEDAKLLAYTSTHGTGNWTSVPQAGLKRKCGKSCSRLRYTNYLRPNLKHENFTQEEELIVTLHAMLGSRWSLIANQLPGRTDNDVKNYWNTKLSKLL        |
| <i>Oryza sativa</i> v7.0 | LOC_Os03g19120.1 | Os2R-MYB035 | KVGLKRGRWTEEEDKLAGYIAKHGEGSWRSPLKNAAGLLRCGKSCSRLRWVNYLRAGVVRKGNISQEEEDVIKHLHATLGNRWSYVVKRMDYVCLGARDYCFQNTVRSI      |
| <i>Oryza sativa</i> v7.0 | LOC_Os03g20090.1 | Os2R-MYB036 | GGDLRRGPWTEEDLLLVNYIAAHGEGRWNSLARSAGLKRKSCSRLRWLNLYLRPDLRRGNITPQEQLLILELHRSRWGNRWSKIAQHLPGRTDNEIKNYWRTRVQKHA       |
| <i>Oryza sativa</i> v7.0 | LOC_Os03g25550.1 | Os2R-MYB037 | KKLRRGLWSPEEDELKMNHIAKYGHGCWSSVPKLAGLERCGKSCSRLRWVNYLRPDLKRGFTFSQEEEDLIIQLHSMGLGNKYVLYSSSTHICQSLRSVPSLTMAAATALARWS |
| <i>Oryza sativa</i> v7.0 | LOC_Os03g26130.1 | Os2R-MYB038 | KEGVKKGPWTPPEEDMVLASYVQEHGPGNWRAVPPRTGLLRCSKSCSRLRWVNYLRPGIRRGFSHHEERLILHLQALLGNRWSAIAASYLPHRTDNDVKNFNTLKRK        |
| <i>Oryza sativa</i> v7.0 | LOC_Os03g27090.1 | Os2R-MYB039 | ESSVKKGPWTEEEDKLVAVYVDQHGEGSWRSPLKRAGLNRCCSKSRLRWVNYLRPDIKRGNFTEPEEQAIITLHSLVGNKWSVIATRLPGRTDNEIKNYWNTLKRRL        |
| <i>Oryza sativa</i> v7.0 | LOC_Os03g29614.1 | Os2R-MYB040 | KEGLNRGAWTAMEDDILVSYIAKHGEGKVGALPKRAGLKRKCGKSCSRLRWLNLYLRPGIKRGNISGDEEELILRLHTLLGNRWSLIAGRLPGRTDNEIKNYWNTSLSKRV    |
| <i>Oryza sativa</i> v7.0 | LOC_Os03g38210.1 | Os2R-MYB041 | PVVLKGPWTTAEDAVLVQHVQRHGEGNWNAVQRMTGLLRGKSCSRLRWVNYLRPNLKKGFSFDEELLIAQLHAQLGNKWARMAHLPGRTDNEIKNYWNTLKRRL           |
| <i>Oryza sativa</i> v7.0 | LOC_Os03g51110.1 | Os2R-MYB042 | MCTRGHWRPSEDEKLELVARYGPHNWNIAEKLQGRSGKSCSRLRWVNYLRPDRINRSPFTEEEELLLASHRAHGNRWAVIARLPGRTDNAVKHNWNTLRRRH             |
| <i>Oryza sativa</i> v7.0 | LOC_Os03g56090.1 | Os2R-MYB043 | KASVKKGPWSPEEADAKLKSIEQNGTTGGNWIALPQKIGLKRKCGKSCSRLRWLNLYLRPNIKHGGFSEEDRIILSLYISIGSRWSIIAQLPGRTDNDIKNYWNTLKRRL     |
| <i>Oryza sativa</i> v7.0 | LOC_Os04g28090.1 | Os2R-MYB044 | RIMIKGGVWKNTEDEILKAAVMKYGKNQWARISLLVRKSAKQCKARWYEWLDPISIKTEWTEEEDKLLHLAKLMPTQWRTIAPVGRTPSQCCLERYEKLLDAAC           |
| <i>Oryza sativa</i> v7.0 | LOC_Os04g38740.1 | Os2R-MYB045 | KEGLKGPWTPPEEDQKLLAYIEQHGHGCWRSPLKAGLQRCGKSCSRLRWVNYLRPDIKRGKFTLQEEQTIQLHALLGNRWSAIAATHLPKRTDNEIKNYWNTHLKRL        |
| <i>Oryza sativa</i> v7.0 | LOC_Os04g39470.1 | Os2R-MYB046 | KDNVKGQWTPPEEDNLLSYITQYGTNRWRLPKNAGLQRCGKSCSRLRWVNYLRPDLKHGFTDAEEQTIKHLHSHVGNRWSVIAAQLPGRTDNDVKHNWNTLKRRL          |
| <i>Oryza sativa</i> v7.0 | LOC_Os04g42950.1 | Os2R-MYB047 | GGGWRKGPWTSQEDALLVEHVRQHGEGRWNSVSKLTGLKRSKSCSRLRWVNYLRPDLKRGKITPQEEIIVQLHALWGNRWSVIARSLPGRTDNEIKNYWRTHFKK          |
| <i>Oryza sativa</i> v7.0 | LOC_Os04g43680.1 | Os2R-MYB048 | KMGLKGPWTPPEEDKLVVAHIQRHGHGNWRALPKQAGLLRCGKSCSRLRWVNYLRPDIKRGNFSEEEEDTIIHHELLGNRWSAIAARLPGRTDNEIKNVWNTLKRRL        |
| <i>Oryza sativa</i> v7.0 | LOC_Os04g45020.1 | Os2R-MYB049 | KVHYRKGWSPEEDQKLRDFILRYGHGCWSAVPVKAGLQRNGKSCSRLRWVNYLRPGLKHGMSFSEEEETVMNLHATMGKWSQIARHLPGRTDNEVKNYWNSTLKR          |
| <i>Oryza sativa</i> v7.0 | LOC_Os04g45060.1 | Os2R-MYB050 | SKVLKGPWTPDEEDKLLVDYVQANGSGNWRLLPKLAGLNRGKSCSRLRWVNYLRPDIKRGPFTEPEEKHSILQLHAIVGNKWSMIAAQLPGRTDNEIKNYWNTLKRRL       |
| <i>Oryza sativa</i> v7.0 | LOC_Os04g46384.1 | Os2R-MYB051 | GEALRKGPMMAEDEVLLHVRTHGPMWSSIRSKGLLPRGTGKSCSRLRWVNYLRPNLKSCKFTAEERVVIELQAQFGNKWARIATYLGRTDNDVKNFWSTRQKRLA          |
| <i>Oryza sativa</i> v7.0 | LOC_Os04g50680.1 | Os2R-MYB052 | DAGVKKGPWTEEDRALVEHIKKQGGHVSWSRGLPRAAGLNRGKSCSRLRWVNYLRPDIRGNFSDDEERLIIRLHAALGNKWSVIATHLDRTDNEIKNYWNTLKRRL         |
| <i>Oryza sativa</i> v7.0 | LOC_Os04g50770.1 | Os2R-MYB053 | KVGLNKGWSWTPPEEDMRLVAIYQYGHANWRALPKQAGLLRCGKSCSRLRWVNYLRPDLKRGNFTEEEETIIKHLGLLGNKWSKIASCLPGRTDNEIKNVWNTLKRRL       |

|                          |                  |             |                                                                                                                  |
|--------------------------|------------------|-------------|------------------------------------------------------------------------------------------------------------------|
| <i>Oryza sativa</i> v7.0 | LOC_Os05g04210.1 | Os2R-MYB054 | EGDLRRGPWTVEEDMLLVDIYANHGEGRWNSLARCAGLRRTGKSCRLRWLNLYLRPDVRRGNITADEQLLILDLSRWGNRWSKIAQYLPGRTDNEIKNYWRTRVQKHA     |
| <i>Oryza sativa</i> v7.0 | LOC_Os05g04820.1 | Os2R-MYB055 | KQKLRKGLWSPEEDEKLMNHITKHGHGCWSSVPKLAGLRQCGKSCRLRWYNLYRPDLKRGAFSQQEEDLIIELHAVLGNRWSQIAAQLPGRTDNEIKNLWNSCIKKKL     |
| <i>Oryza sativa</i> v7.0 | LOC_Os05g28320.1 | Os2R-MYB056 | AGGKIKGSWSPEEDEQLRGAVARHGPRNWTASEEVPGRSGKSCRLRWCNQLSPGVHRRPFTPEDELIVAHAHAKYGNKWATIARLLDGRTDNSVKNHWNSSLRRNR       |
| <i>Oryza sativa</i> v7.0 | LOC_Os05g35500.1 | Os2R-MYB057 | KAHTNKGAWTKEEDQLRIAYIRAHGEGCWRSPLKAAAGLLRCGKSCRLRWMNLYRPDLKRGNFDTDEDELIIRLHSLLGKNSLIAGQLPGRTDNEIKNYWNTHIKRKL     |
| <i>Oryza sativa</i> v7.0 | LOC_Os05g41166.1 | Os2R-MYB058 | LKKGPWTSWEDSILEKYIKKHGERNWKL VQKNTGLLRCGKSCRLRWNLHLPNLKKGAFSKEEENKIINLHRKMGKNSRMAADLPGRTDNEIKNYWNTRIKKCK         |
| <i>Oryza sativa</i> v7.0 | LOC_Os05g46610.1 | Os2R-MYB059 | QAKLRKGLWSPEEDDKLYNHIIRHGVCWSSVPKLAGLRQCGKSCRLRWYNLYRPDLKRGFSFQEEEDLIVALHEILGNRWSQIASHLPGRTDNEIKNFWNSCLKKKL      |
| <i>Oryza sativa</i> v7.0 | LOC_Os05g48010.1 | Os2R-MYB060 | KASVVRGPWSPEEDEQLRSYVQSHGIGGNWIALPQKAGLNRCGKSCRLRWLNLYLRPDIKHGGYTEQEDHIICSLYNSIGSRWSIIASKLPGRTDNDVKNYWNTRKLLKKA  |
| <i>Oryza sativa</i> v7.0 | LOC_Os05g49310.1 | Os2R-MYB061 | EAAVRKGPWTMEEDLSLVNYIAANGEGAWNTLARAAGLNRTGKSCRLRWLNLYLRPDVRRGNITPEEHTLIVELQARWGNRWSKIARYLPGRTDNEVKNFWRTKIQKKH    |
| <i>Oryza sativa</i> v7.0 | LOC_Os06g02250.1 | Os2R-MYB062 | DADVKKGPWTPEEDKLLVEYIGKNGHGSWRRLPKLAGLNRCGKSCRLRWYNLYLRPDIKRGGFSDEERLIIHLHATLGNKWSIATKLGKRTDNEIKNYWNTHLRKKL      |
| <i>Oryza sativa</i> v7.0 | LOC_Os06g06740.1 | Os2R-MYB063 | KANVVKGWTLLEEDRKLVLVEQFGLRKRWSHIAQILPGRVKGQCRERWNNHLPNPKKDTWSEEDIVLIQTHKEVGNKWAEIAKHLPGRTENSIGNHWNTATKRRQF       |
| <i>Oryza sativa</i> v7.0 | LOC_Os06g10350.1 | Os2R-MYB064 | KEGMRKGAWTSKEDDVLASYIKSHGEGKWREVPQAGLRRCGKSCRLRWLNLYLRPNIKRGNIDDEELIVRLHLLGNRWSLIAGRLPGRTDNEIKNYWNTLSRRI         |
| <i>Oryza sativa</i> v7.0 | LOC_Os06g11780.1 | Os2R-MYB065 | ENGLKKGWTPPEDEKLMYSIQKHGHASWRVLPPELAGLNRCGKSCRLRWNTNLYKPDIKRGNFSREEEQITLQLHSILGNKWSAIAKHLPGRTDNEIKNFWNTHLRKKL    |
| <i>Oryza sativa</i> v7.0 | LOC_Os06g14670.1 | Os2R-MYB066 | KVGLKKGWTAEEEDQLVAFLLTHGHCCWRVVPKLAGLLRCGKSCRLRWNTNLYRPDLKRGLLSDDEERLVIDLHAQLGNRWSKIAARLPGRTDNEIKNHWNTHIKKKL     |
| <i>Oryza sativa</i> v7.0 | LOC_Os06g40330.1 | Os2R-MYB067 | RIPLKKGWTPDEDKRLREYVEAHGEGNWRVQRNAGLNRCGKSCRLRWANHLKPDLLKGGPFSKEEEMIIKHLHLWLGKWKAMANSPLPGRTDNEIKNFWNTCKRIQ       |
| <i>Oryza sativa</i> v7.0 | LOC_Os06g43090.1 | Os2R-MYB068 | DCDRIRGPWSPEEDEALRRLVERHGARNWTAIGREIPGRSGKSCRLRWCNQLSPQVERRPFTAEDATILRAHARLGNRWAAIARLLQGRTDNAVKNHWNSLKRKL        |
| <i>Oryza sativa</i> v7.0 | LOC_Os06g46560.1 | Os2R-MYB069 | GGGLKKGWTAQEDKLLVDHVRHGEENWNAVRRETGLQRCGKSCRLRWANHLRPDLKRGPFSPDEERLILRLHGLLGNKWARISSYLHGRTDNEIKNYWNTLRKRRV       |
| <i>Oryza sativa</i> v7.0 | LOC_Os07g12130.1 | Os2R-MYB070 | NPGLVKGWTRTEEDVLRQMVRHHGDRKWAEIAKSLPGRVKGQCRERWNTNHLHPDIKDIWTEEDRMLIEAHQTYGNSWSAIAKQLPGRSENTIKNHWNATKRSLN        |
| <i>Oryza sativa</i> v7.0 | LOC_Os07g14110.1 | Os2R-MYB071 | NSGLIKGGWTRTEEDVLRQMVRHHGDRKWAEIAKSLPGRIGKQCRERWNTNHLHPDIKGIWTEEDRKLKAHQTYGNRWSAIARSLPGRSENTVKNRWNTATKRSLN       |
| <i>Oryza sativa</i> v7.0 | LOC_Os07g31470.1 | Os2R-MYB072 | KQKVRKGLWSPEEDEKLVRYISEHGHSCWSSVPKHAGLRQCGKSCRLRWYNLYRPDLKRGTFSEQEERTIIDVHRILGNRWAQIAKHLPGRTDNEVKNFWNSCIKKKL     |
| <i>Oryza sativa</i> v7.0 | LOC_Os07g37210.1 | Os2R-MYB073 | KSGLKKGWTPPEDEKLIAYIKHGGQGNWRTLPKNAGLSRCGKSCRLRWNTNLYRPDIKRGFRSFEIEEAIQLHSILGNKWSAIAARLPGRTDNEIKNYWNTHIRKRL      |
| <i>Oryza sativa</i> v7.0 | LOC_Os07g43420.1 | Os2R-MYB074 | KKDRHIVSWSTEEDVLRQIALHGTDNWTIIAAQFKDKTARQRRRWYNLYNSECKGGWSREEDLLCEAQKVLGNKWTEIAKVVSGRTDNAVKNRSTLCKRRA            |
| <i>Oryza sativa</i> v7.0 | LOC_Os07g43580.1 | Os2R-MYB075 | KDGVKKGWTPPEEDLVLSYVQEHGPGNWRAVPTRTGLMRCCKSCRLRWNTNLYRPGIKRGNFTDQEEKLIVHLQALLGNRWAAIASYLPERTDNDIKNYWNTHLKRRL     |
| <i>Oryza sativa</i> v7.0 | LOC_Os07g44090.3 | Os2R-MYB076 | RKKLRRGLWSPEEDEKLMNHIKYGHCWSSVPKLAGLRCGKSCRLRWYNLYRPDLKRGAFSQQEEDLIIHLHSLGNKWSQIAAQLPGRTDNEVKNFWNSYIKKKL         |
| <i>Oryza sativa</i> v7.0 | LOC_Os07g48870.1 | Os2R-MYB077 | GDELRRGPWTVEEDLLVNYIAAHGEGRWNALARCAGLRKRTGKSCRLRWLNLYLRPDVRRGNMTAEQLLILELHGRWGNRWSKIAQHLPGRTDNEIKNYWRTRVQKHA     |
| <i>Oryza sativa</i> v7.0 | LOC_Os08g05520.1 | Os2R-MYB078 | QQKVRKGLWSPEEDEKLIRYITTHGYGCWSEVPEKAGLRQCGKSCRLRWYNLYLRPDVRRGRFTAEKELIISLHAIVGNRWAHIASHLPGRTDNEIKNYWNSWIKKKI     |
| <i>Oryza sativa</i> v7.0 | LOC_Os08g15020.1 | Os2R-MYB079 | KATVKKGPWSPEEDAMLKNIIEHGTGGNWIAPHKIGLKRCGKSCRLRWLNLYLRPNIKHGDFTPEEDSIIICSLYISIGSRWSIAAQLPGRTDNDVKNYWNTRKLLKRL    |
| <i>Oryza sativa</i> v7.0 | LOC_Os08g33150.1 | Os2R-MYB080 | KVGLKKGWTAEEEDQLITFLLTNGQCCWRAVPKLAGLLRCGKSCRLRWNTNLYRPDLKRGLLSDAEEKIVVDLHAQLGNRWSKIASHLPGRTDNEIKNHWNTHIKKKL     |
| <i>Oryza sativa</i> v7.0 | LOC_Os08g33660.1 | Os2R-MYB081 | KIGLKKGWTPPEEDQLLAIYIEEHGHGSWRALPSKAGLRQCGKSCRLRWNTNLYRPDIKRGKFSLQEEQTIQLHALLGNRWSAIAATHLPKRTDNEIKNYWNTHLKRRL    |
| <i>Oryza sativa</i> v7.0 | LOC_Os08g33800.1 | Os2R-MYB082 | SRLAARGHWRPAEDAKRELVALYGPQNWNIADKLDGRSGKSCRLRWQNLDPRIKRPFSDEEERLMAAHRFYGNKWAMIARLFPGRTDNAVKNHWHVIMARKY           |
| <i>Oryza sativa</i> v7.0 | LOC_Os08g33940.1 | Os2R-MYB083 | KAEVKKGWTPPEEDMLVA YVQEHGPGNWRAVPTNTGLMRCCKSCRLRWNTNLYRPGIKRGNFTDQEEKLIVHLQALLGNRWAAIASYLPERTDNDIKNYWNTHLKRRL    |
| <i>Oryza sativa</i> v7.0 | LOC_Os08g34960.1 | Os2R-MYB084 | SGGGRKTPWTQEEDEALRRAVREHRRQNWAEIALALPRRGP <b>KSCRLRWQHLSPELDSRVFTAEDAILAQQR</b> VHGNKWATIARCLPGRYDNAVKNRWNSALRKL |
| <i>Oryza sativa</i> v7.0 | LOC_Os08g37970.1 | Os2R-MYB085 | ESGLKKGWTPPEEDKLLHYIQKNGHGSWRTLPRLAGLNRCGKSCRLRWNTNLYRPDIKRGKFSQEEQTIHLHSLGNKWSAIAATHLPGRTDNEIKNFWNTHLKRRL       |
| <i>Oryza sativa</i> v7.0 | LOC_Os08g43550.1 | Os2R-MYB086 | KEHTNKGAWTKEEDERLVA YIRAHGEGCWRSPLKAAAGLLRCGKSCRLRWYNLYLRPDVRRGNFTADEDDLIIKLSLGNKWSLIAARLPGRTDNEIKNYWNTHIRRKL    |
| <i>Oryza sativa</i> v7.0 | LOC_Os09g01960.1 | Os2R-MYB087 | DVDRIKGPWSPEEDEALQRLVGRHGARNWLSISKIPGRSGKSCRLRWCNQLSPQVEHRPFTPEEDDTILRAHARFGNKWATIARLLAGRTDNAVKNHWNSTLKRKH       |
| <i>Oryza sativa</i> v7.0 | LOC_Os09g23620.1 | Os2R-MYB088 | KVGLKKGWTAEEEDQLVSVLLGNGQCCWRAVPKLAGLLRCGKSCRLRWNTNLYRPDLKRGLLSETTEKTVIDLHEQLGNRWSKIASHLPGRTDNEIKNHWNTHIKKKL     |
| <i>Oryza sativa</i> v7.0 | LOC_Os09g24800.1 | Os2R-MYB089 | KVGKKGWTPPEEDMLVSYIQEHGAGNWRAVPTNTGLMRCCKSCRLRWNTNLYRPGIKRGNFTDQEEKLIVHLQALLGNRWAAIASYLPERTDNDIKNYWNTHLKRRL      |
| <i>Oryza sativa</i> v7.0 | LOC_Os09g26170.1 | Os2R-MYB090 | KATVKKGPWAPEEDAALKA YVDAHGTGGNWIAPHKIGLNRCGKSCRLRWLNLYLRPNIRHGGFTEDEDRLICSLYIAIGSRWATIAAQLPGRTDNDIKNYWNSKLRRL    |
| <i>Oryza sativa</i> v7.0 | LOC_Os09g36250.1 | Os2R-MYB091 | KLGVKGPWTAEEEDKLMFILTNHGCCWRAVPKLAGLLRCGKSCRLRWNTNLYRPDLKRGLLTDAEEQLVIDLHAKLGNRWSKIAAKLPGRTDNEIKNHWNTHIKKKL      |
| <i>Oryza sativa</i> v7.0 | LOC_Os09g36730.1 | Os2R-MYB092 | KAHTNKGAWTKEEDRLIAYIKAHGEGCWRSPLKAAAGLLRCGKSCRLRWYNLYRPDLKRGNFTEEDELIIKLSLGNKWSLIAGRLPGRTDNEIKNYWNTHIRRKL        |
| <i>Oryza sativa</i> v7.0 | LOC_Os10g33810.1 | Os2R-MYB093 | KEGLRRGAWSPPEEDRLVA YIRRHGHPNWRALPKQAGLLRCGKSCRLRWYNLYRPDIKRGNFTEEEDLIVRLHNSLGNRWSAIAAQMGRTDNEIKNVWNTHLKRRL      |
| <i>Oryza sativa</i> v7.0 | LOC_Os10g35660.1 | Os2R-MYB094 | MKKGKWSKEEDDLIKNHMEKYGIGRSWQALSDALGQRGRSRSRWLNLYRPLGKHGDFSPAEEIICKMYSKKSSWSAIAAQLPGRTDNAVKNYWNSTLKKRF            |
| <i>Oryza sativa</i> v7.0 | LOC_Os11g03440.1 | Os2R-MYB095 | KEGKKGWTPPEEDILVSYIQEHGPGNWRSVPINTGLMRCCKSCRLRWNTNLYRPGIKRGNFTAEEGIIVHLQSLGNRWAAIASYLPQRTDNDIKNYWNTHLKRRL        |
| <i>Oryza sativa</i> v7.0 | LOC_Os11g10130.1 | Os2R-MYB096 | SSACPRGHWRPEDEKRLQVKEYGPQNWNSIAEKLEGRSGKSCRLRWQNLDPRIKRPFTTEEEERLLAAHRHHGNKWALIARHFPGRTDNAVKNHWHVVRARRS          |
| <i>Oryza sativa</i> v7.0 | LOC_Os11g35390.1 | Os2R-MYB097 | GVGVKKGWTPPEEDILVSYIQEHGPGNWRSVPENTGLMRCCKSCRLRWNTNLYRPGIKRGNFTPEEGIIHLQALLGNKWAIAIASYLPQRTDNDIKNYWNTHLKRRV      |
| <i>Oryza sativa</i> v7.0 | LOC_Os11g45740.1 | Os2R-MYB098 | SAELRRGPWTVEEDLTLINYSIDHGEGRWNALARAAGLKRTGKSCRLRWLNLYLRPDVRRGNFTAEEQLLILDLSRWGNRWSKIAQHLPGRTDNEIKNYWRTRVQKHA     |

|          |                                |                   |             |                                                                                                                                                                                                                                 |
|----------|--------------------------------|-------------------|-------------|---------------------------------------------------------------------------------------------------------------------------------------------------------------------------------------------------------------------------------|
|          | <i>Oryza sativa</i> v7.0       | LOC_Os11g47460.1  | Os2R-MYB099 | REEMRKGWTEQEDLQLVCTVRLFGDRRWDVFAKVSGLNRTGKSCRLRWVNYLHPGLKHGRMSPKEEHLIELHARWGNRWSRIARRLPGRTDNEIKNYWRTHMRKKA                                                                                                                      |
|          | <i>Oryza sativa</i> v7.0       | LOC_Os12g03150.1  | Os2R-MYB100 | KEGIKKGWTPPEEDIILVSYIQEHGPGNWRVSPINTGLMRCSSKSCRLRWNTYLRPGIKRGNFTAHEEGIIVHLQSLGNGRWAIIASYPQRTDNDIKNYWNTHLKKKL                                                                                                                    |
|          | <i>Oryza sativa</i> v7.0       | LOC_Os12g07610.1  | Os2R-MYB101 | KADAVKGHWTVEEDRKLVKLVEQFGLKKSLSLIGMLPGRVKGQCRERWFNHLRPNIKDWTWSEEDMVLIIHQIHEVGNRWAEIAKCLPGRTESENSIKNHWNATKRRQF                                                                                                                   |
|          | <i>Oryza sativa</i> v7.0       | LOC_Os12g07640.1  | Os2R-MYB102 | KAHTNKGAWTKEEDQRLIAHINQHGEGCWRSPLKAAAGLLRCGKSCRLRWNYLRPDLKRGNFTEDEDELIKHELLGNKWSLIAGRPLPGRTDNEIKNYWNTHIKRL                                                                                                                      |
|          | <i>Oryza sativa</i> v7.0       | LOC_Os12g33070.1  | Os2R-MYB103 | GGKVRKGLWSPEEDEKLVAYMLRSQGGSWSDVARNAGLQRCGKSCRLRWNYLRPDLKRGAFSPQEEEDLVNLHAILGNRWSQIAARLPGRTDNEIKNFVNSTIKKRL                                                                                                                     |
|          | <i>Oryza sativa</i> v7.0       | LOC_Os12g37690.1  | Os2R-MYB104 | QLELRRGPWTVEDEDLTVNVIADHGEGRWNSLARAAGLKRTGKSCRLRWNYLRPDKVGRGNFTADEQLLIDLHRSRNGRWSKIAQHLPGRTDNEIKNYWRTRVQKHA                                                                                                                     |
|          | <i>Oryza sativa</i> v7.0       | LOC_Os12g37970.1  | Os2R-MYB105 | REEIRKGPWTEQEDLQLVCTVRLFGERRWDFIAKVSGLNRTGKSCRLRWVNYLHPGLKGRMSPHEERLILELHARWGNRWSRIARRLPGRTDNEIKNYWRTHMRKKA                                                                                                                     |
|          | <i>Oryza sativa</i> v7.0       | LOC_Os12g38400.2  | Os2R-MYB106 | MRERQRWRPEEDAILLAYVRQYGPRESLVSQRMNRPLHRDAKSLERWKNYLPRGKIKGSLTDDEQRLVIRLQAKHGNKWKKIAAEVPGRTAKRLGKWWVEVFKEKQQ<br>PIIRAKGGWTPPEEDTLRKAVEAYKGRNWKIAECFPYRTEVQCLHRWQVLPNPELIKGPWTQEEDDQIIDLVKKGYPKWSVIAKALPGRIGKQCRERWHNHLNPEIRKDAWT |
|          | <i>Oryza sativa</i> v7.0       | LOC_Os01g62410.1  | Os3R-MYB1   | TEEEQALINAHRIYGNKWAELAKVLPGRTDNSIKNHWNSSLRKKQ<br>PVRRAKGGWTPPEEDEKLRKAVDIYNGKNWKKIEVQCLHRWQKVLDPelikGPWTQEEDDVIINMVKKHGPCKWSVIARSLNGRIGKQCRERWHNHLDPQIRKEAWTVEEERVL                                                             |
|          | <i>Oryza sativa</i> v7.0       | LOC_Os05g38460.1  | Os3R-MYB2   | ARAHCMYGNKWAELAKLLPGRTDNSIKNHWNSSLRKKI                                                                                                                                                                                          |
| Eudicots | <i>Aquilegia coerulea</i> v1.1 | Aquca_034_00352.1 | Ac2R-MYB01  | RIMIKGGVWKNTEDEILKAAVMKYGKNQWARISSLLVRKSAKQCKARWYEWLDPISIKKTEWTREDEKLLHLAKLMPTQWRTIPIVGRTPSQCLERYEKLLDAAC                                                                                                                       |
|          | <i>Aquilegia coerulea</i> v1.1 | Aquca_014_00928.2 | Ac2R-MYB02  | GTVLKKGWTPSTEDAILVDYVKKHGEGNWNAVQKHSGFRGKSCRLRWANHLRPNLKKGAFTAEHEEHKIELHAKMGNKWARMAAHLPGRTDNEIKNYWNTRIKRRQ                                                                                                                      |
|          | <i>Aquilegia coerulea</i> v1.1 | Aquca_002_00543.1 | Ac2R-MYB03  | QKERHIVTWSQEDDILREQISIHGTENWAIIAAQFKDKTTRQCRRWYTYLNSDFKKGGSQEEEDLILCEAQKIYGNRWTEIAKVVSGRTDNAVKNRSTLCKKRA                                                                                                                        |
|          | <i>Aquilegia coerulea</i> v1.1 | Aquca_002_00639.1 | Ac2R-MYB04  | SKLCARGHWRPAEDTKLKVVALYGPQNWNLIAEKLEGRSGKSCRLRWNYLRPDLKRGNFTEDEDELIKHELLGNKWSLIAGRPLPGRTDNSVKNHWHVIMARKY                                                                                                                        |
|          | <i>Aquilegia coerulea</i> v1.1 | Aquca_009_00809.1 | Ac2R-MYB05  | SDDRKVGKSPWPEEDNVLRLVAKFGPRNWSLIARIGPRSGKSCRLRWNYLRPDLKRGAFSPQEEEDLVNLHAILGNRWSQIAARLPGRTDNAIKNHWNSTLRRRR                                                                                                                       |
|          | <i>Aquilegia coerulea</i> v1.1 | Aquca_025_00152.1 | Ac2R-MYB06  | KSNVVRGLWTAEEADAKILAYVSDHGPNGWTSVPKKAGLRRCGKSCRLRWNYLRPDLKRGAFSPQEEEDLVNLHAILGNRWSQIAARLPGRTDNAIKNHWNSTLRRRR                                                                                                                    |
|          | <i>Aquilegia coerulea</i> v1.1 | Aquca_002_00671.1 | Ac2R-MYB07  | MRHGHGSRWALPAKAGLQRCGKSCRLRWNTYLRPDKRKGKFSLQEEQTIQLHALLGNRWSAIATHLPKRTDNEIKNYWNTHLKRL                                                                                                                                           |
|          | <i>Aquilegia coerulea</i> v1.1 | Aquca_028_00141.1 | Ac2R-MYB08  | KVGLNKGLWSAEDEILRNYIEENGEGSWRSLPKNAGLNRCGKSCRLRWNYLRGGLMRGNITSEEDIIKMHNKIGNRWSVIARHLPGRTDNEIKNHWNSTLRRRI                                                                                                                        |
|          | <i>Aquilegia coerulea</i> v1.1 | Aquca_011_00538.1 | Ac2R-MYB09  | KQKLRKGLWSPEEDEKLVNYSIRNGIGCWSSVPKQAGLQRCGKSCRLRWNYLRPDLKRGAFSPQEEEDLVNLHAILGNRWSQIAARLPGRTDNAIKNHWNSTLRRRI                                                                                                                     |
|          | <i>Aquilegia coerulea</i> v1.1 | Aquca_027_00369.1 | Ac2R-MYB10  | MKERQRWRAEEDALLRAYVKYGPREWNLVSQRMNTPLDRDAKSLERWKNYLKPGIKKGSLEEEQRLVIRLQAKHGNKWKKIAAEVPGRTAKRLGKWWVEVFKEKQQ                                                                                                                      |
|          | <i>Aquilegia coerulea</i> v1.1 | Aquca_001_00247.1 | Ac2R-MYB11  | KANVKKGPWSPPEEDAKLKEYIEQHGTGGNWIALPQKIGLRKCGKSCRLRWNYLRPDLKRGAFSPQEEEDLVNLHAILGNRWSQIAARLPGRTDNAIKNHWNSTLRRRI                                                                                                                   |
|          | <i>Aquilegia coerulea</i> v1.1 | Aquca_005_00315.1 | Ac2R-MYB12  | KDNVVRGLWTAEEADAKILAYVSDHGPNGWTSVPKKAGLRRCGKSCRLRWNYLRPDLKRGAFSPQEEEDLVNLHAILGNRWSQIAARLPGRTDNAIKNHWNSTLRRRI                                                                                                                    |
|          | <i>Aquilegia coerulea</i> v1.1 | Aquca_002_00594.1 | Ac2R-MYB13  | KVGKKGWTPPEEDIILVSYIQEHGPGNWRVPTNTGLLRCSKSCRLRWNYLRPDLKRGAFSPQEEEDLVNLHAILGNRWSQIAARLPGRTDNAIKNHWNSTLRRRI                                                                                                                       |
|          | <i>Aquilegia coerulea</i> v1.1 | Aquca_010_00195.1 | Ac2R-MYB14  | ENGLKKGWTPPEEDHKLQYIYQKHGHSWRALPKLAGLNRCGKSCRLRWNYLRPDKRKGKFSLEEEQTIQLHALLGNRWSAIATHLPKRTDNEIKNYWNTHLKRL                                                                                                                        |
|          | <i>Aquilegia coerulea</i> v1.1 | Aquca_030_00066.1 | Ac2R-MYB15  | KANVKKGPWSPPEEDTRLKEYIEKFGTGGNWIALPQKAGLRKCGKSCRLRWNYLRPDLKRGAFSPQEEEDLVNLHAILGNRWSQIAARLPGRTDNAIKNHWNSTLRRRI                                                                                                                   |
|          | <i>Aquilegia coerulea</i> v1.1 | Aquca_003_00440.1 | Ac2R-MYB16  | SLDLRRGPWTVEEDLTLNYSNHGEGRWNSLARCAGLKRTGKSCRLRWNYLRPDKRKGKFSLEEEQTIQLHALLGNRWSAIATHLPKRTDNEIKNYWNTHLKRL                                                                                                                         |
|          | <i>Aquilegia coerulea</i> v1.1 | Aquca_013_00356.1 | Ac2R-MYB17  | KLGLKGPWAPPEDELLTDYIKKNGHGSWRSLPKLAGLLRCGKSCRLRWNYLRPDKRKGKFSLEEEQTIQLHALLGNRWSAIATHLPKRTDNEIKNYWNTHLKRL                                                                                                                        |
|          | <i>Aquilegia coerulea</i> v1.1 | Aquca_009_00496.1 | Ac2R-MYB18  | KEGLKRGWTPPEEDVLSYIRREGGRWTLPRKAGLLRCGKSCRLRWNYLRPDLKRGAFSPQEEEDLVNLHAILGNRWSQIAARLPGRTDNAIKNHWNSTLRRRI                                                                                                                         |
|          | <i>Aquilegia coerulea</i> v1.1 | Aquca_002_00119.1 | Ac2R-MYB19  | KMNAARGQWTEEDRKLKLVKYGDKHWTYIAHKMNGRIGKQCRERWHNHLRPNIKKETWTEDEDNALIKAHKELGNKWAELAKRPLPGRTESENSIKNHWNATKRRQF                                                                                                                     |
|          | <i>Aquilegia coerulea</i> v1.1 | Aquca_013_00661.1 | Ac2R-MYB20  | KLGVKKGWTPPEEDKLVNFILNNGQCCWRAVPKLAGLLRCGKSCRLRWNYLRPDLKRGAFSPQEEEDLVNLHAILGNRWSQIAARLPGRTDNAIKNHWNSTLRRRI                                                                                                                      |
|          | <i>Aquilegia coerulea</i> v1.1 | Aquca_045_00169.1 | Ac2R-MYB21  | GDQRKGSWSPEDARLTKLVEEHGPRNWSVISSGIPGRSGKSCRLRWNYLRPDLKRGAFSPQEEEDLVNLHAILGNRWSQIAARLPGRTDNAIKNHWNSTLRRRI                                                                                                                        |
|          | <i>Aquilegia coerulea</i> v1.1 | Aquca_006_00250.1 | Ac2R-MYB22  | KAHTNKGAWTKEEDRLIAHIRAHGEGCWRSPLKAAAGLLRCGKSCRLRWNYLRPDLKRGAFSPQEEEDLVNLHAILGNRWSQIAARLPGRTDNAIKNHWNSTLRRRI                                                                                                                     |
|          | <i>Aquilegia coerulea</i> v1.1 | Aquca_017_00716.1 | Ac2R-MYB23  | KMGLKRGWTPPEEDQVLIAFIQNYGHGNWRALPKQAGLLRCGKSCRLRWNYLRPDKRGNFNSNEEEETHIKLHEMLGNRWSAIAGRLPGRTDNEIKNYWNTHLKRL                                                                                                                      |
|          | <i>Aquilegia coerulea</i> v1.1 | Aquca_002_01251.1 | Ac2R-MYB24  | MCTRGHWRPSEDEKLRELVEYMGPHNWNIAEKLHGRSGKSCRLRWNYLRPDLKRGAFSPQEEEDLVNLHAILGNRWSQIAARLPGRTDNAIKNHWNSTLRRRI                                                                                                                         |
|          | <i>Aquilegia coerulea</i> v1.1 | Aquca_003_00309.1 | Ac2R-MYB25  | SQGWRKGPWTAEDKLLTEYVTLHGEGRWSTVARSAGLNRRNKSCLRWVNYLRPDLKRGAFSPQEEEDLVNLHAILGNRWSQIAARLPGRTDNAIKNHWNSTLRRRI                                                                                                                      |
|          | <i>Aquilegia coerulea</i> v1.1 | Aquca_022_00293.1 | Ac2R-MYB26  | AKNCCPRGHWRAPEDEKLRQLVEYQGPQNWNSIADKLQGRSGKSCRLRWNYLRPDLKRGAFSPQEEEDLVNLHAILGNRWSQIAARLPGRTDNAIKNHWNSTLRRRI                                                                                                                     |
|          | <i>Aquilegia coerulea</i> v1.1 | Aquca_030_00294.1 | Ac2R-MYB27  | KQKVRKGLWSPEEDEKLVKINTHGHSCWSA VPKLAGLQRCGKSCRLRWNYLRPDLKRGAFSPQEEEDLVNLHAILGNRWSQIAARLPGRTDNAIKNHWNSTLRRRI                                                                                                                     |
|          | <i>Aquilegia coerulea</i> v1.1 | Aquca_030_00385.1 | Ac2R-MYB28  | KIGLKRGPWTPAEDKRLISYVEKNGHANWRALPTQAGLLRCGKSCRLRWNYLRPDKRGNFNSNEEEETHIKLHEMLGNRWSAIAGRLPGRTDNEIKNYWNTHLKRL                                                                                                                      |
|          | <i>Aquilegia coerulea</i> v1.1 | Aquca_073_00013.1 | Ac2R-MYB29  | HSHFNKGAWTEQEDQILINIKLHGEGRWQLPKAAGLLRCGKSCRLRWNYLRPDLKRGAFSPQEEEDLVNLHAILGNRWSQIAARLPGRTDNAIKNHWNSTLRRRI                                                                                                                       |
|          | <i>Aquilegia coerulea</i> v1.1 | Aquca_030_00038.1 | Ac2R-MYB30  | EEIMRKGWLEEEEDERTTYVALMGERRWDSIARVSGLRSGKSCRLRWNYLRPDLKRGAFSPQEEEDLVNLHAILGNRWSQIAARLPGRTDNAIKNHWNSTLRRRI                                                                                                                       |
|          | <i>Aquilegia coerulea</i> v1.1 | Aquca_014_00947.1 | Ac2R-MYB31  | KVGKKGWTPPEEDIILVSYIQEHGPGNWRVPTNTGLLRCSKSCRLRWNYLRPDLKRGAFSPQEEEDLVNLHAILGNRWSQIAARLPGRTDNAIKNHWNSTLRRRI                                                                                                                       |
|          | <i>Aquilegia coerulea</i> v1.1 | Aquca_042_00052.1 | Ac2R-MYB32  | KPIVTRGQWSAAEDQSLVRLVNTYGAKSWSLIAARLGRNGKQCRDRWNHLRPVIKQAWSVEEDKAFIDAHKEIGNRWAEIAKRPGRTEIAIKNRWNLVRRKLL                                                                                                                         |
|          | <i>Aquilegia coerulea</i> v1.1 | Aquca_005_00496.1 | Ac2R-MYB33  | EFGLKKGWTPPEEDMLVDYIKRHGHSWRALPKLAGLNRCGKSCRLRWNYLRPDKRKGKFSLEEEQTIQLHALLGNRWSAIATHLPKRTDNEIKNYWNTHLKRL                                                                                                                         |
|          | <i>Aquilegia coerulea</i> v1.1 | Aquca_003_00583.1 | Ac2R-MYB34  | KVGLKKGWTAPEDEILSKYIDANGEGSWRSLPKNAGLKRCGKSCRLRWNYLRGDLKRGAFSPQEEEDLVNLHAILGNRWSQIAARLPGRTDNAIKNHWNSTLRRRI                                                                                                                      |

|                                |                   |            |                                                                                                                                                |
|--------------------------------|-------------------|------------|------------------------------------------------------------------------------------------------------------------------------------------------|
| <i>Aquilegia coerulea</i> v1.1 | Aquca_025_00059.1 | Ac2R-MYB35 | EEGWRKGPWTAEEEDKLLIEYVNLHGEGRWNSVAMFSGLKRNGKSCRLRWVNYLRPDLKRGKITPNEENIILELHARWGNRWSTIARSLPGRTDNEIKNYWRTHFKKSA                                  |
| <i>Aquilegia coerulea</i> v1.1 | Aquca_041_00154.1 | Ac2R-MYB36 | KQDKNKGAWSKQEDDKLDIYIQAHEGECWRSLPQAAGLNRCHKSCRLRWINYLRPDLKHGNAFEEDEDLIHLHALLGNRWSLIAGRLPGRTDNEVKNYWNSYLKRRKL                                   |
| <i>Aquilegia coerulea</i> v1.1 | Aquca_068_00041.1 | Ac2R-MYB37 | KANVKKGPWAPPEEDAKLKA YIEEYGTGGNWIALPQKIGLKRCKGKSCRLRWLNLYLRPNIKHGGFSDEEDSIIICSLYISIGSRWSIIAQLPGRTDNDIKNYWNTLKKKL                               |
| <i>Aquilegia coerulea</i> v1.1 | Aquca_002_00029.1 | Ac2R-MYB38 | MVMRKGPWMAEEDEILMDYVKKHGPRDSSIRSKGLLPRTGKSCRLRWVNLKLPDLKTGCKFSAEEERVIDLQARFGNWKWARIATYLQGRTDNDVKNFWSTRQKRLA                                    |
| <i>Aquilegia coerulea</i> v1.1 | Aquca_011_00322.1 | Ac2R-MYB39 | KIGLKRGPWSIEEDYKLMNFIINNGTQCWRMVPKHAGLLRCGKSCRLRWNYLRPDLKRGPLSEVEEDQIIQLHARLGNRWKSKIAEHFPGRTDNEIKNHWNTRIKRRL                                   |
| <i>Aquilegia coerulea</i> v1.1 | Aquca_038_00198.1 | Ac2R-MYB40 | KNGLKKGWPTPEEDQKLMDYIQKNGHGSWRTPKNAQLRQCGKSCRLRWNYLRPDLKRGFRSFEEDDIIQLHSLVGNKWSAIAARLPGRTDNEIKNYWNTHIRKRL                                      |
| <i>Aquilegia coerulea</i> v1.1 | Aquca_015_00086.1 | Ac2R-MYB41 | SSGLKKGWSEEEDDLLKCKIEKYGEGNWHKVPRLTGLNRCRCKSCRLRWNYLRPDLKRGKSAEERVIDLQARFGNWKWARIATYLQGRTDNDVKNFWSTRQKRLA                                      |
| <i>Aquilegia coerulea</i> v1.1 | Aquca_025_00333.1 | Ac2R-MYB42 | MEKEGSYYKGLWTEEDKILMDYISVHGKGRWSRIARITGLKRCGKSCRLRWNYLRPDLKRGKSAEERVIDLQARFGNWKWARIATYLQGRTDNDVKNFWSTRQKRLA                                    |
| <i>Aquilegia coerulea</i> v1.1 | Aquca_034_00423.1 | Ac2R-MYB43 | KAMYRKGWSPPEEDEKLRDYIFRYGHGCWSSLPVRLQNGKSCRLRWNYLRPDLKRGKSAEERVIDLQARFGNWKWARIATYLQGRTDNDVKNFWSTRQKRLA                                         |
| <i>Aquilegia coerulea</i> v1.1 | Aquca_015_00088.1 | Ac2R-MYB44 | TTGLKKGWTEEDTLLKRCIEKYGEGNWHKVPRLRAGLNRCRCKSCRLRWNYLRPDLKRGKSAEERVIDLQARFGNWKWARIATYLQGRTDNDVKNFWSTRQKRLA                                      |
| <i>Aquilegia coerulea</i> v1.1 | Aquca_015_00085.1 | Ac2R-MYB45 | SSSLKRGKWSIEEDDLLKCKIEKYGEGNWHKVPVPRAGLRCRCKSCRLRWNYLRPDLKRGKSAEERVIDLQARFGNWKWARIATYLQGRTDNDVKNFWSTRQKRLA                                     |
| <i>Aquilegia coerulea</i> v1.1 | Aquca_020_00444.1 | Ac2R-MYB46 | KQKLRKGLWSPEEDEKLLRHITKYGHGCWSSVPKQAGLQRCGKSCRLRWNYLRPDLKRGKSAEERVIDLQARFGNWKWARIATYLQGRTDNDVKNFWSTRQKRLA                                      |
| <i>Aquilegia coerulea</i> v1.1 | Aquca_003_00245.1 | Ac2R-MYB47 | KQKVRGLWSPEEDEKLLINISTYGHGCWSSVPRLAGLQRCGKSCRLRWNYLRPDLKRGKSAEERVIDLQARFGNWKWARIATYLQGRTDNDVKNFWSTRQKRLA                                       |
| <i>Aquilegia coerulea</i> v1.1 | Aquca_009_00493.1 | Ac2R-MYB48 | KVGLKRGWPTPEEDRILSNYIKKEGEGRWMLPKRAGLLRCGKSCRLRWNYLRPDLKRGKSAEERVIDLQARFGNWKWARIATYLQGRTDNDVKNFWSTRQKRLA                                       |
| <i>Aquilegia coerulea</i> v1.1 | Aquca_034_00364.1 | Ac2R-MYB49 | KMGLKRGWPTPEEDHLLVSIYIENGHNWRALPKLAGLLRCGKSCRLRWNYLRPDLKRGKSAEERVIDLQARFGNWKWARIATYLQGRTDNDVKNFWSTRQKRLA                                       |
| <i>Aquilegia coerulea</i> v1.1 | Aquca_013_00221.1 | Ac2R-MYB50 | QQKVRGLWSPEEDEKLLIRYITTHGYGCWSEVPEKAGLQRCGKSCRLRWNYLRPDLKRGKSAEERVIDLQARFGNWKWARIATYLQGRTDNDVKNFWSTRQKRLA                                      |
| <i>Aquilegia coerulea</i> v1.1 | Aquca_002_00170.1 | Ac2R-MYB51 | MEARSQYKRWLWTEEDQILMDYIRVHGKGRWNRVAKLGLKRCGKSCRLRWNYLRPDLKRGKSAEERVIDLQARFGNWKWARIATYLQGRTDNDVKNFWSTRQKRLA                                     |
| <i>Aquilegia coerulea</i> v1.1 | Aquca_007_00580.1 | Ac2R-MYB52 | KTDRKGPWSPPEEDQLTRLVDIHGARNWTLISRYIPGRSGKSCRLRWNYLRPDLKRGKSAEERVIDLQARFGNWKWARIATYLQGRTDNDVKNFWSTRQKRLA                                        |
| <i>Aquilegia coerulea</i> v1.1 | Aquca_002_00135.1 | Ac2R-MYB53 | EGEVKRGWPTPEEDLILINIANHGEGVWNSLARSAGLKRTGKSCRLRWNYLRPDLKRGKSAEERVIDLQARFGNWKWARIATYLQGRTDNDVKNFWSTRQKRLA                                       |
| <i>Aquilegia coerulea</i> v1.1 | Aquca_002_00118.1 | Ac2R-MYB54 | SFGSIKGNWTHEEDRKLVRLEKHGKNWAKVSSCMGGRIGKQCRDRWNHLEPGINKGCWTEDEDMALVEGHKHNNRWAKIAEIEPGRTDNAVKNRWNSVRRKRS                                        |
| <i>Aquilegia coerulea</i> v1.1 | Aquca_007_00776.1 | Ac2R-MYB55 | DLDRKGPWSPPEEDALQQLVQKHGPRNWSVISKIPGRSGKSCRLRWNYLRPDLKRGKSAEERVIDLQARFGNWKWARIATYLQGRTDNDVKNFWSTRQKRLA                                         |
| <i>Aquilegia coerulea</i> v1.1 | Aquca_011_00570.1 | Ac2R-MYB56 | MDTKRLVNGTWTAEEDQRLAEYIEIHGAKKWSVAVKAGLNRCCKSCRLRWNYLRPDLKRGKSAEERVIDLQARFGNWKWARIATYLQGRTDNDVKNFWSTRQKRLA                                     |
| <i>Aquilegia coerulea</i> v1.1 | Aquca_076_00099.1 | Ac2R-MYB57 | KQGMNRGAWSAHEDKILTDYIKIHGQGWRELPKRAGLRCGKSCRLRWNYLRPDLKRGKSAEERVIDLQARFGNWKWARIATYLQGRTDNDVKNFWSTRQKRLA                                        |
| <i>Aquilegia coerulea</i> v1.1 | Aquca_041_00011.1 | Ac2R-MYB58 | DFELRRGPWTEEDSLIHYIASHGEGRWDMALAKCSGLKRTGKSCRLRWNYLRPDLKRGKSAEERVIDLQARFGNWKWARIATYLQGRTDNDVKNFWSTRQKRLA                                       |
| <i>Aquilegia coerulea</i> v1.1 | Aquca_011_00323.1 | Ac2R-MYB59 | KIGLKRGPWTEIEDHKLMSFIINNGIHCWRMIPKHAGLLRCGKSCRLRWNYLRPDLKRGKSAEERVIDLQARFGNWKWARIATYLQGRTDNDVKNFWSTRQKRLA                                      |
| <i>Aquilegia coerulea</i> v1.1 | Aquca_015_00089.1 | Ac2R-MYB60 | TTALKKGAWTEEDTLLKRCIEKHGEGNWHKVPRLRAGLNRCRCKSCRLRWNYLRPDLKRGKSAEERVIDLQARFGNWKWARIATYLQGRTDNDVKNFWSTRQKRLA                                     |
| <i>Aquilegia coerulea</i> v1.1 | Aquca_062_00019.1 | Ac2R-MYB61 | KANVKKGPWSPPEEDSKLDYIDKHGTGGNWIALPQKAGLKRCKGKSCRLRWNYLRPDLKRGKSAEERVIDLQARFGNWKWARIATYLQGRTDNDVKNFWSTRQKRLA                                    |
| <i>Aquilegia coerulea</i> v1.1 | Aquca_030_00245.1 | Ac2R-MYB62 | KTGLKRGAWTPEEDGLLSAYIMRYGHWNWREIPKYAGLSRCGKSCRLRWNYLRPDLKRGKSAEERVIDLQARFGNWKWARIATYLQGRTDNDVKNFWSTRQKRLA                                      |
| <i>Aquilegia coerulea</i> v1.1 | Aquca_042_00080.1 | Ac2R-MYB63 | MLNGRIGKQCRERWQNLCPDIKKQDWCVEEDKAFIDAHKEFGNHWAKIAKLPGRTEAIAIKNRWNTYRKYK                                                                        |
| <i>Aquilegia coerulea</i> v1.1 | Aquca_045_00020.1 | Ac2R-MYB64 | STTLKQGWTEQEDRLLVCLVKENGVKKWSQIAHKMVGGRAGKQCRERWNLHLPDIKKDSWSEEEIIMLIEAHEKFGNRWAEIAKQIPGRSENAIKNHWNATKRRQT                                     |
| <i>Aquilegia coerulea</i> v1.1 | Aquca_083_00054.1 | Ac2R-MYB65 | DLDRKGPWSPPEEDLLTKLVERHGRNWSLISKIPGRSGKSCRLRWNYLRPDLKRGKSAEERVIDLQARFGNWKWARIATYLQGRTDNDVKNFWSTRQKRLA                                          |
| <i>Aquilegia coerulea</i> v1.1 | Aquca_005_00025.1 | Ac2R-MYB66 | SVTLKKGWPTAEEDAILIEYVRKHGEGNWA VQKNSGLSRCGKSCRLRWANHLRPNLKKGSFSPEEERLILELHAKLGNKWARMAAQLPGRTDNEIKNYWNTVRRKRS                                   |
| <i>Aquilegia coerulea</i> v1.1 | Aquca_073_00028.1 | Ac2R-MYB67 | DFDIKRGWPTIDEDLLL VNYIATHGEGRWSSLARSAGLKRTGKSCRLRWNYLRPDLKRGKSAEERVIDLQARFGNWKWARIATYLQGRTDNDVKNFWSTRQKRLA                                     |
| <i>Aquilegia coerulea</i> v1.1 | Aquca_002_00902.1 | Ac2R-MYB68 | EQGWRKGPWTAEEEDKLLTEYVTLHGEGRWSTVARSAGLNRSKSCRLRWNYLRPDLKRGKSAEERVIDLQARFGNWKWARIATYLQGRTDNDVKNFWSTRQKRLA                                      |
| <i>Aquilegia coerulea</i> v1.1 | Aquca_030_00246.1 | Ac2R-MYB69 | KTGLTRGTWTEEDRLLTAYIKRYGHWNWRELPKYAAALCIWLIFLFGDEGLRPESEEVTDNSKIAMQSLNSELGLSRCGKSCRLRWNYLRPDLKRGKSAEERVIDLQARFGNWKWARIATYLQGRTDNDVKNFWSTRQKRLA |
| <i>Aquilegia coerulea</i> v1.1 | Aquca_081_00025.1 | Ac2R-MYB70 | DIVIRKGPWMAEEDEILIDYVKKHGPRDSSIRSKGLLRRTGKSCRLRWVNLKLPDLKTGCKFSAEEERVIDLQARFGNWKWARIATYLQGRTDNDVKNFWSTRQKRLA                                   |
| <i>Aquilegia coerulea</i> v1.1 | Aquca_014_00829.1 | Ac2R-MYB71 | NVKLKGLWSPEEDDKLMNYMLNQGQWSDVARNAGLQRCGKSCRLRWNYLRPDLKRGKSAEERVIDLQARFGNWKWARIATYLQGRTDNDVKNFWSTRQKRLA                                         |
| <i>Aquilegia coerulea</i> v1.1 | Aquca_047_00006.1 | Ac2R-MYB72 | NSNVRKGAWNQDEDLKRCIEKYGEGNWHQVPMRAGNTRWTDPRLNRCRCKSCRLRWNYLRPDLKRGKSAEERVIDLQARFGNWKWARIATYLQGRTDNDVKNFWSTRQKRLA                               |
| <i>Aquilegia coerulea</i> v1.1 | Aquca_053_00075.1 | Ac2R-MYB73 | VKSCSRGHWKPGEDARLIELVSQFGPQNWNLIAEKLEGRSGKSCRLRWNYLRPDLKRGKSAEERVIDLQARFGNWKWARIATYLQGRTDNDVKNFWSTRQKRLA                                       |
| <i>Aquilegia coerulea</i> v1.1 | Aquca_009_00018.1 | Ac2R-MYB74 | KDGKKGWPTPEEDIIILASYIQEHGPGNWRVPTNTGLLRCSKSCRLRWNYLRPDLKRGKSAEERVIDLQARFGNWKWARIATYLQGRTDNDVKNFWSTRQKRLA                                       |
| <i>Aquilegia coerulea</i> v1.1 | Aquca_015_00090.1 | Ac2R-MYB75 | SFTLNKGAWTEEDRLLKCKIEIHGEGNWHKVPRLRAGLNRCRCKSCRLRWNYLRPDLKRGKSAEERVIDLQARFGNWKWARIATYLQGRTDNDVKNFWSTRQKRLA                                     |
| <i>Aquilegia coerulea</i> v1.1 | Aquca_001_00435.1 | Ac3R-MYB1  | TRRSTKGGWTAEEEDALLCRAVQRFQGNWKKIAECFKERTDVQCLHRWQKVLNPELVKGPWSKEEDDIIIVEMVKKYGAKKWS TIAQALPGRIGKQCRERWHNHLNPAINKDA                             |
| <i>Aquilegia coerulea</i> v1.1 | Aquca_013_00366.1 | Ac3R-MYB2  | PIRRAKGGWTPQEDELRS AVEAFKGCWKKIAEFFPDRSEVQCLHRWQKVLNPELVKGPWSKEEDERILELVDKYGCKKWSVIAQSLPGRIGKQCRERWHNHLNPAIKKHA                                |
| <i>Aquilegia coerulea</i> v1.1 | Aquca_003_00045.1 | Ac3R-MYB3  | EEELSLMNAQREYGNKWAEIAKVLPGRTDNSIKNHWNSSLKKKL                                                                                                   |

|                               |                      |             |                                                                                                                                                                                                                                                      |
|-------------------------------|----------------------|-------------|------------------------------------------------------------------------------------------------------------------------------------------------------------------------------------------------------------------------------------------------------|
| <i>Solanum tuberosum v3.4</i> | PGSC0003DMP40000076  | Si2R-MYB001 | KNGLTRGPWTPEEDEKLIQFINKNGHGSWRSLPKLAGLLRCGKSCRLRWNTNLRPNIRGPFSPPEEQKLVQLHGLGNRWAAIASQLPGRTDNEIKNLWNTHLKKRL                                                                                                                                           |
| <i>Solanum tuberosum v3.4</i> | PGSC0003DMP40000691  | Si2R-MYB002 | KTKVKRGPWSPEEDNILKNYLEKNGTGGNWISLPQKAGLRKCGKSCRLRWLNLYLRPDIKHGGFTEEDNIILTYRQIGSRWSVIAANLPRRTDNDVKNHWNTLKKKKH                                                                                                                                         |
| <i>Solanum tuberosum v3.4</i> | PGSC0003DMP40000947  | Si2R-MYB003 | DVEVRKGPWTMEEDLILINYIANHGEVWNSLARSAGLKRGTGKSCRLRWLNLYLRPDRRGNITPEEQLLIMELHAKWGNRWSKIAKHLPGRTDNEIKNFWRTRIQKHI<br>KTGVKKGPWTPEEDIMLVSVFVQEHGPGNWRVTPHTGSLFLLDLYSQSEFRARLIVWLRRCSKSCRLRWNTNLYLRPGIKRGSFTDQEEKMIQLQALLGNKWAASLYLPERTDND<br>IKNYWNTHLKKKL |
| <i>Solanum tuberosum v3.4</i> | PGSC0003DMP400002378 | Si2R-MYB004 | KVGLKKGWPWTPEEDQKLLAYIEEHGHGSWRALPAKAGLQRCGKSCRLRWNTNLYLRPDIKRGKFTLQEEQTIQLHALLGNRWSAIATHLPKRTDNEIKNYWNTHLKKRL                                                                                                                                       |
| <i>Solanum tuberosum v3.4</i> | PGSC0003DMP400002398 | Si2R-MYB005 | KVGLKKGWPWTPEEDQKLLAYIEEHGHGSWRALPAKAGLQRCGKSCRLRWNTNLYLRPDIKRGKFTLQEEQTIQLHALLGNRWSAIATHLPKRTDNEIKNYWNTHLKKRL                                                                                                                                       |
| <i>Solanum tuberosum v3.4</i> | PGSC0003DMP400002480 | Si2R-MYB006 | EQGWRKGPWTPEEDKLLSEYVNLHGEGRWSSVSRACGLNRTGKSCRLRWVNYLRPGLKRGHITPQEEGIIELHALWGNKWSIARYLPGRTDNEIKNYWRTHFKTKV                                                                                                                                           |
| <i>Solanum tuberosum v3.4</i> | PGSC0003DMP400002707 | Si2R-MYB007 | EVGWRKGPWTSDEDRLLIEYVKLHGEGRWNSVARLTGLRRNGKSCRLRWVNYLRPDLKRGQITPHEERIIELHARWGNRWSIARSLPGRTDNEIKNYWRTHFKKKS                                                                                                                                           |
| <i>Solanum tuberosum v3.4</i> | PGSC0003DMP400003606 | Si2R-MYB008 | KANVKKGPWSPEEDAKLKEYIDKFGTGGNWIALPQKAGLRRCGKSCRLRWLNLYLRPNIKHGEFSDEEDRIICSLYANIGSRWSIIAAQLPGRTDNDIKNYWNTLKKKKL                                                                                                                                       |
| <i>Solanum tuberosum v3.4</i> | PGSC0003DMP400005110 | Si2R-MYB009 | KEGLKKGWPWTHDEDQKLLAYVEEHYGSWSDPLRAGLQRCGRSCRLRWVNYLRPNIKRKGFSSEERTIFKLHALLGNRWSIASHLPNRSDNEIKNYWNTHLKKRL                                                                                                                                            |
| <i>Solanum tuberosum v3.4</i> | PGSC0003DMP400005118 | Si2R-MYB010 | VCFELQEDDILREQIRIHGDDNWTIIASFNKDKTTRQCKRRWFTYLNDFKGGWSPEEDMLLCAAQKIFGNRWTEIAKVVSGRTDNAVKNRFTTICKKKA                                                                                                                                                  |
| <i>Solanum tuberosum v3.4</i> | PGSC0003DMP400005949 | Si2R-MYB011 | RIKGPWSPEEDELQTLVEKHGPRNWTLSKSVPGRSGKSCRLRWCNQLSPQVEHRAFTPEEDDTIIRAHAKYGNKWATIARLLSGRTDNAIKNHWNSTLKRKC                                                                                                                                               |
| <i>Solanum tuberosum v3.4</i> | PGSC0003DMP400006918 | Si2R-MYB012 | KANVKKGPWSPEEDAKLKEYIDKFGTGGNWIALPQKAGLRRCGKSCRLRWLNLYLRPNIKHGEFSDEEDRIICSLYGNIGSRWSIIAAQLPGRTDNDIKNYWNTLKKKKL                                                                                                                                       |
| <i>Solanum tuberosum v3.4</i> | PGSC0003DMP400007770 | Si2R-MYB013 | KVGLKRGRWVTEEDERLTNYIQANGEGSWRTLPKNAGLLRCGKSCRLRWVNYLRPNIKRKGFSSEERTIFKLHALLGNRWSIASHLPNRSDNEIKNYWNTHLKKRL                                                                                                                                           |
| <i>Solanum tuberosum v3.4</i> | PGSC0003DMP400008158 | Si2R-MYB014 | ELRRGPWSVEEDFVLMNYISHHGEGRWNSLRCAGLKRGTGKSCRLRWLNLYLRPDRRGNITLQEEQLLILQLHSRWGNRWSKIAQHLPGRTDNEIKNYWRTRVQKHA                                                                                                                                          |
| <i>Solanum tuberosum v3.4</i> | PGSC0003DMP400008159 | Si2R-MYB015 | NLDLKRGSWTVEEDFTLMNHIALHGEGRWNSLARSAGLKRGTGKSCRLRWLNLYLRPDRRGNITLQEEQLLILQLHSRWGNRWSKIAQHLPGRTDNEIKNYWRTRVQKQA                                                                                                                                       |
| <i>Solanum tuberosum v3.4</i> | PGSC0003DMP400008160 | Si2R-MYB016 | ELRRGSWTVEEDYILMNYISHHGEGRWNSLRCAGLKRGTGKSCRLRWLNLYLRPNVRHGNITLQEEQLLILQLHFRWGNRWSKIAEHLPGRTDNEIKNYWRTRVQKHA                                                                                                                                         |
| <i>Solanum tuberosum v3.4</i> | PGSC0003DMP400008480 | Si2R-MYB017 | KLGVKKGPWTAEDDKLINFILNGQCCWRAVPKLAGLRRCGKSCRLRWNTNLYLRPDLKRGGLSEAEELVIDLHARLGNRWSKIAARLPGRTDNEIKNHWNTHIKKKL                                                                                                                                          |
| <i>Solanum tuberosum v3.4</i> | PGSC0003DMP400008822 | Si2R-MYB018 | KNNVKGWPWSPEEDAKLKSIEYQNGTGGNWIALPQKIGLRKCGKSCRLRWLNLYLRPNIKHGGFSEEDRIICSLYISIGSRWSIIAAQLPGRTDNDIKNYWNTLKKKKL                                                                                                                                        |
| <i>Solanum tuberosum v3.4</i> | PGSC0003DMP400009936 | Si2R-MYB019 | DIELRRGPWTIEEDKLLVHYITNHGEGRWNMLAKHAGLKRGTGKSCRLRWLNLYLRPDKRGNLTPQEEQLLILELHSLKGNRWSKIAQYLPGRTDNEIKNYWRTRVQKQA                                                                                                                                       |
| <i>Solanum tuberosum v3.4</i> | PGSC0003DMP400010367 | Si2R-MYB020 | KEGLRKGWPSTKEDLLANYIKENGEQWRNLPNKAGLLRCGKSCRLRWVNYLRPDIKRGKFSSEERTIFKLHALLGNRWSIASHLPNRSDNEIKNYWNTHLKKRL                                                                                                                                             |
| <i>Solanum tuberosum v3.4</i> | PGSC0003DMP400010496 | Si2R-MYB021 | GLPLKKGWPWTAEDAILVEYVTKHGEGNWNAVQKHSGLARCGKSCRLRWANHLRPLDKGAFPTPEERHIIELHAKMGNKWARMMAELPGRTDNEIKNYWNTRIKRRQ                                                                                                                                          |
| <i>Solanum tuberosum v3.4</i> | PGSC0003DMP400010956 | Si2R-MYB022 | KAHTNKGAWTKEEDERLISYIRTHGEGCWRSLPKAAGLLRCGKSCRLRWVNYLRPDLKRGNFTEEEDELIKHLHSLGNKWSIAGRLPGRTDNEIKNYWNTHIRRKL                                                                                                                                           |
| <i>Solanum tuberosum v3.4</i> | PGSC0003DMP400011365 | Si2R-MYB023 | ENGLKKGWPWTPEEDQILVDYIDKHGHGSWRALPKLAGLNRGKSCRLRWNTNLYLRPDIKRGKFSSEEEETILHLHSILGNKWSAIATHLSGRTDNEIKNFWNTHLKKKL                                                                                                                                       |
| <i>Solanum tuberosum v3.4</i> | PGSC0003DMP400012169 | Si2R-MYB024 | LGKLRKGLWSPEEDEKLSYMLTNGQGCWSDIARNAGLQRCGKSCRLRWVNYLRPDLKRGAFSLQEEELIVHLHSILGNRWSQIARLPGRTDNEIKNFWNSTIKKRL                                                                                                                                           |
| <i>Solanum tuberosum v3.4</i> | PGSC0003DMP400012270 | Si2R-MYB025 | KVGKKGWPWTPEEDIILVSYVQHQHGPGNWRALPTKTLGHRCSKSCRLRWNTNLYLRPDIKRGKFSSEEEETILHLHSILGNKWSAIATHLSGRTDNEIKNFWNTHLKKKL                                                                                                                                      |
| <i>Solanum tuberosum v3.4</i> | PGSC0003DMP400012935 | Si2R-MYB026 | KVGLKRGRWVTEEDIIITNYIQANGEGSWRSLPKNAGLLRCGKSCRLRWVNYLRPDLKRGAFSLQEEELIVHLHSILGNRWSQIARLPGRTDNEIKNFWNSTIKKRL                                                                                                                                          |
| <i>Solanum tuberosum v3.4</i> | PGSC0003DMP400012972 | Si2R-MYB027 | KQKVKRGLWSPEEDEKLKIHINTHGNSCWSSVPKLAGLQRCGKSCRLRWVNYLRPDLKRGKFSSEEEETILHLHSILGNRWSQIARLPGRTDNEIKNFWNSTIKKRL                                                                                                                                          |
| <i>Solanum tuberosum v3.4</i> | PGSC0003DMP400013034 | Si2R-MYB028 | NVKLRKGLWSPEEDEKLMHYMLTNGQGCWSDVARNAGLQRCGKSCRLRWVNYLRPDLKRGAFSLQEEELIVHLHSILGNRWSQIARLPGRTDNEIKNFWNSTIKKRL                                                                                                                                          |
| <i>Solanum tuberosum v3.4</i> | PGSC0003DMP400014055 | Si2R-MYB029 | SERIKGPWTAEDDKLTKLVERYGARNWSLISKYIKGRSGKSCRLRWVNYLRPDIKRGKFSSEEEETILHLHSILGNRWSQIARLPGRTDNEIKNFWNSTIKKRL                                                                                                                                             |
| <i>Solanum tuberosum v3.4</i> | PGSC0003DMP400014627 | Si2R-MYB030 | IKKGAWSPPEEDQKLRGYIMKYGIWNWQMPKFAGLSRTGKSCRLRWVNYLRPDRRGNITLQEEQLLILQLHSRWGNRWSKIAQHLPGRTDNEIKNYWRTRVQKQA                                                                                                                                            |
| <i>Solanum tuberosum v3.4</i> | PGSC0003DMP400014987 | Si2R-MYB031 | KANVKGWPWTAEDAKILAYVATHGIGNWTLVPQKAGLNRGKSCRLRWNTNLYLRPDLKHDNFTPQEEDECIHLKHTIGSRWSIAKQLPGRTDNDVKNYWNTHLKKKL                                                                                                                                          |
| <i>Solanum tuberosum v3.4</i> | PGSC0003DMP400015271 | Si2R-MYB032 | KDNVKGQWTPPEEDHKLSSYIAQHGTNRWRLIPKHAGLQRCGKSCRLRWNTNLYLRPDLKHGQFSEEGEETIVLHSLVGNRWSVIAAQLPGRTDNDVKNHWNTLKKKKL                                                                                                                                        |
| <i>Solanum tuberosum v3.4</i> | PGSC0003DMP400015397 | Si2R-MYB033 | DMDLRRGPWTVEEDFTLMNYIAHHGEGRWNSLARCAGLKRGTGKSCRLRWLNLYLRPDRRGNITLQEEQLLILELHSLKGNRWSKIAQHLPGRTDNEIKNYWRTRVQKQA                                                                                                                                       |
| <i>Solanum tuberosum v3.4</i> | PGSC0003DMP400015891 | Si2R-MYB034 | KVGIKRGRWTAEDQILTNYILSNGEWSRSLPKNAGLLRCGKSCRLRWVNYLRPDLKRGKFSSEEEETILHLHSILGNRWSIAGRLPGRTDNEIKNYWNTLKKKL                                                                                                                                             |
| <i>Solanum tuberosum v3.4</i> | PGSC0003DMP400019896 | Si2R-MYB035 | KSKVKKGPWTTSEDLKLSFIQKHGHGNWRALPKQAGLLRCGKSCRLRWVNYLRPDKRGNFTPEEDTIINLHRAFGNRWSKIASHLPGRTDNEIKNVWNTHLKKRL                                                                                                                                            |
| <i>Solanum tuberosum v3.4</i> | PGSC0003DMP400019914 | Si2R-MYB036 | KNGLKKGWPWTTEEDQKLIDYIQKNGSGNWRILPKNAGLQRCGKSCRLRWNTNLYLRPDIKRGKFSLEEEETIHLHSILGNKWSAIAARLPGRTDNEIKNYWNTLKKKL                                                                                                                                        |
| <i>Solanum tuberosum v3.4</i> | PGSC0003DMP400020363 | Si2R-MYB037 | RIMIKGGVWKNTEDEILKAAVMKYGKNQWARISLLVRKSAKQCKARWYEWLDPISIKKTEWTRREEDEKLLHLAKLMPTQWRTIAPIVGRTPSQCLERYEKLLDAAC                                                                                                                                          |
| <i>Solanum tuberosum v3.4</i> | PGSC0003DMP400021198 | Si2R-MYB038 | KIGLRKGPWTIEEDHRLMNFILNNGIQCWRLVPKLAGLMRCGKSCRLRWVNYLRPDLKRGALTEAEEDMIKLSQLGNRWSKIAHGFGRTDNEIKNHWNTRIKKKL                                                                                                                                            |
| <i>Solanum tuberosum v3.4</i> | PGSC0003DMP400021429 | Si2R-MYB039 | KEGLRKGWPSTKEDLLTNYINQYEGEQWRSLPKNAGLLRCGKSCRLRWVNYLRPDIKRGKFSSEEEETILHLHSILGNRWSIAGRLPGRTDNEIKNYWNTLKKKL                                                                                                                                            |
| <i>Solanum tuberosum v3.4</i> | PGSC0003DMP400022407 | Si2R-MYB040 | RVGLKRGWVTEEDHKLHVFILNNGIQCWRTVPKLAGLQRCGKSCRLRWVNYLRPDLKRGALTEAEEDMIKLSQLGNRWSKIAHGFGRTDNEIKNHWNTRIKKKL                                                                                                                                             |
| <i>Solanum tuberosum v3.4</i> | PGSC0003DMP400023376 | Si2R-MYB041 | KAHTNKGAWTKEEDERLISYIRTHGEGCWRSLPKAAGLLRCGKSCRLRWVNYLRPDLKRGNFSEEEDELIKHLHSLGNKWSIAGRLPGRTDNEIKNYWNTLKKKL                                                                                                                                            |
| <i>Solanum tuberosum v3.4</i> | PGSC0003DMP400023726 | Si2R-MYB042 | KTSLKKGPDHEEDQILISYINKNGHSNWRALPKQAGLLRCGKSCRLRWVNYLRPDIKRGKFSLEEEETIHLHSILGNRWSIAGRLPGRTDNEIKNVWNTHLKKRL                                                                                                                                            |
| <i>Solanum tuberosum v3.4</i> | PGSC0003DMP400024309 | Si2R-MYB043 | KSLKKGWVTEEDDKLAAVYTKYGCWNWRQLPKFAGLSRCGKSCRLRWVNYLRPDIKRGKFSLEEEETIHLHSILGNRWSIAGRLPGRTDNEIKNVWNTHLKKRL                                                                                                                                             |
| <i>Solanum tuberosum v3.4</i> | PGSC0003DMP400024514 | Si2R-MYB044 | ARQLKKGWVTTTEDEAILMEYVKKHGEGNWNAVQRNSGLMRCGKSCRLRWANHLRPHLKKGAFSLEEEERLIVELHAKLGNKWARMMAAQLPGRTDNEIKNYWNTLKKRL                                                                                                                                       |

|                               |                      |             |                                                                                                                |
|-------------------------------|----------------------|-------------|----------------------------------------------------------------------------------------------------------------|
| <i>Solanum tuberosum v3.4</i> | PGSC0003DMP400025180 | Si2R-MYB045 | KQKHKKGLWSPDEDDRLKNIYIKHGHGCWSSVPINAGLQRNGKSCRLRWINYLRPGLKRGAFSLEEEDTILTLHAMFGNKWSQIAQHLPGRTDNEIKNHWSYLKRRV    |
| <i>Solanum tuberosum v3.4</i> | PGSC0003DMP400025629 | Si2R-MYB046 | ELFELRRGPWTEEDNLIHYISTHDEGRWNAALAKCAGLKRTGKSCRLRWLNLYKPDIKRGNLTPQEQLLILELHSHKWNRSKIAQHLPGRTDNEIKNYWRTRVQKQA    |
| <i>Solanum tuberosum v3.4</i> | PGSC0003DMP400027224 | Si2R-MYB047 | EEIMRRGPWTEEDVQLLFYVKLFGDRRWDFLAKVSLKRTGKSCRLRWVNYLNPDLKHGKMTPEERLVELEHSHKWNRSRIARKIPGRTDNEIKNYWRTHMRKKA       |
| <i>Solanum tuberosum v3.4</i> | PGSC0003DMP400027453 | Si2R-MYB048 | KVGLKKGWTAEEEDKILNINNGQCCWRAVPKLAGLLRCGKSCRLRWNYLRPDLKRGLLSEYEEKMVIDLHAQLGNRWSKIASHLPGRTDNEIKNHWNTHIKKLL       |
| <i>Solanum tuberosum v3.4</i> | PGSC0003DMP400027651 | Si2R-MYB049 | KQKLRKGLWSPEEDEKLINHITKYGHGCWSSVPKLAALQRCGKSCRLRWINYLRPDLKRGTFQSQEEENLIQLHSLGKNSQIASRLPGRTDNEIKNLWNSSIKKKL     |
| <i>Solanum tuberosum v3.4</i> | PGSC0003DMP400028466 | Si2R-MYB050 | KMGLKKGWSPPEEDNILSIIQNNGHSNWRALPKLAGLLRCGKSCRLRWNYLRPDLKRGNTFKEEEDTIKLNENLGNRWSAIAARLPGRTDNEIKNIWHTNLKKKL      |
| <i>Solanum tuberosum v3.4</i> | PGSC0003DMP400030100 | Si2R-MYB051 | KMGLKKGWTPPEEDQILSIIQSNHGHNWRALPKLAGLLRCGKSCRLRWNYLRPDLKRGNTFKEEEDSIIQLHEMLGNRWSAIAARLPGRTDNEIKNIWHTNLKKKL     |
| <i>Solanum tuberosum v3.4</i> | PGSC0003DMP400030609 | Si2R-MYB052 | DEDLKKGPWTSEEDKLMDFISKNGHTNWQLIPKAGLNRCGKSCRLRWNYLRPDLKRGFEFSIEEEIINLHSLGKNSRIAHLPGRTDNEIKNFYNTHLRKKL          |
| <i>Solanum tuberosum v3.4</i> | PGSC0003DMP400031526 | Si2R-MYB053 | KSKSVKQWTEEDRILDLVERFGDRKWSQIAQVQLKGRIGKQCRERWHNHLRDPDIKDLWTEEDMILIKAAHEIGNKWAIEAKLAGRTENSINKHNWNTKRRQF        |
| <i>Solanum tuberosum v3.4</i> | PGSC0003DMP400031557 | Si2R-MYB054 | KQKLRKGLWSPEEDEKLCNYITNFGIGSWSSVPKLAGLQRCGKSCRLRWINYLRPDLKRGMFSDQEEEDKIIISLHQVGLGNRWAQIAAQLPGRTDNEIKNFWNSLKKKL |
| <i>Solanum tuberosum v3.4</i> | PGSC0003DMP400031848 | Si2R-MYB055 | KQKLRKGLWSPEEDEKLKIHITKFGHGCWSSVPKLAGLQRCGKSCRLRWINYLRPDLKRGTFQSDEENLIIELHVLGNKWSQIAARLPGRTDNEIKNLWNSSIKKKL    |
| <i>Solanum tuberosum v3.4</i> | PGSC0003DMP400031943 | Si2R-MYB056 | KNGLKKGWTPPEEDNKLIQYIQLHGPNGWRALPKNAGLQRCGKSCRLRWNYLRPDLKRGFRSFEDEETIIQLHSVLGNKWSAIAARLPGRTDNEIKNYWNTHIRKRL    |
| <i>Solanum tuberosum v3.4</i> | PGSC0003DMP400032077 | Si2R-MYB057 | KEGLKKGWTPPEEDQKLLSFDIKHGCWSRALPAKAGLQRCGKSCRLRWINYLRPDLKRGKFSLQEERTIIQLHALLGNRWSAIAAYLPSRTDNEIKNYWNSRLKRR     |
| <i>Solanum tuberosum v3.4</i> | PGSC0003DMP400032103 | Si2R-MYB058 | ARGHWRPAEDAKLKVVAIYGPQNWNLIAEKLEGRSGKSCRLRWFNQLDPRINRAFSEEEERLMAAHRLYGNKWAMARLPFGRTDNAVKNHWHVIMARKY            |
| <i>Solanum tuberosum v3.4</i> | PGSC0003DMP400032125 | Si2R-MYB059 | EEGLKKGWTPHEEDQKLLSFDIKHGCWSRALPAKAGLQRCGKSCRLRWINYLRPDLKRGKFSLQEERTIIHLHALLGNRWSAIAATYLPSTRTDNEIKNYWNSRLKRR   |
| <i>Solanum tuberosum v3.4</i> | PGSC0003DMP400032674 | Si2R-MYB060 | KANVKKGPWSPPEEDATLKYIEENGTTGNWIALPKQIGLKRKCGKSCRLRWLNLYRPNIKHGGFTEEDNIICSLYISIGSRWSIAAQLPGRTDNDIKNYWNTLRKRR    |
| <i>Solanum tuberosum v3.4</i> | PGSC0003DMP400033945 | Si2R-MYB061 | KIGVKKGPWTPPEEDIILVSYIQHGPNGWRVPSNTGLLRCSKSCRLRWNYLRPDLKRGKFSLQEERTIIHLHALLGNRWSAIAAYLPSRTDNDIKNYWNTLRKRR      |
| <i>Solanum tuberosum v3.4</i> | PGSC0003DMP400034714 | Si2R-MYB062 | YVKKGAWSPPEEDQKLMIDYIMQYRIWNSHMPKFAGLSRTGKSCRLRWNYLRPDLKKGPFSEEEVEIVFRMYQSLGNKWSAIAKELPGRTDNEIKNFYHTHLKHH      |
| <i>Solanum tuberosum v3.4</i> | PGSC0003DMP400034715 | Si2R-MYB063 | MDYVKKGAWSPPEEDQKLIDYIMQYRIWNSHMPKFAGLSRTGKSCRLRWNYLRPDLKKGPFSEEEVEIVIRMYQSLGNRWSAIAKELPGRTDNEIKNFYHTHLKHH     |
| <i>Solanum tuberosum v3.4</i> | PGSC0003DMP400034798 | Si2R-MYB064 | KLGLKRGWSPKEDDLINIKKNGHPNWRALPKLAGLLRCGKSCRLRWNYLRPDLKRGNTFQEEEDTIKHLQVGLGNRWSAIAARLPGRTDNEIKNIWHTLRKRR        |
| <i>Solanum tuberosum v3.4</i> | PGSC0003DMP400035326 | Si2R-MYB065 | TADRVKGPWSPPEEDAILSRLVSNFGARNWSLIARGIPGRSGKSCRLRWCNQLDPAVKRPFTEEDRIILQAHAHGNKWSIARLLPGRTDNAIKNHWNSTLRRRC       |
| <i>Solanum tuberosum v3.4</i> | PGSC0003DMP400037090 | Si2R-MYB066 | KANVKGWSPPEEDSKLKYIEQHGTTGNWITLPQKVLKRCGKSCRLRWLNLYRPNIKHGEFTDEEDNIICLYMSIGSRWSIAAQLPGRTDNDIKNYWNTLRKRR        |
| <i>Solanum tuberosum v3.4</i> | PGSC0003DMP400037546 | Si2R-MYB067 | KKGLKKGWTPPEEDEKLVEYIKNHGHSWRSLPHLAGLARCAGKSCRLRWNYLRPDLKRGPFSHDEEKLVIQLHGILGNRWSAIAAQLPGRTDNEIKNLWNTHLKRR     |
| <i>Solanum tuberosum v3.4</i> | PGSC0003DMP400038822 | Si2R-MYB068 | KNGLKKGWTPPEEDQKLIDYIQKHGYGNWRTLPKNAGLQRCGKSCRLRWNYLRPDLKRGFRSFEDEETIIQLHSILGNKWSAIAARLPGRTDNEIKNYWNTHIRKRL    |
| <i>Solanum tuberosum v3.4</i> | PGSC0003DMP400039333 | Si2R-MYB069 | SVPLKKGWTSAEEDVILVDYVMTHGEGNWNVAQRHSLARCAGKSCRLRWANHLRDLKKGAFTEPEEQRIVELHAKMGKWARMAVELPGRTDNEIKNYWNTRIKRRQ     |
| <i>Solanum tuberosum v3.4</i> | PGSC0003DMP400040480 | Si2R-MYB070 | KMGLKKGWTPQEEEDQILITFIQKYGHENWRALPKQAGLLRCGKSCRLRWNYLRPDLKRGNTFSEEEEQIIKHLQLLGNRWSAIAARLPGRTDNEIKNFWHTHLKRR    |
| <i>Solanum tuberosum v3.4</i> | PGSC0003DMP400040530 | Si2R-MYB071 | NFGLKKGWTPDEEDELVKYIQVNGEGSWRSLPKNAGLSRCGKSCRLRWNYLRPDLKRGKFTAEDEIIVKLHSTLGNRWSIAAQLPGRTDNDIKNYWNSNLRRRI       |
| <i>Solanum tuberosum v3.4</i> | PGSC0003DMP400042037 | Si2R-MYB072 | KVGLKKGWTPPEEDQKLMYIEKNGCGSWRALPTKAGLKRKCGKSCRLRWNYLRPDLKRGKFSLQEEQTIQLHALLGNRWSAIAATHLANRDNNEIKNYWNTHLKRR     |
| <i>Solanum tuberosum v3.4</i> | PGSC0003DMP400043024 | Si2R-MYB073 | RSSCQRGHRPAEDERLQVLEQYGPQWNSIAEKLQGRSGKSCRLRWFNQLDPRINRRPSEDEEERLIGAHRIHGNKVALISRLPGRTDNAVKNHWHVLMARKQ         |
| <i>Solanum tuberosum v3.4</i> | PGSC0003DMP400043359 | Si2R-MYB074 | RVKGPWSPPEEDQLLQVQKHGPRNWSLISKIPGRSGKSCRLRWCNQLSPQVEHRAFTPEEETIIRAHARFGNKWATIRLLNGRTDNAIKNHWNSTLKRRC           |
| <i>Solanum tuberosum v3.4</i> | PGSC0003DMP400044377 | Si2R-MYB075 | PKERHIVSWSQEEEDILREQIRIHGTDNWTHIASKFKDKTTRQCRRRWFTYLNDSFKKGGWSPPEEDMLLCEAQKIFGNRWTEIAKVVSGRTDNAVKNRFTTLCKRA    |
| <i>Solanum tuberosum v3.4</i> | PGSC0003DMP400045417 | Si2R-MYB076 | ESGRKKGWTPLEEDKLLAAYITKYGSWNWRQLPKYAGLARCAGKSCRLRWNYLRPDLKRGNTFKEEEDIIILNHAQLGNKWSIAAHLPERSDNEIKNHWHHTLKKRA    |
| <i>Solanum tuberosum v3.4</i> | PGSC0003DMP400045418 | Si2R-MYB077 | ENGRKKGWTPPEEDRKLAAAYITKYGSWNWRQLPKYAGLARCAGKSCRLRWNYLRPDLKRGNTFKEEEDIIILNHAQLGNKWSIAAHLPERSDNEIKNHWHHTLKKRT   |
| <i>Solanum tuberosum v3.4</i> | PGSC0003DMP400046268 | Si2R-MYB078 | KNGLKKGWTPPEEDQKLIQYIYVHGPNWRNLPKNAGLQRCGKSCRLRWNYLRPDLKRGFRSFEDEETIIQLHSVLGNKWSAIAARLPGRTDNEIKNYWNTHIRKRL     |
| <i>Solanum tuberosum v3.4</i> | PGSC0003DMP400046481 | Si2R-MYB079 | ITTCIDVCFELQEDDILREQIRIHGIDNWTIASNFKDKTTRQCRRRWFTYLNDSFKKGGWSPPEEDMLLCAAQKIFGNRWTEIAKVVSGRTDNAVKNRFTTLCKKA     |
| <i>Solanum tuberosum v3.4</i> | PGSC0003DMP400047028 | Si2R-MYB080 | KEKTRKGLWSPEEDEKLYNYITRFGVGCWSSVPKLAGLQRCGKSCRLRWNYLRPDLKRGMFSDQEEEDMIITLHKVGNRWAQIAAKLPGRTDNEIKNFWNSNLKRR     |
| <i>Solanum tuberosum v3.4</i> | PGSC0003DMP400047194 | Si2R-MYB081 | VMELRRGPWTEEDFTLNFIAHHGEGRWNSLRCAGLKRKRTGKSCRLRWLNLYRDPVRRGNITLLEQLLILELHRSRWGNRWSKIAQHLPGRTDNEIKNYWRTRVQKHA   |
| <i>Solanum tuberosum v3.4</i> | PGSC0003DMP400047253 | Si2R-MYB082 | SSGRVKEPWSPEEDGILTELVNKFGARNWSMIAQGIAGRSGKSCRLRWCNQLDPVLRKPFTEEDHIIINAHAHVGKNAIAKLLPGRTDNAIKNHWNSTLRRRF        |
| <i>Solanum tuberosum v3.4</i> | PGSC0003DMP400047280 | Si2R-MYB083 | EEWRKGPWTPVEEDKLLIEYVNLHGEGRWNSVARLAGLKRNGKSCRLRWVNYLRPDLKRGQITPYEERIIELHAIWGNRWSIARSLPGRTDNEIKNYWRTRVFKKFF    |
| <i>Solanum tuberosum v3.4</i> | PGSC0003DMP400047694 | Si2R-MYB084 | GSPLKKGWPIKAEDAILMDYVAKYEGGNWSSVHRRTGLARCAGKSCRLRWANHLKPDLLKGAFTQEEELIEMHAKIGNKWARMAAEFPGRTDNDIKNFWNTLRKRRQ    |
| <i>Solanum tuberosum v3.4</i> | PGSC0003DMP400047957 | Si2R-MYB085 | VKKGAWSPQEDKLLIDYIAYRNWNSQMPKFAGLSRTGKSCRLRWNYLRPDLKRGPFSEETQTVIRMYQSLGSRWSAIAKELPGRTDNEIKNFYHTHLKHH           |
| <i>Solanum tuberosum v3.4</i> | PGSC0003DMP400048854 | Si2R-MYB086 | SRGHWRPHEDAKLKVYQYGPQNWNLIAEKLEGRSGKSCRLRWFNQLDPRINRAFSEEEERLLVAHKMYGNKWSMIARLPFGRTDNAVKNHWHVIMARKH            |
| <i>Solanum tuberosum v3.4</i> | PGSC0003DMP400048867 | Si2R-MYB087 | KIGIKGPWTPPEEDILVSYIQEHGPNWRSVPTNTGLMRCGKSCRLRWNYLRPDLKRGNTFPEEGMIIHLQALLGNKWSAIAAYLPSRTDNDIKNYWNTHLKRR        |
| <i>Solanum tuberosum v3.4</i> | PGSC0003DMP400049170 | Si2R-MYB088 | EEELRRGQWLEEEDERLSMMVGVGFERRWDALAKTSGLRSGKSCRLRWLNLYRPNLKHGHITADEERLIIRLQKQFGNKWSKIAKQLPGRTDNEIKNYWRSHLRKKT    |
| <i>Solanum tuberosum v3.4</i> | PGSC0003DMP400050448 | Si2R-MYB089 | RQALKKGWTPAGEDAILMDYVKKHGEGNWNAVQRNSGLMRCGKSCRLRWANHLRPHLKGAFTEPEEERIIIDLHAKLGNKWARMAAQLPGRTDNEIKNYWNTLRKRRQ   |

|                                  |                      |             |                                                                                                                                                                                 |
|----------------------------------|----------------------|-------------|---------------------------------------------------------------------------------------------------------------------------------------------------------------------------------|
| <i>Solanum tuberosum</i> v3.4    | PGSC0003DMP400053171 | Sl2R-MYB090 | KEEMHKGAWSKQEDQKLIDYTTKHGEGCWRDLPKAAGLLRCGKSCRLRWMNLYLNPNLKRGNFSEDEDDLIKLHALLGNRWSLIAGRLPGRTDNEVKNYWNSYLRRKL                                                                    |
| <i>Solanum tuberosum</i> v3.4    | PGSC0003DMP400053853 | Sl2R-MYB091 | RMKRGFWKPEEDLILKNCVETHGEGNWATISEKSGLMRSKSCRLRWKNYLRPNIKRGMSEDEKDLIIRLHKLGNRWSLIAGRLPGRTDNEVKNFWNTHLNNKR                                                                         |
| <i>Solanum tuberosum</i> v3.4    | PGSC0003DMP400054072 | Sl2R-MYB092 | SRGHWRPHEDEKLRELVAKYGPHNWAIALNLQGRSGKSCRLRWYNQLDPRINRSPFTEEEERLLSSHRIHGNRWAMIARLPGRTDNAVKNHWHVMSRKC                                                                             |
| <i>Solanum tuberosum</i> v3.4    | PGSC0003DMP400054558 | Sl2R-MYB093 | KAHTNKGAWTKEEDQLINIRAHGEGCWRSLPKAAGLSRCGKSCRLRWYLRPDLKRGNFTEEEDELIKLHSLGKNSVIAGRLPGRTDNEIKNYWNTHIKRRKL                                                                          |
| <i>Solanum tuberosum</i> v3.4    | PGSC0003DMP400055794 | Sl2R-MYB094 | KTGVKKGWPTPEEDIILVSYIQEHGPGNWRNIPTNTGLLRCSKSCRLRWYLRPDLKRGNFTEHEEKMIHLQALLGNRWAAIASYLPQRTDNDIKNYWNTHLKKKL                                                                       |
| <i>Solanum tuberosum</i> v3.4    | PGSC0003DMP400056681 | Sl2R-MYB095 | MIKRRWNPEEDELQKLVEEHGPKNWFLIGLQIPGRSEKLCRFRWCNQRNPQVDHRPFTLDEDDTIKAHAKFGNQWAMIACLLPGRTDNAIKNHWSFLKRRK                                                                           |
| <i>Solanum tuberosum</i> v3.4    | PGSC0003DMP400057504 | Sl2R-MYB096 | KEGLKKGWTKKEDLLLTEYIKDFGEGTGWRSLPKAGLLRCGKSCRLRWYLRPDLKRGNFTEHEEKMIHLQALLGNRWAAIASYLPQRTDNDIKNYWNTHLKKKL                                                                        |
| <i>Solanum tuberosum</i> v3.4    | PGSC0003DMP400058999 | Sl2R-MYB097 | KSKSSKGQWTIEEDRLLIHLVEKFGIRKWSQIAQMLKGRIGKQCRERWHNHLRPDIKDFWTEEEEDRILIQAHGEVGNKWAEIAKRLPGRTEANSIKNHWNATKRRQF                                                                    |
| <i>Solanum tuberosum</i> v3.4    | PGSC0003DMP400059142 | Sl2R-MYB098 | KQKVKRGLWSPEEDELINITYYTHGACWSSVPLAGLQRCGKSCRLRWYLRPDLKRGFSFQEAALIELHGILGNRWAIKHLPGRTDNEVKNFWNSSIKKKL                                                                            |
| <i>Solanum tuberosum</i> v3.4    | PGSC0003DMP400061017 | Sl2R-MYB099 | KSKVKGAWSCCEEDRLITFIQKHGHQNWRSPLKQAGLLRCGKSCRLRWYLRPDLKRGNFTEHEEKMIHLQALLGNRWAAIASYLPQRTDNDIKNYWNTHLKRRR                                                                        |
| <i>Solanum tuberosum</i> v3.4    | PGSC0003DMP400065030 | Sl2R-MYB100 | STNMKKGAWSPDEEDQKLKSYIMKFGIWNWSHMPKFAGLSRTGKSCRLRWYLRPDLKRGFPFTMEEVEIVIKTYQELGNRWSAIAGRLPGRTDNEIKNFHHTHLKQKL                                                                    |
| <i>Solanum tuberosum</i> v3.4    | PGSC0003DMP400066245 | Sl2R-MYB101 | TNYLIKQWTEEDRLLRLVQKQFVGRKWAQIAEKMEARAGKQCRERWHNHLRPDIKDFWTEEEEDRILVESHKQLGNKWAEIAKRIPGRTEANSIKNHWNATKRRQN                                                                      |
| <i>Solanum tuberosum</i> v3.4    | PGSC0003DMP400066962 | Sl2R-MYB102 | MIKRRWNPEEDELHKLVEHGAENWSLISLQISSRSKSCRFWWCNQPVEHRPFTLEEDNTIIRAHAKLGNRWAKIAHLLPGRTDNAIKNHWNATKRRK                                                                               |
| <i>Solanum tuberosum</i> v3.4    | PGSC0003DMP400015671 | Sl3R-MYB1   | PIIRAKGGWTPPEEDTLKRAVSRYRGKWCWKIAEFPPDRSEVQCLHRWQKVINPELVKGPWTREEDDKIELVAKYGPIKWSVIAKSLTGRIGKQCRERWHNHLNPNIKKDAWTL<br>EEERALIDAHRIHGKNAEIAKVLPRGTDNGIKNHWNSSLKKKL               |
| <i>Solanum tuberosum</i> v3.4    | PGSC0003DMP400005488 | Sl3R-MYB2   | GPTKRSSQAGWTEEDNLLTEVVERFKGRNWKIGKTIYSVMLYTFQLAECLNRTDQVCLHRWQKVLNPELVKGPWTKEEDDLIELVEKHGCKKWSNIANSLPGRIGKQCRE<br>RWHNHLDPITTKDAWTEQEELVLCYHYQLYGNKWAKIARFLPGRTDNAIKNHWNSTLKKRL |
| <i>Solanum lycopersicum</i> v2.3 | Solyc01g005660.1     | Sl2R-MYB001 | KIGLKRGPWTPPEEDELMMNYVSKEGEGRWRTLPKAGLFRGKSCRLRWYLRPDLKRGNFTEHEEKMIHLQALLGNRWAAIASYLPQRTDNDIKNYWNTHLKRRR                                                                        |
| <i>Solanum lycopersicum</i> v2.3 | Solyc01g009070.2     | Sl2R-MYB002 | SVPLKKGWPTS AEDVILVDYVMTHGEGNWA VQRHSGLARCGKSCRLRWANHLRPDLKKGAFTEEEQRIVELHAKMGKWARMAVELPGRTDNEIKNYWNTRIKRRQ                                                                     |
| <i>Solanum lycopersicum</i> v2.3 | Solyc01g010910.1     | Sl2R-MYB003 | KVGLKKGWPTPEEDQKLMDYIEKNGCGSWRALPTKAGLKRCGKSCRLRWYLRPDLKRGKFSLQEEQTIQLHALLGNRWSAIATHLANRDNNEIKNYWNTHLKRRR                                                                       |
| <i>Solanum lycopersicum</i> v2.3 | Solyc01g057910.2     | Sl2R-MYB004 | DMDLRRGPWTEEDLTLMNIAIHHGEGRWNTLARCAGLKRGTGKSCRLRWYLRPDLKRGNFTEHEEKMIHLQALLGNRWAAIASYLPQRTDNDIKNYWNTHLKRRR                                                                       |
| <i>Solanum lycopersicum</i> v2.3 | Solyc01g079620.2     | Sl2R-MYB005 | KVGIKRGRWTAEDQILTNIIISNGEGSWRSLPKNAGLLRCGKSCRLRWYLRPDLKRGNFTEHEEKMIHLQALLGNRWAAIASYLPQRTDNDIKNYWNTHLKRRR                                                                        |
| <i>Solanum lycopersicum</i> v2.3 | Solyc01g087130.2     | Sl2R-MYB006 | LGKLRKGLWSPEEDELMSYMLRNGQGCWSDIARNAGLQRCGKSCRLRWYLRPDLKRGAFSLQEEELIVHLHSILGNRWSQIAARLPGRTDNEIKNFWNSTIKKRS                                                                       |
| <i>Solanum lycopersicum</i> v2.3 | Solyc01g090530.1     | Sl2R-MYB007 | MSEIKKGPWKEEEDQVLIKHVKKYGPDRWSSIRSCKGLLQRTGKSCRLRWYLRPDLKRGNFTEHEEKMIHLQALLGNRWAAIASYLPQRTDNDIKNYWNTHLKRRR                                                                      |
| <i>Solanum lycopersicum</i> v2.3 | Solyc01g094360.2     | Sl2R-MYB008 | KNGLTRGPWTPPEEDELQVQFINKNGHGSWRSLPKAGLLRCGKSCRLRWYLRPDLKRGAFSLQEEELIVHLHSILGNRWSQIAARLPGRTDNEIKNFWNSTIKKRS                                                                      |
| <i>Solanum lycopersicum</i> v2.3 | Solyc01g102340.2     | Sl2R-MYB009 | KQKLRKGLWSPEEDELKIKHITKFGHGCWSSVPLAGLQRCGKSCRLRWYLRPDLKRGTFSDQEEENLIELHVLGNKWSQIAARLPGRTDNEIKNFWNSTIKKRS                                                                        |
| <i>Solanum lycopersicum</i> v2.3 | Solyc01g111500.2     | Sl2R-MYB010 | KAHTNKGAWTKEEDERLISYIKTHGEGCWRSLPKAAGLLRCGKSCRLRWYLRPDLKRGNFTEHEEKMIHLQALLGNRWAAIASYLPQRTDNDIKNYWNTHLKRRR                                                                       |
| <i>Solanum lycopersicum</i> v2.3 | Solyc02g067340.2     | Sl2R-MYB011 | KMGVKKGPWTPPEEDIMLVSYVQHGPGNWRALPTKGLRRCGKSCRLRWYLRPDLKRGNFTEHEEKMIHLQALLGNRWAAIASYLPQRTDNDIKNYWNTHLKRRR                                                                        |
| <i>Solanum lycopersicum</i> v2.3 | Solyc02g067760.2     | Sl2R-MYB012 | DVEVRKGPWTEEDLILINIANHGEVWNSLAKSAGLKRGTGKSCRLRWYLRPDLKRGNFTEHEEKMIHLQALLGNRWAAIASYLPQRTDNDIKNYWNTHLKRRR                                                                         |
| <i>Solanum lycopersicum</i> v2.3 | Solyc02g079280.2     | Sl2R-MYB013 | KNGLKKGWPTPEEDQKLIDYIQKHGYGNWRTLPKNAGLQRCGKSCRLRWYLRPDLKRGTFSDQEEENLIELHVLGNKWSQIAARLPGRTDNEIKNFWNSTIKKRS                                                                       |
| <i>Solanum lycopersicum</i> v2.3 | Solyc02g082040.2     | Sl2R-MYB014 | KQKVKRGLWSPEEDELKIKHIKTHGHCWSSVPLAGLQRCGKSCRLRWYLRPDLKRGCFSEQEEERIIIDVHRILGNRWAIKHLPGRTDNEVKNFWNSSIKKKL                                                                         |
| <i>Solanum lycopersicum</i> v2.3 | Solyc02g087960.2     | Sl2R-MYB015 | KTGVKKGWPTPEEDIMLVSYVQHGPGNWRALPTKGLRRCGKSCRLRWYLRPDLKRGNFTEHEEKMIHLQALLGNRWAAIASYLPQRTDNDIKNYWNTHLKRRR                                                                         |
| <i>Solanum lycopersicum</i> v2.3 | Solyc02g088190.2     | Sl2R-MYB016 | KVGLKKGWPTPEEDQKLLAYIEEHGHSWRALPTKAGLQRCGKSCRLRWYLRPDLKRGKFTLQEEQTIQLHALLGNRWSAIATHLSKRDNNEIKNYWNTHLKRRR                                                                        |
| <i>Solanum lycopersicum</i> v2.3 | Solyc02g089190.1     | Sl2R-MYB017 | EQGWRKGPWTPPEEDKLLSEYNLHGEGRWSSVSRGALNRTGKSCRLRWYLRPDLKRGNFTEHEEKMIHLQALLGNRWAAIASYLPQRTDNDIKNYWNTHLKRRR                                                                        |
| <i>Solanum lycopersicum</i> v2.3 | Solyc02g091980.1     | Sl2R-MYB018 | KANVKGWSPPEEDSKLAKAYIEQHGTGGNWTLPQKVGKRCGKSCRLRWYLRPDLKRGNFTEHEEKMIHLQALLGNRWAAIASYLPQRTDNDIKNYWNTHLKRRR                                                                        |
| <i>Solanum lycopersicum</i> v2.3 | Solyc02g092930.1     | Sl2R-MYB019 | MDRVKGPWSPEEDELQQLVQKHGPRNWSLISKIPGRSGKSCRLRWYLRPDLKRGNFTEHEEKMIHLQALLGNRWAAIASYLPQRTDNDIKNYWNTHLKRRR                                                                           |
| <i>Solanum lycopersicum</i> v2.3 | Solyc02g093740.2     | Sl2R-MYB020 | RVGLKRGWPTPEEDHKLIVHFNNGIQCWRTVPKLAGLQRCGKSCRLRWYLRPDLKRGALFSEEDQIIEHLARLGNRWSKIASYFPGRTDNEIKNFHHTHLKQKL                                                                        |
| <i>Solanum lycopersicum</i> v2.3 | Solyc03g005570.2     | Sl2R-MYB021 | KTSLKKGSDWHEEDQILISYINKNGHGNWRALPRQAGLLRCGKSCRLRWYLRPDLKRGNFTEHEEKMIHLQALLGNRWAAIASYLPQRTDNDIKNYWNTHLKRRR                                                                       |
| <i>Solanum lycopersicum</i> v2.3 | Solyc03g025870.2     | Sl2R-MYB022 | KQKHKKGLWSPDEEDRLKNYMIKHGHGCWSSVPINAGLQRNGKSCRLRWYLRPDLKRGAFSLQEEELIVHLHSILGNRWSQIAARLPGRTDNEIKNFWNSTIKKRS                                                                      |
| <i>Solanum lycopersicum</i> v2.3 | Solyc03g059200.1     | Sl2R-MYB023 | KANVKGWPTAEDAKILAYVATHGIGNWTLVPQKAGLNRCGKSCRLRWYLRPDLKRGNFTEHEEKMIHLQALLGNRWAAIASYLPQRTDNDIKNYWNTHLKRRR                                                                         |
| <i>Solanum lycopersicum</i> v2.3 | Solyc03g093890.2     | Sl2R-MYB024 | EAIKKGAWSPEDQKLRGYIMKYGIWNWRQMPKFAGLSRTGKSCRLRWYLRPDLKRGNFTEHEEKMIHLQALLGNRWAAIASYLPQRTDNDIKNYWNTHLKRRR                                                                         |
| <i>Solanum lycopersicum</i> v2.3 | Solyc03g093930.2     | Sl2R-MYB025 | STNMKKGAWSPEDQKLKSYIMKFGIWNWSHMPKFAGLSRTGKSCRLRWYLRPDLKRGFPFTMEEVEIVIKTYQELGNRWSAIAGRLPGRTDNEIKNFHHTHLKQKL                                                                      |
| <i>Solanum lycopersicum</i> v2.3 | Solyc03g093940.1     | Sl2R-MYB026 | MEDIIKKGAWSPEDQKLDYVMRFGIWNWNLMPKFAGLSRTGKSCRLRWYLRPDLKRGFPFTMEEVEIVIKTYQELGNRWSAIAGRLPGRTDNEIKNFHHTHLKQKL                                                                      |
| <i>Solanum lycopersicum</i> v2.3 | Solyc03g112390.2     | Sl2R-MYB027 | KQKLRKGLWSPEEDELKSNYITNFGIGSWSSVPLAGLQRCGKSCRLRWYLRPDLKRGMFSDQEEENLIELHVLGNKWSQIAARLPGRTDNEIKNFWNSSIKKKL                                                                        |
| <i>Solanum lycopersicum</i> v2.3 | Solyc03g112890.1     | Sl2R-MYB028 | KSKSVKQWTEEDRILINLVERFGDRKWSQIAQVLKGRIGKQCRERWHNHLRPDIKDFWTEEEEDRILIQAHGEVGNKWAEIAKRLPGRTEANSIKNHWNATKRRQF                                                                      |
| <i>Solanum lycopersicum</i> v2.3 | Solyc03g116100.2     | Sl2R-MYB029 | KIGVKKGPWTPPEEDIILVSYIQHGPGNWRALVPSNTGLLRCSKSCRLRWYLRPDLKRGNFTEHEEKMIHLQALLGNRWAAIASYLPQRTDNDIKNYWNTHLKRRR                                                                      |



|                                  |                  |             |                                                                                                                  |
|----------------------------------|------------------|-------------|------------------------------------------------------------------------------------------------------------------|
| <i>Solanum lycopersicum</i> v2.3 | Solyc03g119370.1 | SI2R-MYB030 | DIELRRGPWTIEEDKLLVHYITNHGEGRWMLAKHAGLKRTGKSCRLRWLNLYKPDVVRGNLTPQEQLLILELHSLKGNRWSKIAQYLPGRTDNEIKNYWRTRVQKQA      |
| <i>Solanum lycopersicum</i> v2.3 | Solyc03g121740.1 | SI2R-MYB031 | KQVKRGLWSPEEDEKLINITYGHACWSSVPKLAGLQRCGKSCRLRWLNLYRDLKRGFSFQEAALIIELHGLGNRWAQIAKHLPGRTDNEVKNFVNSSIKKKL           |
| <i>Solanum lycopersicum</i> v2.3 | Solyc04g005600.1 | SI2R-MYB032 | KDGLKKGPTWTHDEDQKLLAYVDEHGYGWSWDLPLRAGLQRCGRSCLRWLNLYRPNIRKGFSSSEERTIFQLHALLGNRWSIIASHLPNRSNDNEIKNYWNTLKKRL      |
| <i>Solanum lycopersicum</i> v2.3 | Solyc04g005710.1 | SI2R-MYB033 | PKERHIVSWSQEEDDILREQIRIHGIDDNWTIIASNFKDKTTRQCKRRWFTYLNDFKKGGSPEEDMLLCAAQKIFGNRWTEIAKVVSGRTDNAVKNRFTTCKKKA        |
| <i>Solanum lycopersicum</i> v2.3 | Solyc04g009950.2 | SI2R-MYB034 | RIMIKGGVWKNTEDEILKAAVMKYGKNQWARISSLLVRKSAKQCKARWYEWLDPISIKTEWTREEDEKLLHLAKLMPTQWRTIPIVGRTPSQCLERYEKLDAAC         |
| <i>Solanum lycopersicum</i> v2.3 | Solyc04g014470.2 | SI2R-MYB035 | KNEVKKGPWSSEEDKLLTNFILNNGQCCWRSPLKLAGLLRCGKSCRLRWLNLYRDLKRGLLSEYEEKMVIDLHAQLGNRWSKIASHLPGRTDNEIKNHWNTHIKKKL      |
| <i>Solanum lycopersicum</i> v2.3 | Solyc04g056310.2 | SI2R-MYB036 | MGRSPFCDEIGLKKGPWTPEEDQKLNHIKKGHGSWRALPKLAGLNRGKSCRLRWLNLYRDLKRGKFSQEEEQITLNLHAILGNKWSAIAATHLPGRTDNEIKNFWNTHLKKL |
| <i>Solanum lycopersicum</i> v2.3 | Solyc04g064540.2 | SI2R-MYB037 | MAEGGGSGDDTTRSSCPRGHRPAEDEKLRLVEQYGPQNWNSIAEKLQGRSGKSCRLRWLNLYRDLKRGKFSQEEEQITLNLHAILGNKWSAIAATHLPGRTDNAVKNHWHVL |
| <i>Solanum lycopersicum</i> v2.3 | Solyc04g074170.1 | SI2R-MYB038 | MARKQ                                                                                                            |
| <i>Solanum lycopersicum</i> v2.3 | Solyc04g074170.1 | SI2R-MYB038 | ENGLKKGPTWPEEDQILVDYIDKHGHSWRALPKLAGLNRGKSCRLRWLNLYRDLKRGKFSQEEEQITLNLHAILGNKWSAIAATHLPGRTDNEIKNFWNTHLKKKLI      |
| <i>Solanum lycopersicum</i> v2.3 | Solyc04g077260.2 | SI2R-MYB039 | KNNVKGWPSPPEEDAKLKSIEQNGTGGNWIALPKQIGLKRKCGKSCRLRWLNLYRPNIKHGGFSEEDRIICSLYISIGSRWSIIAQLPGRTDNDIKNYWNTLKKKLL      |
| <i>Solanum lycopersicum</i> v2.3 | Solyc04g078420.1 | SI2R-MYB040 | DSDRIKGPWSPEEDELQTLVEKHGPRNWTLSKSVPRSGKSCRLRWLNLYRDLKRGKFSQEEEQITLNLHAILGNKWSAIAATHLPGRTDNAIKNHWNSTLKRKC         |
| <i>Solanum lycopersicum</i> v2.3 | Solyc04g079360.1 | SI2R-MYB041 | KSERIKGPWSAEEDKILTKLVERYGARNWSLISKYIKGRSGKSCRLRWLNLYRDLKRGKFSQEEEQITLNLHAILGNKWSAIAATHLPGRTDNAVKNHWNSTLKRKY      |
| <i>Solanum lycopersicum</i> v2.3 | Solyc05g007160.2 | SI2R-MYB042 | PKERHIVSWSQEEDDILREQIRIHGTDNWTIIASKFKDKTTRQCKRRWFTYLNDFKKGGSPEEDMLLCEAQKIFGNRWTEIAKVVSGRTDNAVKNRFTTCKKRA         |
| <i>Solanum lycopersicum</i> v2.3 | Solyc05g007690.1 | SI2R-MYB043 | EEGLKKGPTWTHEEDQKLLSFIDKHGCGSWRGLPAKAGLQRCGKSCRLRWLNLYRDLKRGKFSQEEEQITLNLHAILGNRWSAIAATHLPGRTDNEIKNYWNSRLKKRL    |
| <i>Solanum lycopersicum</i> v2.3 | Solyc05g007710.2 | SI2R-MYB044 | KEGLKKGPTWPEEDQKLLSFIDTYGCGSWRALPAKAGLQRCGKSCRLRWLNLYRDLKRGKFSQEEEQITLNLHAILGNRWSAIAATHLPGRTDNEIKNYWNSRLKKRL     |
| <i>Solanum lycopersicum</i> v2.3 | Solyc05g007870.1 | SI2R-MYB045 | SKLCARGHWRPAEDAKLKVIAIYGPQNWNLIAEKLEGRSGKSCRLRWLNLYRDLKRGKFSQEEEQITLNLHAILGNRWSAIAATHLPGRTDNAVKNHWHVIMARKY       |
| <i>Solanum lycopersicum</i> v2.3 | Solyc05g008250.1 | SI2R-MYB046 | NKEEMHKGAWSKQEDQKLDIYITKHGEGCWRNLPKAAAGLLRCGKSCRLRWLNLYRDLKRGKFSQEEEQITLNLHAILGNRWSAIAATHLPGRTDNEVKNYWNHSLTRKL   |
| <i>Solanum lycopersicum</i> v2.3 | Solyc05g009230.1 | SI2R-MYB047 | LFELRRGPWTLEEDNLIHYISTHGEGRWALAKCAGLKRTGKSCRLRWLNLYRDLKRGKFSQEEEQITLNLHAILGNRWSAIAATHLPGRTDNEIKNYWRTRVQKQA       |
| <i>Solanum lycopersicum</i> v2.3 | Solyc05g014290.2 | SI2R-MYB048 | KIGLKRGPWTIEEDHKLMLNFILNNGIQCWRLVPLKLAGLMRCGKSCRLRWLNLYRDLKRGKFSQEEEQITLNLHAILGNRWSAIAATHLPGRTDNEIKNHWNTRIKKKL   |
| <i>Solanum lycopersicum</i> v2.3 | Solyc05g048830.2 | SI2R-MYB049 | KKGLKKGPTWPEEDEKLVEYIKNHGHSWRSLPHLAGLARCAGKSCRLRWLNLYRDLKRGKFSQEEEQITLNLHAILGNRWSAIAATHLPGRTDNEIKNLWNTHLKKRL     |
| <i>Solanum lycopersicum</i> v2.3 | Solyc05g051550.1 | SI2R-MYB050 | ENGLKKGPTWPEEDQKLTNHNKHGHSWRALPKLAGLNRGKSCRLRWLNLYRDLKRGKFSQEEEQITLNLHAILGNKWSAIAATHLPGRTDNEIKNFWNTHLKKKL        |
| <i>Solanum lycopersicum</i> v2.3 | Solyc05g052850.2 | SI2R-MYB051 | SSGRVKEPWSPEEDAVALTELVNKFGARNWSMIAQGIAGRSKSCRLRWLNLYRDLKRGKFSQEEEQITLNLHAILGNKWSAIAATHLPGRTDNAIKNHWNSTLRRRF      |
| <i>Solanum lycopersicum</i> v2.3 | Solyc05g053150.1 | SI2R-MYB052 | EEEWKGPWTVEEDKLLIDYVNLHGEGRWNCVARLAGLKRNGKSCRLRWLNLYRDLKRGKFSQEEEQITLNLHAILGNRWSAIAATHLPGRTDNEIKNYWRTHFKKKV      |
| <i>Solanum lycopersicum</i> v2.3 | Solyc05g053330.2 | SI2R-MYB053 | VMDLRRGPWTVEEDFTLINFIAHHGEGRWNSLARCAGLKRTGKSCRLRWLNLYRDLKRGKFSQEEEQITLNLHAILGNRWSAIAATHLPGRTDNEIKNYWRTRVQKHA     |
| <i>Solanum lycopersicum</i> v2.3 | Solyc05g055030.1 | SI2R-MYB054 | KMGLKKGPTWQEEQILINFIQKYGHENWRALPKQAGLLRCGKSCRLRWLNLYRDLKRGKFSQEEEQITLNLHAILGNRWSAIAATHLPGRTDNEIKNFWHTHLKKRL      |
| <i>Solanum lycopersicum</i> v2.3 | Solyc06g005330.2 | SI2R-MYB055 | QEAMRKGPMWEQEDLQAFYVNLGDRRWDFLAKVSGLRRTGKSCRLRWLNLYRDLKRGKFSQEEEQITLNLHAILGNRWSAIAATHLPGRTDNEIKNYWRTHMRKKA       |
| <i>Solanum lycopersicum</i> v2.3 | Solyc06g009410.1 | SI2R-MYB056 | SMEMNKGPMWSSDEDSKLIHSISIFGQGRWDSLAVAGLKRSCKSCRLRWLNLYRDLKRGKFSQEEEQITLNLHAILGNRWSAIAATHLPGRTDNEIKNYWRTHMRKKA     |
| <i>Solanum lycopersicum</i> v2.3 | Solyc06g009480.1 | SI2R-MYB057 | TKV                                                                                                              |
| <i>Solanum lycopersicum</i> v2.3 | Solyc06g009480.1 | SI2R-MYB057 | SMEMKKGPMWSSDEDSKLIHSISIFGQGRWDSLAVAGLKRSGKSCRLRWLNLYRDLKRGKFSQEEEQITLNLHAILGNRWSAIAATHLPGRSDNDVKNYWRTRVQKHA     |
| <i>Solanum lycopersicum</i> v2.3 | Solyc06g009710.2 | SI2R-MYB058 | KVGLKRGRWTSEEDILTNYIQANGEGSWRSLPKNAGLLRCGKSCRLRWLNLYRDLKRGKFSQEEEQITLNLHAILGNRWSAIAATHLPGRTDNEIKNYWNSHLRRKV      |
| <i>Solanum lycopersicum</i> v2.3 | Solyc06g033870.1 | SI2R-MYB059 | MGYVKKGAWSPQEDKLLDHIAYRIWNWSQMPKFAGLSRTGKSCRLRWLNLYRDLKRGKFSQEEEQITLNLHAILGNRWSAIAATHLPGRTDNEIKNFYHTLKKHV        |
| <i>Solanum lycopersicum</i> v2.3 | Solyc06g034000.1 | SI2R-MYB060 | MDYVKKGAWSPQEDQKLVYIMKYRIWNWSHMPKFAGLSRTGKSCRLRWLNLYRDLKRGKFSQEEEQITLNLHAILGNRWSAIAATHLPGRTDNEIKNFYHTLKKHL       |
| <i>Solanum lycopersicum</i> v2.3 | Solyc06g053610.2 | SI2R-MYB061 | KMGLKKGPTWQEDNILSIYQNNGHSNWRALPKLAGLRCGKSCRLRWLNLYRDLKRGKFSQEEEQITLNLHAILGNRWSAIAATHLPGRTDNEIKNIWHTLKKKL         |
| <i>Solanum lycopersicum</i> v2.3 | Solyc06g065100.2 | SI2R-MYB062 | KAHTNKGAWTKEEDQLINIRAHGEGCWRSLPKAAGLSRCGKSCRLRWLNLYRDLKRGKFSQEEEQITLNLHAILGNRWSAIAATHLPGRTDNEIKNYWNTLKKKL        |
| <i>Solanum lycopersicum</i> v2.3 | Solyc06g069850.2 | SI2R-MYB063 | KSGVKKGPWTPEEDILVSYIQEHGPGNWRNIPTNTGLLRCSKSCRLRWLNLYRDLKRGKFSQEEEQITLNLHAILGNRWSAIAATHLPGRTDNDIKNYWNTLKKKL       |
| <i>Solanum lycopersicum</i> v2.3 | Solyc06g071520.1 | SI2R-MYB064 | KSKSSKGQWTIEEDRLLIHLVDKFGVRKWSQIAQMLKGRIGKQCRERWHNHLRDLKRGKFSQEEEQITLNLHAILGNRWSAIAATHLPGRTEANSIKNHWNATKRRQF     |
| <i>Solanum lycopersicum</i> v2.3 | Solyc06g071690.2 | SI2R-MYB065 | KEKTRKGLWSPEEDEKLNYITRFGVGCWSSVPKLAGLQRCGKSCRLRWLNLYRDLKRGKFSQEEEQITLNLHAILGNRWSAIAATHLPGRTDNEIKNFVNSNLKRL       |
| <i>Solanum lycopersicum</i> v2.3 | Solyc06g073640.2 | SI2R-MYB066 | GLPLKKGPTWTAEDAILVEYVTKHGEGNWNAVQKHSGLARCAGKSCRLRWLNLYRDLKRGKFSQEEEQITLNLHAILGNRWSAIAATHLPGRTDNEIKNYWNTLKKKL     |
| <i>Solanum lycopersicum</i> v2.3 | Solyc06g074910.2 | SI2R-MYB067 | KNNVKGWPSPPEEDAKLKEFIEKYGTGGNWIALPKQKIGLKRKCGKSCRLRWLNLYRPNIKHGGFSEEDRIICSLYISIGSRWSIIAQLPGRTDNDIKNYWNTLKKKLL    |
| <i>Solanum lycopersicum</i> v2.3 | Solyc06g074920.1 | SI2R-MYB068 | KINVKKGPWSPEEDAALKEFIEKYGTGGNWIALPKQKIGLKRKCGKSCRLRWLNLYRPNIRHGGFSEEDRIICSLYISIGSRWSIIAQLPGRTDNDIKNYWNTLKKKLF    |
| <i>Solanum lycopersicum</i> v2.3 | Solyc06g076840.1 | SI2R-MYB069 | TNYLIKQWTDDEDRKLLRLVKQFVGRKWAQIAEKMEARAGKQCRERWHNHLRDLKRGKFSQEEEQITLNLHAILGNRWSAIAATHLPGRTEANSIKNHWNATKRRQN      |
| <i>Solanum lycopersicum</i> v2.3 | Solyc06g083900.2 | SI2R-MYB070 | KLGLKRGKFSQEEEDYLLINIKNGHPNWRALPKLAGLRCGKSCRLRWLNLYRDLKRGKFSQEEEQITLNLHAILGNRWSAIAATHLPGRTDNEIKNIWHTLKKKR        |
| <i>Solanum lycopersicum</i> v2.3 | Solyc07g006750.2 | SI2R-MYB071 | KANVKKGPWSPEEDATLKAIEENGTTGNNWIALPKQKIGLKRKCGKSCRLRWLNLYRPNIKHGGFSEEDRIICSLYISIGSRWSIIAQLPGRTDNDIKNYWNTLKKKLL    |
| <i>Solanum lycopersicum</i> v2.3 | Solyc07g008010.2 | SI2R-MYB072 | MKDVKTRMKRFGWKPEEDLILKNCVETHGEGNWATISEKSGLMRSGKSCRLRWLNLYRPNIRHGGFSEEDRIICSLYISIGSRWSIIAQLPGRTDNEVKNFVNSNLKRL    |
| <i>Solanum lycopersicum</i> v2.3 | Solyc07g052300.2 | SI2R-MYB073 | RQALKKGPWTAGEDAILMDYVKKHGEGNWNAVQRNSGLMRCGKSCRLRWLNLYRDLKRGKFSQEEEQITLNLHAILGNRWSAIAATHLPGRTDNEIKNYWNTLKKKL      |

|                                  |                  |             |                                                                                                                |
|----------------------------------|------------------|-------------|----------------------------------------------------------------------------------------------------------------|
| <i>Solanum lycopersicum</i> v2.3 | Solyc07g053230.2 | SI2R-MYB074 | ENGRKKGTWTPPEEDRKLAAAYITKYGSWNWRQLPKYAGLARCGKSCRLRWNYLRPNVVRGNYTKEEDEIILNLHAQLGNKWSAIAIHLPGRSNDNEIKNHWHHTLKKRA |
| <i>Solanum lycopersicum</i> v2.3 | Solyc07g053240.2 | SI2R-MYB075 | EHGRKKGTWTPPEEDRKLAAAYITKYGSWNWRQLPKYAGLARCGKSCRLRWNYLRPNVVRGNYTKEEDEIILNLHAQLGNKWSIAHSLPGRSNDNEIKNHWHHTVKKRA  |
| <i>Solanum lycopersicum</i> v2.3 | Solyc07g054840.2 | SI2R-MYB076 | KNGLKKGPTWTPPEEDNKLIQYIQLHGPNGWRNLPKNAGLQRCGKSCRLRWNTYLRPDIKGRFSEDEETIIQLHSVLGNKWSAIAARLPGRTDNEIKNYWNTHIRKRL   |
| <i>Solanum lycopersicum</i> v2.3 | Solyc07g054960.1 | SI2R-MYB077 | KNGIKRGAWEDEDNKLRAFIQKFGHPNWRQLPKYAGLMRCGKSCRLRWNYLRPGLKKGNYSHHEEQIILKLNKLNWRWSEIAAKLPGRSDNDVKNHWHAHLKRRP      |
| <i>Solanum lycopersicum</i> v2.3 | Solyc07g054980.1 | SI2R-MYB078 | KNGRKKGTWTPPEEDKLEAYITKYGCWNWRQLPKYAGLARCGKSCRLRWNYLRPNVVRGNYTKEEDEIILNLHAQLGNRWSAIAIHLPGRSNDNEIKNHWHHTSLKKRA  |
| <i>Solanum lycopersicum</i> v2.3 | Solyc07g055000.1 | SI2R-MYB079 | ENGRKKGWTLLEEDKLLAAAYITKYGSWNWRQLPKYAGLARCGKSCRLRWNYLRPNVVRGNYTKEEDEIILNIHAQLGNKWSIAAHLPERSDNEIKNYWHTLKKRA     |
| <i>Solanum lycopersicum</i> v2.3 | Solyc08g005870.1 | SI2R-MYB080 | KEGLKKGWSTKEDLLLEIYIKEYGEGTGWRSPLPKAGLLRCGKSCRLRWNYLRPGLNRTFTPEEDDLVRLYTLGSRWSLIAGRIPGRTDNDIKNYWNTSLKKL        |
| <i>Solanum lycopersicum</i> v2.3 | Solyc08g008480.2 | SI2R-MYB081 | KEGLRKGWSTNEDLLLTNYIKENGEQWRNLPNKAGLLRCGKSCRLRWNYLRPGLKGRNFSQDEEDLIIRLHSLGNRWSLIAGRIPGRTDNEIKNYWNTLHVKKL       |
| <i>Solanum lycopersicum</i> v2.3 | Solyc08g065910.1 | SI2R-MYB082 | KSKVVRGQWSPPEEDELKNHIFNHGNGPSWIALPKRAGLNRCGKSCRLRWNYLRPNIKLGNFTQDEEDNTICSLYNQLGSRWSVIASKLPGRTDNEIKNHWNTHLKKK   |
| <i>Solanum lycopersicum</i> v2.3 | Solyc08g076700.1 | SI2R-MYB083 | DEDLKKGPWTSEEDKLEVEYIKENHGHWQLIPKAGLNRCGKSCRLRWNTYLRPDIKRGAFSEEEEEIILHSLGNKWSKIASHLPGRTDNEIKNLWNTLHKKL         |
| <i>Solanum lycopersicum</i> v2.3 | Solyc08g076710.2 | SI2R-MYB084 | DENLKKGPWTSEEDKLMYITKNGHTNWLIPKAGLNRCGKSCRLRWNTYLRPDIKRGAFSEEEEEIILHSLGNKWSKIASHLPGRTDNEIKNFYNTLHKKL           |
| <i>Solanum lycopersicum</i> v2.3 | Solyc08g079270.2 | SI2R-MYB085 | KLGVKKGPTWTAEDKLLINFILNQGCCWRAVPKLAGLRCGKSCRLRWNTYLRPDLKRGLLSEAEKLVIDLHARLGNRWSKIAARLPGRTDNEIKNHWNTHIKKLL      |
| <i>Solanum lycopersicum</i> v2.3 | Solyc08g081500.1 | SI2R-MYB086 | QQKVKRGLWSPPEDEKLIRYITSHYGCWSEVPEKAGLQRCGKSCRLRWNYLRPDIRRGRFTPEEKLIISLHGA VGNRWAHIASHLPGRTDNEIKNYWNSWIKKLL     |
| <i>Solanum lycopersicum</i> v2.3 | Solyc08g082890.2 | SI2R-MYB087 | KEGLRKGWSTKEDLLLTNYINQYGEQWRSLPKNAGLLRCGKSCRLRWNYLRPGLKGRNFSQDEEDLIIRLHSLGNRWSLIAGRIPGRTDNEIKNYWNTLHKKL        |
| <i>Solanum lycopersicum</i> v2.3 | Solyc09g008250.2 | SI2R-MYB088 | KANVKKGPWSPPEADKLEKIDKFGTGGNWIAPKAGLRCGKSCRLRWNYLRPNIKHGFSEDEEDRIICSLYANIGSRWSIAAQLPGRTDNDIKNYWNTLHKKL         |
| <i>Solanum lycopersicum</i> v2.3 | Solyc09g008390.1 | SI2R-MYB089 | EEKLRKGPWLDEEDERLAVIAILGERRWDALAKASGLRRSGKSCRLRWNYLRPNLKHGHITQDEEHLIILKQKQLGNKWSKIAKQLPGRTDNEIKNYWNSHLRKK      |
| <i>Solanum lycopersicum</i> v2.3 | Solyc09g010840.1 | SI2R-MYB090 | MRERQRWRAEEDALLRAYVRQYGPKEWHLVSQRMNTPLNRDAKSLERWKNYLRPKIKGSLTEDEQRLVIQLQAKHGNKWKIAAEVPGRTAKRLGKWWVEVFKKQQ      |
| <i>Solanum lycopersicum</i> v2.3 | Solyc09g011780.2 | SI2R-MYB091 | TADRVRKGPWSPPEADLRSVNFSGARNWSLIARGIPGRSGKSCRLRWNYLRPNLKHGHITQDEEHLIILKQKQLGNKWSKIAKQLPGRTDNEIKNYWNSHLRKK       |
| <i>Solanum lycopersicum</i> v2.3 | Solyc09g055650.1 | SI2R-MYB092 | VTMLVKGQWTEEDRILMMLVKQFGLKRWAIQENMVGGRAGQCRERWHNHLRDPDIKKTWSEEEEEVMLVEAHKQIGNKWAIEGKRIPGRTEIKNHWNTHIKKRL       |
| <i>Solanum lycopersicum</i> v2.3 | Solyc09g090130.2 | SI2R-MYB093 | KMGLKKGPTWTPPEEQILISYIQSNHGHWRALPKLAGLRCGKSCRLRWNTYLRPDIKGRNFTREEEDSIIQLHEMLGNRWSAIAARLPGRTDNEIKNVWNTLHKKL     |
| <i>Solanum lycopersicum</i> v2.3 | Solyc09g090790.2 | SI2R-MYB094 | EVGWRKGPWTSDEEDRLLIEYVKLHGEGRWNSVARLTGLRRNGKSCRLRWNYLRPDLKRGQITPHEERILELHNRWGNRWSIARSLPGRTDNEIKNYWNTLHKKL      |
| <i>Solanum lycopersicum</i> v2.3 | Solyc10g005240.2 | SI2R-MYB095 | KQKVKRGLWSPPEDEKLMRHISTQGHGCWSSVPRLAGLQRCGKSCRLRWNYLRPDLRRGFSFEQEERTIIDIRILGNRWAQIAKHLPGRTDNEVKNFWNSCIKKL      |
| <i>Solanum lycopersicum</i> v2.3 | Solyc10g005460.2 | SI2R-MYB096 | KNGLKKGPTWTEEDQKLIDYIQKYSGSNWRILPKNAGLQRCGKSCRLRWNYLRPDIKGRGKFSFEETIIHLSILGNKWSAIAARLPGRTDNEIKNYWNTNIRKLL      |
| <i>Solanum lycopersicum</i> v2.3 | Solyc10g005550.1 | SI2R-MYB097 | KSKVKKGPWTPSEDLKLSIFQKHGHGNWRALPKAGLRCGKSCRLRWNYLRPDLKRGNFTPEEEDTIINLHRAFGRNWSKIASHLPGRTDNEIKNVWNTLHKKL        |
| <i>Solanum lycopersicum</i> v2.3 | Solyc10g005760.1 | SI2R-MYB098 | KDNVVRGQWTPPEEDHLSSYIAQHGTNRWRLIPKAGLQRCGKSCRLRWNYLRPDLKHGQFSEAEQITVTLHSLGNRWSVIAAQLPGRTDNDVKNHWNTLKKKLL       |
| <i>Solanum lycopersicum</i> v2.3 | Solyc10g008700.1 | SI2R-MYB099 | KNGLKKGPTWTPPEEQKLIQYIQLHGPNGWRNLPKNAGLQRCGKSCRLRWNTYLRPDIRRGRFSEDEETIIQLHSVLGNKWSAIAARLPGRTDNEIKNYWNTHIRKRL   |
| <i>Solanum lycopersicum</i> v2.3 | Solyc10g019260.1 | SI2R-MYB100 | FDEIKKGSWKEEDEVILNHVVKYGPDRDSSIRSKGLLQRTGKSCRLRWNYLRPNLKNVGFSEERTVIELQGFQGNKWARIATYLSGRTDNDVKNFWSSRQKRLA       |
| <i>Solanum lycopersicum</i> v2.3 | Solyc10g044680.1 | SI2R-MYB101 | KKKLRKGLWCPPEDEKLLNHVTKYGHGCWSSVPKLALQRCGKSCRLRWNYLRPDLKRGTFQSQEENLIQLHSLGNKWSQIASRLPGRTDNEIKNLWNSIKKL         |
| <i>Solanum lycopersicum</i> v2.3 | Solyc10g055410.1 | SI2R-MYB102 | KAHTNKGAWTKEEDERLISYIRAHGEGCWRSPLKAAAGLLRCGKSCRLRWNYLRPDLKRGNFTTEEDELIIKLSLGNKWSLIAGRIPGRTDNEIKNYWNTHIRKRL     |
| <i>Solanum lycopersicum</i> v2.3 | Solyc10g081320.1 | SI2R-MYB103 | TKLCARGHWRPHEDAKLVELVQYGPQNWNLIAEKLEGRSGKSCRLRWNYLRPDLKRGNFTTEEDELIIKLSLGNKWSLIAGRIPGRTDNEIKNYWNTHIRKRL        |
| <i>Solanum lycopersicum</i> v2.3 | Solyc10g081490.1 | SI2R-MYB104 | KIGIKKGPWTPPEEIIIVSYIQEHGPGNWRVPTNTGLMRCGKSCRLRWNTYLRPDIKGRNFTPEEEMIIHLQALLGNKWSAIAASYPQRTDNDIKNYWNTLHKKL      |
| <i>Solanum lycopersicum</i> v2.3 | Solyc10g083900.1 | SI2R-MYB105 | EEELRRGQWLEEEDERLSMMVA VFGERRWDALAKTSGLRKSGKSCRLRWNYLRPNLKHGHITADEERLIIRLQKQFGNWSKIAKQLPGRTDNEIKNYWNSHLRKK     |
| <i>Solanum lycopersicum</i> v2.3 | Solyc10g086250.1 | SI2R-MYB106 | SLGVRKGSWTEQEDSLRDCIQKYGEGKWHLVPARAGLNRCRKSCLRWNYLRPHIKRGDFAPDEVLDLILRLHKLGNRWSLIAGRIPGRTDNDVKNYWNTLHKKL       |
| <i>Solanum lycopersicum</i> v2.3 | Solyc10g086260.1 | SI2R-MYB107 | SLGVRKGSWTEDEDFLLRKCIDKYGEGKWHLVPARAGLNRCRKSCLRWNYLRPHIKRGDFAPDEVLDLILRLHKLGNRWSLIAGRIPGRTDNDVKNYWNTLHKKL      |
| <i>Solanum lycopersicum</i> v2.3 | Solyc10g086270.1 | SI2R-MYB108 | SLGVRKGSWTEQEDLLRKCINKYGEGKWHLVPARAGLNRCRKSCLRWNYLRPHIKRGDFASDEIDLILRLHKLGNRWSLIAGRIPGRTDNDVKNYWNTLHKKL        |
| <i>Solanum lycopersicum</i> v2.3 | Solyc10g086290.1 | SI2R-MYB109 | TLGVRKGSWTEDEDLRKCIDKYGEGKWHLVPFRAGLNRCRKSCLRWNYLRPHIKRGDFALDEIDLILRLHKLGNRWSLIAGRIPGRTDNDVKNYWNTLHKKL         |
| <i>Solanum lycopersicum</i> v2.3 | Solyc11g011050.1 | SI2R-MYB110 | DKVGLKKGPTWTAEDKLLINFILNQGCCWRAVPKLAGLRCGKSCRLRWNTYLRPDLKRGLLSEYEEKMVIDLHAQLGNRWSKIASHLPGRTDNEIKNHWNTHIKKLL    |
| <i>Solanum lycopersicum</i> v2.3 | Solyc11g065840.1 | SI2R-MYB111 | NVKLKGLWSPPEDEKLMHYMLTNGQGCWSDVARNAGLQRCGKSCRLRWNYLRPDLKRGAFSPQEEHIIHLSILGNRWSQIAARLPGRTDNEIKNFWNSTLKKRL       |
| <i>Solanum lycopersicum</i> v2.3 | Solyc11g069030.1 | SI2R-MYB112 | KANVVRGQWSPPEADKLDIFHFKFTAGNWIAPKAGLRCGKSCRLRWNYLRPNIKHGHDFDDEEDRVICNLYANIGSRWSIAAQLPGRTDNDIKNYWNTLHKKL        |
| <i>Solanum lycopersicum</i> v2.3 | Solyc11g072060.1 | SI2R-MYB113 | GTPLKKGPTWKAEDAILRDYVAEYEGGNWSSVHRRGLARCGKSCRLRWNYLRPNLKPYPKGAFTQEEELIVAMHAQIGNKWARIASEFPGRTDNDIKNFWNTRIKRQR   |
| <i>Solanum lycopersicum</i> v2.3 | Solyc11g073120.1 | SI2R-MYB114 | EEIMRRGPWTEEDVQLLFYVKLFGDRRWDFLAKVSLKRTGKSCRLRWNYLRPNLKHGKMTPEERLVLHLSKGNRWSRIARKIPGRTDNEIKNYWNTLHKKL          |
| <i>Solanum lycopersicum</i> v2.3 | Solyc12g005640.1 | SI2R-MYB115 | KSGLKKGTWTEEDKLLAAVYVNYGCWNWRQLPKFAGLSRCGKSCRLRWNYLRPNIKRGNFTREEDQIIMKLHAEIGNKWSAIAIHLPGRSNDNEIKNHWHHTSLKKRS   |
| <i>Solanum lycopersicum</i> v2.3 | Solyc12g008670.1 | SI2R-MYB116 | KTKVVRGQWSPPEEDNLIKNYLEKNGTSGNWISLPKAGLRCGKSCRLRWNYLRPDIKRGDFTEEDNIILTYRQIGSRWSVIAANLGRTDNDVKNHWNTLHKKL        |
| <i>Solanum lycopersicum</i> v2.3 | Solyc12g049300.1 | SI2R-MYB117 | KEGLNKGAWTPLEDKILMDYIKVHGEKWRNLPKAGLRCGKSCRLRWNYLRPDIKRGNFTPEEEDLIIRLHKLGNRWSLIAGRIPGRTDNEIKNYWNTNIGRRL        |
| <i>Solanum lycopersicum</i> v2.3 | Solyc12g049350.1 | SI2R-MYB118 | KVGLKGRWTEEDERLTNYIQANGEGSWRTLPKNAGLRCGKSCRLRWNYLRPNLKHGHITQDEEHLIILKQKQLGNKWSKIAKQLPGRTDNEIKNYWNSHLRKK        |

|                                     |                    |             |                                                                                                                                                                       |
|-------------------------------------|--------------------|-------------|-----------------------------------------------------------------------------------------------------------------------------------------------------------------------|
| <i>Solanum lycopersicum</i> v2.3    | Solyc12g096200.1   | SI2R-MYB119 | KVGMKKGPWSIEEDMLLTSYIHLHGEHNWRSPLMNAAGLLRCSKSCRLRWVNYLRPGIKRGNFSPPEEDLLIPLYSLGGRWSLIAGRLSGRTDNEIKNHWHNTLLKKL                                                          |
| <i>Solanum lycopersicum</i> v2.3    | Solyc12g099120.1   | SI2R-MYB120 | IMELRRGPWTVEEDLVMNYSIHGEGRWNSLRCAGLKRTGKSCRLRWLNLYRPDVRHGNITLEEQLLILQLHSRWGNRWSKIAQHLPGRTDNEIKNYWRTRVQKHA                                                             |
| <i>Solanum lycopersicum</i> v2.3    | Solyc12g099130.1   | SI2R-MYB121 | IMELRRGPWTVEEDFILMNYISHGEGRWNSLRCAGLKRTGKSCRLRWLNLYRPNIRHGNITLEEQLLILQLHFRWGNRWSKIAEHLPGRTDNEIKNYWRTRVQKHA                                                            |
| <i>Solanum lycopersicum</i> v2.3    | Solyc12g099140.1   | SI2R-MYB122 | NLDLKRGSWTVEEDFTLMNHIALHGEGRWNSLARSAGLKRTGKSCRLRWLNLYRPDVRHGNITLEEQLLILQLHSRWGNRWSKIAQYLPGRDNEIKNYWRTRVQKQA                                                           |
| <i>Solanum lycopersicum</i> v2.3    | Solyc08g068320.2.1 | SI3R-MYB1   | TRRSTKQWTPPEEDTLCKAVQRFKGKNWKKIAECFKDRDQVQLHRWQKVLNPELVKGPWSKEEDEVIGELVKKYGPKKWSIAQHLPGRIGKQCRERWHNHLNPGINKEA                                                         |
| <i>Solanum lycopersicum</i> v2.3    | Solyc11g071300.1.1 | SI3R-MYB2   | WTQEEEMTLVHAHQIYGNKWAELTKFLPGRDINAIAKHNWSSVKKKL<br>GPKRRSSHWTPPEEDILRQAVQFQKGSWKKIAECFKDRSDVQCLHRWQKVLNPELVKGSWSKEEDDKLIGLVNIHGPKKWSIAQELAGRIGKQCRERWHNHLNPAIKKEAWT   |
| <i>Solanum lycopersicum</i> v2.3    | Solyc08g080580.2.1 | SI3R-MYB3   | QEEELTLRAHEAHGNKWAELSKYLPGRDINAIAKHNWSSVKKKL<br>GPTKRSSQAGWTEEDNLLTEVVERFKGRNWKRIAECLNGRTDQVQLHRWQKVLNPELVKGPWTKEEDDLIELVEKHGCKKWSIANSPLGRIGKQCRERWHNHLDPITTKDA       |
| <i>Solanum lycopersicum</i> v2.3    | Solyc09g010820.2.1 | SI3R-MYB4   | WTEQEEMLVCHYHQLYGNKWAIAKFLPGRDINAIAKHNWSSVKKKL<br>PIRRAKGGWTPPEEDTLKQAVSVYRKGKWCWKKIAEFPDRSEVQCLHRWQKVINPELVKGPWTREEDDKIELVAKYGPIKWSVIAKSLTGRIGKQCRERWHNHLNPNIKKDAWTL |
| <i>Vitis vinifera</i> Genoscope.12X | GSVIVT0101680001   | Vv2R-MYB001 | EEERALIDAHRIHGNKWAELAKVLPGRDINAIAKHNWSSVKKKL                                                                                                                          |
| <i>Vitis vinifera</i> Genoscope.12X | GSVIVT01000232001  | Vv2R-MYB002 | KQVKRGLWSPEEDEKLINYSYGHGCWSSVPRLAGLQRCGKSCRLRWVNYLRPDLKRGFSFQEAALIELHRLGNRWAQIAKHLPGRTDNEVKNFWNSSIKKKL                                                                |
| <i>Vitis vinifera</i> Genoscope.12X | GSVIVT01000449001  | Vv2R-MYB003 | KEHTNKGAWTKEEDQLIAIYIKTHGEGCWRSLPKAAGLLRCGKSCRLRWVNYLRPDLKRGNFDTDEEDELINLHSHFFGNKWSLIAGRLPGRTDNEIKNYWNTHTIKRKL                                                        |
| <i>Vitis vinifera</i> Genoscope.12X | GSVIVT01000450001  | Vv2R-MYB004 | KSGLKKGWTPEEDHKLVAIYTRYGCWNWRLLPKYAGLMRCGKSCRLRWVNYLRPNIKRGNYSKEEEDTIKHLHASLGNRWSAIAAQLPGRTDNEIKNYWNTHTLKKRL                                                          |
| <i>Vitis vinifera</i> Genoscope.12X | GSVIVT01000460001  | Vv2R-MYB005 | KYGRKKGAWSPPEDEKLRAYVQRYGHWNWRELPRFAGLSRCGKSCRLRWVNYLRPNVKGNYSAEETIKLHEELGNKWSAIAKLPGRDNEIKNYWNTHTLKKRE                                                               |
| <i>Vitis vinifera</i> Genoscope.12X | GSVIVT010003662001 | Vv2R-MYB006 | KNGLKKGWTPPEEDDKLSHYIQLHGPGNWRTPKNAQLQRCGKSCRLRWVNYLRPDKRGRFSFEEETIQLHSILGNKWSAIAARLPGRDNEIKNYWNTHTIRKRL                                                              |
| <i>Vitis vinifera</i> Genoscope.12X | GSVIVT01003675001  | Vv2R-MYB007 | KNGLKKGWTPPEEDQLIDYIQKNGYGNWRTLPKNAGLQRCGKSCRLRWVNYLRPDKRGRFSFEEETIQLHSILGNKWSAIAARLPGRDNEIKNYWNTHTIRKRL                                                              |
| <i>Vitis vinifera</i> Genoscope.12X | GSVIVT01003966001  | Vv2R-MYB008 | VSTLKKGSWSPEEDQLKAYIKRYGIWNWTEMPKAAGLSRSGKSCRLRWVNYLRPDKRGRFSFEEETIEMHKKLGNRWSAIAERLPGRDNEIKNYWNTHTLKKRL                                                              |
| <i>Vitis vinifera</i> Genoscope.12X | GSVIVT01004317001  | Vv2R-MYB009 | KVGLKRGWTPTEEDHKLMSFILNNGIQCWVMPKLAGLLRCGKSCRLRWVNYLRPDLKRGALSEVEENQIIQLHSRLGNRWSKIASHPGRDNEIKNHWNTRIKRKL                                                             |
| <i>Vitis vinifera</i> Genoscope.12X | GSVIVT01004464001  | Vv2R-MYB010 | KLGVKKGWTPTEEDDKLINFILNNGQCCWRAVPKLAGLRRCGKSCRLRWVNYLRPDLKRGGLTESEEQLVIDLHARLGNRWSKIAARLPGRDNEIKNHWNTHIKKKL                                                           |
| <i>Vitis vinifera</i> Genoscope.12X | GSVIVT01004851001  | Vv2R-MYB011 | KANVKKGPWSPEEDAKLKYIEKNGTGGNWIALPQKIGLKRCGKSCRLRWVNYLRPNIKHGGFSEEDNIICSLYISIGSRWSVIATQLPGRTDNDIKNYWNTHTLKKKL                                                          |
| <i>Vitis vinifera</i> Genoscope.12X | GSVIVT01006275001  | Vv2R-MYB012 | ESGLKKGWTPPEEDQLVKYIQKHGHSWRALPKLAGLNRCGKSCRLRWVNYLRPDKRGRKFSREEEETILNLSILGNKWSAIAASHLPGRDNEIKNFWNTHTLKKKL                                                            |
| <i>Vitis vinifera</i> Genoscope.12X | GSVIVT01007670001  | Vv2R-MYB013 | KKVMNKGAWTSEEDRKLAEYIEVHGAKRWKTVAFKSGLNRCGKSCRLRWVNYLRPNIKRGNISDDEEDLILRLHKLGNRWSLIAGRLPGRTDNEIKNYWNTHTLKKKL                                                          |
| <i>Vitis vinifera</i> Genoscope.12X | GSVIVT01007731001  | Vv2R-MYB014 | KQKLRKGLWSPEEDEKLNYITRFGVGCWSSVPKLAGLQRCGKSCRLRWVNYLRPDLKRGMFQSEEDIIISLHQLVGNRWAQIAAQLPGRTDNEIKNFWNTHTLKKKL                                                           |
| <i>Vitis vinifera</i> Genoscope.12X | GSVIVT01007740001  | Vv2R-MYB015 | KTHVVKGWTEEDRLLIQLVEQYGVKRWLSIAQMLNGRIGKQCRERWHNHLRPNIKKDIWSEEDKILIQAHAEIGNKWAELAKRLPGRTENSINKHNWNTHTLKKRL                                                            |
| <i>Vitis vinifera</i> Genoscope.12X | GSVIVT01007981001  | Vv2R-MYB016 | ANGYRKGLWTEEDRILMDYIRVHGKGNWRIAKVTGLKRCGKSCRLRWVNYLRPDLKRGDFQSEEDLILRLHLLGNRWSLIAGRVPGRTDNQVKNHWNTHTLKKKL                                                             |
| <i>Vitis vinifera</i> Genoscope.12X | GSVIVT01008005001  | Vv2R-MYB017 | TTSLKRGWTPTEEDRLLAYIQEHGHSWRVCPENAGLQRCGKSCRLRWVNYLRPDKRGRKFSLREEETIQLHALLGNRWSAIAATHLPNRTDNEIKNYWNTHTLKKRL                                                           |
| <i>Vitis vinifera</i> Genoscope.12X | GSVIVT01008090001  | Vv2R-MYB018 | KIGVKKGPWTPPEEDILVSYIQEHGPGNWRAVPTSTGLLRCSKSCRLRWVNYLRPDKRGNFTDQEEETIHLQALLGNRWAIAIAYLPQRTDNDIKNYWNTHTLKKKL                                                           |
| <i>Vitis vinifera</i> Genoscope.12X | GSVIVT01008303001  | Vv2R-MYB019 | KLNVKRWLTAEDAKILAHVSKHGTGNWTAVPKAGLRRCGKSCRLRWVNYLRPDLKHESFTPEEELIVRLHATIGSRWSIAAQLPGRTDNDVKNYWNTHTLKKKL                                                              |
| <i>Vitis vinifera</i> Genoscope.12X | GSVIVT01008401001  | Vv2R-MYB020 | DAELRRGPWTEEDTLIHYIASHGEGRWNLAKCSGLRRTGKSCRLRWVNYLRPDKRGNLTPQEQLLILELHSGWGNRWSKIAQHLPGRTDNEIKNYWRTRVQKQA                                                              |
| <i>Vitis vinifera</i> Genoscope.12X | GSVIVT01008402001  | Vv2R-MYB021 | KKFTNKGAWSKQEDQLIDYIQKHGEGCWSSLPQSAGLLRCGKSCRLRWVNYLRPDKRGNFGEDEEDLIKHLALLGNRWSLIAGRLPGRTDNEVKNYWNTHTLKKKL                                                            |
| <i>Vitis vinifera</i> Genoscope.12X | GSVIVT01008484001  | Vv2R-MYB022 | KKDTNKGAWSKQEDQLIDYIQKHGEGSWRSLPQAAGLLRCGKSCRLRWVNYLRPDLKRGNAEEDLIVKLHALLGNRWSLIAGRLPGRTDNEVKNYWNTHTLKKRL                                                             |
| <i>Vitis vinifera</i> Genoscope.12X | GSVIVT01009032001  | Vv2R-MYB023 | MCTRGHWRPAEDEKRELVERHGHFNWNAIAEKLPRSGKSCRLRWVNYLRPDLKRGNAEEDLIVKLHALLGNRWSLIAGRLPGRTDNEVKNYWNTHTLKKRL                                                                 |
| <i>Vitis vinifera</i> Genoscope.12X | GSVIVT01009280001  | Vv2R-MYB024 | ENGLKKGWTPPEEDQLVSYVQKHGHSWRALPKLAGLNRCGKSCRLRWVNYLRPDKRGRKFSQEEETIHLHLSILGNKWSAIAASHLPGRDNEIKNFWNTHTLKKKL                                                            |
| <i>Vitis vinifera</i> Genoscope.12X | GSVIVT01009424001  | Vv2R-MYB025 | KANVKKGPWSPEEDAKLSYIEQHGTGGNWIALPQKIGLKRCGKSCRLRWVNYLRPNIRHGGFSEEDNIICSLYISIGSRWSVIAAQLPGRTDNDIKNYWNTHTLKKKL                                                          |
| <i>Vitis vinifera</i> Genoscope.12X | GSVIVT01010006001  | Vv2R-MYB026 | DLDRKGPWSPEEDALQRLVQKHGPRNWSLISKIPGRSGKSCRLRWVNYLRPDKRGNLTPQEQLLILELHSGWGNRWSKIAQHLPGRTDNDVKNYWNTHTLKKKL                                                              |
| <i>Vitis vinifera</i> Genoscope.12X | GSVIVT01010086001  | Vv2R-MYB027 | AKTCPRGHWRPAEDEKRLQVVEEYGAQNWSIAEKLQGRSGKSCRLRWVNYLRPDKRGNLTPQEQLLILELHSGWGNRWSKIAQHLPGRTDNDVKNYWNTHTLKKKL                                                            |
| <i>Vitis vinifera</i> Genoscope.12X | GSVIVT01011417001  | Vv2R-MYB028 | KQVKRGLWSPEEDEKLIRYITNTHGHCWSSVPKLAGLQRCGKSCRLRWVNYLRPDLKRGFSFAQEERTIIDVHRIVGNKWAQIAKYLPGRTDNEVKNFWNSCIKKKL                                                           |
| <i>Vitis vinifera</i> Genoscope.12X | GSVIVT01011436001  | Vv2R-MYB029 | KIGVKKGPWTPPEEDILVSYIQEHGPGNWRAVPTNTGLLRCSKSCRLRWVNYLRPDKRGNFTDHEERMIIHLQALLGNRWAIAIAYLPQRTDNDIKNYWNTHTLKKKL                                                          |
| <i>Vitis vinifera</i> Genoscope.12X | GSVIVT01011447001  | Vv2R-MYB030 | SKLCARGHWRPAEDSKLRELVALYGPQNWNLIAEKLEGRSGKSCRLRWVNYLRPDKRGNFTDHEERMIIHLQALLGNRWAIAIAYLPQRTDNDIKNYWNTHTLKKKL                                                           |
| <i>Vitis vinifera</i> Genoscope.12X | GSVIVT01011768001  | Vv2R-MYB031 | KVGLKKGWTPPEEDQLLAYIEEHGHSWRALPSKAGLQRCGKSCRLRWVNYLRPDKRGRKFSLQEEETIHLHALLGNRWSAIAATHLPKRTDNEIKNYWNTHTLKKRL                                                           |
| <i>Vitis vinifera</i> Genoscope.12X | GSVIVT01011872001  | Vv2R-MYB032 | KQDTNKGAWSKQEDQLIDYIRKNGEGCWRTLPQAAGLLRCGKSCRLRWVNYLRPDLKRGNAEEDLIVKLHALLGNRWSLIAGRLPGRTDNEVKNYWNTHTLRRKL                                                             |
| <i>Vitis vinifera</i> Genoscope.12X | GSVIVT01012149001  | Vv2R-MYB033 | EIELRRGPWTEEDTLIHYIACHGEGRWNLAKCAGLKRTGKSCRLRWVNYLRPDKRGNLTPQEQLLILELHSGWGNRWSRIAQHLPGRTDNEIKNYWRTRVQKQA                                                              |
| <i>Vitis vinifera</i> Genoscope.12X | GSVIVT01012150001  | Vv2R-MYB034 | MGCPTALRKGWTEEDSLLRKYVKEFGEENWKHIAAKSGLRRCRCSKSCRLRWVNYLRPNIKRGNFGAEDDLIMRLHRLGNRWSMIAGRIPGRTPNEIKNYWNTHTLKKKI                                                        |
| <i>Vitis vinifera</i> Genoscope.12X | GSVIVT01012447001  | Vv2R-MYB035 | NTALRKGWTEEDRLLREYVDKYQGQGNWKHITSKTGLRRCRCSKSCRLRWVNYLRPDKRGSFGVDEEDLILRLHRLGNRWSLIAGRIPGRTPNEIKNYWNTHTLKKKI                                                          |
| <i>Vitis vinifera</i> Genoscope.12X | GSVIVT0101277001   | Vv2R-MYB036 | GIVLKKGPWTSSEEDAILVEYVKKHGEENWNAVQKHSGLFRGKSCRLRWANHLRPNLKKGAFTAEEERLIELHAKMGNKWARMAAHLPGRTDNEIKNYWNTHTLRRRQ                                                          |
| <i>Vitis vinifera</i> Genoscope.12X | GSVIVT0101277001   | Vv2R-MYB036 | KAHTNRGAWTKEEDRLIEYIRMNHGHGSWRSLPKAAGLLRCGKSCRLRWVNYLRPDKRGNFTIDEDELIKHLKLLGNKWSLIAGRLPGRTDNEIKNHWNTHIRRL                                                             |

|                                     |                   |             |                                                                                                                                                                                                                                               |
|-------------------------------------|-------------------|-------------|-----------------------------------------------------------------------------------------------------------------------------------------------------------------------------------------------------------------------------------------------|
| <i>Vitis vinifera</i> Genoscope.12X | GSVIVT01012778001 | Vv2R-MYB037 | KAHTNRGSWSKEEDDRLIHYIRLNGHGFWRSLPKAAGLLRCGKSCRLRWINYLRPDVKRGNFAIDEDELIHLKLLGNKWSLIAGRLPGRTDNEIKNHWNTHIRRKL                                                                                                                                    |
| <i>Vitis vinifera</i> Genoscope.12X | GSVIVT01013126001 | Vv2R-MYB038 | DGSLKKGPTWPEEDQKLVYIKRHGHGSRWALPKLAGLNRGKSCRLRWNTYLRPDIKRGKFSDEEERIIHLHSLVGNKWSIAIATLHPGRTDNEIKNFWNTLHKKKL                                                                                                                                    |
| <i>Vitis vinifera</i> Genoscope.12X | GSVIVT01013735001 | Vv2R-MYB039 | EDNYKKGLWTKEEDRILLDYIQVHGRGRWNRISKITGLKRYGKSCRLRWNYLSPSVKHGEFTEQEEDLIIRLHNLGNRWSLIAGRVGRTDNQVKNHWNSHLCKRKL                                                                                                                                    |
| <i>Vitis vinifera</i> Genoscope.12X | GSVIVT01014454001 | Vv2R-MYB040 | KNGMKGPTWVEEDQKLLDYIQKHGHGRWRTLPKNAGLKRCGKSCRLRWNTYLRPDIKRGFRSFEDEEAIHQHGLGNKWSIAIARLPGRTDNEIKNYWNTIRKRL                                                                                                                                      |
| <i>Vitis vinifera</i> Genoscope.12X | GSVIVT01014770001 | Vv2R-MYB041 | KDNVKGQWTPPEEDNKLSSYIAQHGTNRWRLPKNAGLQRCGKSCRLRWNTYLRPDLKHGQFSDAEEQTVKLHVSVGNRWSLIAAQLPGRTDNDVKNHWNTLKKKLL                                                                                                                                    |
| <i>Vitis vinifera</i> Genoscope.12X | GSVIVT01015100001 | Vv2R-MYB042 | KEGLNRGAWTVVEDKILTEYIKVHGEGRWRNLPKAGLKRCGKSCRLRWNTYLRPDIKRGFNISHDEEDLIVRLHKLGNRWSLIAGRLPGRTDNEIKNYWNTNLVKKM                                                                                                                                   |
| <i>Vitis vinifera</i> Genoscope.12X | GSVIVT01015101001 | Vv2R-MYB043 | KEGLNRGTWSALEDKILCNYIEIYGEGKWKEVPPRAGLKRCGKSCRLRWNTYLRPDIKRGFNISEDEEELIHLHKLGNRWSLIAGRLPGRTDNEIKNYWNTNLKLL                                                                                                                                    |
| <i>Vitis vinifera</i> Genoscope.12X | GSVIVT01015102001 | Vv2R-MYB044 | KEGLNRGSWSAWEDKILCNYVEVHGEKWRDLRQAGLKRCGKSCRLRWNTYLRPDIKRGFNISSEEEELIIRLHKLGNRWSLIAGRLPGRTDNEIKNYWNTNLKSKRL                                                                                                                                   |
| <i>Vitis vinifera</i> Genoscope.12X | GSVIVT01015264001 | Vv2R-MYB045 | KANVKGPTWSPPEEDNILRAFVEAHGTGGNWIAPRKAAGLKRCGKSCRLRWNTYLRPDIKHGGFTEDEENIIVTLNNGSRWSVIAASHLPRTDNDVKNYWNTLKKKLL                                                                                                                                  |
| <i>Vitis vinifera</i> Genoscope.12X | GSVIVT01015575001 | Vv2R-MYB046 | KPSVKKGLWKPEEDLLKYYEVAHGEKWAIVSERSGLKRGKSCRLRWNTYLRPNIKRGEISKEEEDLIIRMHKLLGNRWSLIAGRLPGRTDNEVKNYWNTLHKNKR                                                                                                                                     |
| <i>Vitis vinifera</i> Genoscope.12X | GSVIVT01015578001 | Vv2R-MYB047 | KPRVKKGLWKPEEDLLKYYEVAHGEKWDIVSERTGLMRSGKSCRLRWNTYLRPNKRGKSGKDEEEDIIIRMHKLLGNRWSLIAGRLPGRTDNDVKNYWNTLHKNKR                                                                                                                                    |
| <i>Vitis vinifera</i> Genoscope.12X | GSVIVT01016393001 | Vv2R-MYB048 | SSSRVRGPWSPEEDAILSQLVSKFGPRNWSLIARGISGRSGKSCRLRWNTYLRPDKRPFTEEDRIIIAAHSHHGKWKWASIAARLLPGRTDNAIKNHWNTLKRQC                                                                                                                                     |
| <i>Vitis vinifera</i> Genoscope.12X | GSVIVT01016765001 | Vv2R-MYB049 | RKEMNRGAWTAEDDRKLAIEVIEVHGAKRWKMIATAGLNRGKSCRLRWNTYLRPNIKRGNISDQEEEDLIRLHKLGNRWSLIAGRLPGRTDNEIKNYWNTLHKKKI                                                                                                                                    |
| <i>Vitis vinifera</i> Genoscope.12X | GSVIVT01016767001 | Vv2R-MYB050 | KEGLNRGAWTATEDKILTEYIKVHGEKWRNLPKAGLKRCGKSCRLRWNTYLRPDIKRGFNITHDEEELIIRLHKLGNRWSLIAGRLPGRTDNEIKNYWNTNLKSKRL                                                                                                                                   |
| <i>Vitis vinifera</i> Genoscope.12X | GSVIVT01016768001 | Vv2R-MYB051 | DVGLIRGAWSMQEDEVLYIRVHGEGNWKSALQKSLKRCGKSCRLRWNTYLRPGLKRGFSFDEEELIIRLHKLGNRWALIAAGRLPGRTDNEIKNYWNTLCKRL                                                                                                                                       |
| <i>Vitis vinifera</i> Genoscope.12X | GSVIVT01017716001 | Vv2R-MYB052 | KQKLRGLWSPEEDEKLFYITEHGHGCWSSVPKQAGLQRCGKSCRLRWNTYLRPDLKRGAFGTQEEKLIVELHEILGNRWSQIASHLPGRTDNEIKNQWNTLHKKKL                                                                                                                                    |
| <i>Vitis vinifera</i> Genoscope.12X | GSVIVT01018234001 | Vv2R-MYB053 | REEIKKGPWKAEEDEVLIHVNYKYPDRDSSIRSKGLLQRTGKSCRLRWNTYLRPNLKNCKFSSEEEERLIELQAQFGNKWARIATYLPGRTDNDVKNFSSRQKRLA                                                                                                                                    |
| <i>Vitis vinifera</i> Genoscope.12X | GSVIVT01018577001 | Vv2R-MYB054 | KLGVKKGPWTAEDDKLVTFILNTHGCCWRALPKLAGLRRGKSCRLRWNTYLRPDLKRGLLNEAEEQLVIDLHARLGNRWSKIAAKLPGRTDNEIKNHWNTLHKKKL                                                                                                                                    |
| <i>Vitis vinifera</i> Genoscope.12X | GSVIVT01018745001 | Vv2R-MYB055 | KAHTNKGAWTKEEDDRLIAHIAHGEHCWRSPLKAAGLLRCGKSCRLRWINYLRPDLKRGNFTEDEEELIHLHSLGNKWSLIAGRLPGRTDNEIKNYWNTHIRRKL                                                                                                                                     |
| <i>Vitis vinifera</i> Genoscope.12X | GSVIVT01019410001 | Vv2R-MYB056 | QQVKRGLWSPEEDEKLIRYITTYGYGCWSEVPEKAGLQRCGKSCRLRWNTYLRPDIRRGRFTPEEELIIRLHGVGNRWAHIAASHLPGRTDNEIKNYWNTLHKKKI                                                                                                                                    |
| <i>Vitis vinifera</i> Genoscope.12X | GSVIVT01019945001 | Vv2R-MYB057 | KVGLKKGWTPPEEDQKLMYSIEEHGHGSRWALPAKAGLQRCGKSCRLRWNTYLRPDIKRGKFSLQEEQTIQLHALLGNRWSIAIATLHPKRTDNEIKNYWNTLHKKRL                                                                                                                                  |
| <i>Vitis vinifera</i> Genoscope.12X | GSVIVT01019967001 | Vv2R-MYB058 | SKLCARGHWRPAEDTKLKVVALYGPQNWNLIAEKLEGRSGKSCRLRWNTYLRPDIRRRAFSEEEERLMDAHLRYGNKWAMIARLFPGRTDNAVKNHWHVIMARKY                                                                                                                                     |
| <i>Vitis vinifera</i> Genoscope.12X | GSVIVT01020038001 | Vv2R-MYB059 | QKERHIVTWSQEDDILREQLSHGTENWAIASKFKDKTTRQRRRWYTYLNSDFKKGGSPEEDLILCEAQKIFGNRWTEIAKVVSGRTDNAVKNRSTLCKKRA                                                                                                                                         |
| <i>Vitis vinifera</i> Genoscope.12X | GSVIVT01022654001 | Vv2R-MYB060 | MESLGVKGAWSQKEDAPLRKCKVEKYGEGKRHLVPIAGLNRCKKSCRLRWNTYLRPNIKRGEFALDEVLDLIRLHNLGNRWSLIAGRLPGRTDNDVKNYWHHTHFKKK                                                                                                                                  |
| <i>Vitis vinifera</i> Genoscope.12X | GSVIVT01022656001 | Vv2R-MYB061 | MKSLGVRKGAWTQEEEDVLLRCKIEKYGEGKWHLVPRLAGLNRCKKSCRLRWNTYLRPDIKRGFALDEVLDLIRLHNLGNRWSLIAGRLPGRTDNDVKNYWHGHHLKLL                                                                                                                                 |
| <i>Vitis vinifera</i> Genoscope.12X | GSVIVT01022657001 | Vv2R-MYB062 | MESLGVKKGWTTREEDFLRCKVEKYGEEKWHLVPRLAGLSRCKKSCRLRWNTYLRPNIKRKGKFAFASDEVLDLIRLHKLGNRWSLIAGRLPGRTDNDVKNYWHHHRFKKM                                                                                                                               |
| <i>Vitis vinifera</i> Genoscope.12X | GSVIVT01022659001 | Vv2R-MYB063 | MESLGVKKGAWTQEEEDVLLRCKIEKYGEGKWHLVPRLAGLNRCKKSCRLRWNTYLRPDIKRGFALDEVLDLIRLHNLGNRWSLIAGRLPGRTDNDVKNYWHSHHFKKE                                                                                                                                 |
| <i>Vitis vinifera</i> Genoscope.12X | GSVIVT01022661001 | Vv2R-MYB064 | MESLGVTKGWTTREEDILLRCKVENYGEKWHLVPRLAGLSRCKKSCRLRWNTYLRPNIKRKGKFAFASDEVLDLIRLHKLGNRWSLIAGRLPGRTDNDVKNYWHHHRFKKM                                                                                                                               |
| <i>Vitis vinifera</i> Genoscope.12X | GSVIVT01022664001 | Vv2R-MYB065 | MESLGVKKGAWTQEEEDVLLRCKIEKYGEGKWHLVPRLAGLNRCKKSCRLRWNTYLRPDIKRGFALDEVLDLIRLHNLGNRWSLIAGRLPGRTDNDVKNYWHGHHLKLL                                                                                                                                 |
| <i>Vitis vinifera</i> Genoscope.12X | GSVIVT01023527001 | Vv2R-MYB066 | RIMIKGGVWKNTEDEILKAAVMKYGKNQWARISLLVRKSAKQCKARWYEWLDPISIKTEWTTREDEKLLHLAKLMPQWRTIAPVGRTPQCLERYEKLLDAAC<br>SMGLKKGWTPPEEDQILVSHIQRHGHGNWALPKAAGLNRGKSCRLRWNTYLRPDIKRGKFSFEDEEIIHLHQLGNRRVLFQFHYMNTDIIILNSVKKTKLLWSAIAARLP<br>RTDNEIKNFWNSHLKLL |
| <i>Vitis vinifera</i> Genoscope.12X | GSVIVT01023531001 | Vv2R-MYB067 |                                                                                                                                                                                                                                               |
| <i>Vitis vinifera</i> Genoscope.12X | GSVIVT01024036001 | Vv2R-MYB068 | KAHTNKGAWTKEEDDRLIAHYIRAHGEHCWRSPLKAAGLLRCGKSCRLRWINYLRPDLKRGNFTEEDELIIHLHSLGNKWSLIAGRLPGRTDNEIKNYWNTHIRRKL                                                                                                                                   |
| <i>Vitis vinifera</i> Genoscope.12X | GSVIVT01024353001 | Vv2R-MYB069 | ESGLKKGPTWPEEDQKLVYIQRHGHGSRWALPKLAGLNRGKSCRLRWNTYLRPDIKRGKFSDEEENTIIHLHSLVGNKWSIAIATLHPGRTDNEIKNFWNTLHKKKL                                                                                                                                   |
| <i>Vitis vinifera</i> Genoscope.12X | GSVIVT01024357001 | Vv2R-MYB070 | RNGLKKGPTWPKEDQKLRIMYKRHGEPTWTEVPLARLNRGKSCRLRWNTYLRPDIKRGKFSQDEEDTIIRLQSAHGNTWVFIATQLPGRTDSEIKNYWNTSLKLL                                                                                                                                     |
| <i>Vitis vinifera</i> Genoscope.12X | GSVIVT0102477400  | Vv2R-MYB071 | SATLIKQWSAEEDRQLRLVNEFGEKKWAQIAKLGGRAGKQCRERWHNHLRDIRKDEWDEEEERILIEWHKKVGNKWAEIAKRITGRTEIKNHFNATKRRQD                                                                                                                                         |
| <i>Vitis vinifera</i> Genoscope.12X | GSVIVT01025269001 | Vv2R-MYB072 | GSKLRKGLWSPEEDDKLMNYMLNNGQGCWSDVARNAGLQRCGKSCRLRWNTYLRPDLKRGAFSPQEEELIHLHSLGNRWSQIAARLPGRTDNEIKNFWNTLHKKKL                                                                                                                                    |
| <i>Vitis vinifera</i> Genoscope.12X | GSVIVT01025452001 | Vv2R-MYB073 | KVGLKRGPTWPEEDEVLANIYKKEGEGWRWTLPKRAGLRCGKSCRLRWNTYLRPDRRSPVSRGQIAPDEEDLILRHLGNRWALIAGRIPGRTDNEIKNYWNTLHKKKL                                                                                                                                  |
| <i>Vitis vinifera</i> Genoscope.12X | GSVIVT01026481001 | Vv2R-MYB074 | GRNCQRGHWRPAEDEKLRQLVDQYPHNWNISADKLEGRSGKSCRLRWNTYLRPDIRRKPFTTEEEERLLAAHRIHGNKWSLIARLFPGRTDNAVKNHYHVIMARRH                                                                                                                                    |
| <i>Vitis vinifera</i> Genoscope.12X | GSVIVT01026868001 | Vv2R-MYB075 | KRGLKKGPTWPEEDQILVDYINKNGHGSWRSPLKAGLRCGKSCRLRWNTYLRPDIKRGFPFTTDEEKLVIQLHGILGNRWAAIASQLPGRTDNEIKNLWNTLHKKRL                                                                                                                                   |
| <i>Vitis vinifera</i> Genoscope.12X | GSVIVT01027182001 | Vv2R-MYB076 | KVGLHRGSWTAREDTLLTKYIQAHEGHWRSPLKAGLRCGKSCRLRWNTYLRPDIKRGNTPDDEDLIIRLHSLGNRWSLIAGRLPGRTDNEIKNYWNTLHKKKL                                                                                                                                       |
| <i>Vitis vinifera</i> Genoscope.12X | GSVIVT01027810001 | Vv2R-MYB077 | KMGLKKGPTWPEEDKILVAHVQKHGHGNWALPKQAGLRCGKSCRLRWNTYLRPDIKRGKFSFEDEEAIIDLHEKLGNRWSAIAARLPGRTDNEIKNFWNTLHKKKL                                                                                                                                    |
| <i>Vitis vinifera</i> Genoscope.12X | GSVIVT01027811001 | Vv2R-MYB078 | KVGLKKGPTWTTQEDQILTAYVLQHGHNWALPKQAGLRCGKSCRLRWNTYLRPDIKRGKFSFEDEEETIHLHEKLGNRWSAIAASLPGRTDNEIKNFWNTLHKKKL                                                                                                                                    |
| <i>Vitis vinifera</i> Genoscope.12X | GSVIVT01027949001 | Vv2R-MYB079 | EEGWRKGPWTAEDDRLLTEYVKLHGEGRWNSVARLAGLRRNGKSCRLRWNTYLRPDLKRGQITPHEENIILHARWGNRWSTIARSLPGRTDNEIKNYWRTHFKKKG                                                                                                                                    |
| <i>Vitis vinifera</i> Genoscope.12X | GSVIVT01028091001 | Vv2R-MYB080 | KVGLKKGRTWAEEDVLVYIQANGEGSWRSPLKAGLRCGKSCRLRWNTYLRADLKRGKFSFEDEEIIHLHASLGNRWSMIAGQLPGRTDNEIKNYWNTLHKKKL                                                                                                                                       |

|                                     |                   |             |                                                                                                              |
|-------------------------------------|-------------------|-------------|--------------------------------------------------------------------------------------------------------------|
| <i>Vitis vinifera</i> Genoscope.12X | GSVIVT01028171001 | Vv2R-MYB081 | NMDLRKGPWTAEDTLLNNYTIHGEGRWNSLARCAGLKRGTGKSCRLRWLNLYRPNVKGNTLQEQLLILELHSRYGNRWSKIAQHLPGRTDNEIKNYWRTRVQKQA    |
| <i>Vitis vinifera</i> Genoscope.12X | GSVIVT01028235001 | Vv2R-MYB082 | KQKLRKGLWSPEEDEKLLRHITKYGHGCWSSVPKQAGLQRCGKSCRLRWYNLYRDLKRGFTSLQEENLIELHSLVGNRWSQIAAQLPGRTDNEIKNLWNSCLKKKL   |
| <i>Vitis vinifera</i> Genoscope.12X | GSVIVT01028328001 | Vv2R-MYB083 | KMGLKKGWPTPEEDQILVNYIHLGHGNWRALPKQAGLLRCGKSCRLRWYNLYRDLKRGFTSLEEEETIIEHERLGNRWSAIAAKLPGRTDNEIKNVWHTHLKRL     |
| <i>Vitis vinifera</i> Genoscope.12X | GSVIVT01028981001 | Vv2R-MYB084 | KHGVKRGAWTPEEDEILIDYIKKNGHGRWRSPLKHAGLLRCGKSCRLRWYNLYRDLKRGFTPEEETAIQLHSMGLGNRWAAIASKIPGRTDNEIKNFWNTHLKKRL   |
| <i>Vitis vinifera</i> Genoscope.12X | GSVIVT01028984001 | Vv2R-MYB085 | KPKHRKGLWSPEEDARLRYVLYKYLGCWSSVPVNAQLQRNGKSCRLRWYNLYRDLKRGFTPEEETIIEHERLGNRWSQIAQNFPRGRTDNEIKNYWHSCLKKKV     |
| <i>Vitis vinifera</i> Genoscope.12X | GSVIVT01029145001 | Vv2R-MYB086 | KANVKKGPWSPEEDAKLKYIEQYGTGGNWIALPQKIGRLKRCGKSCRLRWLNLYRPNIKHGGFSEEDSIICNLYSISGRWSVIAAQLPGRTDNDIKNYWNTLKKKL   |
| <i>Vitis vinifera</i> Genoscope.12X | GSVIVT01029904001 | Vv2R-MYB087 | KVGIKGPWTPPEEIIIVSYIQEHGPGNWRVPTNTGLLRCSKSCRLRWYNLYRDLKRGFTPEEEMIIHLQALLGNKWAASIALPQRDTNDIKNYWNTLKKKI        |
| <i>Vitis vinifera</i> Genoscope.12X | GSVIVT01029941001 | Vv2R-MYB088 | NKVCVRGHWPHEDAKLREAVAQHGPQNWNLIAEKLVGRSGKSCRLRWYNLYRDLKRGFTPEEEDRLLAAHRLYGNKWAMIARAFPRGRTDNAVKNHWHVIMARRH    |
| <i>Vitis vinifera</i> Genoscope.12X | GSVIVT01030434001 | Vv2R-MYB089 | NQGLKKGWPTAEDAVALVEYVKRHGEGNWNVSQKNSGLSRCGKSCRLRWANHLRPNLKKGAFSPPEEERLIVELHAKLGNKWARMAAQLPGRTDNEIKNYWNTLKKRL |
| <i>Vitis vinifera</i> Genoscope.12X | GSVIVT01030708001 | Vv2R-MYB090 | KVGLKKGWPTAEDDKLINFILNNGQCCWRAVPLKAGLLRCGKSCRLRWYNLYRDLKRGFTSDFEEMVIDLHAQLGNRWSKIASHLPGRTDNEIKNHWNTHIKKKL    |
| <i>Vitis vinifera</i> Genoscope.12X | GSVIVT01030819001 | Vv2R-MYB091 | MEGSLGRKGAWTSEEDHLRCKVEKYGEGKWHQVFRAGLNRCRCSKSCRLRWYNLYRDLKRGFTADEVDLMMRLHKLGNRWALIAGRPLGRTSNDVKNYWNTLKKKM   |
| <i>Vitis vinifera</i> Genoscope.12X | GSVIVT01030822001 | Vv2R-MYB092 | MDGPGVVRKGAWTREEDVLLRTECKYEGEKWHQVFRSGLNRCRCSKSCRLRWYNLYRDLKRGFTDEVDLIRLHKLGNRWALIAGRPLGRTSNDVKNYWNTLKKKF    |
| <i>Vitis vinifera</i> Genoscope.12X | GSVIVT01030866001 | Vv2R-MYB093 | KKDTTKGAWSKQEDQLIDYIKTHGEGCWRSLPKAAGLHRCGKSCRLRWYNLYRDLKRGFTDEEDLIKLHALLGNRWSLIAGRLPGRTDNEIKNYWNSHIRKKL      |
| <i>Vitis vinifera</i> Genoscope.12X | GSVIVT01031341001 | Vv2R-MYB094 | KQKLRKGLWSPEEDEKLLMHITKYGHGCWSSVPKLAGLQRCGKSCRLRWYNLYRDLKRGAFSQEESLIIELHVLGNRWSQIAAQLPGRTDNEIKNLWNSCIKKKL    |
| <i>Vitis vinifera</i> Genoscope.12X | GSVIVT01031496001 | Vv2R-MYB095 | KANVKKGPWSPEEDSKLKAIEKYGTGGNWIALPQKAGLRCGKSCRLRWLNLYRPNIKHGFSDDEDRICTLFANMGRWSVIATRLPGRTDNDIKNYWNTLKKKV      |
| <i>Vitis vinifera</i> Genoscope.12X | GSVIVT01032088001 | Vv2R-MYB096 | MSYMLRNGQGCWSDIARNAGLQRCGKSCRLRWYNLYRDLKRGAFSPQEEELIHLHSLGNRWSQIAARLPGRTDNEIKNFWNSTIKKRL                     |
| <i>Vitis vinifera</i> Genoscope.12X | GSVIVT01032442001 | Vv2R-MYB097 | KLNVVKGQWTPQEDCLLIQMVLYNIEKKWSEIAKHLNVRGKQCRERWHNHLRPNIKDPWTEEDRILIAHIEIGNRWAIEISKRLPGRTEIKNHWNATKRRHL       |
| <i>Vitis vinifera</i> Genoscope.12X | GSVIVT01032452001 | Vv2R-MYB098 | DAEVRKGPWTEEDLILINIANHGEVWVNSLAKSAGLKRGTGKSCRLRWLNLYRDLKRGFTDEEQQLIMELHAKWGNRWSKIAKHLPGRTDNEIKNFWRTRIQKHI    |
| <i>Vitis vinifera</i> Genoscope.12X | GSVIVT01032467001 | Vv2R-MYB099 | MEEVNQYKKGWLTLEEDKILMDYVKEHGKQWNRNRIAKKTGLRRCGKSCRLRWYNLYRDLKRGFTDEEDLIRLHKLGNRWSLIAGRVPGRTDNQVKNYWNTLKKKL   |
| <i>Vitis vinifera</i> Genoscope.12X | GSVIVT01032564001 | Vv2R-MYB100 | KLNVKRWLTAEDAKILAYVSKHGIGNWTLVPKAGLNRCGKSCRLRWYNLYRDLKRGFTPEEDLIVNLHKAIGSRWSLIAKELPGRTDNDVKNYWNTLKKKL        |
| <i>Vitis vinifera</i> Genoscope.12X | GSVIVT01033418001 | Vv2R-MYB101 | KVGLKRGWTPPEEDELANYVKEGEGRWRTLPKAGLLRCGKSCRLRWYNLYRDLKRGFTPEEEDLIRLHKLGNRWSLIAGRIPGRTDNEIKNYWNTLKKKL         |
| <i>Vitis vinifera</i> Genoscope.12X | GSVIVT01033648001 | Vv2R-MYB102 | KANVKKGPWSPEEDSKLKEYIEKYGTGGNWIALPQKAGLRCGKSCRLRWLNLYRPNIKHGFSDDEDRICSVFASIGSKWSVIANLYPGRTDNDIKNYWNTLKKKL    |
| <i>Vitis vinifera</i> Genoscope.12X | GSVIVT01033670001 | Vv2R-MYB103 | GENLRKGSWLEEEERLTAFFVGLLGERRWDIARASGLKRSKSCRLRWYNLYRDLKRCQISAEQIILQHLKRWGNKWSWIARSLPGRTDNEIKNYWRTHLRKRT      |
| <i>Vitis vinifera</i> Genoscope.12X | GSVIVT01034041001 | Vv2R-MYB104 | RGDRVKGWWSPEEDAILSRVSKFGARNWSLIARGIAGRSKSCRLRWYNLYRDLKRGFTPEEDRIIVAAHAIHGNKWSIARLLQGRTDNAIKNHWNSTLRRRC       |
| <i>Vitis vinifera</i> Genoscope.12X | GSVIVT01034166001 | Vv2R-MYB105 | MKERQRWRAEEDALLRAYVRYQYGPREWNLVSQRMNTPLGRDAKSLERWKNYLRPGIKKGSLSLEEQRLVIRLQAKHGNKWKIAAEVPGRTAKRLGKWEVFEKQKQ   |
| <i>Vitis vinifera</i> Genoscope.12X | GSVIVT01034943001 | Vv2R-MYB106 | EMDLRRGPWTEEDLTLVNYIATQGEGRWNSLARCAGLKRGTGKSCRLRWLNLYRDLKRGFTPEEEDLIRLHKLGNRWWSKIAQHLPGRTDNEIKNYWRTRVQKHA    |
| <i>Vitis vinifera</i> Genoscope.12X | GSVIVT01035041001 | Vv2R-MYB107 | KMGLKKGWTEQEDELIRKYIANGEGCWRSLPKNAGLLRCGKSCRLRWYNLYRDLKRGFTPEEEDTIVKLHSSWGNRWSLIAGHLPGRTDNEIKNYWNSHLSRRI     |
| <i>Vitis vinifera</i> Genoscope.12X | GSVIVT01035177001 | Vv2R-MYB108 | ESGLKKGWTPPEEDQKLVKYIQKQGHGSWRALPKLAGLNRCGKSCRLRWYNLYRDLKRGFTPEEEDLIRLHKLGNRWWSIAASHLPGRTDNEIKNFNTHLKKKL     |
| <i>Vitis vinifera</i> Genoscope.12X | GSVIVT01035332001 | Vv2R-MYB109 | KANVKGWWSPEEDATLRNYVQTHGIGGNWIALPRKAGLRCGKSCRLRWYNLYRDLKRGFTPEEEDKVICAIYNQMGSRWSVIASQLPGRTDNDVKNYWNTLKKKL    |
| <i>Vitis vinifera</i> Genoscope.12X | GSVIVT01035459001 | Vv2R-MYB110 | KEGLNRGAWTALEDKILTAYIKAHGEGKWRNLPKAGLRCGKSCRLRWYNLYRDLKRGFTPEEEDLIRLHKLGNRWSLIAGRPLGRTDNEIKNYWNTLGGKI        |
| <i>Vitis vinifera</i> Genoscope.12X | GSVIVT01035461001 | Vv2R-MYB111 | KEGMNKGAWTAIEDELLVEYIKVHGEKWSGIPKSKGLKRCGKSCRLRWYNLYRDLKRGFTPEEEDLIRLHKLGNRWSLIAGRIPGRTDNEIKNYWNTLFAKKA      |
| <i>Vitis vinifera</i> Genoscope.12X | GSVIVT01035462001 | Vv2R-MYB112 | KEGLNRGAWTALEDKILSDYIKVHGEKWRNIPKQAGLRCGKSCRLRWYNLYRDLKRGFTPEEEDLIRLHKLGNRWALIAGRPLGRTDNEIKNYWNTLRRKV        |
| <i>Vitis vinifera</i> Genoscope.12X | GSVIVT01035463001 | Vv2R-MYB113 | EDGLNKGWTAHEDEVLGNVYKLVHGEKQWVNAKATGLKRSKSCRLRWYNLYRDLKRGFTPEEEDLIRLHKLGNRWSLIAGRPLGRTDNEIKNYWNTLKKKV        |
| <i>Vitis vinifera</i> Genoscope.12X | GSVIVT01035464001 | Vv2R-MYB114 | TRRSNRGAWTALEDKLLRDYVKTGHGPKWRNVSQETGLERSGKSCRLRWYNLYRDLKRGFTPEEEDLIRLHKLGNRWSLIAGRPLGRSDNEIKNYWNTLAKRV      |
| <i>Vitis vinifera</i> Genoscope.12X | GSVIVT01035467001 | Vv2R-MYB115 | KKEANRGAWTAEDHKLAVIAVHGAKRWKCVAAMKAGLRCGKSCRLRWYNLYRPNIKRGNISDQEQDLIRLHKLGNRWSLIAGRPLGRTDNEIKNYWNSHLSKKT     |
| <i>Vitis vinifera</i> Genoscope.12X | GSVIVT01036446001 | Vv2R-MYB116 | MKERQRWQPEEDALLRAYVKYQYGAKEWNLISHRMGKSLDRDPKSLERWKNYLRPGIKKGSLSLEEQNLVLSLQAKYGNKWKIAEVPGRGRTAKRLGKWEVFEKQL   |
| <i>Vitis vinifera</i> Genoscope.12X | GSVIVT01036552001 | Vv2R-MYB117 | VQGWKGPWTPPEEDKLLSEYVSSHGEGRWSSVARSGLNRSKSCRLRWYNLYRDLKRGFTPEEEDLIRLHKLGNRWWSIAASHLPGRTDNEIKNYWRTHFKKNQ      |
| <i>Vitis vinifera</i> Genoscope.12X | GSVIVT01036633001 | Vv2R-MYB118 | AKEGLNRGAWTVVEDNILDYIQTGHGEGWRSIPKNAKGLKRCGKSCRLRWYNLYRDLKRGFTPEEEDLIRLHKLGNRWWSIAAKRPLGRTDNEIKNYWNTLRRKV    |
| <i>Vitis vinifera</i> Genoscope.12X | GSVIVT01036712001 | Vv2R-MYB119 | KQKVRGLWSPEEDEKLIRYTAHGHGSWSSVPKLAGLQRCGKSCRLRWYNLYRDLKRGFTPEEEDLIRLHKLGNRWQAIAKHLPGRTDNEIKNFVNSCIKKKL       |
| <i>Vitis vinifera</i> Genoscope.12X | GSVIVT01036802001 | Vv2R-MYB120 | KSKVKGWWSPEEDMRLVSIQKNGHENWRSPLKQAGLLRCGKSCRLRWYNLYRDLKRGFTPEEEDLIRLHKLGNRWWSIAASHLPGRTDNEIKNVWNTLKKRL       |
| <i>Vitis vinifera</i> Genoscope.12X | GSVIVT01037362001 | Vv2R-MYB121 | GGPLKKGWPTAEDAVALIDYVTKHGEGNWNAVMKHSGLSRCGKSCRLRWANHLRPNLKKGAFSPPEEHRILHARMGNKWARMMAELPGRTDNEIKNYWNTLRRQL    |
| <i>Vitis vinifera</i> Genoscope.12X | GSVIVT01037667001 | Vv2R-MYB122 | GVALKKGWPTAEDAVALVEYVTKHGEGNWNAVQKNSGLARCGKSCRLRWANHLRPNLKKGSFSAEERVILELHAKLGNKWARMMAAQLPGRTDNEIKNYWNTLRRRL  |
| <i>Vitis vinifera</i> Genoscope.12X | GSVIVT01025034001 | Vv2R-MYB123 | QEEIRKGPWTEKEDFLVCFVGLFGDRRWFIAKVSGLNRTGKSCRLRWYNLYRDLKRGFTPEEEDLIRLHKLGNRWWSIAAKRPLGRTDNEIKNYWRTHMRKKA      |
| <i>Vitis vinifera</i> Genoscope.12X | GSVIVT01009566001 | Vv2R-MYB124 | KSERIKGSWSAEEDRVLTRLVRYGARNWLSIRYIKRSGKSCRLRWYNLYRDLKRGFTPEEEDLIRLHKLGNRWWSIAAKRPLGRTDNAVKNHWNSTLEAAF        |
| <i>Vitis vinifera</i> Genoscope.12X | GSVIVT01013979001 | Vv2R-MYB125 | KNGLKKGWPTVEEDQKSPHYKEQRHGETSSWKNVPTRAGLSRSPKSCRLRWNSKLPKGINEKPFSEEEETIIEHQKHGNKWATIAKCLPGRDTGKFNWNTLKKKL    |

|                                     |                   |             |                                                                                                                                                                                                                                                                                                                                                                                                                                                                                                                                                                                                                                                                                                                                                                                                                                                                                                                                                                                                                     |
|-------------------------------------|-------------------|-------------|---------------------------------------------------------------------------------------------------------------------------------------------------------------------------------------------------------------------------------------------------------------------------------------------------------------------------------------------------------------------------------------------------------------------------------------------------------------------------------------------------------------------------------------------------------------------------------------------------------------------------------------------------------------------------------------------------------------------------------------------------------------------------------------------------------------------------------------------------------------------------------------------------------------------------------------------------------------------------------------------------------------------|
| <i>Vitis vinifera</i> Genoscope.12X | GSVIVT01035664001 | Vv3R-MYB1   | TRRSTTKGWTEEDDMLREAVQCYKGGKNNKKEVCLKDRTVIQCQHRWQKVLNPEIVKGSWTKEEDEKMMKLVKIYGPKKWSNIAKHLPGRIGKQCRERWHNHLNPAINKEA<br>WTEEDLALMHAHQIHGNKWAELTKFLPGRTDNAIKNHWNCSVKKKM<br>TRRSTKGQWTAEEDELLCKAVQRFKGNKWKIAECFKDRTDVQCLHRWQKVLNPELIGKGPSKEEDEIIELVNKYGPKKWSTIAQALPGRIGKQCRERWHNHLNPAINKEAWT<br>QEEELALIAHQIYGNKWAELTKFLPGRTDNAIKNHWNSSVKKKL<br>TRRSTKGQWTAEEDEILCKAVQRYKGNKWKIAECFKDRTDVQCLHRWQKVLNPELVKGPWSKEEDEVIIELVNKYGAKKWSTIAQHLPGRIGKQCRERWHNHLNPAINKEAW<br>TQEEELALVRAHQIYGNKWAELTKFLPGRTDNAIKNHWNSSVKKKL<br>TRRSTKGGWTEEDDNLTTVVKNFNGRNWKIAEYLHGRTDIQCCLHRWQKVLNPELVKGPWTKEEDDCIVESVKYGGKRWSMIAKALPGRIGKQCRERWHNHLDPAIKKA<br>WTKEEEAILTYHQLYGNKWAELTKFLPGRTDNAIKNHWNCSIKKKS<br>PIRRAKGGWTPQEDDLRTAVAYFKGKSWKIAEFPDRSEVQCLHRWQKVLNPELVKGPWTKEEDDKITELVSKYGPTKWSVIAKSLPGRIGKQCRERWHNHLNPDIKKDAWT<br>LDEELALMNAHSHGNKWAELTKFLPGRTDNSIKNHWNSSVKKKL<br>ARRSTKGFWEQKDRVLAAYVKNFKGNKWKIAECVTGTTDVQCLHRWQKVLNPELVKGPWTKEEDDLIELVKGQGNKWAELAKCLTGRIGKQCRERWHNHLNPAINKA<br>PWTKEEELVLIQAQKYGKNAEIAKILPGRTEINSIKNHWNCSLKKRL |
| <i>Citrus sinensis</i> v1.1         | orange1.1g016021m | Csi2R-MYB01 | GVILKKGWPTSADAILIDYVKKHGEWNVAQKNSGLFRGKSCRLRWANHLRPNLKKGAFTQEEEQMIVELHAKMGKWARMAAHLPGRTDNEIKNYWNTRIKRRQ                                                                                                                                                                                                                                                                                                                                                                                                                                                                                                                                                                                                                                                                                                                                                                                                                                                                                                             |
| <i>Citrus sinensis</i> v1.1         | orange1.1g012494m | Csi2R-MYB02 | SSSRVKGWSPPEEDAVLSRLVSQFGARNWGMARGIPGRSGKSCRLRWCNQLDPCLKRKPFDEEDQIIISAHAVHGNKWA VIARLLPGRTDNAIKNHWNSTLRRRY                                                                                                                                                                                                                                                                                                                                                                                                                                                                                                                                                                                                                                                                                                                                                                                                                                                                                                          |
| <i>Citrus sinensis</i> v1.1         | orange1.1g013300m | Csi2R-MYB03 | KQKLRKGLWSPEEDEKLLRHITKYGHGCWSSVPKQAGLQRCGKSCRLRWINYLRLPDLKRGFTSQEENLIIELHAVLGNRWSQIAAQLPGRTDNEIKNLWNSLKKKL                                                                                                                                                                                                                                                                                                                                                                                                                                                                                                                                                                                                                                                                                                                                                                                                                                                                                                         |
| <i>Citrus sinensis</i> v1.1         | orange1.1g014135m | Csi2R-MYB04 | KQKLRKGLWSPEEDEKLLNYITKHGHGCWSSVPKLAGLQRCGKSCRLRWINYLRLPDLKRGAFVSQEEESLVELHAVLGNRWSQIAAQLPGRTDDEIKNLWNSLKKKL                                                                                                                                                                                                                                                                                                                                                                                                                                                                                                                                                                                                                                                                                                                                                                                                                                                                                                        |
| <i>Citrus sinensis</i> v1.1         | orange1.1g014829m | Csi2R-MYB05 | KVGLKKGWTAEEEDDLTKYIQANGEGSWRSLPKNAGLLRCGKSCRLRWINYLRLADLKRGNITAEIIIKHLASLGNRWSLIASNPGRTDNEIKNYWNSHLRRI                                                                                                                                                                                                                                                                                                                                                                                                                                                                                                                                                                                                                                                                                                                                                                                                                                                                                                             |
| <i>Citrus sinensis</i> v1.1         | orange1.1g016021m | Csi2R-MYB06 | KQKLRKGLWSPEEDEKLLNYITRFGVGCWSSVPKLAGLQRCGKSCRLRWINYLRLPDLKRGMFSSQEEELIISLHEVLGNRWAQIASQLPGRTDNEIKNFWNSLKKKL                                                                                                                                                                                                                                                                                                                                                                                                                                                                                                                                                                                                                                                                                                                                                                                                                                                                                                        |
| <i>Citrus sinensis</i> v1.1         | orange1.1g016708m | Csi2R-MYB07 | KVGLKKGWTPPEEDQKLLAYIEEHGHSWRALPAKAGLQRCGKSCRLRWITNLYRPNLKRKGFSLQEEQTIQLHALLGNRWSAIAIHLPRKTDNEIKNYWNTHLKRL                                                                                                                                                                                                                                                                                                                                                                                                                                                                                                                                                                                                                                                                                                                                                                                                                                                                                                          |
| <i>Citrus sinensis</i> v1.1         | orange1.1g017566m | Csi2R-MYB08 | GRSRVKGWSPQDAVLSSELVSKFGARNWLSIARGIAGRSKSCRLRWCNQLDPAVKRKPFTDEEDQIIVAHAHVHGNKWA VIARLLPGRTDNAIKNHWNSTLRRRG                                                                                                                                                                                                                                                                                                                                                                                                                                                                                                                                                                                                                                                                                                                                                                                                                                                                                                          |
| <i>Citrus sinensis</i> v1.1         | orange1.1g017727m | Csi2R-MYB09 | KANVKKGPWSPPEEDAKLDYIEKYGTGGNWIAPKIGLKRCKGKSCRLRWINYLRLPNIKHGGFSEEDNIICSLYISIGSRWSIIAQLPGRTDNDIKNYWNTLKKKL                                                                                                                                                                                                                                                                                                                                                                                                                                                                                                                                                                                                                                                                                                                                                                                                                                                                                                          |
| <i>Citrus sinensis</i> v1.1         | orange1.1g018154m | Csi2R-MYB10 | KSLKKGWTPPEEDQKLLIDYIYKHGYNWRTLPKNAGLQRCGKSCRLRWITNLYRPNLKRKGRFAFEETIQLHSILGNKWSAIAARLPGRTDNEIKNYWNTHIRKRL                                                                                                                                                                                                                                                                                                                                                                                                                                                                                                                                                                                                                                                                                                                                                                                                                                                                                                          |
| <i>Citrus sinensis</i> v1.1         | orange1.1g018559m | Csi2R-MYB11 | KVGKKGWTPPEEDIIIVSYIQEHGPNWRSVPTNTGLLRCSKSCRLRWITNLYRPNLKRKGRNFTPEEEMIIHLQALLGNKWAIAIASYLQRTDNDIKNYWNTLKKKL                                                                                                                                                                                                                                                                                                                                                                                                                                                                                                                                                                                                                                                                                                                                                                                                                                                                                                         |
| <i>Citrus sinensis</i> v1.1         | orange1.1g018746m | Csi2R-MYB12 | KIGIKKGWTPPEEDIIIVSYIQEHGPNWRAVPTNTGLLRCSKSCRLRWITNLYRPNLKRKGRNFTDQEEKMIHLQALLGNRWAIAIASYLQRTDNDIKNYWNTLKKKV                                                                                                                                                                                                                                                                                                                                                                                                                                                                                                                                                                                                                                                                                                                                                                                                                                                                                                        |
| <i>Citrus sinensis</i> v1.1         | orange1.1g018768m | Csi2R-MYB13 | MKERQRWRAEEDALLRAYVYKQYGPKEWFSVQSRMNTPLNRDAKSLERWKNYLKPGIKKGLTDEEQHLVIHLQAKHGNKWKIAAEVPGRTAKRLGKWWVEVFEKQ                                                                                                                                                                                                                                                                                                                                                                                                                                                                                                                                                                                                                                                                                                                                                                                                                                                                                                           |
| <i>Citrus sinensis</i> v1.1         | orange1.1g019307m | Csi2R-MYB14 | KIGVKKGPWTPPEEDIIIVSYIQEHGPNWRSVPTNTGLLRCSKSCRLRWITNLYRPNLKRKGRNFTDHEEKMIHLQALLGNRWAIAIASYLQRTDNDIKNYWNTLKKKL                                                                                                                                                                                                                                                                                                                                                                                                                                                                                                                                                                                                                                                                                                                                                                                                                                                                                                       |
| <i>Citrus sinensis</i> v1.1         | orange1.1g019619m | Csi2R-MYB15 | ANKLRKGLWSPEEDDKLIKMLTNGQGCWSDIARNAGLQRCGKSCRLRWINYLRLPDLKRGAFSPQEEELIHLHSILGNRWSQIAARLPGRTDNEIKNFWNSTLKKIL                                                                                                                                                                                                                                                                                                                                                                                                                                                                                                                                                                                                                                                                                                                                                                                                                                                                                                         |
| <i>Citrus sinensis</i> v1.1         | orange1.1g019787m | Csi2R-MYB16 | KANVKKGPWSPPEEDSKLKEYIEKYGTGGNWIAPKAGLKRCKGKSCRLRWINYLRLPNIKHGEFTDEEDRLICSLFASIGSRWSIIAQLPGRTDNDIKNYWNTLKKKL                                                                                                                                                                                                                                                                                                                                                                                                                                                                                                                                                                                                                                                                                                                                                                                                                                                                                                        |
| <i>Citrus sinensis</i> v1.1         | orange1.1g019911m | Csi2R-MYB17 | DLDLRRGPWTEEDFKLNYISNHGEGRWNLARACAGLKRKTKGKSCRLRWINYLRLPDRRGNITLLEEQMLILELHSRWGNRWSKIAQHLPGRTDNEIKNYWRTRVQKHA                                                                                                                                                                                                                                                                                                                                                                                                                                                                                                                                                                                                                                                                                                                                                                                                                                                                                                       |
| <i>Citrus sinensis</i> v1.1         | orange1.1g020106m | Csi2R-MYB18 | TSTCPRGHRPAEEDKRLQVEQYGAQNWSIAEKLQGRSGKSCRLRWQNLDPINRRPFTDEEERLLAAHRIHGNKWA IARLLPGRTDNAVKNHWHVIMARKQ                                                                                                                                                                                                                                                                                                                                                                                                                                                                                                                                                                                                                                                                                                                                                                                                                                                                                                               |
| <i>Citrus sinensis</i> v1.1         | orange1.1g020197m | Csi2R-MYB19 | DLDMRKGWTPPEEDFKLNYIVTHGEGRWNLARACAGLKRKTKGKSCRLRWINYLRLPDRVRLGKITLLEEQMLILELHSRWGNRWSKLAQHLPGRTDNEIKNYWRTRVQKQA                                                                                                                                                                                                                                                                                                                                                                                                                                                                                                                                                                                                                                                                                                                                                                                                                                                                                                    |
| <i>Citrus sinensis</i> v1.1         | orange1.1g020603m | Csi2R-MYB20 | SDQLRRGPWTEEDTLIYISRHSEGRWNLLAKRSLKRTGKSCRLRWINYLKPDVKGKGLTPQEQMSILELHSGWGNRWSKIAQHLPGRTDNEIKNYWRTRVQKQA                                                                                                                                                                                                                                                                                                                                                                                                                                                                                                                                                                                                                                                                                                                                                                                                                                                                                                            |
| <i>Citrus sinensis</i> v1.1         | orange1.1g020613m | Csi2R-MYB21 | QQKVKRGLWSPEEDEKLIRYITTHGYGCWSEVPEKAGLQRCGKSCRLRWINYLRLPDIRRGRFTPEEEKLIISLHVS VGNRWAHIAHSLPGRTDNEIKNYWNSWIKKI                                                                                                                                                                                                                                                                                                                                                                                                                                                                                                                                                                                                                                                                                                                                                                                                                                                                                                       |
| <i>Citrus sinensis</i> v1.1         | orange1.1g020997m | Csi2R-MYB22 | KANVKKGPWSPPEEDAKLKEYIEKNGTGGNWIAPKAGLMRCGKSCRLRWINYLRLPNINHGFEDEEDRIICSLFASIGSRWSTIAAQLPGRTDNDIKNYWNTLKKKL                                                                                                                                                                                                                                                                                                                                                                                                                                                                                                                                                                                                                                                                                                                                                                                                                                                                                                         |
| <i>Citrus sinensis</i> v1.1         | orange1.1g021071m | Csi2R-MYB23 | EVDRIKGPWSPPEEDALQVLQKHGPNWLSLKSIPGRSGKSCRLRWQNLSPQVEHRAFTPEEDEMIIRAHARFGNKWATIARLLNGRTDNAIKNHWNSTLKRKC                                                                                                                                                                                                                                                                                                                                                                                                                                                                                                                                                                                                                                                                                                                                                                                                                                                                                                             |
| <i>Citrus sinensis</i> v1.1         | orange1.1g021164m | Csi2R-MYB24 | GNKLRKGLWSPEEDDKLMNYMLKNGQGCWSDVARNAGLQRCGKSCRLRWINYLRLPDLKRGAFSPQEEELIHLHSLGNRWSQIAARLPGRTDNEIKNFWNSTIKKRL                                                                                                                                                                                                                                                                                                                                                                                                                                                                                                                                                                                                                                                                                                                                                                                                                                                                                                         |
| <i>Citrus sinensis</i> v1.1         | orange1.1g021188m | Csi2R-MYB25 | QQELRRGPWTEEDTLTHYIHHGEGRWNMVAKCAGLKRKTKGKSCRLRWINYLKPDIKRGNLTPQEQFLILELHSGWGNRWSKIAQCLPGRTDNEIKNYWRTRVQKQA                                                                                                                                                                                                                                                                                                                                                                                                                                                                                                                                                                                                                                                                                                                                                                                                                                                                                                         |
| <i>Citrus sinensis</i> v1.1         | orange1.1g021220m | Csi2R-MYB26 | KEHTNKGAWTKEEDERLNYIKVHGEWCWRSPLKAGLLRCGKSCRLRWINYLRLPDLKRGNFTDEEDELINFHSLGNKWSLIAARLPGRTDNEIKNYWNTHIRKRL                                                                                                                                                                                                                                                                                                                                                                                                                                                                                                                                                                                                                                                                                                                                                                                                                                                                                                           |
| <i>Citrus sinensis</i> v1.1         | orange1.1g021486m | Csi2R-MYB27 | KKGLKKGWPAEEDKILVEYIKRNGHGSWRSPLKAGLLRCGKSCRLRWITNLYRPNLKRKGRNFTPEEEKLVQLHGILGNRWAIAIASYLQRTDNEIKNLWNTLKKRM                                                                                                                                                                                                                                                                                                                                                                                                                                                                                                                                                                                                                                                                                                                                                                                                                                                                                                         |
| <i>Citrus sinensis</i> v1.1         | orange1.1g021498m | Csi2R-MYB28 | KVGLKKGWTAEEEDKILINFTNGQCCWRAVPKLAGLLRCGKSCRLRWITNLYRPNLKRGLLSEYEEKMVIDLHAQLGNRWSKIAHSLPGRTDNEIKNHWNTHIKKKL                                                                                                                                                                                                                                                                                                                                                                                                                                                                                                                                                                                                                                                                                                                                                                                                                                                                                                         |
| <i>Citrus sinensis</i> v1.1         | orange1.1g021503m | Csi2R-MYB29 | KAHTNKGAWTKEEDRLIAYIRAHGEGCWRSPLKAGLLRCGKSCRLRWINYLRLPDLKRGNFTDEEDELIIKLSLGNKWSLIAARLPGRTDNEIKNYWNTHIRKRL                                                                                                                                                                                                                                                                                                                                                                                                                                                                                                                                                                                                                                                                                                                                                                                                                                                                                                           |
| <i>Citrus sinensis</i> v1.1         | orange1.1g022144m | Csi2R-MYB30 | DVDRIKGPWSPPEEDALQVLVQNYGPNWLSLKSIPGRSGKSCRLRWQNLSPQVEHRAFTPEEDEMIIRAHARFGNKWATIARLLNGRTDNAIKNHWNSTLKRKC                                                                                                                                                                                                                                                                                                                                                                                                                                                                                                                                                                                                                                                                                                                                                                                                                                                                                                            |
| <i>Citrus sinensis</i> v1.1         | orange1.1g023056m | Csi2R-MYB31 | KAHTNKGAWTKEEDQRLIDYIRAHGEGCWRSPLKAGLLRCGKSCRLRWINYLRLPDLKRGNFTDEEDELIIKLSLGNKWSLIAARLPGRTDNEIKNYWNTHIRKRL                                                                                                                                                                                                                                                                                                                                                                                                                                                                                                                                                                                                                                                                                                                                                                                                                                                                                                          |
| <i>Citrus sinensis</i> v1.1         | orange1.1g023677m | Csi2R-MYB32 | RLFRRYTNFRSNSFNMYKVFVGLNRTGKSCRLRWVNYLHPGLKRGKMTPEERLVLHAKWGNRWSRIARLPGRTDNEIKNYWRTHMRKKA                                                                                                                                                                                                                                                                                                                                                                                                                                                                                                                                                                                                                                                                                                                                                                                                                                                                                                                           |
| <i>Citrus sinensis</i> v1.1         | orange1.1g024441m | Csi2R-MYB33 | KLGVKKGWTAEEEDKILINFTNGQCCWRAVPKLAGLLRCGKSCRLRWITNLYRPNLKRGLLTAEEQLVIDLHARLGNRWSKIAARLPGRTDNEIKNHWNTHIKKKL                                                                                                                                                                                                                                                                                                                                                                                                                                                                                                                                                                                                                                                                                                                                                                                                                                                                                                          |
| <i>Citrus sinensis</i> v1.1         | orange1.1g024484m | Csi2R-MYB34 | KMGLKKGWTPPEEDRILVHIKHHGPNWRALPKQAGLLRCGKSCRLRWINYLRLPDIKRGNFSKEEETIINLHDMGNRWSAIAARLPGRTDNEIKNVWNTLKKKA                                                                                                                                                                                                                                                                                                                                                                                                                                                                                                                                                                                                                                                                                                                                                                                                                                                                                                            |
| <i>Citrus sinensis</i> v1.1         | orange1.1g024492m | Csi2R-MYB35 | KMGLKKGWTPPEEDQILINYVLYGHGNWRALPKQAGLLRCGKSCRLRWINYLRLPDIKRGNFTREEEDTIINLHEMLGNRWSAIAARLPGRTDNEIKNVWNTLKKKL                                                                                                                                                                                                                                                                                                                                                                                                                                                                                                                                                                                                                                                                                                                                                                                                                                                                                                         |
| <i>Citrus sinensis</i> v1.1         | orange1.1g024849m | Csi2R-MYB36 | KLGVKKGWTADEEDKLVTFILTHGHCCWRAVPKLAGLLRCGKSCRLRWITNLYRPNLKRGLLNEAEEQLVIDLHARLGNRWSKIAARLPGRTDNEIKNHWNTHIKKKL                                                                                                                                                                                                                                                                                                                                                                                                                                                                                                                                                                                                                                                                                                                                                                                                                                                                                                        |
| <i>Citrus sinensis</i> v1.1         | orange1.1g024860m | Csi2R-MYB37 | KTGLKKGWTPPEEDRKLIAVYTKYGYWNWRQLPKYAGLARCCKGKSCRLRWVNYLRLPNIKRGNFTKEEEDTIIRLHESLGNRWSAIAAQLPGRTDNEIKNHWNTHSLKRL                                                                                                                                                                                                                                                                                                                                                                                                                                                                                                                                                                                                                                                                                                                                                                                                                                                                                                     |
| <i>Citrus sinensis</i> v1.1         | orange1.1g025351m | Csi2R-MYB38 | KPERIKGPWSAEDRILRLVERYGPNWLSLISYIKGRSGKSCRLRWQNLSPSAHRPSPAEDDTILAAHARFGNRWATIARLLPGRTDNAVKNHWNSTLKRRT                                                                                                                                                                                                                                                                                                                                                                                                                                                                                                                                                                                                                                                                                                                                                                                                                                                                                                               |

|                             |                   |             |                                                                                                                   |
|-----------------------------|-------------------|-------------|-------------------------------------------------------------------------------------------------------------------|
| <i>Citrus sinensis</i> v1.1 | orange1.1g025602m | Csi2R-MYB39 | GEGLNRGAWKAVEDKILTDYIKAYGEGKWRHIPKAAGLKRCGKSCRLRWMNLYLRPDIKRGNFSKDEEDLVIRLHKLLGNRWALIAGRLPGRTDNDIKNYWNTKLSKRV     |
| <i>Citrus sinensis</i> v1.1 | orange1.1g025697m | Csi2R-MYB40 | MCTRGHWPAEDEKLRELVERYGPHNWNIAEKLQGRSGKSCRLRWFNQLDPRINRSPFTEEEERLLASHRIHGNRWA VIARLFPGRTDNAVKNHWHVIMARRC           |
| <i>Citrus sinensis</i> v1.1 | orange1.1g028843m | Csi2R-MYB41 | KNVVRGAWTAEDRKLTEYIEIHGAKRWKNVATESGLNRCGKSCRLRWLNLYLRPNIKRGNISDDEEDLILRLHKLLGSRWSLIAGRLPGRTDNEIKNYWNSHLSKKI       |
| <i>Citrus sinensis</i> v1.1 | orange1.1g028922m | Csi2R-MYB42 | KKEANRGAWTAEDQKLAQAEVHGPKKWKSVAAKAGLNRCGKSCRLRWMNLYLRPHIKRGNISDQEEEDLILRLHKLLGSRWSLIAGRLPGRTDNEIKNYWNSHLSKKI      |
| <i>Citrus sinensis</i> v1.1 | orange1.1g035629m | Csi2R-MYB43 | KNGLKKGWPTPEEDHKLISYIQLHGPGNWRNLPKNAGLQRCGKSCRLRWLNLYLRPDIKRGKFSFEEETIIQLHSILGNKWSAIAARLPGRTDNEIKNYWNTHIRKRL      |
| <i>Citrus sinensis</i> v1.1 | orange1.1g036087m | Csi2R-MYB44 | KQKVKGLWSPEEDEKLLKHITAHGHGSWSSVPKLAGLQRCGKSCRLRWLNLYLRPDLRRGSFTEEEEQIIDVHRILGSRWSIAIAGRLPGRTDNEIKNYWNSCIKKKL      |
| <i>Citrus sinensis</i> v1.1 | orange1.1g036215m | Csi2R-MYB45 | KVGIKKGWPTPEEDEILSNYIKREGEQWRTLPKRAGLLRCGKSCRLRWMNLYLRPSIKRGHIAPEDEEDLILRLHRLGSRWSLIAGRIPGRTDNEIKNYWNTLRKRL       |
| <i>Citrus sinensis</i> v1.1 | orange1.1g036344m | Csi2R-MYB46 | KANVKKGPWSPEEDAKLKA YIEQHTGGNWIAPHKIGLKRCGKSCRLRWLNLYLRPNIKHGGFSEEDNICSLSYISIGSRWSIAAQLPGRTDNDIKNYWNTLRKRL        |
| <i>Citrus sinensis</i> v1.1 | orange1.1g036591m | Csi2R-MYB47 | MDKSSPATFNKGAWTAEDRKLAEVIATHGPTKWKTIAAKTGLNRCGKSCRLRWMNLYLRPNIKRGSISDQEEEDLILRLHKLGNRWSLIAGRLPGRTDNEIKNYWNSHLSKKI |
| <i>Citrus sinensis</i> v1.1 | orange1.1g037024m | Csi2R-MYB48 | KANVVRGAWTAEDRKLAEVIATHGPTKWKTIAAKTGLNRCGKSCRLRWMNLYLRPNIKRGSISDQEEEDLILRLHKLGNRWSLIAGRLPGRTDNEIKNYWNSHLSKKI      |
| <i>Citrus sinensis</i> v1.1 | orange1.1g037956m | Csi2R-MYB49 | KPSLRKGSWTPPEEDRKLAIYIRRYGIWNWSEMPKYAGLLRCGKSCRLRWMNLYLRPDIRRGNFTQEEDETIILKHEQLGNRWSAIAARLPGRTDNEIKNYWNSHLSKKI    |
| <i>Citrus sinensis</i> v1.1 | orange1.1g037998m | Csi2R-MYB50 | ENGLKKGWPTPEEDQKLVEFIQKHGHGSWRALPKLAGLNRGKSCRLRWLNLYLRPDIKRGKFSQDEEQTILHLHSILGNKWSAIAATHLPGRTDNEIKNYWNTLRKRL      |
| <i>Citrus sinensis</i> v1.1 | orange1.1g038795m | Csi2R-MYB51 | REEIRKGPWKAEEDEVLIHNVKKYGPRDWSIRSKGLLQRTGKSCRLRWLNLYLRPNLKNKGFSLSEERIVIELQAQFGNKWARIATYLPGRTDNDVKNFWSRQKRLA       |
| <i>Citrus sinensis</i> v1.1 | orange1.1g039016m | Csi2R-MYB52 | KVGLKKGWPTPEEDQKLLAFIEQHGHGSWRALPAKAGLQRCGKSCRLRWLNLYLRPDIKRGKFSLQEEETIILHALLGNRWSAIAAHLPKRTDNEIKNYWNTLRKRL       |
| <i>Citrus sinensis</i> v1.1 | orange1.1g039070m | Csi2R-MYB53 | KQKVKRGLWSPEEDEKLKIHVTTHGHGSWSSVPKLAGLQRCGKSCRLRWLNLYLRPDLKRGFSFTEEEEQIIDIRILGNRWAQIAKHLPGRTDNEIKNYWNSCIKKKL      |
| <i>Citrus sinensis</i> v1.1 | orange1.1g039198m | Csi2R-MYB54 | INNIKKGWPTPEEDQKLIDYIRKHGHGSWRALPKLAGLNRGKSCRLRWLNLYLRPDIKRGKFSFEEEQIIVNLHVLGNKWSAIAATRLPGRTDNEIKNYWNTLRKRL       |
| <i>Citrus sinensis</i> v1.1 | orange1.1g039708m | Csi2R-MYB55 | HQSLKKGWPTAAEDAILMEYVKKHGEKNWNAVQKNSGLMRCGKSCRLRWANHLRPNLKKGFSPEEEKIIIEHLAKLGNKWARMQAQLPGRTDNEIKNYWNTLRKRL        |
| <i>Citrus sinensis</i> v1.1 | orange1.1g040502m | Csi2R-MYB56 | VSERVKGWSPPEEDQLLKLQRYGARNWSVISKIPGRSGKSCRLRWLNLYLRPDIKRGKFSFTEEEEQIIVNLHVLGNKWSAIAATRLPGRTDNEIKNYWNTLRKRL        |
| <i>Citrus sinensis</i> v1.1 | orange1.1g040726m | Csi2R-MYB57 | KVGLKKGWPTPEEDLANYINKEGEGRWRTLPKRAGLLRCGKSCRLRWLNLYLRPDIKRGKFSFTEEEEQIIVNLHVLGNKWSAIAATRLPGRTDNEIKNYWNTLRKRL      |
| <i>Citrus sinensis</i> v1.1 | orange1.1g040841m | Csi2R-MYB58 | KVGLKKGWPTPEEDLANYINKEGEGRWRTLPKRAGLLRCGKSCRLRWLNLYLRPDIKRGKFSFTEEEEQIIVNLHVLGNKWSAIAATRLPGRTDNEIKNYWNTLRKRL      |
| <i>Citrus sinensis</i> v1.1 | orange1.1g041081m | Csi2R-MYB59 | KVGLKKGWPTPEEDLANYINKEGEGRWRTLPKRAGLLRCGKSCRLRWLNLYLRPDIKRGKFSFTEEEEQIIVNLHVLGNKWSAIAATRLPGRTDNEIKNYWNTLRKRL      |
| <i>Citrus sinensis</i> v1.1 | orange1.1g041991m | Csi2R-MYB60 | MEKMKRGVWSPPEEDAKLIQYIKEHGHGTWRHLPKQAGILRSGKSCRLRWLNLYLRPDIKRGKFSFTEEEEQIIVNLHVLGNKWSAIAATRLPGRTDNEIKNYWNTLRKRL   |
| <i>Citrus sinensis</i> v1.1 | orange1.1g042846m | Csi2R-MYB61 | ENGMKKGAWSPPEEDKLLRAYILKYGHWNWVGPVAGLNRGKSCRLRWLNLYLRPDIKRGKFSFTEEEEQIIVNLHVLGNKWSAIAATRLPGRTDNEIKNYWNTLRKRL      |
| <i>Citrus sinensis</i> v1.1 | orange1.1g043269m | Csi2R-MYB62 | ILGVRKGPWTPPEEDSLLMNYVAIHGEGRWNAVASSAGLNRTGKSCRLRWLNLYLRPDIKRGKFSFTEEEEQIIVNLHVLGNKWSAIAATRLPGRTDNEIKNYWNTLRKRL   |
| <i>Citrus sinensis</i> v1.1 | orange1.1g043557m | Csi2R-MYB63 | KSNVVRGLWTPPEEDAKLLAHVANHGTVGNWTLVPPKAGLNRGKSCRLRWLNLYLRPDLRHSFAPHEEEIINLHKAIGSRWSLIAAQLPGRTDNDVKNFWNTLRKRL       |
| <i>Citrus sinensis</i> v1.1 | orange1.1g043612m | Csi2R-MYB64 | KQKVKRGLWSPEEDEKLINVTYGHGCWSSVPKHAGLQRCGKSCRLRWLNLYLRPDLKRGFSFTEEEEQIIVNLHVLGNKWSAIAATRLPGRTDNEIKNYWNTLRKRL       |
| <i>Citrus sinensis</i> v1.1 | orange1.1g044021m | Csi2R-MYB65 | KNNIIGQWTPQEDRMLRLVAQHGTKKWSVIAMTGRVKGQCRERWYVNLKPDIKKEAWSEEDMILIQAHKEVGNRWAEIARLLIGRTENTIKNHNWNTLRKRL            |
| <i>Citrus sinensis</i> v1.1 | orange1.1g044161m | Csi2R-MYB66 | EEKLSKGPWHEEDELVTFTLFGERRWDYIAKASGLKRSKSCGLRWLNLYLRPNIKHGYISTEEEQIIVNLHVLGNKWSAIAATRLPGRTDNEIKNYWNTLRKRL          |
| <i>Citrus sinensis</i> v1.1 | orange1.1g044864m | Csi2R-MYB67 | KQDTNKGAWSKQEDQKLIDYIRKHGEGRWRTIPQAAGLARCGKSCRLRWLNLYLRPDLKRGKFSFTEEEEQIIVNLHVLGNKWSAIAATRLPGRTDNEIKNYWNTLRKRL    |
| <i>Citrus sinensis</i> v1.1 | orange1.1g044977m | Csi2R-MYB68 | KKERHIVTWTQEQEDILREIQSIHGTENWSIASKFKDKTTRQCRRRWYTYLNSDFKGGWSPPEEDMLLCEAQKIFGNRWTEIAKVVSGRTDNAVKNRFTLCKKRA         |
| <i>Citrus sinensis</i> v1.1 | orange1.1g045384m | Csi2R-MYB69 | EAEVRKGPWTPPEEDLILINIANHGEVWNSLAKAAGLKRTRGKSCRLRWLNLYLRPDIKRGKFSFTEEEEQIIVNLHVLGNKWSAIAATRLPGRTDNEIKNYWNTLRKRL    |
| <i>Citrus sinensis</i> v1.1 | orange1.1g045387m | Csi2R-MYB70 | KNGLKKGWPTAAEDQKLVYIYQKHGHGRWRTLPKNAGLQRCGKSCRLRWLNLYLRPDIKRGKFSFTEEEEQIIVNLHVLGNKWSAIAATRLPGRTDNEIKNYWNTLRKRL    |
| <i>Citrus sinensis</i> v1.1 | orange1.1g045400m | Csi2R-MYB71 | KPKHRKGLWSPEEDQRLKKNYVLQHGHPWSSVPINAGLQRCGKSCRLRWLNLYLRPDLKRGKFSFTEEEEQIIVNLHVLGNKWSAIAATRLPGRTDNEIKNYWNTLRKRL    |
| <i>Citrus sinensis</i> v1.1 | orange1.1g045411m | Csi2R-MYB72 | KSQVVRGAWSPGEDRLITFIQKHGHENWRALPKQAGLLRCGKSCRLRWLNLYLRPDLKRGKFSFTEEEEQIIVNLHVLGNKWSAIAATRLPGRTDNEIKNYWNTLRKRL     |
| <i>Citrus sinensis</i> v1.1 | orange1.1g045434m | Csi2R-MYB73 | ESGLKKGWPTSDQKLVKIQKHGHGSWRALPKLAGLNRGKSCRLRWLNLYLRPDIKRGKFSFTEEEEQIIVNLHVLGNKWSAIAATRLPGRTDNEIKNYWNTLRKRL        |
| <i>Citrus sinensis</i> v1.1 | orange1.1g045583m | Csi2R-MYB74 | KANVVRGAWTAEDRKLAEVIATHGPTKWKTIAAKTGLNRCGKSCRLRWLNLYLRPDIKRGKFSFTEEEEQIIVNLHVLGNKWSAIAATRLPGRTDNEIKNYWNTLRKRL     |
| <i>Citrus sinensis</i> v1.1 | orange1.1g046075m | Csi2R-MYB75 | SRSLKKGWPTPEEDQKLVYIYQKHGHGSWRALPKLAGLNRGKSCRLRWLNLYLRPDIRRGRFSEEEERIIINLHSLGNKWSAIAATRLPGRTDNEIKNYWNTLRKRL       |
| <i>Citrus sinensis</i> v1.1 | orange1.1g046093m | Csi2R-MYB76 | KVGLKKGWTAKEDEILTKYIQANGIESWRSLPKAGLLRCGKSCRLRWLNLYLRPDLRHSFAPHEEEIINLHKAIGSRWSLIAAQLPGRTDNDVKNFWNTLRKRL          |
| <i>Citrus sinensis</i> v1.1 | orange1.1g046309m | Csi2R-MYB77 | TKTCARGHWPAEDTKLKLVALYGPQNWNLIAEKLEGRSGKSCRLRWLNLYLRPDLRHSFAPHEEEIINLHKAIGSRWSLIAAQLPGRTDNDVKNFWNTLRKRL           |
| <i>Citrus sinensis</i> v1.1 | orange1.1g046419m | Csi2R-MYB78 | GVQLKKGWPTAAEDAILTEYVRKHGEKNWNAVQRNTGLARCGKSCRLRWANHLRPNLKKGTFSPPEERLIVELHAQLGNKWARMQAQLPGRTDNEIKNYWNTLRKRL       |
| <i>Citrus sinensis</i> v1.1 | orange1.1g046570m | Csi2R-MYB79 | NNDRIKGSWSPQEDATLKLVEQHGPRNWSMISSGIPGRSGKSCRLRWLNLYLRPDIKRGKFSFTEEEEQIIVNLHVLGNKWSAIAATRLPGRTDNEIKNYWNTLRKRL      |
| <i>Citrus sinensis</i> v1.1 | orange1.1g046581m | Csi2R-MYB80 | SVALIKGQWTPPEEDRKLKLVKQYGVKRWQAISERMAGRAGKQCRERWYVNLKPDIKKEAWSEEDMILIQAHKEVGNRWAEIARLLIGRTENTIKNHNWNTLRKRL        |
| <i>Citrus sinensis</i> v1.1 | orange1.1g046859m | Csi2R-MYB81 | KSNVVRGAWTAEDRKLAEVIATHGPTKWKTIAAKTGLNRCGKSCRLRWLNLYLRPDIKRGKFSFTEEEEQIIVNLHVLGNKWSAIAATRLPGRTDNEIKNYWNTLRKRL     |
| <i>Citrus sinensis</i> v1.1 | orange1.1g047012m | Csi2R-MYB82 | RIMIKGGVWKNTEDEILKAAVMKYGKNQWARISLLVRKSAKQCKARWYEWLDPISIKTEWTRREEDEKLLHLAKLMPTQWRTIAPVGRTPSQCLERYEKLLDAAC         |
| <i>Citrus sinensis</i> v1.1 | orange1.1g047101m | Csi2R-MYB83 | TNGLKRGWTPPEEDQKLLDYIKKHGHGSWRSLPEKADLQRCGKSCRLRWLNLYLRPDIKRGKFSFTEEEEQIIVNLHVLGNKWSAIAAHLPKRTDNEIKNYWNTLRKRL     |

|                             |                   |             |                                                                                                                                                                                                                                   |
|-----------------------------|-------------------|-------------|-----------------------------------------------------------------------------------------------------------------------------------------------------------------------------------------------------------------------------------|
| <i>Citrus sinensis v1.1</i> | orange1.1g047269m | Csi2R-MYB84 | ENEYKGLWTQEEDRILLEYIRVHGRGQWNRIHKVTGLKRCGKSCRLRWLNLYSPNVKHGEFTEEEENLIIRLHNLGNRWSLIAGRVPGRTDNQVKNHWNTLCKKL                                                                                                                         |
| <i>Citrus sinensis v1.1</i> | orange1.1g047550m | Csi2R-MYB85 | SKVCSRGHWRPAEDSKLKVVALYGPQWNLIAEKLEGRSGKSCRLRWFNQLDPRINKRAFSEDEEERLMAAHRVYGNKWAMIARLFPGRTDNAVKNHWVIMARKY                                                                                                                          |
| <i>Citrus sinensis v1.1</i> | orange1.1g047839m | Csi2R-MYB86 | DEGWRKGPWTAEDRLLIEYVRLHGEGRWNSVARLAGLRRNGKSCRLRWVNYLRPDLKRGQITPHEESIIEELHARWGNRWSIARSLPGRTDNEIKNYWRTHFKKKA                                                                                                                        |
| <i>Citrus sinensis v1.1</i> | orange1.1g047854m | Csi2R-MYB87 | EQGWRKGPWTPPEEDKLLTEHVNLGEGRWSSVARSAGLNRSKSCRLRWVNYLRPDLKRGQITPHEESIIEELHARWGNRWSIARSLPGRTDNEIKNYWRTHFKKKA<br>PIRRAKGGWTPPEEDELTRNAVSTFKGKSWKKAIEFFPDRSEVQCLHRWQKVLNPDLVKGPWTQEEDDKITELVSKYGPTKWSVIAKSLPGRIGKQCRERWHNHLNPDIKKDAWT |
| <i>Citrus sinensis v1.1</i> | orange1.1g009439m | Csi3R-MYB1  | LEELALMNAHRIHGKNAEIAKVLPGRTDNSIKNHWNSSLKLL<br>PIRRAKGGWTPPEEDELTRNAVSTFKGKSWKKAIEFFPDRSEVQCLHRWQKVLNPDLVKGPWTQEEDDKITELVSKYGPTKWSVIAKSLPGRIGKQCRERWHNHLNPDIKKDAWT                                                                 |
| <i>Citrus sinensis v1.1</i> | orange1.1g009430m | Csi3R-MYB2  | LEELALMNAHRIHGKNAEIAKVLPGRTDNSIKNHWNSSLKLL<br>PIRRAKGGWTPPEEDELTRNAVSTFKGKSWKKAIEFFPDRSEVQCLHRWQKVLNPDLVKGPWTQEEDDKITELVSKYGPTKWSVIAKSLPGRIGKQCRERWHNHLNPDIKKDAWT                                                                 |
| <i>Citrus sinensis v1.1</i> | orange1.1g009391m | Csi3R-MYB3  | LEELALMNAHRIHGKNAEIAKVLPGRTDNSIKNHWNSSLKLL<br>PIRRAKGGWTPPEEDELTRNAVSTFKGKSWKKAIEFFPDRSEVQCLHRWQKVLNPDLVKGPWTQEEDDKITELVSKYGPTKWSVIAKSLPGRIGKQCRERWHNHLNPDIKKDAWT                                                                 |
| <i>Citrus sinensis v1.1</i> | orange1.1g009430m | Csi3R-MYB4  | LEELALMNAHRIHGKNAEIAKVLPGRTDNSIKNHWNSSLKLL                                                                                                                                                                                        |
| <i>Arabidopsis thaliana</i> | At3g27920         | At2R-MYB000 | NQYKGLWTVEEDNILMDYVNLHGTVGNRIRVKTGLKRCGKSCRLRWNYLSPNVKGNFTEQEEDIIRLHKLGNRWSLIAKRVPGRTDNQVKNYWNTHLSKLL                                                                                                                             |
| <i>Arabidopsis thaliana</i> | At3g09230         | At2R-MYB001 | RRDRVKGWPSKEEDDVLSELVKKLGNRWSFIARSIPGRSGKSCRLRWCNQLNPNLIRNSFTEVEDQAIIAAHAIHGKNAEIAKVLPGRTDNAIKNHWNSSALRRRF                                                                                                                        |
| <i>Arabidopsis thaliana</i> | At2g47190         | At2R-MYB002 | DSDVRKGPWTEEDDAILVNFVSIHGDRWNHARSSGLKRTGKSCRLRWLNLYRPDVRNGNITLQEFMILKLSLWGNRWSKIAQYLPGRTDNEIKNYWRTRVQKQA                                                                                                                          |
| <i>Arabidopsis thaliana</i> | At1g22640         | At2R-MYB003 | KAHMNGAWTKEEDQLLDYIRKHGEGCWRSPLPRAAGLRCGKSCRLRWNYLRPDLKRGNFTEEDELIIKLSLGNKWSLIAGRLPGRTDNEIKNYWNTHIKRL                                                                                                                             |
| <i>Arabidopsis thaliana</i> | At4g38620         | At2R-MYB004 | KAHTNGAWTKEEDERLVAIYKAHGEWCWRSPLKAAAGLLRCGKSCRLRWNYLRPDLKRGNFTEEDELIIKLSLGNKWSLIAGRLPGRTDNEIKNYWNTHIRRKL                                                                                                                          |
| <i>Arabidopsis thaliana</i> | At3g13540         | At2R-MYB005 | KMGMKRGPWTEEDEILVSIKKEGEGWRSPLKRAAGLLRCGKSCRLRWNYLRPSVKRGGITSDEEDLILRLHRLGNRWSLIAGRIPGRTDNEIKNYWNTHLRKKL                                                                                                                          |
| <i>Arabidopsis thaliana</i> | At4g09460         | At2R-MYB006 | KAHTNGAWTKEEDQLLDYIRKHGEGCWRSPLKSAAGLLRCGKSCRLRWNYLRPDLKRGNFTEDEEDQIIKLSLGNKWSLIAGRLPGRTDNEIKNYWNTHIKRL                                                                                                                           |
| <i>Arabidopsis thaliana</i> | At2g16720         | At2R-MYB007 | KEHMNGAWTKEEDERLVSYIKSHGEGCWRSPLPRAAGLLRCGKSCRLRWNYLRPDLKRGNFTEDEDELIIKLSLGNKWSLIAARLPGRTDNEIKNYWNTHIKRL                                                                                                                          |
| <i>Arabidopsis thaliana</i> | At1g35515         | At2R-MYB008 | KAHMNGAWTKEEDQLLDYIRKHGEGCWRSPLKSAAGLLRCGKSCRLRWNYLRPDLKRGNFTEDEEDQIIKLSLGNKWSLIAGRLPGRTDNEIKNYWNTHIKRL                                                                                                                           |
| <i>Arabidopsis thaliana</i> | At5g16770         | At2R-MYB009 | ENGLKKGWTPQEEDDKLIDHIQKHGHSWRALPKQAGLNRCGKSCRLRWNYLRPDIKRGNFTEEEETIINLHSLGNKWSIAGNLPGRTDNEIKNYWNTHLRKKL                                                                                                                           |
| <i>Arabidopsis thaliana</i> | At3g12820         | At2R-MYB010 | KSQVKGWPSDEESERLRSFILKNGHQWRSPLKLAGLMRCGKSCRLRWNYLRPDLKRGNFTEEEDTIIHLHQA YGNKWSKIASNFPGRTDNEIKNVWNTHLKRL                                                                                                                          |
| <i>Arabidopsis thaliana</i> | At3g62610         | At2R-MYB011 | KVGIKKGRWTAEDRTLSDYIQSNGEWSRSLPKNAGLRCGKSCRLRWNYLRSDIKRGNITPEEEDVIVKLHSTLGTWRWSTIASNLPGRTDNEIKNYWNSHLRKL                                                                                                                          |
| <i>Arabidopsis thaliana</i> | At2g47460         | At2R-MYB012 | KVGIKRGRWTAEDQILSNYIQSNGEWSRSLPKNAGLRCGKSCRLRWNYLRSDIKRGNITPEEEDVIVKLHSTLGNRWSLIAGHLPGRTDNEIKNYWNSHLRKL                                                                                                                           |
| <i>Arabidopsis thaliana</i> | At1g06180         | At2R-MYB013 | KIGLKKGPWSAEEDRILINYLHGHGPNWRALPKLAGLLRCGKSCRLRWNYLRPDIKRGNFTEEEDTIIHLHQA YGNKWSKIASNFPGRTDNEIKNVWNTHLKRL                                                                                                                         |
| <i>Arabidopsis thaliana</i> | At2g31180         | At2R-MYB014 | KMGVKGWTPPEEDQILINYLHGHGPNWRALPKHAGLLRCGKSCRLRWNYLRPDIKRGNFTEEEDTIIHLHQA YGNKWSKIASNFPGRTDNEIKNVWNTHLKRL                                                                                                                          |
| <i>Arabidopsis thaliana</i> | At3g23250         | At2R-MYB015 | KMGLKRGWTPPEEDQILVSIHGHGPNWRALPKQAGLLRCGKSCRLRWNYLRPDIKRGNFTEEEDTIIHLHQA YGNKWSKIASNFPGRTDNEIKNVWNTHLKRL                                                                                                                          |
| <i>Arabidopsis thaliana</i> | At5g15310         | At2R-MYB016 | KLGLKKGWTPPEEDQKLLAYIEEHGHSWRSLPEKAGLHRCGKSCRLRWNYLRPDIKRGKFNQEEETIILHALLGNRWSAIAATHLPKRTDNEIKNYWNTHLKRL                                                                                                                          |
| <i>Arabidopsis thaliana</i> | At3g61250         | At2R-MYB017 | KIGLKKGPWTPPEEDVLVAHIKNGHGSWRTPKLAGLLRCGKSCRLRWNYLRPDIKRGKFNQEEETIILHALLGNRWSAIAAQLPGRTDNEIKNVWNTHLKRL                                                                                                                            |
| <i>Arabidopsis thaliana</i> | At4g25560         | At2R-MYB018 | GERHRKGLWSPEEDEKILRSFILSYHGSCTTVPKAGLQRNGKSCRLRWNYLRPGLKRDMSIAEEETITFHSSLGNKWSQIAKFLPGRTDNEIKNYWNSHLKLL                                                                                                                           |
| <i>Arabidopsis thaliana</i> | At5g52260         | At2R-MYB019 | KQRQRKGLWSPEEDQKLSFILSRGHACWTTVPILAGLQRNGKSCRLRWNYLRPGLKRGFSFEEEEETITLHSSLGNKWSRIAKYLPGRTDNEIKNYWNSYLLKRW                                                                                                                         |
| <i>Arabidopsis thaliana</i> | At1g66230         | At2R-MYB020 | KVGLKKGWTPPEEDRKLINFILTNQCCWRAVPKLSGLLRCGKSCRLRWNYLRPDLKRGLLSDYEEKMVIDLHSQLGNRWSKIASHLPGRTDNEIKNVWNTHLKRL                                                                                                                         |
| <i>Arabidopsis thaliana</i> | At3g27810         | At2R-MYB021 | EAEVRKGPWTEEDLILINIANHGDGVWNSLAKSAGLKRRTGKSCRLRWLNLYRPDVRNGNITPEEQIIMELHAKWGNRWSKIAKHLPGRTDNEIKNFWRTRIQKI                                                                                                                         |
| <i>Arabidopsis thaliana</i> | At5g40430         | At2R-MYB022 | KSDITKRWTESEDIKLEMVALEPKKWKVAKHFEGRTPKQCRERWHNHARPNVKKTTWSEEDQILIEVHKVIGAKWQISEQLPGRSYNNVKNHWNTTKRRVQ                                                                                                                             |
| <i>Arabidopsis thaliana</i> | At5g40330         | At2R-MYB023 | EHEYKGLWTVEEDKILMDYVNRTHGQGHWNRIAKKTGLKRCGKSCRLRWNYLSPNVNRGNFTDQEEDIIRLHKLGNRWSLIAKRVPGRTDNQVKNYWNTHLSKLL                                                                                                                         |
| <i>Arabidopsis thaliana</i> | At5g40350         | At2R-MYB024 | DAEVRKGPWTEEDLILINIANHGDGVWNSLAKSAGLKRRTGKSCRLRWLNLYRPDVRNGNITPEEQIIMELHAKWGNRWSKIAKHLPGRTDNEIKNFWRTRIQKI                                                                                                                         |
| <i>Arabidopsis thaliana</i> | At2g39880         | At2R-MYB025 | GKSKVKGWPLPEQDEALTRLVKMCGPRNWNLSRIGPGRSGKSCRLRWCNQLDPILKRPKPFDEEHMIMSQAQVGNKWSVIAKSLPGRTDNAIKNHWNSSNLRRKP                                                                                                                         |
| <i>Arabidopsis thaliana</i> | At3g13890         | At2R-MYB026 | KQVVRGLWSPEEDEKLINYSYHGHGCVSPKHAGLRCGKSCRLRWNYLRPDLKRGFSFQEAALIIELHSILGNRWAQIAKHLPGRTDNEIKNFVWNSIKKLL                                                                                                                             |
| <i>Arabidopsis thaliana</i> | At3g53200         | At2R-MYB027 | EETLRRGPWLEEDERLVKVISLLGERRWDSLAIVSGLKRSGKSCRLRWNYLNPTLKRGPMSQEEERIFQLHALWGNKWSKIAARRLPGRTDNEIKNYWRTHYRKKQ                                                                                                                        |
| <i>Arabidopsis thaliana</i> | At5g61420         | At2R-MYB028 | GEGLKKGAWTTEEDKLLSYIHDHGGWRDIPQKAGLRCGKSCRLRWNYLRPEIKRGEFSFEEEEQIIIMLHASRGNKWSVIARHLPRRTDNEIKNYWNTHLKRL                                                                                                                           |
| <i>Arabidopsis thaliana</i> | At5g07690         | At2R-MYB029 | GEGLKKGAWTAEEDKLLSYIHEHGGGWDRDIPQKAGLRCGKSCRLRWNYLRPEIKRGEFSFEEEEQIIIMLHASRGNKWSVIARHLPRRTDNEIKNYWNTHLKRL                                                                                                                         |
| <i>Arabidopsis thaliana</i> | At3g28910         | At2R-MYB030 | KGGVKGWTPPEEDILVYIQEHGPNWRVPTNTGLLRCSKSCRLRWNYLRPDIKRGNFTEHEEKMIVHLQALLGNRWAIAIYLPQRTDNDIKNYWNTHLKLL                                                                                                                              |
| <i>Arabidopsis thaliana</i> | At1g74650         | At2R-MYB031 | KIEVKGWTPPEEDILVSYIQHGGPNWRVPTANTGLLRCSKSCRLRWNYLRPDIKRGNFTEHEEKMIHLQALLGNRWAIAIYLPQRTDNDIKNYWNTHLKLL                                                                                                                             |
| <i>Arabidopsis thaliana</i> | At4g34990         | At2R-MYB032 | KDHTNGAWTKEEDKLLSYIAHGEWCWRSPLPRAAGLRCGKSCRLRWNYLRPDLKRGNFTEEEDLIIKLSLGNKWSLIATRLPGRTDNEIKNYWNTHVKRL                                                                                                                              |
| <i>Arabidopsis thaliana</i> | At5g06100         | At2R-MYB033 | GHALKKGWSSAEDDILIDYVNHGEGWNAVQKHTSLFRCGKSCRLRWANHLRPNLKKGAFSQEEELIIVELHAKMGNRWARMAAHLPGRTDNEIKNYWNTRIKRRQ                                                                                                                         |
| <i>Arabidopsis thaliana</i> | At5g60890         | At2R-MYB034 | EEGKKGAWTPEEDQKLLAYLHLHGGWRDIPQKAGLRCGKSCRLRWNYLRPDIKRGFSFPEEDTIIKLSLGNKWSVIAIATSLAGRTDNEIKNYWNTNLKRL                                                                                                                             |
| <i>Arabidopsis thaliana</i> | At3g28470         | At2R-MYB035 | KSNVKKGLWTEEDAKILAYVAIHGPNWVSLPKKAGLNRSGKSCRLRWNYLRPDLKHSFSTQEELIIECHRAIGSRWSSIAKRLPGRTDNDVKNHWNTKLLKLL                                                                                                                           |



|                             |           |             |                                                                                                                 |
|-----------------------------|-----------|-------------|-----------------------------------------------------------------------------------------------------------------|
| <i>Arabidopsis thaliana</i> | At5g57620 | At2R-MYB036 | KANVKKGPWSPEEDVKLDYIDKYGTGGNWIALPQKIGLRRCGKSCRLRWLNLYLRPNIKHGGFSEEDRIISL YISIGSRWSIIAAQLPGRTDNDIKNYWNTKLLKKL    |
| <i>Arabidopsis thaliana</i> | At5g23000 | At2R-MYB037 | KTKVKRGPWSPEEDSKLRDYIEKYGNNGNWISFPLKAGLRRCGKSCRLRWLNLYLRPNIKHGGFSEEDRIIFSLFAAIGSRWSIIAAHLPGRTDNDIKNYWNTKLLKKL   |
| <i>Arabidopsis thaliana</i> | At2g36890 | At2R-MYB038 | KANVVKRGPWSPEEDAKLDYIEKQGTGGNWIALPHKAGLRRCGKSCRLRWLNLYLRPNIRHGGDFTEEDNIIYSLFASIGSRWSVIAAHLQGRTDNDIKNYWNTKLLKKL  |
| <i>Arabidopsis thaliana</i> | At4g17780 | At2R-MYB039 | DKGVKKGPWLPPEEDDKLTA YINENGYGNWRSLPKLAGLRRCGKSCRLRWLNLYLRPNIRHGGDFTEEDNIIYSLFASIGSRWSVIAAHLQGRTDNDIKNYWNTKLLKKL |
| <i>Arabidopsis thaliana</i> | At5g14340 | At2R-MYB040 | KIGLRKPWTIEEDHRLMNFILNNGIHCWRIVPKLAGLRRCGKSCRLRWLNLYLRPNIRHGGDFTEEDNIIYSLFASIGSRWSVIAAHLQGRTDNDIKNYWNTKLLKKL    |
| <i>Arabidopsis thaliana</i> | At4g28110 | At2R-MYB041 | KNGVKKGPWTAEDQKLIDYIRFHGPGNWRTPKNAAGLRRCGKSCRLRWLNLYLRPNIRHGGDFTEEDNIIYSLFASIGSRWSVIAAHLQGRTDNDIKNYWNTKLLKKL    |
| <i>Arabidopsis thaliana</i> | At4g12350 | At2R-MYB042 | KLMVKKGPWTAEDDKLINFILTNHGCCWRALPKLAGLRRCGKSCRLRWLNLYLRPNIRHGGDFTEEDNIIYSLFASIGSRWSVIAAHLQGRTDNDIKNYWNTKLLKKL    |
| <i>Arabidopsis thaliana</i> | At5g16600 | At2R-MYB043 | KVGLKKGPWTIEEDKLLINFILTNHGCCWRALPKSGLLRRCGKSCRLRWLNLYLRPNIRHGGDFTEEDNIIYSLFASIGSRWSVIAAHLQGRTDNDIKNYWNTKLLKKL   |
| <i>Arabidopsis thaliana</i> | At5g67300 | At2R-MYB044 | MADRIKGPWSPEEDEQLRRLVVKYGPWNWTVISKIPGRSGKSCRLRWLNLYLRPNIRHGGDFTEEDNIIYSLFASIGSRWSVIAAHLQGRTDNDIKNYWNTKLLKKL     |
| <i>Arabidopsis thaliana</i> | At3g48920 | At2R-MYB045 | KEKQKGLWSPEEDEKLRSVLYKYGHCWSTIPLQAGLRRCGKSCRLRWLNLYLRPNIRHGGDFTEEDNIIYSLFASIGSRWSVIAAHLQGRTDNDIKNYWNTKLLKKL     |
| <i>Arabidopsis thaliana</i> | At5g12870 | At2R-MYB046 | VKKMKKGLWSPEEDSKLMQYMLSNQGQWSDVAKNAGLRRCGKSCRLRWLNLYLRPNIRHGGDFTEEDNIIYSLFASIGSRWSVIAAHLQGRTDNDIKNYWNTKLLKKL    |
| <i>Arabidopsis thaliana</i> | At1g18710 | At2R-MYB047 | VDGMKKGEWTAEDQKLGAYINEHGVCDWRSLPKRAGLRRCGKSCRLRWLNLYLRPNIRHGGDFTEEDNIIYSLFASIGSRWSVIAAHLQGRTDNDIKNYWNTKLLKKL    |
| <i>Arabidopsis thaliana</i> | At3g46130 | At2R-MYB048 | EEGNRKPWTEQEDILLVNFVHLFGDRRWFIAKVSGLNRTGKSCRLRWLNLYLRPNIRHGGDFTEEDNIIYSLFASIGSRWSVIAAHLQGRTDNDIKNYWNTKLLKKL     |
| <i>Arabidopsis thaliana</i> | At5g54230 | At2R-MYB049 | ESEVKKGPWTEPEDEKLVGYIQTGPGKWRTPKNAAGLRRCGKSCRLRWLNLYLRPNIRHGGDFTEEDNIIYSLFASIGSRWSVIAAHLQGRTDNDIKNYWNTKLLKKL    |
| <i>Arabidopsis thaliana</i> | At1g57560 | At2R-MYB050 | KQKLRKGLWSPEEDEKLLNYITKHGHCWSSVPKLAGLRRCGKSCRLRWLNLYLRPNIRHGGDFTEEDNIIYSLFASIGSRWSVIAAHLQGRTDNDIKNYWNTKLLKKL    |
| <i>Arabidopsis thaliana</i> | At1g18570 | At2R-MYB051 | ELGLKKGAWTEPEDEKLLSYLNRHGGWRTLPKAGLRRCGKSCRLRWLNLYLRPNIRHGGDFTEEDNIIYSLFASIGSRWSVIAAHLQGRTDNDIKNYWNTKLLKKL      |
| <i>Arabidopsis thaliana</i> | At1g17950 | At2R-MYB052 | MMCSRGHWRPAEDEKLRRELVEQFGPHNWNIAQKLSGRSGKSCRLRWLNLYLRPNIRHGGDFTEEDNIIYSLFASIGSRWSVIAAHLQGRTDNDIKNYWNTKLLKKL     |
| <i>Arabidopsis thaliana</i> | At5g65230 | At2R-MYB053 | ETGLKKGWLPPEEDKLLNYIHKHGHSSWSALPKLAGLRRCGKSCRLRWLNLYLRPNIRHGGDFTEEDNIIYSLFASIGSRWSVIAAHLQGRTDNDIKNYWNTKLLKKL    |
| <i>Arabidopsis thaliana</i> | At1g73410 | At2R-MYB054 | MIMCSRGHWRPAEDEKLRKDLVEQYGFPHNWNIAQKLSGRSGKSCRLRWLNLYLRPNIRHGGDFTEEDNIIYSLFASIGSRWSVIAAHLQGRTDNDIKNYWNTKLLKKL   |
| <i>Arabidopsis thaliana</i> | At4g01680 | At2R-MYB055 | KQKLRKGLWSPEEDEKLLRYITKYHGHGWSSVPKLAGLRRCGKSCRLRWLNLYLRPNIRHGGDFTEEDNIIYSLFASIGSRWSVIAAHLQGRTDNDIKNYWNTKLLKKL   |
| <i>Arabidopsis thaliana</i> | At5g17800 | At2R-MYB056 | TKVCSRGHWRPTEDAKLKVLAQFGPQWNLSNHLGRSGKSCRLRWLNLYLRPNIRHGGDFTEEDNIIYSLFASIGSRWSVIAAHLQGRTDNDIKNYWNTKLLKKL        |
| <i>Arabidopsis thaliana</i> | At3g01530 | At2R-MYB057 | EGTVRKPWTEPEDEKLLNYIHKHGHSSWSALPKLAGLRRCGKSCRLRWLNLYLRPNIRHGGDFTEEDNIIYSLFASIGSRWSVIAAHLQGRTDNDIKNYWNTKLLKKL    |
| <i>Arabidopsis thaliana</i> | At1g16490 | At2R-MYB058 | KTKVKRGPWSHDEDLKLISFIKNGHENWRSPLKAGLRRCGKSCRLRWLNLYLRPNIRHGGDFTEEDNIIYSLFASIGSRWSVIAAHLQGRTDNDIKNYWNTKLLKKL     |
| <i>Arabidopsis thaliana</i> | At5g59780 | At2R-MYB059 | QEEYRKPWTEQEDILLVNFVHLFGDRRWFIAKVSGLNRTGKSCRLRWLNLYLRPNIRHGGDFTEEDNIIYSLFASIGSRWSVIAAHLQGRTDNDIKNYWNTKLLKKL     |
| <i>Arabidopsis thaliana</i> | At1g08810 | At2R-MYB060 | KIGIKKGPWTEPEDEKLLVSYIQEHGPGNWRVPTNTGLLRCSKSCRLRWLNLYLRPNIRHGGDFTEEDNIIYSLFASIGSRWSVIAAHLQGRTDNDIKNYWNTKLLKKL   |
| <i>Arabidopsis thaliana</i> | At1g09540 | At2R-MYB061 | KQKLRKGLWSPEEDEKLLTHITNHGHCWSSVPKLAGLRRCGKSCRLRWLNLYLRPNIRHGGDFTEEDNIIYSLFASIGSRWSVIAAHLQGRTDNDIKNYWNTKLLKKL    |
| <i>Arabidopsis thaliana</i> | At1g68320 | At2R-MYB062 | DEELRRGPWTEPEDEKLLTNYILHNGEGRWNHVAKAGLRRCGKSCRLRWLNLYLRPNIRHGGDFTEEDNIIYSLFASIGSRWSVIAAHLQGRTDNDIKNYWNTKLLKKL   |
| <i>Arabidopsis thaliana</i> | At1g79180 | At2R-MYB063 | KTKVKRGPWSPEEDIKLISFIKNGHENWRSPLKAGLRRCGKSCRLRWLNLYLRPNIRHGGDFTEEDNIIYSLFASIGSRWSVIAAHLQGRTDNDIKNYWNTKLLKKL     |
| <i>Arabidopsis thaliana</i> | At5g11050 | At2R-MYB064 | YKNIKQWTADEDRKLIKLVMQHGERKWA VISEKLEGRAGKQCRERWHNHLRPDIKDSWSEEEERLLVEAHRIGNKWA EIAKLIQGRTEENSIGNHNWNTKRRQN      |
| <i>Arabidopsis thaliana</i> | At3g11440 | At2R-MYB065 | RSVLKKGWTEPEDEKLLIDYVKKHGGWNAVQKHTSLARCAGKSCRLRWLNLYLRPNIRHGGDFTEEDNIIYSLFASIGSRWSVIAAHLQGRTDNDIKNYWNTKLLKKL    |
| <i>Arabidopsis thaliana</i> | At5g14750 | At2R-MYB066 | NNEYKGLWTEPEDEKLLMDYVKAHGKGHWNRIAKTGLKRCGKSCRLRWLNLYLRPNIRHGGDFTEEDNIIYSLFASIGSRWSVIAAHLQGRTDNDIKNYWNTKLLKKL    |
| <i>Arabidopsis thaliana</i> | At3g12720 | At2R-MYB067 | KHKVKRGLWSPEEDEKLLRYITTHGHSWSSVPKLAGLRRCGKSCRLRWLNLYLRPNIRHGGDFTEEDNIIYSLFASIGSRWSVIAAHLQGRTDNDIKNYWNTKLLKKL    |
| <i>Arabidopsis thaliana</i> | At5g65790 | At2R-MYB068 | KANVKKGPWSPEEDAKLDYIENSGTGGNWIALPQKIGLRRCGKSCRLRWLNLYLRPNIKHGGFSEEDNIIYSLFASIGSRWSVIAAHLQGRTDNDIKNYWNTKLLKKL    |
| <i>Arabidopsis thaliana</i> | At4g33450 | At2R-MYB069 | KPSCQRGHWRPVEDDNLRLVQYGPKNWFIAQHLVGRSGKSCRLRWLNLYLRPNIRHGGDFTEEDNIIYSLFASIGSRWSVIAAHLQGRTDNDIKNYWNTKLLKKL       |
| <i>Arabidopsis thaliana</i> | At2g23290 | At2R-MYB070 | EMDRKGPWSPEEDDLLQSLVQKHGPRNWSLISKIPGRSGKSCRLRWLNLYLRPNIRHGGDFTEEDNIIYSLFASIGSRWSVIAAHLQGRTDNDIKNYWNTKLLKKL      |
| <i>Arabidopsis thaliana</i> | At3g24310 | At2R-MYB071 | EEGWRKGPWTAEDRLLIDYVQLHGEGRWNSVARLAGLRRCGKSCRLRWLNLYLRPNIRHGGDFTEEDNIIYSLFASIGSRWSVIAAHLQGRTDNDIKNYWNTKLLKKL    |
| <i>Arabidopsis thaliana</i> | At1g56160 | At2R-MYB072 | KNKVKRGPWSPQEDLTLITFIQKHGQNWRSPLKAGLRRCGKSCRLRWLNLYLRPNIRHGGDFTEEDNIIYSLFASIGSRWSVIAAHLQGRTDNDIKNYWNTKLLKKL     |
| <i>Arabidopsis thaliana</i> | At4g37260 | At2R-MYB073 | NMERIKGPWSPEEDDLLQSLVQKHGPRNWSLISKIPGRSGKSCRLRWLNLYLRPNIRHGGDFTEEDNIIYSLFASIGSRWSVIAAHLQGRTDNDIKNYWNTKLLKKL     |
| <i>Arabidopsis thaliana</i> | At4g05100 | At2R-MYB074 | KNGLRKGPWTEPEDEKLLIDYINIHGYGNWRTPKNAAGLRRCGKSCRLRWLNLYLRPNIRHGGDFTEEDNIIYSLFASIGSRWSVIAAHLQGRTDNDIKNYWNTKLLKKL  |
| <i>Arabidopsis thaliana</i> | At1g56650 | At2R-MYB075 | SKGLRKGAWTEEDSLLRQCINKYGEKWHQVVPVAGLRRCRCSKSCRLRWLNLYLRPNIRHGGDFTEEDNIIYSLFASIGSRWSVIAAHLQGRTDNDIKNYWNTKLLKKL   |
| <i>Arabidopsis thaliana</i> | At5g07700 | At2R-MYB076 | GEGLKKGAWTEEDKLLISYIHDHGGGWRDPEKAGLRRCGKSCRLRWLNLYLRPNIRHGGDFTEEDNIIYSLFASIGSRWSVIAAHLQGRTDNDIKNYWNTKLLKKL      |
| <i>Arabidopsis thaliana</i> | At3g50060 | At2R-MYB077 | MADRKGPWSPEEDEQLRRMVEKYGPWNWVAISKIPGRSGKSCRLRWLNLYLRPNIRHGGDFTEEDNIIYSLFASIGSRWSVIAAHLQGRTDNDIKNYWNTKLLKKL      |
| <i>Arabidopsis thaliana</i> | At5g49620 | At2R-MYB078 | EMDVRKGPWTEPEDEKLLINYLASHGEGRWNSLARCAGLRRCGKSCRLRWLNLYLRPNIRHGGDFTEEDNIIYSLFASIGSRWSVIAAHLQGRTDNDIKNYWNTKLLKKL  |
| <i>Arabidopsis thaliana</i> | At4g13480 | At2R-MYB079 | MVEEVWRKGPWTAEDRLLIEYVRVHGEGRWNSVSKLAGLRRCGKSCRLRWLNLYLRPNIRHGGDFTEEDNIIYSLFASIGSRWSVIAAHLQGRTDNDIKNYWNTKLLKKL  |
| <i>Arabidopsis thaliana</i> | At5g56110 | At2R-MYB080 | KENVKRGQWTEPEDEKLLSYAQHGRNWRPLKAGLRRCGKSCRLRWLNLYLRPNIRHGGDFTEEDNIIYSLFASIGSRWSVIAAHLQGRTDNDIKNYWNTKLLKKL       |

|                             |           |             |                                                                                                                   |
|-----------------------------|-----------|-------------|-------------------------------------------------------------------------------------------------------------------|
| <i>Arabidopsis thaliana</i> | At2g26960 | At2R-MYB081 | KKSFTKGPWTQAEDNLLIAYVDKHGDNWNAVQNNGLSRCGKSCRLRWVNHLPDLKKGAFTEKEEKRVIELHALLGNKWARMAEELPGRTDNEIKNFWNTRLKRLQ         |
| <i>Arabidopsis thaliana</i> | At5g52600 | At2R-MYB082 | KSYVVRGLWKPEEDMILKSYVETHGEGNWADISRRSGLKRGKSCRLRWKNYLRPNIKRGSMSPEQDLIIRMHKLLGNRWSLIAGRLPGRTDNEVKNYWNTHLNKKP        |
| <i>Arabidopsis thaliana</i> | At3g08500 | At2R-MYB083 | KPKLRKGLWSPDEDEKLIRYMLTNGQGCSWDIARNAGLLRCGKSCRLRWNYLRPDLKRGFSFQEEEDLIFHLHSILGNRWSQIATRLPGRTDNEIKNFWNSTLKKRL       |
| <i>Arabidopsis thaliana</i> | At3g49690 | At2R-MYB084 | KANVKKGPWSPPEEDAKLKSYSIENGSTGGNWIALPQKIGLKRCKGKSCRLRWNYLRPNIKHGGFSEEEENIICSLYLITIGSRWSIIAQLPGRTDNDIKNYWNTRLKKKL   |
| <i>Arabidopsis thaliana</i> | At4g22680 | At2R-MYB085 | KLGVKKGPWTVVEEDKLLINFILTNHGCCWRALPKLAGLRRCGKSCRLRWNYLRPDLKRGLLSHDEEQLVIDLHANLGNKWSKIASRLPGRTDNEIKNHNWTHIKKKL      |
| <i>Arabidopsis thaliana</i> | At5g26660 | At2R-MYB086 | KQKLRKGLWSPPEEDKLLNYITRHGHGCWSSVPKLAGLQRCGKSCRLRWNYLRPDLKRGAFSQDEESLIELHAALGNRWSQIATRLPGRTDNEIKNFWNSLKKKL         |
| <i>Arabidopsis thaliana</i> | At4g37780 | At2R-MYB087 | KMAVKKGPWSTEEDA VLKSYIEKHGTGNWISLPQRIGIKRCGKSCRLRWNYLRPNLKHGGFTDEEDYIICSLYITIGSRWSIIASQLPGRTDNDIKNYWNTRLKKKL      |
| <i>Arabidopsis thaliana</i> | At2g02820 | At2R-MYB088 | KKERHIVTWSPEEDDILRKQISLQGTENWAIASKFNDKSTRQRRRWYTYLNSDFKRGGSPEEDTLLCEAQRFLGNRWTEIAKVVSGRTDNAVKNRFTTLCKKRA          |
| <i>Arabidopsis thaliana</i> | At5g39700 | At2R-MYB089 | KKKHRGGHWLSEDLKELVA VFGPQNWKFIFGKMEPRTSLSCRQRFNQLDPKINKRNFTEEEELKRAHILYGNKWSKIAKLFNRRTDHAVKNHWHSLMNRRI            |
| <i>Arabidopsis thaliana</i> | At1g66390 | At2R-MYB090 | SKGLRKGAWTAEDSLLRLCIDKYGEGKWHQVPLRAGLNRCRCKSCRLRWNYLRPKSIKRGRLSNDEVDLLRLHKLGNRWSLIAGRLPGRTDNDIKNYWNTHLSKKH        |
| <i>Arabidopsis thaliana</i> | At2g37630 | At2R-MYB091 | MKERQRWSGEEDALLRAYVRFQGPREWHLVSERMNKPLNRDAKSCLERWKNYLKPGIKKGSLEEEQRLVIRLQEKHGNKWKIAAEVPGRTAKRLGKWWVEVFEKQKQ       |
| <i>Arabidopsis thaliana</i> | At5g10280 | At2R-MYB092 | DSGLKKGWTPDEDEKLVNYVQKHGHSWRALPKLAGLNRCGKSCRLRWNYLRPDIKRGFSFDEEQITLNLHSVLGNKWSSTIANQLPGRTDNEIKNFWNTHLKKKL         |
| <i>Arabidopsis thaliana</i> | At1g34670 | At2R-MYB093 | ENGLKKGWTPDEEDKLDYIHKHGHGWSRALPKLADLNRCGKSCRLRWNYLRPDIKRGKFSAEEEQITLHLHSILGNKWSAIAATHLQGRTDNEIKNFWNTHLKKKL        |
| <i>Arabidopsis thaliana</i> | At3g47600 | At2R-MYB094 | KIGVKKGPWTPDEEIIIVSYIQEHGPGNWRVPTHTGLRRCCKSCRLRWNYLRPGIKRGNFTEHEEKMLHLQALLGNRWAAIASYLPERTDNDIKNYWNTHLKKKL         |
| <i>Arabidopsis thaliana</i> | At1g74430 | At2R-MYB095 | VDGLRKGWTAEDRKL VVYINEHGLGEWGLPKRAGLQRCGKSCRLRWNYLRPGIKRGNFTEHEEKMLHLQALLGNRWAAIAKQMPNRDNDIKNHNWNSLKKRL           |
| <i>Arabidopsis thaliana</i> | At5g62470 | At2R-MYB096 | KIGVKKGPWTPDEEIIIVSYIQEHGPGNWRVPTHTGLRRCCKSCRLRWNYLRPGIKRGNFTEHEEKTIIVHLQALLGNRWAAIASYLPERTDNDIKNYWNTHLKKKL       |
| <i>Arabidopsis thaliana</i> | At4g26930 | At2R-MYB097 | GVVLKKGWTPVAEDELAA YVREYEGGNWNSVQKKTWLARCGKSCRLRWANHLRPNLRKGSFTPEEERLIQLHSQGNKWARMAAQLPGRTDNEIKNYWNTRLKRFQ        |
| <i>Arabidopsis thaliana</i> | At4g18770 | At2R-MYB098 | KSTLVKGGWTAEDRVLQLVEKYGLRKWSHIAQVLPGRIGKQCRERWHNHLRDPDIKKTETWSEEDRVLIEFHKEIGNKWAEIAKRLPGRTESENKHNWNTKRRQF         |
| <i>Arabidopsis thaliana</i> | At5g62320 | At2R-MYB099 | EVGLRKGWTPVEEDGKLVDFLRARGNCGGGGGWCWRDVPKLAGLRRCGKSCRLRWNYLRPDLKRGFLTEEEIQLVIDLHARLGNRWSKIAVELPGRTDNDIKNYWNTHIKRKL |
| <i>Arabidopsis thaliana</i> | At2g25230 | At2R-MYB100 | KSDIDKVNWTESEDIKLKEIMALGPKNKWTKVAKKFEGRGTGKQCRERWYNHARPNIKKTA WSEEDQILIEAHKVLGKWWVEIAQQLPGRSDNNIKNHNWNTTKRRVQ     |
| <i>Arabidopsis thaliana</i> | At2g32460 | At2R-MYB101 | GRGLKKGWTPTTEDAILTEYVRKHGEGNWNAVQKNSGLLRGKSCRLRWANHLRPNLKGSTPDEEKIIDLHAKLGNKWARMASQLPGRTDNEIKNYWNTRMKRRQ          |
| <i>Arabidopsis thaliana</i> | At4g21440 | At2R-MYB102 | KNGLKKGWTPSEEDQKLVDIYQKHGYNWRTLPKNAGLQRCGKSCRLRWNYLRPDIKRGFSFEEETIQLHSFLGNKWSAIAARLPGRTDNEIKNFWNTHIRKKL           |
| <i>Arabidopsis thaliana</i> | At1g63910 | At2R-MYB103 | QQKVKRGLWSPDEDEKLIRYITTHGYGCWSEVPEKAGLQRCGKSCRLRWNYLRPDIRRGRFSPEEELIISLHG VVGNRWAHIASHLPGRTDNEIKNYWNSWIKKKI       |
| <i>Arabidopsis thaliana</i> | At2g26950 | At2R-MYB104 | KKTFTKSKWPEEDRILKDYVIQYGDRTWTHVPKRTGLPHNPASCFRFRWNNHLKPSLKKGPFTDEEERVLQLHAVLGNKWSQMAREFPGRTDNEIKNFWNARRMRLK       |
| <i>Arabidopsis thaliana</i> | At1g69560 | At2R-MYB105 | KASVSRGHWRPAEDTKLKLVA VYGPQWNLIAEKLQGRSGKSCRLRWFNQLDPRINRRAFTEEEERLMQAHRLYGNKWAMIARLPGRTDNSVKNHWHVIMARKF          |
| <i>Arabidopsis thaliana</i> | At3g01140 | At2R-MYB106 | KAGLKKGWTPDEEDQKLLAYIEEHGHGWSRSLPEKAGLQRCGKSCRLRWNYLRPDIKRGKFTVQEEQITLHALLGNRWSAIAATHLPKRTDNEIKNYWNTHLKKRL        |
| <i>Arabidopsis thaliana</i> | At3g02940 | At2R-MYB107 | ESGLKKGWTPDEEDQKLNHIRKHGHGWSRALPKAQLNRCGKSCRLRWNYLRPDIKRGNFTEEEETIINLHSLGNKWSIAGHLPGRTDNEIKNYWNTHIRKKL            |
| <i>Arabidopsis thaliana</i> | At3g06490 | At2R-MYB108 | EMDLKRGWTAEDFKLMNYIATNGEGRWNSLRACGLQRTGKSCRLRWNYLRPDRRGNITLLEQLLILELHRSRWGNRWSKIAQYLPGRTDNEIKNYWRTRVQKHA          |
| <i>Arabidopsis thaliana</i> | At3g55730 | At2R-MYB109 | IRSKVKGWSTEEDA VLTKLVRKLGPRNWSLIARGIPGRSGKSCRLRWCNQLDPLKRPFSDEEDRMIISAHAVHGNKWA VIAKLLTGRTDNAIKNHNWNTLRRKY        |
| <i>Arabidopsis thaliana</i> | At3g29020 | At2R-MYB110 | SRVCSRGHWRISEDQLMELVS VYGPQWNHIAESMQGRTGKSCRLRWFNQLDPRINKRAFSDEEEERLLAAHRAFGNKWAMIARLPGRTDNALKNHWHVLMARKM         |
| <i>Arabidopsis thaliana</i> | At5g49330 | At2R-MYB111 | KIGLKRGRWTAEEDEILTKYIQTNGEGSWRSLPKAGLLRCGKSCRLRWNYLRDLKRGNTSDEEEIIVKLHSLGNRWSLIATHLPGRTDNEIKNYWNSHLSRRI           |
| <i>Arabidopsis thaliana</i> | At1g48000 | At2R-MYB112 | EIEIRRGWTPVEEDMKLVS YISLHGEGRWNSLSRSAGLNRTGKSCRLRWNYLRPDIRRDISLQEQFILELHRSRWGNRWSKIAQHLPGRTDNEIKNYWRTRVQKHA       |
| <i>Arabidopsis thaliana</i> | At1g66370 | At2R-MYB113 | PKGLRKGWTPTEEDILLRQCIDKYGEGKWHR VPLRTGLNRCRCKSCRLRWNYLRPKSIKRGKLCSEVDL VLRLHKLGNRWSLIAGRLPGRTDNDIKNYWNTHLSKKH     |
| <i>Arabidopsis thaliana</i> | At1g66380 | At2R-MYB114 | SKGLRKGAWTAEDSLLRQCIGKYGEGKWHQVPLRAGLNRCRCKSCRLRWNYLRPKSIKRGKFSDEVDLLRLHKLGNRWSLIAGRLPGRTDNDIKNYWNTHLSKKH         |
| <i>Arabidopsis thaliana</i> | At5g40360 | At2R-MYB115 | KDIIGKQWTPTEDELLVRMVKSKGTKNWTSIAKMFQGRVKGQCRERWHNHLRPNIKKNDWSEEDQILIEVHKIVGNKWTEIAKRLPGRSENIIVKNHNWNTKRRKH        |
| <i>Arabidopsis thaliana</i> | At1g25340 | At2R-MYB116 | GAEQRKGWTPLEEDTLLTNYISHNGEGRWNLLAKSSGLKRGKSCRLRWNYLRPDIKRGNTLPEEQILLILELHSGWGNRWSKISKYLPGRTDNDIKNYWRTRVQKQA       |
| <i>Arabidopsis thaliana</i> | At1g26780 | At2R-MYB117 | PSVLGRGHWRPAEDVKLKL VSIYGPQWNHIAEKLQGRSGKSCRLRWFNQLDPRINRRAFTEEEERLMQAHRLYGNKWAMIARLPGRTDNSVKNHWHVVMARKY          |
| <i>Arabidopsis thaliana</i> | At3g27780 | At2R-MYB118 | KASIIKQWTPDEEDKLLVQLVDLHGTTKWSQIAKMLQGRVKGQCRERWHNHLRDPDIKDGWTEEDIIILIAKHEIGNRWAEIARKLPGRTEENTIKNHNWNTKRRQH       |
| <i>Arabidopsis thaliana</i> | At5g58850 | At2R-MYB119 | SKNLIKQWTAEDRKLRLVRQHGERKWAMISEKLEGRAGKQCRERWHNHLRDPDIKDGWSEEEERVLVESHMRIGNKWAEIAKLPGRTESENKHNWNTKRRQN            |
| <i>Arabidopsis thaliana</i> | At5g55020 | At2R-MYB120 | GVILKKGWTPAAEDELAA YVRENGEGNWNAVQKNTGLARCGKSCRLRWANHLRPNLKGSTFGDEERLIQLHAQLGNKWARMAAQLPGRTDNEIKNYWNTRLKRL         |
| <i>Arabidopsis thaliana</i> | At3g30210 | At2R-MYB121 | QQGCRKGWTPLEEDKLLAEYVTSHGEGRWSTVAKCAGLNRSKSCRLRWNYLRPGLKRGQITPQEEIILELHSLWGNKWSSTIARYLPGRTDNEIKNYWRTHYKKNQ        |
| <i>Arabidopsis thaliana</i> | At1g74080 | At2R-MYB122 | AEGLKKGAWTQEEQKLIAYVQRHGEGRWRTLPDKAGLKRCKGKSCRLRWANYLRPDIKRGFSQDEEDSIINLHAIHGNKWSAIARKIPRRTDNEIKNHNWNTHIKKL       |
| <i>Arabidopsis thaliana</i> | At5g35550 | At2R-MYB123 | REELNRGAWTDHEDKILRDYITTHGEGKWLTPNQAQGLKRCGKSCRLRWKNYLRPGIKRGNISSEEEIIRLHNLGNRWSLIAGRLPGRTDNEIKNHNWNSNLRKRL        |
| <i>Arabidopsis thaliana</i> | At1g14350 | At2R-MYB124 | KKERHIVTWSQEEDEVILREQITLHGTEWAIASKFKDKSTRQRRRWYTYLNSDFKRGGSPEEDMLLCEAQRVFGNWRWTEIAKVVSGRTDNAVKNRFTTLCKKRA         |

|                                 |                    |             |                                                                                                                     |
|---------------------------------|--------------------|-------------|---------------------------------------------------------------------------------------------------------------------|
| <i>Arabidopsis thaliana</i>     | At3g60460          | At2R-MYB125 | KEEIKKGPWKAEEDEVLINHVKRYGPRDWSSIRSKGLLQRTGKSCRLRWVWVKLRPNLKNCKFSADEERTVIELQSEFGNKWARIATYLPGRTDNDVKNFWSRQKRLA        |
| <i>Arabidopsis thaliana</i>     | AT1G09770          | AtCDC5      | MRIMIKGGVWKNTEDEILKAAVMKYGKNQWARISSLLVRKSAKQCKARWYEWLDPISIKKTEWTREEDEKLLHLAKLLPTQWRTIPIVGRTPSQCLERYEKLLDAAC         |
| <i>Arabidopsis thaliana</i>     | AT4G32730.1        | At3R-MYB1   | ARRSTKQWTPPEDEVLCMAVERFQGNWKKIAECFKDRTDVQCLHRWQKVLNPELVKGPWSKEEDNTIIDLVEKYGPKKWTISQHLPRIGKQCRERWHNHLNPGINKNAW       |
| <i>Arabidopsis thaliana</i>     | AT4G00540.1        | At3R-MYB2   | TQEEELTLIRAHQIYGNKWAEMLKFLPGRSDNSIKNHWNSSVKKKL                                                                      |
| <i>Arabidopsis thaliana</i>     | AT3G09370.1        | At3R-MYB3   | TRRSTKGGWTAEEEDQILTNVVKYQGRNWKRIAECLPGSEENRRNDVQCQHRWLKVLDPQLKGAWKKEEDELSELVKDYMENDRPPWSKISKELPGRIGKQCRERWHNHL      |
| <i>Arabidopsis thaliana</i>     | AT5G11510.1        | At3R-MYB4   | NPTIISKPWTTREEELILVQAQRGNGNKWAEIAKLLPGRTENNIKNHWNCSVKKRL                                                            |
| <i>Arabidopsis thaliana</i>     | AT5G02320.1        | At3R-MYB5   | PIRRAKGGWTPPEEDELTRQAVDTFKGKSWKNIKAFSPDRTEVQCLHRWQKVLNPDLIKGPWTHEEDEKIVELVEKYGPAKWSIIAQLPGRIGKQCRERWHNHLNPDINKDAWTT |
| <i>Populus trichocarpa</i> v3.0 | Potri.001G139900.1 | Pt2R-MYB001 | EEEVALMNAHRSHGNKWAIEIAKVLPGRTDNAIKNHWNSSLKKKS                                                                       |
| <i>Populus trichocarpa</i> v3.0 | Potri.001G005100.1 | Pt2R-MYB002 | ARRSTRGQWTAEEDEILRKA VHSFKGKNWKKIAEYFKDRTDVQCLHRWQKVLNPELVKGPWTKEEDEMIVQLIEKYGPKKWTIARFLPGRIGKQCRERWHNHLNPAINKEAW   |
| <i>Populus trichocarpa</i> v3.0 | Potri.001G036000.1 | Pt2R-MYB003 | TQEEELLLIRAHQIYGNRWAECLKFLPGRSDNGIKNHWHSSVKKKL                                                                      |
| <i>Populus trichocarpa</i> v3.0 | Potri.001G118800.1 | Pt2R-MYB004 | PMRRAKGGWTPPEEDELTRRAVEK YKGRKWKIAEFFPERTEVQCLHRWQKVLNPELVKGPWTQEEDDKIVELVKKYGPAKWSVIAKSLPGRIGKQCRERWHNHLNPGIRKDA   |
| <i>Populus trichocarpa</i> v3.0 | Potri.001G099800.1 | Pt2R-MYB005 | WTVEESALMNSHRMYGNKWAIEIAKVLPGRTDNAIKNHWNSSLKKKL                                                                     |
| <i>Populus trichocarpa</i> v3.0 | Potri.001G086700.1 | Pt2R-MYB006 | GSDFKKGWTPPEEDELVDYIKRNGHENWKALPKLAGLNRCGKSCRLRWNTYLRPDIKRGKFSSEEEERVIVNLHSLVGNKWSRIANHLPGRTDNEIKNFWNTHIRKKL        |
| <i>Populus trichocarpa</i> v3.0 | Potri.001G075400.1 | Pt2R-MYB007 | KVGLKRGWTPPEEDELVNYIKKEGEGRWRTLPKAGLLRCGKSCRLRWVWVKLRPNLKNCKFSADEERTVIELQSEFGNKWARIATYLPGRTDNDVKNFWSRQKRLA          |
| <i>Populus trichocarpa</i> v3.0 | Potri.001G169600.1 | Pt2R-MYB008 | KVGLKRGWTPPEEDELVNYIKKEGEGRWRTLPKAGLLRCGKSCRLRWVWVKLRPNLKNCKFSADEERTVIELQSEFGNKWARIATYLPGRTDNDVKNFWSRQKRLA          |
| <i>Populus trichocarpa</i> v3.0 | Potri.001G197000.1 | Pt2R-MYB009 | GGVLLKKGWTPPEEDELVNYIKKEGEGRWRTLPKAGLLRCGKSCRLRWVWVKLRPNLKNCKFSADEERTVIELQSEFGNKWARIATYLPGRTDNDVKNFWSRQKRLA         |
| <i>Populus trichocarpa</i> v3.0 | Potri.001G224500.1 | Pt2R-MYB010 | KLGVKKGWTPPEEDELVNYIKKEGEGRWRTLPKAGLLRCGKSCRLRWVWVKLRPNLKNCKFSADEERTVIELQSEFGNKWARIATYLPGRTDNDVKNFWSRQKRLA          |
| <i>Populus trichocarpa</i> v3.0 | Potri.001G235500.1 | Pt2R-MYB011 | QKQVVRGLWSPEEDELIRYITTHGYGCWSEVPEKAGLQRCGKSCRLRWVWVKLRPNLKNCKFSADEERTVIELQSEFGNKWARIATYLPGRTDNDVKNFWSRQKRLA         |
| <i>Populus trichocarpa</i> v3.0 | Potri.001G250000.1 | Pt2R-MYB012 | KVGLYRGPWTTKEDTLLINYIAHGEHGRWRLPKAGLLRCGKSCRLRWVWVKLRPNLKNCKFSADEERTVIELQSEFGNKWARIATYLPGRTDNDVKNFWSRQKRLA          |
| <i>Populus trichocarpa</i> v3.0 | Potri.001G258700.1 | Pt2R-MYB013 | QKQVVRGLWSPEEDELIRYITTHGYGCWSEVPEKAGLQRCGKSCRLRWVWVKLRPNLKNCKFSADEERTVIELQSEFGNKWARIATYLPGRTDNDVKNFWSRQKRLA         |
| <i>Populus trichocarpa</i> v3.0 | Potri.001G267300.1 | Pt2R-MYB014 | MPNKGAWTAEEEDRKLAEVIATHGAKRWRTIASKAALNRCGKSCRLRWVWVKLRPNLKNCKFSADEERTVIELQSEFGNKWARIATYLPGRTDNDVKNFWSRQKRLA         |
| <i>Populus trichocarpa</i> v3.0 | Potri.001G300200.1 | Pt2R-MYB015 | KQKVKRGLWSPEEDELIRYITTHGYGCWSEVPEKAGLQRCGKSCRLRWVWVKLRPNLKNCKFSADEERTVIELQSEFGNKWARIATYLPGRTDNDVKNFWSRQKRLA         |
| <i>Populus trichocarpa</i> v3.0 | Potri.001G347200.1 | Pt2R-MYB016 | ITPLKKGWTPPEEDELIRYITTHGYGCWSEVPEKAGLQRCGKSCRLRWVWVKLRPNLKNCKFSADEERTVIELQSEFGNKWARIATYLPGRTDNDVKNFWSRQKRLA         |
| <i>Populus trichocarpa</i> v3.0 | Potri.001G336700.1 | Pt2R-MYB017 | GSSGEKLPGRTDNEIKNYWNTTRTKRLQ                                                                                        |
| <i>Populus trichocarpa</i> v3.0 | Potri.001G408700.1 | Pt2R-MYB018 | QDEIRKGPWTEKEDILLINFVHLFGDRRWDIAKVSGLNRTGKSCRLRWVWVKLRPNLKNCKFSADEERTVIELQSEFGNKWARIATYLPGRTDNDVKNFWSRQKRLA         |
| <i>Populus trichocarpa</i> v3.0 | Potri.001G470500.1 | Pt2R-MYB019 | QWTEEDRKLIRLVKQFVGRKWAQIAEKLDGRAGKQCRERWHNHLRDPDKVSSPFTSSRKDSWSEEEERIMVGAHAKVGNRWAEIAKLPGRTEINAIKNHWNATKRRQN        |
| <i>Populus trichocarpa</i> v3.0 | Potri.002G038500.1 | Pt2R-MYB020 | SNKFKKGLWSPEEEDKLMNYLNNQGCWSDVARNAGLQRCGKSCRLRWVWVKLRPNLKNCKFSADEERTVIELQSEFGNKWARIATYLPGRTDNDVKNFWSRQKRLA          |
| <i>Populus trichocarpa</i> v3.0 | Potri.002G073500.1 | Pt2R-MYB021 | RAKLRKGLWSPEEDELIRYITTHGYGCWSEVPEKAGLQRCGKSCRLRWVWVKLRPNLKNCKFSADEERTVIELQSEFGNKWARIATYLPGRTDNDVKNFWSRQKRLA         |
| <i>Populus trichocarpa</i> v3.0 | Potri.002G096800.1 | Pt2R-MYB022 | MDCDRVKGWSPPEEDALLKHLVIKHGPRSWMIARA VPGRSGKSCRLRWVWVKLRPNLKNCKFSADEERTVIELQSEFGNKWARIATYLPGRTDNDVKNFWSRQKRLA        |
| <i>Populus trichocarpa</i> v3.0 | Potri.002G113700.1 | Pt2R-MYB023 | KSQVIKQWTPQEDRLLVQSVKQYGIKQWQIAKMLLEGRVKGQCRERWHNHLRDPDKDAWSEEEDELINAHREIGNRWAEIAKRLPGRTEINIKNHWNATKRRQF            |
| <i>Populus trichocarpa</i> v3.0 | Potri.002G122600.1 | Pt2R-MYB024 | KVGLKRGWTPPEEDELIRYITTHGYGCWSEVPEKAGLQRCGKSCRLRWVWVKLRPNLKNCKFSADEERTVIELQSEFGNKWARIATYLPGRTDNDVKNFWSRQKRLA         |
| <i>Populus trichocarpa</i> v3.0 | Potri.002G128900.1 | Pt2R-MYB025 | KNGLKKGWTPPEEEDKLLISYIQKHGHRWRLPKNAGLRCGKSCRLRWVWVKLRPNLKNCKFSADEERTVIELQSEFGNKWARIATYLPGRTDNDVKNFWSRQKRLA          |
| <i>Populus trichocarpa</i> v3.0 | Potri.002G140900.1 | Pt2R-MYB026 | KDNVVRGQWTPPEEDNKLSSYIAQHGTNRWRLPKNAGLQRCGKSCRLRWVWVKLRPNLKNCKFSADEERTVIELQSEFGNKWARIATYLPGRTDNDVKNFWSRQKRLA        |
| <i>Populus trichocarpa</i> v3.0 | Potri.002G173900.1 | Pt2R-MYB027 | KMGLKRGWTPPEEDELIRYITTHGYGCWSEVPEKAGLQRCGKSCRLRWVWVKLRPNLKNCKFSADEERTVIELQSEFGNKWARIATYLPGRTDNDVKNFWSRQKRLA         |
| <i>Populus trichocarpa</i> v3.0 | Potri.002G185900.1 | Pt2R-MYB028 | STACPRGHWRAEEDDKLRQLVEQYGAQNWNDAIEKLQGRSGKSCRLRWVWVKLRPNLKNCKFSADEERTVIELQSEFGNKWARIATYLPGRTDNDVKNFWSRQKRLA         |
| <i>Populus trichocarpa</i> v3.0 | Potri.002G191800.1 | Pt2R-MYB029 | EIGLKKGPWTPPEEDELIRYITTHGYGCWSEVPEKAGLQRCGKSCRLRWVWVKLRPNLKNCKFSADEERTVIELQSEFGNKWARIATYLPGRTDNDVKNFWSRQKRLA        |
| <i>Populus trichocarpa</i> v3.0 | Potri.002G198100.1 | Pt2R-MYB030 | KANVKKGPWSPPEEDAKLKSIEYQHGHTGGNWIAPQKIGLRCGKSCRLRWVWVKLRPNLKNCKFSADEERTVIELQSEFGNKWARIATYLPGRTDNDVKNFWSRQKRLA       |
| <i>Populus trichocarpa</i> v3.0 | Potri.002G228700.1 | Pt2R-MYB031 | DVDRIKGPWSPPEEDALQRLVQTYGPRNWSLISKSIPGRSGKSCRLRWVWVKLRPNLKNCKFSADEERTVIELQSEFGNKWARIATYLPGRTDNDVKNFWSRQKRLA         |
| <i>Populus trichocarpa</i> v3.0 | Potri.003G064600.1 | Pt2R-MYB032 | KSARIKGPWSPSEEDMILTGLVERHGPKNWSLISRYIKGRSGKSCRLRWVWVKLRPNLKNCKFSADEERTVIELQSEFGNKWARIATYLPGRTDNDVKNFWSRQKRLA        |
| <i>Populus trichocarpa</i> v3.0 | Potri.003G079100.1 | Pt2R-MYB033 | KEEIRKGPWKAEEDEVLMHVKKYGPRDWSSIRSKGLLQRTGKSCRLRWVWVKLRPNLKNCKFSADEERTVIELQSEFGNKWARIATYLPGRTDNDVKNFWSRQKRLA         |
| <i>Populus trichocarpa</i> v3.0 | Potri.003G094200.1 | Pt2R-MYB034 | KVGLRRGPWTPREDALLTEYIQAHEGEGHWRSLPKKSGLLRCGKSCRLRWVWVKLRPNLKNCKFSADEERTVIELQSEFGNKWARIATYLPGRTDNDVKNFWSRQKRLA       |
| <i>Populus trichocarpa</i> v3.0 | Potri.003G114100.1 | Pt2R-MYB035 | KQKLRKGLWSPEEDELKLSHITKYGHGCWSSVPKQAGLQRCGKSCRLRWVWVKLRPNLKNCKFSADEERTVIELQSEFGNKWARIATYLPGRTDNDVKNFWSRQKRLA        |
| <i>Populus trichocarpa</i> v3.0 | Potri.003G132000.1 | Pt2R-MYB036 | GMGIRKGPWTPPEEEDSLLAHYITTHGEGHWNSSAARCAGLKRTGKSCRLRWVWVKLRPNLKNCKFSADEERTVIELQSEFGNKWARIATYLPGRTDNDVKNFWSRQKRLA     |
| <i>Populus trichocarpa</i> v3.0 | Potri.003G144200.1 | Pt2R-MYB037 | KVGLKKGWTPPEEDELIRYITTHGYGCWSEVPEKAGLQRCGKSCRLRWVWVKLRPNLKNCKFSADEERTVIELQSEFGNKWARIATYLPGRTDNDVKNFWSRQKRLA         |

|                                 |                    |             |                                                                                                                      |
|---------------------------------|--------------------|-------------|----------------------------------------------------------------------------------------------------------------------|
| <i>Populus trichocarpa</i> v3.0 | Potri.003G144300.1 | Pt2R-MYB038 | KVGLHRGPWTTREDALLVNYIQKHGEGHWRSLPNKAGLLRCGKSCRLRWLNLYLRPDIKRGNTPEEDDLIIRLHSLLGNRWSLIAGRLPGRTDNEIKNYWNSHLSKRL         |
| <i>Populus trichocarpa</i> v3.0 | Potri.003G155700.1 | Pt2R-MYB039 | KRKVKRGLWSPDEDEKLKIKYITTHGHGSWSSVPKLAGLQRCGKSCRLRWLNLYLRPDLKRGSFQAQEEIIVEIHRMLGNRWAQIAKHLPGRTDNEVKNFVNSCIKKKL        |
| <i>Populus trichocarpa</i> v3.0 | Potri.003G189700.1 | Pt2R-MYB040 | GVGLKKGWPTS AEDAILIEYVKKHGEGNWNSVQKHSGLFRCGKSCRLRWANHLRPNLKKGAFTHEEEQLIELHAKMGNKWARMAAHLPGRTDNEIKNYWNTRIKRRQ         |
| <i>Populus trichocarpa</i> v3.0 | Potri.003G219900.1 | Pt2R-MYB041 | KVGLKRGWPTPEEDELANYIKKEGEGRWRTLPKKAGLLRCGKSCRLRWLNLYLRPDKRGNFSPDEEDLILRLHRLGNRWSLIAGRIPGRTDNEIKNYWNTLHLSKLL          |
| <i>Populus trichocarpa</i> v3.0 | Potri.004G026600.1 | Pt2R-MYB042 | NLPLKRGAWSPPEEDQLIAVINSHGIRNWIEMPKAAGLLRSGKSCRLRWLNLYLRPDIKRGNFSEEEVETILKLHGILGNRWSIAAHLPGRTDNEIKNFVNTLKKNY          |
| <i>Populus trichocarpa</i> v3.0 | Potri.004G033100.1 | Pt2R-MYB043 | KNGLLKGPWTPPEEDQLVDYIQKHGYNWRTLPKAGLQRCGKSCRLRWLNLYLRPDIKRGNFSEEEETIQLHSILGNKWSIAAARLPGRTDNEIKNYWNTHIRKRL            |
| <i>Populus trichocarpa</i> v3.0 | Potri.004G086300.1 | Pt2R-MYB044 | KVGLKKGWPTSDEDEKLLINFLANGQCCWRAVPKLAGLLRCGKSCRLRWLNLYLRPDLKRGLLSEYEEKMVIDLHAQLGNRWSKIASHLPGRTDNEIKNHWNTHIKKKL        |
| <i>Populus trichocarpa</i> v3.0 | Potri.004G088100.1 | Pt2R-MYB045 | KQGNNGAWSTQEDQLIDYIQTGHGECWRSLEAAGLHRCGKSCRLRWLNLYLRPDIKRGNFQDEEDLIIKLHALLGNRWALIAGRLPGRTDNEVKNYWNSHLSKLL            |
| <i>Populus trichocarpa</i> v3.0 | Potri.004G102600.1 | Pt2R-MYB046 | MKERQRWQPEEADAVLRAVYKQYGPKEWNLSQRVEATGKTLNRDPKSCLERWKNYLPKGIKKGSLPEEQTLVISLQAKYGNKWKTIASEVPGRTAKRLSKWWEVFKERQS       |
| <i>Populus trichocarpa</i> v3.0 | Potri.T125000.1    | Pt2R-MYB047 | EQGWRKGPWTPPEEDKLLSEYVSSNGEGRWSSVSRCSVLNFGGKSCRLRWLNLYLRPGLKRGQITPQEEGIIIHLHALWGNKWSIARIYLPGRTDNEIKNYWRTHFKKKD       |
| <i>Populus trichocarpa</i> v3.0 | Potri.004G118000.1 | Pt2R-MYB048 | EQGWRKGPWTPPEEDKLLSEYVSLNNGEGRWSSVSRCSGLNRSKGKSCRLRWLNLYLRPGLKRGQITPQEEGIIIHLHALWGNKWSIARIYLPGRTDNEIKNYWRTHFKKKD     |
| <i>Populus trichocarpa</i> v3.0 | Potri.004G126700.1 | Pt2R-MYB049 | KIGVMKGPWTPPEEDIILVSYIQEHGPGNWRAVPTNTGLLRCSKSCRLRWLNLYLRPGIKRGNFTHNEEKMIHLQALLGNRWAAIASYLPQRTDNDIKNYWNTLHLSKLL       |
| <i>Populus trichocarpa</i> v3.0 | Potri.004G138000.1 | Pt2R-MYB050 | KEHTNKGAWTKEEDERLVNYIKAQGEGCWRSLEPKAAGLLRCGKSCRLRWLNLYLRPDLKRGNFSEEEDELIINLHSLLGNRWSLIAAARLPGRTDNEIKNYWNTHIRKRL      |
| <i>Populus trichocarpa</i> v3.0 | Potri.004G174400.1 | Pt2R-MYB051 | KAHTNKGAWTKEEDRLIAIYIRTHGECWRSLEPKAAGLLRCGKSCRLRWLNLYLRPDLKRGNFSEEEDELIILHSLLGNRWSLIAAGRLPGRTDNEIKNYWNTHIRKRL        |
| <i>Populus trichocarpa</i> v3.0 | Potri.004G215100.1 | Pt2R-MYB052 | KANVKGWPTSPEEDSKLKEYIEKYGTGGNWIALPQKAGLKRKCGKSCRLRWLNLYLRPNLKHGFESEEDRVICSLFASIGSRWSIAAQLPGRTDNDIKNYWNTLHLSKLL       |
| <i>Populus trichocarpa</i> v3.0 | Potri.005G001600.1 | Pt2R-MYB053 | KQKLRKGLWSPPEEDKLLNYITKHGHGCSWSSVPKQADLQRCGKSCRLRWLNLYLRPDLKRGAFSQEENLIIELHVLGNRWSQIAAQLPGRTDNEIKNLWNSCIKKKL         |
| <i>Populus trichocarpa</i> v3.0 | Potri.005G063200.1 | Pt2R-MYB054 | RTSCHRGHWRPAEDEKLRLVDQYGPHNWNFIAEHLQGRSGKSCRLRWLNLYLRPDPNINRPFTEEEERLLRAHHIQGNRWASIALRFPGRTDNAVKNHYHVVMARRK          |
| <i>Populus trichocarpa</i> v3.0 | Potri.005G074500.1 | Pt2R-MYB055 | ESGLKKGWTPPEEDQLVKYIQKHGHGWSRALPKLAGLNRCGKSCRLRWLNLYLRPDIKRGKFSQEEETILNLHSLGNKWSIAAGHLPGRTDNEIKNFVNTLHLSKLL          |
| <i>Populus trichocarpa</i> v3.0 | Potri.005G096600.1 | Pt2R-MYB056 | KTQVMRGPWSPAEDRLITFIQKHGHENWRALPKQAGLLRCGKSCRLRWLNLYLRPDKRGNFSEEEETIILHQLGNRWSKIASHPGRTDNEIKNVWNTLHLSKLL             |
| <i>Populus trichocarpa</i> v3.0 | Potri.005G112000.1 | Pt2R-MYB057 | RAHTNKGAWTREEDKRLVAIYIAHGEGCWRSLEPKSAGLLRCGKSCRLRWLNLYLRPDLKRGNFSEEEDELIILHSLLGNNKVFILLRSWLIAGRLPGRTDNEIKNYWNTHIRKRL |
| <i>Populus trichocarpa</i> v3.0 | Potri.005G118500.1 | Pt2R-MYB058 | PINLVKGQWTAEDSLLIIRLVDEFGRKWSHIAQIFPRIGKQCRERWHNHLRDPDIKDIWSEEDRVLIAHKEIGNKWAIEIAKSLPGRTESENKHNWNTATKRRQT            |
| <i>Populus trichocarpa</i> v3.0 | Potri.017G126000.1 | Pt2R-MYB059 | SSGIRKGAWTREEDILLRDCVEKYGEGRWVHQSAGLNRCRCKSCRLRWLNLYLRPDIKRGKFSQSEEDLIIKLHRLGNRQVKMWSLIAGRLPGRTDNDIKNYWNTLHLSKLL     |
| <i>Populus trichocarpa</i> v3.0 | Potri.017G125900.1 | Pt2R-MYB060 | SSFVRKGAWTEEDILLRCKVEKYGEGRWVQIPLKAGLNRCRCKSCRMRLWLNLYLRPNVKGQFVSVEVDLIRLHKLGNRQVKMWSLIAGRLPGRTDNDIKNYWNTLHLSKLL     |
| <i>Populus trichocarpa</i> v3.0 | Potri.017G125800.1 | Pt2R-MYB061 | MVSSLVGRKGAWTEEDILLRCKVEKYGEGRWVQIPLQAGLNRCRCKSCRMRLWLNLYLRPNVNRGQFVSVEVDLIRLHKLGNRQVKMWSLIAGRLPGRTDNDIKNYWNTLHLSKLL |
| <i>Populus trichocarpa</i> v3.0 | Potri.017G125700.1 | Pt2R-MYB062 | MVSSLLVGRKGAWTEEDILLRCKVEKYGEGRWVQVPSKTGLNRCRCKSCRLRWLNLYLRPNIKRGQFVSVEVDLIRLHKLGNRQVKMWSLIAGRLPGRTDNDIKNYWNTLHLSKLL |
| <i>Populus trichocarpa</i> v3.0 | Potri.017G125600.1 | Pt2R-MYB063 | SLGVRKGAWTEEDILLRCKVEKYGEGRWVHPSRAGLNRCRCKSCRMRLWLNLYLRPNVKGQFVSVEVDLIRLHKLGNRQVKMWSLIAGRLSGRTANDVKNYWNSNQRKVV       |
| <i>Populus trichocarpa</i> v3.0 | Potri.005G164900.1 | Pt2R-MYB064 | ENGLKKGWTPPEEDQLVDYIQKHGHGWSRALPKLADLNRCGKSCRLRWLNLYLRPDIKRGKFSQDEEQTILHLHSIIGNKWSIATHLPGRTDNEIKNFVNTLHLSKLL         |
| <i>Populus trichocarpa</i> v3.0 | Potri.005G142600.1 | Pt2R-MYB065 | EMDRKGPWSPEEDEALKKLVRHGHPRNWSLISKSIPGRSGKSCRLRWLNLYLRPDIKRGKFSQDEEQTILHLHSIIGNKWSIATHLPGRTDNEIKNFVNTLHLSKLL          |
| <i>Populus trichocarpa</i> v3.0 | Potri.005G186400.1 | Pt2R-MYB066 | STACPRGHWRPAEDDKLRLVEQYGAQNWSIAEKLQGRSGKSCRLRWLNLYLRPDIKRGKFSQDEEQTILHLHSIIGNKWSIATHLPGRTDNEIKNFVNTLHLSKLL           |
| <i>Populus trichocarpa</i> v3.0 | Potri.005G224100.1 | Pt2R-MYB067 | KMGLKKGWPTAEDQILINYLHGHGNWRALPKQAGLLRCGKSCRLRWLNLYLRPDIKRGNFSEEEETIILHSLGNRWSIAAARLPGRTDNEIKNYWNTLHLSKLL             |
| <i>Populus trichocarpa</i> v3.0 | Potri.006G066400.1 | Pt2R-MYB068 | PHEFKGLWKPEEDLILKTYVETHGEGNWSTVSKRSGLMRGKSCRLRWLNLYLRPNIRRGMSQDEEDMIIRMHKLLGNRWSLIAGRLPGRTDNDVKNYWNTLHLSKLL          |
| <i>Populus trichocarpa</i> v3.0 | Potri.006G085900.1 | Pt2R-MYB069 | MKERQRWRAEEDALLRAYVYKQYGPREWNLVSQRMNTPLNRDAKSLERWKNYLPKGIKKGSLTEEEQSLVIRLQAKHGNKWKIAAEVPGRTAKRLGKWWVEVFKERQQ         |
| <i>Populus trichocarpa</i> v3.0 | Potri.006G122100.1 | Pt2R-MYB070 | GDKLRKGSWQEEEDERLTASATLLGERKWDSIARLSGLMRSGKSCRMRLWLNLYLRPNLKRGHISAEQIIQFHGQWGNKWARIARRLPGRTDNEIKNYWRTHMRKEI          |
| <i>Populus trichocarpa</i> v3.0 | Potri.006G123400.1 | Pt2R-MYB071 | KANMKGWPTSPEEDAKLKEYLEKQGTGGNWIALPQKAGLKRKCGKSCRLRWLNLYLRPNIKHGEFSDDEEDRIICSLYANIGSRWSIAAQLPGRTDNDIKNYWNTLHLSKLL     |
| <i>Populus trichocarpa</i> v3.0 | Potri.006G170800.1 | Pt2R-MYB072 | KNNVKGWPTSPEEDAKLKEYIDHFGTGGNWIALPQKIGLKRKCGKSCRLRWLNLYLRPNIKHGFSEEDNIICNLYSISGRWSVIAAQLPGRTDNDIKNYWNTLHLSKLL        |
| <i>Populus trichocarpa</i> v3.0 | Potri.006G221200.1 | Pt2R-MYB073 | KKEANRGAWTAEDQKLAQVIEIHGPKRWRSVAAKAGLNRCGKSCRLRWLNLYLRPNIKRGNISDQEEEDLIVRLHKLGNRWSLIAGRLPGRTDNEIKNYWNSHLSKLL         |
| <i>Populus trichocarpa</i> v3.0 | Potri.006G221500.1 | Pt2R-MYB074 | TGGIIRGTWTATEDKILTAYVRNYGEGNWARVPKETGLKRCGKSCRLRWLNLYLRPDKRGNISDQEEEDLIRLHKLGNRWALIAGRIPGRTDNEIKNYWNTLHLSKLL         |
| <i>Populus trichocarpa</i> v3.0 | Potri.006G221800.1 | Pt2R-MYB075 | KEGLNRGAWTALEDKILTAYIKAHGEGKWRNLPKAGLKRKCGKSCRLRWLNLYLRPDIKRGNISDQEEEDLIVRLHKLGNRWSLIAGRLPGRTDNEIKNYWNTLHLSKLL       |
| <i>Populus trichocarpa</i> v3.0 | Potri.006G234200.1 | Pt2R-MYB076 | KANVKGWPTSPEEDATLSYLETHGTGGNWIALPQKAGLKRKCGKSCRLRWLNLYLRPDIKGGFTEEDNIICLYSQMGRWSLIAAQLPGRTDNDVKNYWNTLHLSKLL          |
| <i>Populus trichocarpa</i> v3.0 | Potri.006G275900.1 | Pt2R-MYB077 | ADGMNKGAWTPLEDEMLVDYVKIHGEGKWSNIVKETGLKRCGKSCRLRWLNLYLRPDIKRGNISDQEEEDLIRLHKLGNRWSLIAGRLPGRTDNEIKNYWNTLHLSKLL        |
| <i>Populus trichocarpa</i> v3.0 | Potri.007G134500.1 | Pt2R-MYB078 | MSSRGHWRLAEDEKLELVEQYGPHNWSIAEKLQGRSGKSCRLRWLNLYLRPDIKRGKFSQEEETIILHSLVGNKWSIAASHLPGRTDNEIKNFVNTLHLSKLL              |
| <i>Populus trichocarpa</i> v3.0 | Potri.007G106100.1 | Pt2R-MYB079 | KTSCHRGHWRPAEDEKLRLVDQYGPQNWNFIAEHLQGRSGKSCRLRWLNLYLRPDIKRGNFSEEEETIILHSLVGNKWSIAASHLPGRTDNEIKNFVNTLHLSKLL           |
| <i>Populus trichocarpa</i> v3.0 | Potri.007G093900.1 | Pt2R-MYB080 | ESGLKKGWTPSEEDQLVKYIQKHGHGWSRALPKLSGLNRCGKSCRLRWLNLYLRPDIKRGKFSQEEETIILHSLVGNKWSIAASHLPGRTDNEIKNFVNTLHLSKLL          |
| <i>Populus trichocarpa</i> v3.0 | Potri.007G067600.1 | Pt2R-MYB081 | KSQVKGWPTSPEEDRLIAFIQKHGHENWRALPKQAGLLRCGKSCRLRWLNLYLRPDKRGNFSEEEETIILHQLGNRWSKIASHLPGRTDNEIKNVWNTLHLSKLL            |

|                                 |                    |             |                                                                                                               |
|---------------------------------|--------------------|-------------|---------------------------------------------------------------------------------------------------------------|
| <i>Populus trichocarpa</i> v3.0 | Potri.007G048900.1 | Pt2R-MYB082 | EMDRIKGPWSPEDEALQKL VQKHGARNWSLISKIPGRSGKSCRLRWCNQLSPQVEHRPFTPEDEDDTIIRAHARFGNKWATIARLLYGRTDNAIKNHWNSTLKRKC   |
| <i>Populus trichocarpa</i> v3.0 | Potri.007G007900.1 | Pt2R-MYB083 | KANVKKGPWSPEEDAILKAYIEHQHTGGNWIALPQKIGLKRCKGKSCRLRWLNLYRPNIKHGGFSEEDNIICSLYISIGSRWSIIAQLPGRTDNDIKNYWNTLKKKL   |
| <i>Populus trichocarpa</i> v3.0 | Potri.008G070900.1 | Pt2R-MYB084 | GDHRIKGSWSPQEDATLIKLEVEQHGPRNWSMISTGIPGRSGKSCRLRWCNQLSPEVQHRPFTPAEDAKIVQAHAIHGNKWATIARLLPGRTDNAIKNHWNSTLRRKR  |
| <i>Populus trichocarpa</i> v3.0 | Potri.008G081600.1 | Pt2R-MYB085 | KQKVKRGLWSPEEDEKLKYITSHGHGSWSSVPKFAGLKRCGKSCRLRWLNLYRPELKRGSFSAEEEEQIIIDVHRLGNRWAQIAKHLPGRTDNEVKNFVNSCIKKKL   |
| <i>Populus trichocarpa</i> v3.0 | Potri.008G088000.1 | Pt2R-MYB086 | SKLCTRGHWRPAEDTQLKLVALYGPQNWNLIAEKLEGRSGKSCRLRWFNQLDPRINRKAFTEEEEERLMQAHRLYGKNKWAMIARLFPGRTDNAVKNHWHVIMARKY   |
| <i>Populus trichocarpa</i> v3.0 | Potri.008G089200.1 | Pt2R-MYB087 | KVGLKKGPWTPEEDQKLLDYIEEHGHGSWRALPAKAGLQRCGKSCRLRWLNLYRPNIKRKGKFNLQEEQSIIRLHALLGNRWSAIAATHLPKRTDNEIKNYWNTLKKRL |
| <i>Populus trichocarpa</i> v3.0 | Potri.008G089700.1 | Pt2R-MYB088 | KVGLKKGPWTPEEDQKLLAYIEEHGHGSWRALPAKAGLRRCGKSCRLRWLNLYRPNIKRKGKFNLQEEQSIIRLHALLGNRWSAIAATHLPKRTDNEIKNYWNTLKKRL |
| <i>Populus trichocarpa</i> v3.0 | Potri.008G101400.1 | Pt2R-MYB089 | MGDLRRGPWTVEEDFKLNYIATHGEGRWNSLARCAGLKRTGKSCRLRWLNLYRPNVRRGNITLEEQLMILELHSRWGNRWSKIAQHLPGRTDNEIKNYWRTRVQKHA   |
| <i>Populus trichocarpa</i> v3.0 | Potri.008G122100.1 | Pt2R-MYB090 | ESELRRGPWTLEEDTLLTHYITRHGEGRWNLARGAGLKRTGKSCRLRWLNLYRPNIKRGNLTPQEQLLILELHSGWGNRWSKIAQHLPGRTDNEIKNYWRTRVQKEA   |
| <i>Populus trichocarpa</i> v3.0 | Potri.008G128500.1 | Pt2R-MYB091 | KQAKNQGAWSKQEDQKLDYIRKHGEGCWSYLPQAAGLLRCGKSCRLRWLNLYRPNLKRGNFAEEDLIIKLHALLGNRWSLIAGRLPGRTDNEVKNYWNHSLRRKL     |
| <i>Populus trichocarpa</i> v3.0 | Potri.008G148400.1 | Pt2R-MYB092 | KKERHIVTWTQEDDILRQISQHGTEWAIASKFKDKTTRQRRRWYTYLNSDFKGGWSPEEDLLCEAQKIFGNRWTEIAKVSGRTDNAVKNRSTLCKKRA            |
| <i>Populus trichocarpa</i> v3.0 | Potri.008G166700.1 | Pt2R-MYB093 | KMGLKRGWTPPEEDQILISYVQKYGHSNWRALPKQAGLQRCGKSCRLRWVNYRPNLKRGNFSEEEEEAIKHEILGNRWSAIAARLPGRTDNEIKNVWHTLKKRL      |
| <i>Populus trichocarpa</i> v3.0 | Potri.008G173400.1 | Pt2R-MYB094 | EEGWRKGPWTAEDRLLIEYVRLHGDGRWSSVARLAGLKRNGKSCRLRWVNYRPNLKRGNITPHEESIIVELHARWGNRWSIARSLPGRTDNEIKNYWRTHFKKKA     |
| <i>Populus trichocarpa</i> v3.0 | Potri.009G007100.1 | Pt2R-MYB095 | KANVKKGPWSPEEDSKLKEYIEKYGTGGNWIALPQKAGLKRCKGKSCRLRWLNLYRPNIKHGEFSEEDRVCISLFANIGSRWSIIAQLPGRTDNDIKNYWNTLKKKL   |
| <i>Populus trichocarpa</i> v3.0 | Potri.009G018700.1 | Pt2R-MYB096 | MIPLKKGWTS AEDAILIDYVKKHGEGNWNAVQKHSGLFRGKSCRLRWANHLRPNLKKGAFTPEENRIIHLHATMGNKWARMAAELPGRTDNEIKNYWNTRIKRLQ    |
| <i>Populus trichocarpa</i> v3.0 | Potri.009G027300.1 | Pt2R-MYB097 | QDETRKGPWTEQEDILLNFVNLFGDRRWFIAKVSGLNRTGKSCRLRWVNYRPNLKRGNITPHEESIIVELHARWGNRWSIARSLPGRTDNEIKNYWRTHTRKKA      |
| <i>Populus trichocarpa</i> v3.0 | Potri.009G044100.1 | Pt2R-MYB098 | CATLIKQWTEEDRKLRLVKQFVGRKWAQIAERVAGRAGKQCRERWHNHLRPNLKRGNITPHEESIIVELHARWGNRWSIARSLPGRTDNEIKNYWRTHTRKKA       |
| <i>Populus trichocarpa</i> v3.0 | Potri.009G053900.1 | Pt2R-MYB099 | INKFRKGLWSPEEDDKLMNYMLNNGQGCWSDVARNAGLQRCGKSCRLRWLNLYRPNLKRGNITPHEESIIVELHARWGNRWSIARSLPGRTDNEIKNYWRTHTRKKA   |
| <i>Populus trichocarpa</i> v3.0 | Potri.009G061500.1 | Pt2R-MYB100 | KAKLRKGLWSPEEDEKLKYLMLTNGQGCWSDIARNAGLQRCGKSCRLRWLNLYRPNLKRGNITPHEESIIVELHARWGNRWSIARSLPGRTDNEIKNYWRTHTRKKA   |
| <i>Populus trichocarpa</i> v3.0 | Potri.009G096000.1 | Pt2R-MYB101 | DNVRKGPWSPEEDDKLHLVIKHGPRNWTMIARAVPGRSGKSCRLRWCNQLSPEVEHRAFTREDEEIIINAHAKYGNKWATIARLLDGRTDNAIKNHWNSTLKRKY     |
| <i>Populus trichocarpa</i> v3.0 | Potri.009G134000.1 | Pt2R-MYB102 | KAHTNKGAWTKEEDRLVA YIRAHGEGCWRSLPKAAGLLRCGKSCRLRWLNLYRPNLKRGNITPHEESIIVELHARWGNRWSIARSLPGRTDNEIKNYWRTHTRKKA   |
| <i>Populus trichocarpa</i> v3.0 | Potri.010G064000.1 | Pt2R-MYB103 | EEGWRKGPWTAEDRLLVEYVRLHGEGRWNSVARLAGLKRNGKSCRLRWVNYRPNLKRGNITPHEESIIVELHARWGNRWSIARSLPGRTDNEIKNYWRTHTRKKA     |
| <i>Populus trichocarpa</i> v3.0 | Potri.010G093000.1 | Pt2R-MYB104 | KKERHIVTWTQLEDDILRQISLNGTENWAIASKFKDKTTRQRRRWYTYLNSDFKGGWSPEEDMLLCEAQKIFGNRWTEIAKVSGRTDNAVKNRSTLCKKRA         |
| <i>Populus trichocarpa</i> v3.0 | Potri.010G114000.1 | Pt2R-MYB105 | KQDTNKGAWSKQEDQKLDYIRKHGEGCWRSLPKAAGLLRCGKSCRLRWLNLYRPNLKRGNITPHEESIIVELHARWGNRWSIARSLPGRTDNEIKNYWRTHTRKKA    |
| <i>Populus trichocarpa</i> v3.0 | Potri.010G123000.1 | Pt2R-MYB106 | EGELRRGPWTLEEDTLLTRYIARNREGRWNLAKCAGLKRTGKSCRLRWLNLYRPNLKRGNITPHEESIIVELHARWGNRWSIARSLPGRTDNEIKNYWRTHTRKKA    |
| <i>Populus trichocarpa</i> v3.0 | Potri.010G141000.1 | Pt2R-MYB107 | KVGLKKGRWTAEEDEVLT KYILANGEGSWKSLPKNAGLLRCGKSCRLRWLNLYRPNLKRGNITPHEESIIVELHARWGNRWSIARSLPGRTDNEIKNYWRTHTRKKA  |
| <i>Populus trichocarpa</i> v3.0 | Potri.010G149900.1 | Pt2R-MYB108 | MVDLRRGPWTVEEDFKLIDYIATHGEGRWNSLARCAGLKRTGKSCRLRWLNLYRPNLKRGNITPHEESIIVELHARWGNRWSIARSLPGRTDNEIKNYWRTHTRKKA   |
| <i>Populus trichocarpa</i> v3.0 | Potri.010G165700.1 | Pt2R-MYB109 | KVGLKKGPWTPEEDQKLLAYVEEHGHGSWRALPAKAGLQRCGKSCRLRWLNLYRPNLKRGNITPHEESIIVELHARWGNRWSIARSLPGRTDNEIKNYWRTHTRKKA   |
| <i>Populus trichocarpa</i> v3.0 | Potri.010G167500.1 | Pt2R-MYB110 | SKLCARGHWRPAEDTKLKV ALYGPQNWNLIAEKLEGRSGKSCRLRWFNQLDPRINRKAFTEEEEERLMQTHRLYGKNKWAMIARLFPGRTDNAVKNHWHVIMARKF   |
| <i>Populus trichocarpa</i> v3.0 | Potri.010G174500.1 | Pt2R-MYB111 | KQVRVQGLWSPEEDEKLKYIATHGHGSWSSVPKFAGLKRCGKSCRLRWLNLYRPELKRGCFSALEEQVIIDAHRLGNRWSQISKHLPGRTDNEVKNFVNSRIKKKL    |
| <i>Populus trichocarpa</i> v3.0 | Potri.010G195000.1 | Pt2R-MYB112 | TNGKVKGPWSPEEDAVLSQLVSKFGARNWSLIARGIPGRSGKSCRLRWCNQLDPCLKRKPFPTDEEDRIIIAAHAKHGNKWAIAARLPGRTDNSIKNHWNSTLRRRW   |
| <i>Populus trichocarpa</i> v3.0 | Potri.011G040200.1 | Pt2R-MYB113 | NLCLKRGA WDPDEDQILRAYIMRYGTRNWNEMPKAAGLLRSGKSCRFWRMNYRPNLKRGNITPHEESIIVELHARWGNRWSIARSLPGRTDNDIKNFVNTLKRKSF   |
| <i>Populus trichocarpa</i> v3.0 | Potri.011G040300.1 | Pt2R-MYB114 | NLFLKRGTWDPDEDQKL RAYIKRHSIWNWNEMPRAGLLRSGKSCRLRWVNYRPNLKRGNITPHEESIIVELHARWGNRWSIARSLPGRTDNDIKNFVNTLKRKSF    |
| <i>Populus trichocarpa</i> v3.0 | Potri.011G040400.1 | Pt2R-MYB115 | NFCLKRGWTS ADEQMLRAYIKRYGIWNWNEMPKAAGLLRSGKSCRLRWVNYRPNLKRGNITPHEESIIVELHARWGNRWSIARSLPGRTDNEIKNFVNTLKRKSF    |
| <i>Populus trichocarpa</i> v3.0 | Potri.011G041600.1 | Pt2R-MYB116 | KNGLKKGPWTPDEDQKLIDYIQKHGYGNWRTLPKNAGLQRCGKSCRLRWLNLYRPNLKRGNITPHEESIIVELHARWGNRWSIARSLPGRTDNEIKNYWNTLKRKSF   |
| <i>Populus trichocarpa</i> v3.0 | Potri.011G125900.1 | Pt2R-MYB117 | KNGLKKGPWTAEDQKLITYIQKHGHGRWRILPKNAGLKRCKGKSCRLRWLNLYRPNLKRGNITPHEESIIVELHARWGNRWSIARSLPGRTDNEIKNYWNTLKRKSF   |
| <i>Populus trichocarpa</i> v3.0 | Potri.011G167600.1 | Pt2R-MYB118 | KDNVKGQWTPPEEDNKLSYIAQHGTNRWRLPKNAGLQRCGKSCRLRWLNLYRPNLKRGNITPHEESIIVELHARWGNRWSIARSLPGRTDNDVKNHWNTLKRKSF     |
| <i>Populus trichocarpa</i> v3.0 | Potri.012G039400.1 | Pt2R-MYB119 | MCTRGHWRPAEDEKLKELVEKYGPHNWNIAAEKLGSRGKSCRLRWFNQLDPRINRSPFTEEEEERLLASHRIHGNRWAIARFFPGRTDNAVKNHWHVIMARRY       |
| <i>Populus trichocarpa</i> v3.0 | Potri.012G055600.1 | Pt2R-MYB120 | DAELRRGPWTLEEDTLLVHYIARHGEGRWNLAKRAGLRRTGKSCRLRWLNLYRPNLKRGNITPHEESIIVELHARWGNRWSIARSLPGRTDNEIKNYWRTRVQKQA    |
| <i>Populus trichocarpa</i> v3.0 | Potri.012G072500.1 | Pt2R-MYB121 | RLNVKRWLTA EEDAKMLAHVAKHGTGNWTA VPKAGLQRCGKSCRLRWLNLYRPNLKRGNITPHEESIIVELHARWGNRWSIARSLPGRTDNDVKNYWNARLRRKL   |
| <i>Populus trichocarpa</i> v3.0 | Potri.012G080400.1 | Pt2R-MYB122 | NGEYRKLWTEEDDRILTDHVKVHGGKGNQIAKVTGLKRCGKSCRLRWVNYRPNLKRGNITPHEESIIVELHARWGNRWSIARSLPGRTDNDVKNYWNARLRRKL      |
| <i>Populus trichocarpa</i> v3.0 | Potri.012G082000.1 | Pt2R-MYB123 | KNSVVKQWTEEDRLLIHLVEQHGVRKWSVAKMLSGRIGKQCRERWHNHLRPNLKRGNITPHEESIIVELHARWGNRWSIARSLPGRTDNDVKNYWNARLRRKL       |
| <i>Populus trichocarpa</i> v3.0 | Potri.012G084100.1 | Pt2R-MYB124 | KQKLRKGLWSPEEDERLNFYITRFGVGCWSSVPKLAGLQRCGKSCRLRWLNLYRPNLKRGNITPHEESIIVELHARWGNRWSIARSLPGRTDNEIKNFVNSLCKKKL   |
| <i>Populus trichocarpa</i> v3.0 | Potri.012G140700.1 | Pt2R-MYB125 | KDEVKGPWTPPEEDQLLVQYIQKHGGLCWRS LPKNAGLLRCGKSCRLRWLNLYRPNLKRGNITPHEESIIVELHARWGNRWSIARSLPGRTDNEIKNFVNSLCKKKL  |
| <i>Populus trichocarpa</i> v3.0 | Potri.012G140500.1 | Pt2R-MYB126 | KLRHRKGLWSPEEDQRLG SYVFOHGHGCWSSVPINAGLQRTGKSCRLRWLNLYRPNLKRGNITPHEESIIVELHARWGNRWSIARSLPGRTDNEIKNFVNSLCKKKL  |

|                                 |                    |             |                                                                                                                |
|---------------------------------|--------------------|-------------|----------------------------------------------------------------------------------------------------------------|
| <i>Populus trichocarpa</i> v3.0 | Potri.012G127700.1 | Pt2R-MYB127 | KLGVKKGWPTAEEDKLVNFILTHGQCCWRAVPKLAGLRRCGKSCRLRWNTYLRPDLKRGLLNEDEEQVIDLHACLGNRWSKIAARLPGRTDNEIKNHWNTHIKKKL     |
| <i>Populus trichocarpa</i> v3.0 | Potri.013G001000.1 | Pt2R-MYB128 | KQKLRKGLWSPEEDEKLLNYITKHGLGCWSSVPKLAGLQRCGKSCRLRWINYLRPDLKRGAFSQEENLHIELHAVLGNRWSQIAAQLPGRTDNEIKNLWNSCIKKKL    |
| <i>Populus trichocarpa</i> v3.0 | Potri.013G046300.1 | Pt2R-MYB129 | RIMIKGGVWKNTEDEILKAAVMKYGKNQWARISSLLVRKSAKQCKARWYEWLDPISIKKTEWTREDEKLLHLAKLMPTQWRTIAPVGRTPSQCLERYEKLLDAAC      |
| <i>Populus trichocarpa</i> v3.0 | Potri.013G056400.1 | Pt2R-MYB130 | KVGIKRGWPTPEEDELANYIKNDGEGRWRTLPKQAGLLRCGKSCRLRWNYLRPSVVKRGRIAPDEEDLILRLHRLGNRWSLIAGRIPGRTDNEIKNYWNTLSKKL      |
| <i>Populus trichocarpa</i> v3.0 | Potri.013G056500.1 | Pt2R-MYB131 | KVGIKRGWPTPEEDELANYIKNDGEGRWRTLPKQAGLLRCGKSCRLRWNYLRPSVVKRGRIAPDEEDLILRLHRLGNRWSLIAGRIPGRTDNEIKNYWNTLSKKL      |
| <i>Populus trichocarpa</i> v3.0 | Potri.013G067000.1 | Pt2R-MYB132 | AKLCARGHWRPAEDAKLKLVAQYGPQNWNLIAENLEGRSGKSCRLRWFNQLDPRINRAFAEEEEERLLAAHRLYGKNWAMIARLFPGRTDNAVKNHWHVIMARKH      |
| <i>Populus trichocarpa</i> v3.0 | Potri.013G067500.1 | Pt2R-MYB133 | KVGIKKGWPTPEEDELANYIKNDGEGRWRTLPKQAGLLRCGKSCRLRWNYLRPSVVKRGRIAPDEEDLILRLHRLGNRWSLIAGRIPGRTDNEIKNYWNTLSKKL      |
| <i>Populus trichocarpa</i> v3.0 | Potri.013G109300.1 | Pt2R-MYB134 | KEHTNKGAWTKEEDQRLMDYIRVHGEGCWRSPLKAAAGLLRCGKSCRLRWINYLRPDLKRGNTFDEEDEIIIKLSLGNKWSLIAGRLPGRTDNEIKNYWNTHIKRL     |
| <i>Populus trichocarpa</i> v3.0 | Potri.013G148600.1 | Pt2R-MYB135 | KNGLRKGPWTPPEEDQKLTAIYIQLQPGNWRSLPKNAGLQRCGKSCRLRWNTYLRPDIKRGFRSFEEESIIQLHSILGNKWSAIAARLPGRTDNEIKNYWNTHIRKRL   |
| <i>Populus trichocarpa</i> v3.0 | Potri.013G149100.1 | Pt2R-MYB136 | KNGIRKGSWSIEEDEKLRYIYQYGHWNWRQLPKFAGLSRCGKSCRLRWNYLRPDVVKRGNFSEEDNLIQMHEELGNKWSIISGKLPGRTDNEIKNHWNTLSKRV       |
| <i>Populus trichocarpa</i> v3.0 | Potri.013G149200.1 | Pt2R-MYB137 | KTGLKKGAWTPEEDRKLMAVYTRYGCWNWRQLPKFAGLQRCGKSCRLRWNYLRPNIKRGNYSKEEETIISLHETMGNRWSAIAAQLPGRTDNEIKNHWNTLSKRL      |
| <i>Populus trichocarpa</i> v3.0 | Potri.014G022500.1 | Pt2R-MYB138 | DVDRIKGPWSPEEDEALQRLVQTYGPNWLSLISKIPGRSGKSCRLRWCNQLSPEVEHRPFAEEDDTIIRAHARIGNKWATIARLLNGRDTNAIKNHWNTLSKRC       |
| <i>Populus trichocarpa</i> v3.0 | Potri.014G035100.1 | Pt2R-MYB139 | KSERIKGPWSAEEDRILTRLVEQHGPWNWSLISRYIKGRSGKSCRLRWCNQLSPNVQHRPFSPEVEDETILAAHARFGNRWATIARLLPGRTDNAVKNHWNSTLKRRA   |
| <i>Populus trichocarpa</i> v3.0 | Potri.014G054700.1 | Pt2R-MYB140 | KEEIRKGPWKEEDEVILNHVKKYGRPDWSSIRSKGLLHRTGKSCRLRWVWNLKRNPKNGCKFAEEERVIDLQAEIGNRWARIATYLPGRTDNDVKNFWSRQKRLA      |
| <i>Populus trichocarpa</i> v3.0 | Potri.014G054700.1 | Pt2R-MYB141 | KEEIRKGPWKEEDEVILNHVKKYGRPDWSSIRSKGLLHRTGKSCRLRWVWNLKRNPKNGCKFAEEERVIDLQAEIGNRWARIATYLPGRTDNDVKNFWSRQKRLA      |
| <i>Populus trichocarpa</i> v3.0 | Potri.014G081200.1 | Pt2R-MYB142 | KNGLRKGPWTPPEEDELANYIKNDGEGRWRTLPKQAGLLRCGKSCRLRWNTYLRPDIKRGFRSFEEESIIQLHSILGNKWSAIAARLPGRTDNEIKNYWNTLSKRL     |
| <i>Populus trichocarpa</i> v3.0 | Potri.014G100800.1 | Pt2R-MYB143 | KVGLHRGPWTPREDTLLTKYIQAHEGHWRSPLPKAGLLRCGKSCRLRWNYLRPDIKRGNTFDEEDLIRMHSLGNRWSLIAGRLPGRTDNEIKNYWNTLSKRL         |
| <i>Populus trichocarpa</i> v3.0 | Potri.014G111200.1 | Pt2R-MYB144 | KQKLRKGLWSPEEDEKLLRHITKYHGCWSSVPKQAGLQRCGKSCRLRWINYLRPDLKRGTFQSEENLHIELHAVLGNRWSQIAAQLPGRTDNEIKNLWNSCLKKKL     |
| <i>Populus trichocarpa</i> v3.0 | Potri.014G117000.1 | Pt2R-MYB145 | DMGTRKGPWTPVEEDSLLAHYITNHGEGQWNTAARCAGLKRTGKSCRLRWNYLRPNVRRGNITLQEQLLILQLHSHWGNRWSKIAAQLPGRTDNEIKNYWNTLSKRL    |
| <i>Populus trichocarpa</i> v3.0 | Potri.014G122700.1 | Pt2R-MYB146 | KVGLKKGWPTAEEDKLVNFILTHGQCCWRAVPKLAGLRRCGKSCRLRWNTYLRPDLKRGAFSQEENLHIELHAVLGNRWSQIAAQLPGRTDNEIKNLWNSCIKKKL     |
| <i>Populus trichocarpa</i> v3.0 | Potri.015G046200.1 | Pt2R-MYB147 | GSELRRGPWTPLEEDTLLVHYIGRHGEGRWNTLAKRAGLRRTGKSCRLRWNYLRPNVRRGNITLQEQLLILQLHSHWGNRWSKIAAQLPGRTDNEIKNYWNTLSKRL    |
| <i>Populus trichocarpa</i> v3.0 | Potri.015G041100.1 | Pt2R-MYB148 | KQYTNKGAWSQEDQKLIDYIYQKHGEGCWRSPLQAAGLLRCGKSCRLRWNYLRPDLKRDGFGEDEEDLIRLHALLGNRWSLIAGRLPGRTDNEIKNYWNTLSKRL      |
| <i>Populus trichocarpa</i> v3.0 | Potri.015G033600.1 | Pt2R-MYB149 | MCTRGHWRPAEDEKLKELVEKYGPHNWNIAEKLHGRSGKSCRLRWFNQLDPRINRSPFTEEEERLLASHRIHGNRWAVIARLFPGRTDNAVKNHWHVIMARRY        |
| <i>Populus trichocarpa</i> v3.0 | Potri.015G067700.1 | Pt2R-MYB150 | KFNVKRGLWTADEDAKILAHVAKHGTGNWTAVPKQAGLQRCGKSCRLRWNTYLRPDLKHDNFTPQEEEMIIIRLHAAIGSRWSIAAQLPGRTDNDVKNCWNTLSKRL    |
| <i>Populus trichocarpa</i> v3.0 | Potri.015G075600.2 | Pt2R-MYB151 | SREYRKLWTPVEEDRILMDYVVKHGGKGNRAAKVAGLKRGGKSCRLRWNYLRPSVVKRGAFSEEDDLIRLHKLGNRFLFISWSLIAGRIPGRTDNQVKNHWNTHLSIKL  |
| <i>Populus trichocarpa</i> v3.0 | Potri.015G075800.1 | Pt2R-MYB152 | SSEYRKAFWTAEDRILMDYVKAHGGKGNWPKRFECCGLGLKRCGKSCRLRWNYLRPSVVKHGGFSEEDDLIRLHKLGNRWSLIAGRVPGRTDNQVKNHWNTRISKLGKIK |
| <i>Populus trichocarpa</i> v3.0 | Potri.015G077700.1 | Pt2R-MYB153 | KNSIVKQWTPTEEDRILQVQNGVVRKWHVAQMLPGRIGKQCRERWHNHLRPNIKKDTWSVEEDKVLIAHSELGNRWAEIAKMLPGRTENSIGNHWNATKRRKQY       |
| <i>Populus trichocarpa</i> v3.0 | Potri.015G082700.1 | Pt2R-MYB154 | KQKLRKGLWSPEEDEKLLNYITRFGVGCWSSVPKLAGLQRCGKSCRLRWINYLRPDLKRGFMFSQEEEDLISLHEVLGNRWAQIAAQLPGRTDNEIKNLWNSYLKKL    |
| <i>Populus trichocarpa</i> v3.0 | Potri.015G143500.1 | Pt2R-MYB155 | QDGVKKGWPTPEEDHLLVYIYQKHGEGCWRSPLQAAGLLRCGKSCRLRWNYLRPDIKRGFRSFEEESIIQLHSILGNKWSAIAARLPGRTDNEIKNYWNTLSKRL      |
| <i>Populus trichocarpa</i> v3.0 | Potri.015G129100.1 | Pt2R-MYB156 | KLGVKKGWPTAEEDKLVNFILTHGQCCWRAVPKLAGLRRCGKSCRLRWNTYLRPDLKRGLLNDDEEKVIDLHARLGNRWSKIAARLPGRTDNEIKNHWNTHIKKKL     |
| <i>Populus trichocarpa</i> v3.0 | Potri.017G130300.1 | Pt2R-MYB157 | KVGLKKGWPTSDDEKLLITFILANGQCCWRAVPKLAGLRCGKSCRLRWNTYLRPDLKRGLLSEYEEKMVIDLHAQLGNRWSKIASHLPGRTDNEIKNHWNTHIKKKL    |
| <i>Populus trichocarpa</i> v3.0 | Potri.017G128900.1 | Pt2R-MYB158 | KQGNNGAWSVQEDQKLIDYIYQKHGEGCWRSPLQAAGLLRCGKSCRLRWNYLRPDIKRGFRSFEEESIIQLHSILGNKWSAIAARLPGRTDNEIKNYWNTLSKRL      |
| <i>Populus trichocarpa</i> v3.0 | Potri.017G017600.1 | Pt2R-MYB159 | MSTRGHWRPAEDEKLKELVEKYGPHNWNIAEKLHGRSGKSCRLRWFNQLDPRINRSPFTEEEERLLACQIIGHGNKWAIVAKQFPGRTDNAVKNHWHVIMARKC       |
| <i>Populus trichocarpa</i> v3.0 | Potri.017G071500.1 | Pt2R-MYB160 | DVEVRKGPWTPLEEDLILTNHIANHGEVWNSLAKAAGLKRRTGKSCRLRWNYLRPDLRGNITPEEQLLIMELHAKWGNRWSKIAKHLPGRTDNEIKNYWNTLSKRL     |
| <i>Populus trichocarpa</i> v3.0 | Potri.017G075000.1 | Pt2R-MYB161 | KSNVKRGLWTPEDAKILAYVSNHGIGNWTSVPKQAGLNRGKSCRLRWNTYLRPDLKHERFAPEEEELIILHKAIGSRWSLIAKLPGRTDNDVKNYWNTLSKRL        |
| <i>Populus trichocarpa</i> v3.0 | Potri.017G082500.1 | Pt2R-MYB162 | KIGVKKGPWTPPEEDELANYIKNDGEGRWRTLPKQAGLLRCGKSCRLRWNTYLRPDIKRGFRSFEEESIIQLHSILGNKWSAIAARLPGRTDNEIKNYWNTLSKRL     |
| <i>Populus trichocarpa</i> v3.0 | Potri.017G085200.1 | Pt2R-MYB163 | PKICNRGHWRPAEDSKLKLVAQYGPQNWNLIAEKLGRSGKSCRLRWFNQLDPRINRSPFTEEEERLLAAHRLYGKNWAMIARLFPGRTDNAVKNHWHVIMARKY       |
| <i>Populus trichocarpa</i> v3.0 | Potri.017G086300.1 | Pt2R-MYB164 | KVGLKKGWPTPEEDQKLTAIYIQLQPGNWRSLPKNAGLQRCGKSCRLRWNTYLRPDIKRGFRSFEEESIIQLHSILGNKWSAIAARLPGRTDNEIKNYWNTLSKRL     |
| <i>Populus trichocarpa</i> v3.0 | Potri.017G099500.1 | Pt2R-MYB165 | EKGWRKGPWTPPEEDKLLIEYVSLHGEGRWSSVSRCPGLNRSKSCRLRWNYLRPGLKRGQITPQEEGIIILHALLGNKWSIARLFPGRTDNEIKNYWNTLSKRL       |
| <i>Populus trichocarpa</i> v3.0 | Potri.017G112300.1 | Pt2R-MYB166 | MKERQRWQPEEDAILRAYVYKQYGPKEWNLISQRVEASGKTLNRDPKSCLERWKNYLKPGIKKGLTPEEQALVISLQAKYGNKWKIASEVPGRTAKRLSKWWEVFEKQS  |
| <i>Populus trichocarpa</i> v3.0 | Potri.018G005300.1 | Pt2R-MYB167 | KDGLNKGAWTPLEDKMLMDYLKIHGEGKWSNIVKETGLKRCGKSCRLRWNYLRPNIKRGNFSEDEEDLIRLHKLGNRWSLIAGRLPGRTDNEIKNYWNTLSKRL       |
| <i>Populus trichocarpa</i> v3.0 | Potri.018G049600.1 | Pt2R-MYB168 | KEGLNRGAWTALEDKILMAYIKAHGEGNWRNLPERAGLKRRCGKSCRLRWNYLRPDIKRGFRSFEEESIIQLHSILGNKWSAIAARLPGRTDNEIKNYWNTLSKRL     |
| <i>Populus trichocarpa</i> v3.0 | Potri.018G049200.1 | Pt2R-MYB169 | KEGLNRGAWTALEDKILMAYIKAHGEGNWRNLPERAGLKRRCGKSCRLRWNYLRPDIKRGFRSFEEESIIQLHSILGNKWSAIAARLPGRTDNEIKNYWNTLSKRL     |
| <i>Populus trichocarpa</i> v3.0 | Potri.018G049000.1 | Pt2R-MYB170 | KKEANKGAWTAEDQKLARVIEIHPKRWSIAAKADLNRGKSCRLRWNYLRPNIKRGNISDQEEEDLIRLHKLGNRWSLIAGRLPGRTDNEIKNYWNTLSKRL          |

|                                  |                    |             |                                                                                                                                                                    |
|----------------------------------|--------------------|-------------|--------------------------------------------------------------------------------------------------------------------------------------------------------------------|
| <i>Populus trichocarpa</i> v3.0  | Potri.018G095900.1 | Pt2R-MYB171 | KNNVKKGPWSPEEDAKLKA YIDQFGTGGNWIALPQKVGLKRCGKSCRLRWLNLYLRPNIKHGGFSEEDNIICSLYISIGSRWSIIAQLPGRTDNDIKNYWNTLKKKL                                                       |
| <i>Populus trichocarpa</i> v3.0  | Potri.018G127700.1 | Pt2R-MYB172 | KPKAKKGLWKPEEDLILKTYVETHGEGNWSTVSKSGLMRGKSCRLRWKNYLRPNIKRGGMSQEEEDMIIRMHKLLGNRWSLIAGRLPGRTDNEVKNYWNTLKNKRL                                                         |
| <i>Populus trichocarpa</i> v3.0  | Potri.006G066400.1 | Pt2R-MYB173 | PHEFKKGLWKPEEDLILKTYVETHGEGNWSTVSKRSGLMRCGKSCRLRWKNYLRPNIRGGMSQDEEDMIIRMHKLLGNRWSLIAGRLPGRTDNDVKNYWNTLKNKRC                                                        |
| <i>Populus trichocarpa</i> v3.0  | Potri.T011400.1    | Pt2R-MYB174 | KEHTNKGAWTKEEDERLNYIKSHGEGCWRSLPKAAGLLRCGKSCRLRWYNLRPDLKRGNFSDDEDELIINLHSLGKNSLIAARLPGRTDNEIKNYWNTLHKRKL                                                           |
| <i>Populus trichocarpa</i> v3.0  | Potri.019G018200.1 | Pt2R-MYB175 | MMGLKKGPWTPEEDQILVSYIRS YGHGNWRALPKQAGLLRCGKSCRLRWYNLRPDLKRGNFSDDEEIIKLHQLGNRYVFLTRLPAGRTDNEIKNYWNTLHKKRF                                                          |
| <i>Populus trichocarpa</i> v3.0  | Potri.019G018400.1 | Pt2R-MYB176 | RIMIKGGVWKNTEDEILKAAVMKYGKNQWARISSLLVRKSAKQCKARWYEWLDPISIKTEWTTREEDEKLLHLAKLMPTQWRTIPIVGRTPSQCLERYEKLLDAAC                                                         |
| <i>Populus trichocarpa</i> v3.0  | Potri.019G036300.1 | Pt2R-MYB177 | KVGIKKGPWTPEEDELANYIRKEGQGRWRTLPRKAGLLRCGKSCRLRWNYLRPSVKRGRIAPDEEDLILRLHRLGNRWSMIAGRIPGRTDNEIKNYWNTLCSKKL                                                          |
| <i>Populus trichocarpa</i> v3.0  | Potri.019G036400.1 | Pt2R-MYB178 | KVGIKKGPWTPEEDELANYIRKEGEGRWRTLPRKAGLLRCGKSCRLRWNYLRPSVKRGRIAPDEEDLILRLHRLGNRWSMIAGRIPGRTDNEIKNYWNTLCSKKL                                                          |
| <i>Populus trichocarpa</i> v3.0  | Potri.019G040900.1 | Pt2R-MYB179 | TKLCARGHWRPAEDA KLKELVAQYGPQNWNLIAENLEGRSGKSCRLRWQDLPNGINRAFTEEEEERLLAAHRLYGNKWAMISRLFPGRTDNAVKNHWHVIMARKH                                                         |
| <i>Populus trichocarpa</i> v3.0  | Potri.019G045900.1 | Pt2R-MYB180 | KDGIKKGPTPEEDIILVSYIQEHGPGNWRSVPTNTGLLRCSKSCRLRWNTYLRPGIKRGNFTPHEEGMIIHLQAILGNKWAIIASYPQRTDNDIKNYWNTLHKKKL                                                         |
| <i>Populus trichocarpa</i> v3.0  | Potri.019G050900.1 | Pt2R-MYB181 | ESALKKGPWTPEEDQLIDYVQKHGHGSRWALPMLAGLNRGKSCRLRWNTYLRPDIKRGNFSEEEQMIIDFHQVLGNKWSAIAQHLPGRTDNEIKNFNTLHKKKL                                                           |
| <i>Populus trichocarpa</i> v3.0  | Potri.019G081500.1 | Pt2R-MYB182 | KAHTNKGAWTKEEDQLIDYIRVHGEWCWRSLPKAAGLLRCGKSCRLRWYNLRPDLKRGNFTEEEDEIIKLHSLGKNSLIAAGKLPGRTDNEIKNYWNTLHKRKL                                                           |
| <i>Populus trichocarpa</i> v3.0  | Potri.019G118200.1 | Pt2R-MYB183 | KNGLKKGPTPEEDHLISFIQLHGPGNWRSLPKNAGLQRCGKSCRLRWNTYLRPDIKRGFRSFEETIIQLHSLVGNKWSAIAARLPGRTDNEIKNYWNTLHKKRL                                                           |
| <i>Populus trichocarpa</i> v3.0  | Potri.019G118700.1 | Pt2R-MYB184 | KNGLRKGAWSKKEEDKLRVYVQKYGHWNWRQLPRFAGLSRCGKSCRLRWNYLRPDKRGNFSDDEEDNLIQMHEELGNKWSIIAGKLPGRTDNEIKNHWHNTLHKKRV                                                        |
| <i>Populus trichocarpa</i> v3.0  | Potri.019G118800.1 | Pt2R-MYB185 | KNGVKKGAWSEEDDKLREHIEKYGLWNWREIPKFAGLSRCGKSCRLRWNYLRPDKHGNVYKTEEEDLILKHEKHGNKWSIIAALPGRTDNEVKNYWNTLHKKRT                                                           |
| <i>Populus trichocarpa</i> v3.0  | Potri.019G118900.1 | Pt2R-MYB186 | KTELKKGAWTPEEDMKLMAYVTRYGSWNWRQLPKYAGLQRCGKSCRLRWLNLYLRPNIKRGNVYKTEEEIIISLHETLGNRWSAIAAQLPGRTDNEIKNHWHNTLHKKRL                                                     |
| <i>Populus trichocarpa</i> v3.0  | Potri.006G085600.1 | Pt3R-MYB1   | PIRRAKGGWTPPEEDTLRTAVATYKGSWKKIAEFFDRSEVQCLHRWQKVLDPKELVKGKWPWTQEEEDKIVELVAKYGPTKWSVIAKALPGRIGKQCRERWHNHLNPDIKKDAW                                                 |
| <i>Populus trichocarpa</i> v3.0  | Potri.006G241700.1 | Pt3R-MYB2   | ARRSTKQWTAEEDEILRKA VQRFKGKNWKKIAECFKDRTDVQCLHRWQKVLNPELVKGPWSKEEDEIIIELVNKYGPKKWSTIAQHLPRIGKQCRERWHNHLNPSINKEAWT                                                  |
| <i>Populus trichocarpa</i> v3.0  | Potri.018G038000.1 | Pt3R-MYB3   | QEEELALIRAHQIYGNRWAELTKFLPGRTDNAIKNHWNSSVKKKL<br>ARRSTKQWKAEEDEILRKA VQRFKGKNWKKIAECFKDRTDVQCLHRWQKVLNPELVKGPWSKEEDEIIIELVNKYGPKKWSTIAQHLPRIGKQCRERWHNHLNPAINKEAWT |
| <i>Populus trichocarpa</i> v3.0  | Potri.018G038000.1 | Pt3R-MYB3   | QEEVALIRAHQIYGNRWAELTKFLPGRTDNAIKNHWNSSVKKKL<br>GPTRRSKKWTGEEDKILADAVKRYNSKNWKKIAECVPDRTDVQCLHRWQKVLDPKLVKGPWSKEEDDLIRELVEKHGNKWSQVAKHLTGRIGKQCRERWHNHLNPDINRTP    |
| <i>Populus trichocarpa</i> v3.0  | Potri.014G079300.1 | Pt3R-MYB4   | WTKEEEAILIKAHGAYGNKWAELAKLLHGRTESENKHNWNCVSRKRI                                                                                                                    |
| <i>Medicago truncatula</i> 4.0v1 | AC229728_1.1       | Mt2R-MYB01  | KRLKKGTLWSKEEDEILKAYVEKHGTGNWKEVSKNTGLAHGNSCRFRWYNTLRPDLRKGPFSEEEEEKFELFSKFGEFKWSKMALEMPGRTDNDIKNFNWRNKRKHQR                                                       |
| <i>Medicago truncatula</i> 4.0v1 | Medtr1g021230.1    | Mt2R-MYB02  | EGGLKKGPTWAAEDELVAHVQKYGEGNWNVRKCTGLARCGKSCRLRWANHLRPLRKGAITAEERRIIEHLHMKMGNKWAQMAALLPGRTDNEIKNFNWRNTRCKKRGR                                                       |
| <i>Medicago truncatula</i> 4.0v1 | Medtr1g043050.1    | Mt2R-MYB03  | KKGLKKGPTWLEDEILTSYINKHGHSNWRALPKDAGLLRCGKSCRLRWYNLRDTRDKRGNFSEEEQIIIMHELLGNRWSAIAAKLPGRTDNEIKNMWNTLHKKRL                                                          |
| <i>Medicago truncatula</i> 4.0v1 | Medtr1g043080.1    | Mt2R-MYB04  | KKGLKKGPTWLEDEILTSYINKHGHSNWRALPKHAGLLRCGKSCRLRWYNLRPDLKRGNFTEEEETIIMHESLGNRWSAIAAKLPGRTDNEIKNVWNTLHKKRL                                                           |
| <i>Medicago truncatula</i> 4.0v1 | Medtr1g045610.1    | Mt2R-MYB05  | EVWRKGPWTAEDRLLIDYVRLHGEGRWNSVARLTGLKRNGKSCRLRWYNLRPDLKRGQITPQEEIIEELHARWGNRWSTIARSLPGRTDNEIKNYWRTHFKKKAK                                                          |
| <i>Medicago truncatula</i> 4.0v1 | Medtr1g062050.1    | Mt2R-MYB06  | KSLKKGPTWQEEEDMLININTHGPGNWRNLPKNAGLQRCGKSCRLRWNTYLRPDIKRGFRSFEESIIQLHSLVGNNTSQTFRFRYISKSKDFVRLPWSAIAARLPGRTDNEIK                                                  |
| <i>Medicago truncatula</i> 4.0v1 | Medtr1g073170.1    | Mt2R-MYB07  | DRWRKGPWTSEEDKLLIEYVKLHGEGRWNSVSRLAGLRRNGKSCRLRWYNLRPDLKKGQITPQEEIIEELHARWGNRWSTIARSLPGRTDNEIKNYWRTHFKKKNK                                                         |
| <i>Medicago truncatula</i> 4.0v1 | Medtr1g083630.1    | Mt2R-MYB08  | TIKLLKGAWSLHEDAILKEYVRKYGEGNWDVKKTELFRGKSCRLRWNLHLPDLKKGKQITREEEQKIVELHAKIGPKWSLMVQELPGRTDNEIKNFNWRNTRKRRTK                                                        |
| <i>Medicago truncatula</i> 4.0v1 | Medtr1g085040.1    | Mt2R-MYB09  | KQKLRKGLWSPEEDEKLLNYITKHGHGSWSSVPKLAGLQRCGKSCRLRWYNLRPDLKRGAFSQEENLIEELHARWGNRWSTIARSLPGRTDNEIKNLWNTLHKKRL                                                         |
| <i>Medicago truncatula</i> 4.0v1 | Medtr1g085900.1    | Mt2R-MYB10  | KRLKKGTLWSKEEDEILKAYVEKHGTGNWKEVSKNTGLAHGNSCRFRWYNTLRPDLRKGPFSEEEEEKFELFSKFGEFKWSKMALEMPGRTDNDIKNFNWRNKRKHQR                                                       |
| <i>Medicago truncatula</i> 4.0v1 | Medtr1g086510.1    | Mt2R-MYB11  | ETGVRKGPWTLEEDTILVDYITIHGEGHWNTLASSAGLRRSGKSCRLRWLNLYLRPDLRRGNITLQEQLILDLSHRWGNRWKIAQHLPGRTDNEIKNYWRTRVIKQA                                                        |
| <i>Medicago truncatula</i> 4.0v1 | Medtr1g086530.1    | Mt2R-MYB12  | DTMVIKKGPTWTEEDTILMNYVAHVGDGHWNSVARCSGLKRTGKSCRLRWLNLYLRPNVRRGNITLQEQLILDLSHRWGNRWKIAEQLPGRTDNEIKNYWRTRVVKQA                                                       |
| <i>Medicago truncatula</i> 4.0v1 | Medtr1g110460.1    | Mt2R-MYB13  | EENELRRGPWTLEEDSLIHYIARHGEGRWNTLAKSAGLKRTGKSCRLRWLNLYLRPDKRGNLTPQEQLLILELHSHKGNRWKIAQHLPGRTDNEIKNYWRTRVQKQA                                                        |
| <i>Medicago truncatula</i> 4.0v1 | Medtr2g033170.1    | Mt2R-MYB14  | DELDRRGPWTVEEDLALINIANHGEGRWNTLARSAGLKRTGKSCRLRWLNLYLRPDRRGNITLLEEQLLILELHSHKGNRWKIAQYLPGRTDNEIKNYWRTRVQKHA                                                        |
| <i>Medicago truncatula</i> 4.0v1 | Medtr2g034790.1    | Mt2R-MYB15  | KVGLKKGRTWAEEDKILTDYIKENEGSWRFLPKKAGLLRCGKSCRLRWYNLRADVKRGNISPEEEIIVKLHARWGNRWVIAHSLPGRTDNEIKNYWNTLHKKRI                                                           |
| <i>Medicago truncatula</i> 4.0v1 | Medtr2g064160.1    | Mt2R-MYB16  | KQKIKRGLWSPEEDKLLITYITTHGHKSWSVVPKLAGLQRCGKSCRLRWNTYLRPDLKRGFSFTAEQIIIDHRIHILGNRWAKIHLPGRTDNEVKNFVNSCIKKKL                                                         |
| <i>Medicago truncatula</i> 4.0v1 | Medtr2g088170.1    | Mt2R-MYB17  | RTGMKKGPTWPHEDMILTEYVKNHGEGNWVFNQKNSGLLRGKSCRLRWANHLRPNLKKGSFSEEEIIEELHAKLGNKWARMATQLPGRTDNEIKNFNWRNTRMKRRQR                                                       |
| <i>Medicago truncatula</i> 4.0v1 | Medtr2g089420.1    | Mt2R-MYB18  | NNGLRKGSTWHEEDKLLIAYVTRYGCWNWRQLPRFAGIRKGLERCGKSCRLRWNYLRPDKRGNFQEEELIIEKLHEKLGNRWTVIASNFPGRTDNEIKNHWHNTLHKKRFV                                                    |
| <i>Medicago truncatula</i> 4.0v1 | Medtr2g089450.1    | Mt2R-MYB19  | KNGLRKGRTWTEEDKLLIAYVTRYGCWNWRQLPKFAGLERCGKSCRLRWLNLYLRPDIKRGFSFSEEEIIEKLHEKLGNRWTVIASNFPGRTDNEIKNYWNTLHKKTL                                                       |
| <i>Medicago truncatula</i> 4.0v1 | Medtr2g089620.1    | Mt2R-MYB20  | KSLKKGPTWQEEEDMLININTHGPGNWRNLPKNAGLQRCGKSCRLRWNTYLRPDIKRGFRSFEESIIQLHSLVGNNTSQTFRFRYISKSKDFVRLPWSAIAARLPGRTDNEIK                                                  |
| <i>Medicago truncatula</i> 4.0v1 | Medtr2g096380.1    | Mt2R-MYB21  | EVVRKGPWTEQEDFKLVSVFGLGDRRWDIFIAKVSGLKAVAGDSLNRGKSCRLRWYNLRPDLKRGKMPHEERLVELEQSKWGNRWRIARLPGRTDNEIKNYWRTHMRKK                                                      |
| <i>Medicago truncatula</i> 4.0v1 | Medtr2g097910.1    | Mt2R-MYB22  | AQ                                                                                                                                                                 |
| <i>Medicago truncatula</i> 4.0v1 | Medtr2g097910.1    | Mt2R-MYB22  | KKKLRKGLWSPEEDEKLMNYMVRNGQGCWSDVARNAGLERCGKSCRLRWYNLRPDLKRGAFSTQEEELIIEHSLGKNSLIAARLPGRTDNEIKNFNWRNTRIKKRL                                                         |
| <i>Medicago truncatula</i> 4.0v1 | Medtr2g099740.1    | Mt2R-MYB23  | KQKVKRGLWSPEEDEKLLINYITNYGHGSWSSVPKLAGLQRCGKSCRLRWYNLRPDLKRGFSFPQEAALIEHLHILGNRWAKIHLPGRTDNEVKNFVNSCIKKKL                                                          |
| <i>Medicago truncatula</i> 4.0v1 | Medtr3g039990.1    | Mt2R-MYB24  | KIGVKKGPWTPEEDIILVSYIQEHGPGNWRSVPTTTGLMRCGKSCRLRWNTYLRPDIKRGNFNDHEEKMIHLQALLGNRWAAIASYLPERTDNDIKNYWNTLHKKKL                                                        |

|                                  |                 |            |                                                                                                                                                                                                                                                       |
|----------------------------------|-----------------|------------|-------------------------------------------------------------------------------------------------------------------------------------------------------------------------------------------------------------------------------------------------------|
| <i>Medicago truncatula 4.0v1</i> | Medtr3g052430.1 | Mt2R-MYB25 | EANLKKGPWTTGEDTILIDYVTKHGEWNVA VQKNTGLNRCGKSCRLRWANHLRPNLKKGAFSHEEEKLIVELHAQFGNKWARMAALLPGRTDNEIKNYWNTRIKRRQR                                                                                                                                         |
| <i>Medicago truncatula 4.0v1</i> | Medtr3g052450.1 | Mt2R-MYB26 | EANLKKGPWTTGEDTILIDYVTKHGEWNVA VQKNIGLNRCGKSCRLRWANHLRPNLKKGAFSHEEEKIIVELHAQFGNKWARMAALLPGRTDNEIKNYWNTRIKRRQR                                                                                                                                         |
| <i>Medicago truncatula 4.0v1</i> | Medtr3g065440.1 | Mt2R-MYB27 | KVGLKKGPWTAEDDKLINFILTNQCCWRA VPKLAGLLRCGKSCRLRWNTYLRPDLKRGLLSEYEEKMVIDLHAQLGNRWSKIASHLPGRTDNEIKNHWNTHIKKKL                                                                                                                                           |
| <i>Medicago truncatula 4.0v1</i> | Medtr3g077110.1 | Mt2R-MYB28 | KQKLKGLWSPEEDEKLFNYITMFGVGCWSSVPKLAGLRCGKSCRLRWNYLRPDLKRGFMFSKQEEEDLIINLHEALGNRWAQIAAQLPGRTDNEIKNFWNSSLKKKL<br>KRVGMNRNNKAYPYASRKPEKVKKKINFIKQWTVVEEDRLLVQLVGEHGLRKRWSHIAENLPGRIGKQCRERWHNHLKPDIKKDWSEEDNLIKAAHEEIGNKWAEIAKRLPGRT<br>ENSIKHNWNTKRRQYS |
| <i>Medicago truncatula 4.0v1</i> | Medtr3g077650.1 | Mt2R-MYB29 | KVGLKRGWPTVEEDEVLSEYIKKEGGRWRTLPKRAGLLRCGKSCRLRWNYLRPDSVVKRQIAPDEEDLILRLHRLGNRWSLIAGRIPGRTDNEIKNYWNTLHLSKLL                                                                                                                                           |
| <i>Medicago truncatula 4.0v1</i> | Medtr3g101290.1 | Mt2R-MYB31 | NQNKLDRIKGPWSAEEDRILTRLVEQHGARNSLISR YIKGRSGKSCRLRWCNQLSPTVEHRPFSSQEDETIIAAHAQYGNRWATIARLLPGRTDNAVKNHWNSTLKRKR                                                                                                                                        |
| <i>Medicago truncatula 4.0v1</i> | Medtr4g063100.1 | Mt2R-MYB32 | RKGPWTEQEDYKLA YFVGLFGDRRWDFIAKVSGLKV AGESLSRSRGKSCRLRWVNYLHPDLKRGKMTPEEERLVMELHWSKWNRSRIARLPGRTDNEIKNYWRTHMRKKR                                                                                                                                      |
| <i>Medicago truncatula 4.0v1</i> | Medtr4g073420.1 | Mt2R-MYB33 | KAHTNKGAWTKEEDRLISYIRAHGEGCWRSPLKAAAGLLRCGKSCRLRWNYLRPDLKRGNFTEEEDELIKLSLLGNKWSLIAGRLPGRTDNEIKNYWNTHIRKRL<br>EKINLNEDNPNSYVSGKEVDGTGHSKLCARGHWRPAEDSKLKV ALYGPQWNWLIAEKLEGRSGKSCRLRWQNLDPNRRAFSDEEEERLMAHRIYGNKWAMIARLPG<br>RTDNAVKNHWHVIMARKY        |
| <i>Medicago truncatula 4.0v1</i> | Medtr4g082230.1 | Mt2R-MYB35 | KVRLKKGPWTPPEEDQLIAYIKFEGHGSWHALPAKAGLPRCGKSCRLRWNTYLRPDIKRGKFSLQEEQTIQLHALLGNRWSAIAAQLPRRTDNEIKNYWNTLHKKRL                                                                                                                                           |
| <i>Medicago truncatula 4.0v1</i> | Medtr4g091490.1 | Mt2R-MYB36 | KNNGLKRGWTPQEEEDQLIDYIQKHGYGNWRLPKNAGLQRCGKSCRLRWNTYLRPDIKRGKFSFEEETIIQLHSILGNKWSIASRLPGRTDNEIKNYWNTHIRKRL                                                                                                                                            |
| <i>Medicago truncatula 4.0v1</i> | Medtr4g100720.1 | Mt2R-MYB37 | KETMNRGAWTQEEEDQLAQCIQIHGAKKWKTVANNSGLNRCGKSCRLRWNYLRPNIKRGNISDEEEDLIIRLHKLGNRWSLIAGRLPGRTDNEIKNYWNSHLCKKA                                                                                                                                            |
| <i>Medicago truncatula 4.0v1</i> | Medtr4g108430.1 | Mt2R-MYB38 | KLGIKKGPWTPPEEDIILVSYIQHGPNGWRSVPTNTGLMRCGKSCRLRWNTYLRPGIKRGNFTDHEEKMIVHLQALLGNRWSAIAAQLPQRTDNDIKNYWNTLHKKRM                                                                                                                                          |
| <i>Medicago truncatula 4.0v1</i> | Medtr4g121460.1 | Mt2R-MYB39 | KIGLKKGRWTAEDDKILTIDYIQEHGEGSWRSLPKNAGLLRCGKSCRLRWNYLRSDVVKRGNITPQEEIIVKLHVLGNRWSVIAGHLPGRTDNEIKNYWNSHLRKKI                                                                                                                                           |
| <i>Medicago truncatula 4.0v1</i> | Medtr4g128190.1 | Mt2R-MYB40 | KGLKKGKWSKEEEMDKVSRNAGLRCGKSCRLRWNYLHPDVKKGPFSEEEKTVFRFFNFGFEKWSKLAQELPGRSDNDIKNFVNARKRKL                                                                                                                                                             |
| <i>Medicago truncatula 4.0v1</i> | Medtr4g128670.1 | Mt2R-MYB41 | KANVKKGPWSPEEDATLSKIETNGTGGNWIALPQKIGLRCGKSCRLRWNYLRPNIKHGGFTEEDNIICSLYISIGSRWSIAAQLPGRTDNDIKNYWNTLHKKL                                                                                                                                               |
| <i>Medicago truncatula 4.0v1</i> | Medtr5g007370.1 | Mt2R-MYB42 | ESGLKGPWSPEEDKILVDHIQKHGHSWRALPKLAGLNRGKSCRLRWNYLRPDIRRGKFSDEEENLIINLHSLVGNKWSAIAATHLPGRTDNEIKNFWNTHLKKL                                                                                                                                              |
| <i>Medicago truncatula 4.0v1</i> | Medtr5g010020.1 | Mt2R-MYB43 | QQKVKRGLWSPEEDEKLIRYITTHGYGCWSEVPEKAGLQRCGKSCRLRWNYLRPDIRRGRFTPEEEKLHSLHGTVGNRWASHLPGRTDNEIKNYWNSWIKKI                                                                                                                                                |
| <i>Medicago truncatula 4.0v1</i> | Medtr5g010470.1 | Mt2R-MYB44 | SIMTKKGVWKNTEDEILKAAVMKYGKNQWARISLLVCKSAKQCKARWYEWLDPSEIKTEWTRREEDEKLLHLAKVMPTQRRTISVGRTPSQCLERYEKLLDAACVKDGN                                                                                                                                         |
| <i>Medicago truncatula 4.0v1</i> | Medtr5g014990.1 | Mt2R-MYB45 | KANVKKGPWSPEEDAKLSYIEQNGTGGNWIALPQKIGLRCGKSCRLRWNYLRPNIKHGGFSEEEEDDIICSLYVSIGSRWSIAAQLPGRTDNDIKNYWNTLHKKL                                                                                                                                             |
| <i>Medicago truncatula 4.0v1</i> | Medtr5g016510.1 | Mt2R-MYB46 | GPWSPEEEDALQKLVEKHGPRNWSIISKIPGRSGKSCRLRWCNQLSPQVEHRAFTPEEDTIIIRAHARFNGKWATIARLLSGRTDNAIKNHWNSTLKRKC                                                                                                                                                  |
| <i>Medicago truncatula 4.0v1</i> | Medtr5g029840.1 | Mt2R-MYB47 | EIGVKKGPWTPQEEDEKLIDYINKHGHGNGWTLKRAGLNRGKSCRLRWNTYLRPDIKRGKFTDEEERVIINLHSLVGNKWSIAAHLPGRTDNEIKNYWNTNIRKLL                                                                                                                                            |
| <i>Medicago truncatula 4.0v1</i> | Medtr5g038910.1 | Mt2R-MYB48 | ESKKKERHIVTWTQEEEDILRDQIGIHGTENWAIASKFKDKTTRQRRRWYTYLNSDFKKGWSPEEDMLLCEAQKIFGNRWTEIAKVVSGRTDNAVKNRSTLCKKRA                                                                                                                                            |
| <i>Medicago truncatula 4.0v1</i> | Medtr5g041570.1 | Mt2R-MYB49 | QSSKCARGHWRPAEDSKLKV ALYGPQWNWLIAEKLEGRSGKSCRLRWQNLDPNRRAFTEEEERLMAHRIYGNKWAMIARLPGRTDNAVKNHWHVIMARKY                                                                                                                                                 |
| <i>Medicago truncatula 4.0v1</i> | Medtr5g042030.1 | Mt2R-MYB50 | LGLKKGWTPKEDKLLIAYVTQHGRNWHSLPSRAVLRRCGKSCRLRWNYMIPDIKRGNFSSSEEDHNIQLHALGNKWSIAAALLPRRTDNEIKNHWNINIKRL                                                                                                                                                |
| <i>Medicago truncatula 4.0v1</i> | Medtr5g062790.1 | Mt2R-MYB51 | DTKKGTSKEEDELKAYVENHGTRNWNVEVSKNAGLIRCGKSCRLRWNYLHPDVKKGPFSEEEKTVFVYKYGEFKWSKLAELPGRSDNDIKNFVNARKRKL                                                                                                                                                  |
| <i>Medicago truncatula 4.0v1</i> | Medtr5g070020.1 | Mt2R-MYB52 | TSEILKQWNTNEEDRKLKLVKQYGERKWAQIAEKLEGRVQCRERWHNHLRDPDIKKSWSSEEEKILVATHAKIGNRWAEIAKKIPGRTEINAIKNHWNATKRRQNS                                                                                                                                            |
| <i>Medicago truncatula 4.0v1</i> | Medtr5g078140.1 | Mt2R-MYB53 | KVGLKKGPWTAEDDKLINFILTNQCCWRA VPKLAGLLRCGKSCRLRWNTYLRPDLKRGLLSEYEEKMVIDLHAQLGNRWSKIASHLPGRTDNEIKNHWNTHIKKKL                                                                                                                                           |
| <i>Medicago truncatula 4.0v1</i> | Medtr5g078800.1 | Mt2R-MYB54 | RGLRKGAWTYEEDNLLKDCIQYGEKWHLPKRAGLNRCKRSCRLRWNYLNPAINRESFSDHEIDMILRLHKLGNRWSLIAARLPGRANDVKNYWHTNLRKKVI                                                                                                                                                |
| <i>Medicago truncatula 4.0v1</i> | Medtr5g078860.1 | Mt2R-MYB55 | KARGLRKGAWTYEEDNLLKACIHKYGEKWHLPKRTGLNRCRCKSCRLRWNYLNPAINRESFAEIDEIDMILRLHKLGNKWSLIAARLPGRANDVKNYWHTNLRKKVI                                                                                                                                           |
| <i>Medicago truncatula 4.0v1</i> | Medtr5g078910.1 | Mt2R-MYB56 | RSRLKGAWTYEEDKLLKACIQYGEKWHLVSQRAGLNRCKRSCRLRWNYLNPAINRESFAEIDEIDMILRLHKLGNRWSLIAARLPGRANDVKNFVHTLRRKKV<br>NSRIKRTWTSEEDKLLKAYINKYGEKWHLPKRAELFIPFVAVCFVIGTSSLFTGLNRCRCKSCRLRWNYLNPAINRESFAEIDEIDMILRLHKLGNRWSLIAARLPGR<br>ANDVKNYWNTLHKNKDV          |
| <i>Medicago truncatula 4.0v1</i> | Medtr5g078930.1 | Mt2R-MYB57 | ANDVKNYWNTLHKNKDV                                                                                                                                                                                                                                     |
| <i>Medicago truncatula 4.0v1</i> | Medtr5g078950.1 | Mt2R-MYB58 | RAVKRGAWTYEEDKLLKACINKYGEKWHFVQRAGLSRCKRSCRLRWNYLSPNIKRESFAEIDEVDLILRLQKLLGNRWSLIAARLPGRANDVKNYWHTNLRKKL                                                                                                                                              |
| <i>Medicago truncatula 4.0v1</i> | Medtr5g079120.1 | Mt2R-MYB59 | NKRGLRKGAWTYEEDNLLKAYIHKYGEKWHLPKRTGLNRCRCKSCRLRWNYLNPAINRESFAEIDEADMIIRLHKLGNRWSLIAARLPGRANDVKNYWNTLHKKV                                                                                                                                             |
| <i>Medicago truncatula 4.0v1</i> | Medtr5g079220.1 | Mt2R-MYB60 | TRGVRKGAWTYEEDKLLKACMQYGEKWHLPQRAGLNRCKRSCRLRWNYLNPAINRESFAEIDEVDMILRLHKLGNRWSLIAARLPGRANDVKNYWHTLRRKKM                                                                                                                                               |
| <i>Medicago truncatula 4.0v1</i> | Medtr5g079290.1 | Mt2R-MYB61 | TRGVRKGAWTYEEDKLLKACIQYGEKWHLPQRAGLNRCKRSCRLRWNYLNPAINRESFAEIDEVDMLRLHKLGNRWSLIAARLPGRANDVKNYWHTLRRKKM                                                                                                                                                |
| <i>Medicago truncatula 4.0v1</i> | Medtr5g079670.1 | Mt2R-MYB62 | KENINKGAWSKQEDQLIDYIQVHGEWCWSIPKAAAGLHRCGKSCRLRWNYLRPDIKRGIFAQDEEDLIKHLALLGNRWALIAAGRLPGRTDNEIKNYWNSHIRKRL                                                                                                                                            |
| <i>Medicago truncatula 4.0v1</i> | Medtr5g082910.1 | Mt2R-MYB63 | ENGDKVKGWSKTEDETLVKLKENGARNWSVISNEIPGRSGKSCRLRWCNQLSPTVQHLFPFTAEDSIIEAHAVHGNKWATISRLPGRTDNAIKNHWNSTLRRRT                                                                                                                                              |
| <i>Medicago truncatula 4.0v1</i> | Medtr5g088080.1 | Mt2R-MYB64 | STDTKKGTWSKEEDELKAYVEKHGTRNWNVEVSKNAGLIRCGKSCRLRWNYLHPDVKKGPFSEEEKSKVFEFYIKYGEFKWSKLAHELPGRSNDIKNFVNARKRKL                                                                                                                                            |
| <i>Medicago truncatula 4.0v1</i> | Medtr5g088150.1 | Mt2R-MYB65 | STDTKKGTWSKEEDELKAYVEKHGTRNWNVEVSKNAGLIRCGKSCRLRWNYLHPDVKKGPFSEEEKSKVFEFYIKYGEFKWSKLAHELPGRSNDIKNFVNARKRKL                                                                                                                                            |
| <i>Medicago truncatula 4.0v1</i> | Medtr5g088610.1 | Mt2R-MYB66 | DTKKGKWSKEEDELKAYVEKHGTRNWNVEVSKNTGLAHFGRSCRFRWYNNLRPGVKKGPFSEEEKSKVFEFYIKYGEFKWSKLAHELPGRTDNDIKNFVNARKRKHKK                                                                                                                                          |
| <i>Medicago truncatula 4.0v1</i> | Medtr5g088640.1 | Mt2R-MYB67 | STDTKKGTWSKEEDELKAYVEKHGTRNWNVEVSKNAGLIRCGKSCRLRWNYLHPDVKKGPFSEEEKSKVFEFYIKYGEFKWSKLAHELPGRSNDIKNFVNARKRKL                                                                                                                                            |
| <i>Medicago truncatula 4.0v1</i> | Medtr6g009430.1 | Mt2R-MYB68 | KTNVKGRLWTPPEEDAKILAYVANHGIGNWTA VPKKAGLNRGKSCRLRWNTYLRPDLKHSFTPEEEELIITLHGAIGSRWSCIAKRLPGRTDNDVKNYWNTLHKKL                                                                                                                                           |



|                                  |                 |            |                                                                                                                                                                                                                                 |
|----------------------------------|-----------------|------------|---------------------------------------------------------------------------------------------------------------------------------------------------------------------------------------------------------------------------------|
| <i>Medicago truncatula 4.0v1</i> | Medtr6g012180.1 | Mt2R-MYB69 | KEGVKKGWPTPEEDIILVSYIQEHGPGNWKA VPTNTGLLRCSKSCRLRWNTYLRPGIKRGNFTDQEEKMIHLQALLGNRWAAIAAYLPQRTDNDIKNYWNTYLKKKL                                                                                                                    |
| <i>Medicago truncatula 4.0v1</i> | Medtr6g012690.1 | Mt2R-MYB70 | KVGLKKGWPTPEEDQKLLAYIDEHGHGWSRALPAKAGLQRCGKSCRLRWNTYLRPDIKRGKFSLQEEQTIQLHALLGNRWSAIATHLAKRTDNEIKNYWNTHLKKKL                                                                                                                     |
| <i>Medicago truncatula 4.0v1</i> | Medtr6g031120.1 | Mt2R-MYB71 | NKMGLKKGWPTSEEDVLFNFIKNGGHGWSRSLPKLAGLLRCGKSCRLRWNTYLRPDIKRGPFTEEEKLVQLHAILGNRWASIASQLPGRTDNEIKNLWNTHLKKKL                                                                                                                      |
| <i>Medicago truncatula 4.0v1</i> | Medtr6g055910.1 | Mt2R-MYB72 | KSKYRKGLWSPEEDNKLNSYIMKHGHGSCWSSVPIKAGLQRNGKSCRLRWNTYLRPGLKRGMLSKHEEDKIMTLHQMLGNKWSQIAAQLPGRTDNEIKNYWHSYLKKEV                                                                                                                   |
| <i>Medicago truncatula 4.0v1</i> | Medtr6g074860.1 | Mt2R-MYB73 | SRGHWPSPEDEKLRELVEYSGPHNWNIAENLRGRSGKSCRLRWFNQLDPRINRNPFTEEEERLITSHRIHGNRWAVIARHFPGRTDNAVKNHWHVMMARIR                                                                                                                           |
| <i>Medicago truncatula 4.0v1</i> | Medtr7g010210.1 | Mt2R-MYB74 | KEGVKKGWPTPEEDIILVSYIQEHGPGNWRAVPTKTGLSRCSKSCRLRWNTYLRPGIKRGNFTDQEEKMIHLQDLLGNRWAAIASYLPQRTDNDIKNYWNTHLKKKL                                                                                                                     |
| <i>Medicago truncatula 4.0v1</i> | Medtr7g011170.1 | Mt2R-MYB75 | KVGLKKGWPTSEEDQKLLSYIEEHGHGWSRSLPTKAGLERCGKSCRLRWNTYLRPDIKRGKFSVQEEQTIQLHAFLLGNRWSSIATRLPKRTDNEIKNYWNTHLKKKL                                                                                                                    |
| <i>Medicago truncatula 4.0v1</i> | Medtr7g017260.1 | Mt2R-MYB76 | NTIGVKKGAWTYEEDNLLKAYINKYGEKWHLPQRAGSGLNRCRCSKSCRLRWNTYLRPNINRKSFSSEDEVDMILRLHKLGNRWSLIAGRLPGRTRANSVKNYWNTHLKKV                                                                                                                 |
| <i>Medicago truncatula 4.0v1</i> | Medtr7g037130.1 | Mt2R-MYB77 | KDLNIIKQWTTDEDRILQLVDRFLRNWSKIAKYMNGRIGKQCRERWNNHLCLDIKKEAWTEEDKILVEAHKIVGNKWAEISRRLSGRTENSVKNHWNATKRCLKA                                                                                                                       |
| <i>Medicago truncatula 4.0v1</i> | Medtr7g037260.1 | Mt2R-MYB78 | KDLNIIKQWTTDEDRILQLVDRFLRKWSKIAKYMNGRIGKQCRERWNNHLCPDIKESWTEEDKILIEAHKIVGNKWAEIARRLPGRTRANSVKNHWNATKRQKA<br>MSDMKDRQRWAEEDALLRAYVKQYGPREWNLVSRMNTPLNRDAKSLERWKNYLKPGIKKGSLEEEQRLVISLQATHGNKWKIAAQPGRATKRLGKWWVEVFEKQQ<br>R      |
| <i>Medicago truncatula 4.0v1</i> | Medtr7g061550.1 | Mt2R-MYB79 | KKGLKKGWPTAEDEILANYIKKNGGHGWSRSLPKITGLLRCSKSCRLRWNTYLRPDIKRGPFTEEEKLVQLHAILGNRWAAIASQLPGRTDNEIKNFNTHLKKKL                                                                                                                       |
| <i>Medicago truncatula 4.0v1</i> | Medtr7g076740.1 | Mt2R-MYB80 | VKVGYSKLCRSHWRPIEDAKLKVLAEYGPQNWNLIAEHLEGRSGKSCRLRWFNQLDPRINKKTFSEEEERLLSAHKMYGNKWAIIARLPGRTDNAVKNHWHVIMARRH                                                                                                                    |
| <i>Medicago truncatula 4.0v1</i> | Medtr7g087130.1 | Mt2R-MYB82 | KVGIKKGWPTPEEDIILVSYIQEHGPGNWRTVPTNTGLSRCSKSCRLRWNTYLRPGIKRGNFTDHEEGMIHLQALLGNKWAIAASYPQRTDNDIKNYWNTHLKKKL                                                                                                                      |
| <i>Medicago truncatula 4.0v1</i> | Medtr7g087350.1 | Mt2R-MYB83 | KVGIKKGWPTPEEDIILVSYIQEHGPGNWRTVPTNTGLSRCSKSCRLRWNTYLRPGIKRGNFTDHEEGMIHLQALLGNKWAIAASYPQRTDNDIKNYWNTHLKKKL                                                                                                                      |
| <i>Medicago truncatula 4.0v1</i> | Medtr7g102110.1 | Mt2R-MYB84 | KANVKKGPWSPEEDAKLKEYIEKHGTGGNWTLPKKVGLTRCGKSCRLRWNTYLRPNIKHGEFSDSEDKIICLTFASIGSRWSIIASKLEGRTDNDVKNYWNTKLLKKI                                                                                                                    |
| <i>Medicago truncatula 4.0v1</i> | Medtr7g109320.1 | Mt2R-MYB85 | KVGLKKGWPTAEDEILTQYVKAANGEGSWRSLPKNAGLLRCGKSCRLRWNTYLRADLKRGNISSEESIIKMHASFGNRWSLIASHLPGRTDNEIKNYWNTSHLSRKV                                                                                                                     |
| <i>Medicago truncatula 4.0v1</i> | Medtr7g110830.1 | Mt2R-MYB86 | KQKLRKGLWSPEEDEKLLNHITKYGHGCWSSVPKAGLQRCGKSCRLRWNTYLRPDLKRGTFSEEEENLIIELHSLVGNRWASQIAAQLPGRTDNEIKNLWNSLKKKL                                                                                                                     |
| <i>Medicago truncatula 4.0v1</i> | Medtr7g111290.1 | Mt2R-MYB87 | KQKLRKGLWSPEEDEKLLNYITKHGHGCWSSVPKLAGLQRCGKSCRLRWNTYLRPDLKRGAFSEEEENLIIELHALLGNRWASQIAAQLPGRTDNEIKNLWNSLKKKL                                                                                                                    |
| <i>Medicago truncatula 4.0v1</i> | Medtr8g006470.1 | Mt2R-MYB88 | EHVRKGPWKTEDEVLHVVKKYGPDRWSSIRSKGLLQRTGKSCRLRWNTYLRPNLKNCKFTIEEERIVIELQEFGNKWAKIASYLPGRTDNDVKNFVSSRQKRLA                                                                                                                        |
| <i>Medicago truncatula 4.0v1</i> | Medtr8g020490.1 | Mt2R-MYB89 | KEVKNKGAWSREEDDILSKYVVIHGEKWKQVAQNAAGLKRCSQRWNTYLRPDIKRGHISTDEEDMIIRLHLLGNRWSLIARLPGRTDNEIKNYWNTNLSKKL                                                                                                                          |
| <i>Medicago truncatula 4.0v1</i> | Medtr8g060940.1 | Mt2R-MYB90 | GGVRKGAWTYKEDELLKACINTYGEKWNLPVQRSGLNRCRCSKSCRLRWNTYLRPNINRGRFSEDEEDLILRLHKLGNRWSLIAGRLPGRTRANSVKNYWNTNLSKKL                                                                                                                    |
| <i>Medicago truncatula 4.0v1</i> | Medtr8g086920.1 | Mt2R-MYB91 | KLGIKKGWPTPEEDIILVSYIQHGPNGWRSVPTNTGLMRCSCSCLRWNTYLRPDIKRGNFTDHEEKMIHLQALLGNRWAAIASYLPQRTDNDIKNYWNTHLKRRM                                                                                                                       |
| <i>Medicago truncatula 4.0v1</i> | Medtr8g095390.1 | Mt2R-MYB92 | KQHTNKGAWSKEDERLNYIKQQGEGCWRSPLKAAAGLARCSCSCLRWNTYLRPDLKRGNFTHEEDELIIISLHAMVGNKWSQIAQKLPGRTDNEIKNYWNTHIKRL<br>PIRRAKGGWTAEEDETLRNAVAAFKGGKHWKIAEFFADRSEVQCLHRWQKVLNPELVKGPWTQEEEDKIVELVAKYGPWKWSLIAKSLPGRIGKQCRERWHNHLNPDIKKDAW |
| <i>Medicago truncatula 4.0v1</i> | Medtr7g061330.1 | Mt3R-MYB1  | TLEELALMNAHRIHGNKWAEIAKVLPGRTDPAIKNHWNSSLKKKL<br>PIRRAKGGWTAEEDETLRNAVAAFKGGKHWKIAEFFADRSEVQCLHRWQKVLNPELVKGPWTQEEEDKIVELVAKYGPWKWSLIAKSLPGRIGKQCRERWHNHLNPDIKKDAW                                                              |
| <i>Medicago truncatula 4.0v1</i> | Medtr7g461410.1 | Mt3R-MYB2  | TLEELALMNAHRIHGNKWAEIAKVLPGRTDPAIKNHWNSSLKKKL<br>TRRSTKGWPTPEDETLRKA VQRFQGNKWKIAECFKDRTDVQCLHRWQKVLNPELVKGPWSKEEDDVMIELVNKYGPKKWSIAQHLPRIGKQCRERWHNHLNPAINKEA<br>WTQEEELALIRAHQIYGNKWAEELTKFLPGRTDPAIKNHWNSSVKKKL              |
| <i>Medicago truncatula 4.0v1</i> | Medtr1g026870.1 | Mt3R-MYB3  | TRRSTKGWPTPEEDNLRKA VERFQGNKWKIAECFKDRTDVQCLHRWQKVLNPELVKGPWSKEEDDVMIELVNKYGPKKWSIAQHLPRIGKQCRERWHNHLNPAINKEA<br>WTQEEELALIRAHQIYGNRWAEELTKFLPGRTDPAIKNHWNSSVKKKL                                                               |
| <i>Medicago truncatula 4.0v1</i> | Medtr3g110028.1 | Mt3R-MYB4  | QEEELALIRAHQIYGNRWAEELTKFLPGRTDPAIKNHWNSSVKKKL<br>QISSKNGIWTTEEDNLLIEIVKMHGSIWKSIGGCAA YFPGRTDIECFHRWQKVSNDLVRKSWTKEEDEALIELVRKYGFKRWSFIAKSMGRIGKQCRERWHNLDVVIKGA                                                               |
| <i>Medicago truncatula 4.0v1</i> | Medtr5g010650.1 | Mt3R-MYB5  | WTEEEESILAHYYQIYGSKWSEIARVLPGRSDPAIKNHWNSSMKKKS                                                                                                                                                                                 |





**Supplementary Table S4. The assessment of conserved motifs in each subfamily.**

| Motif | E-value    | Width | Sequence                                                                                                                                                      |
|-------|------------|-------|---------------------------------------------------------------------------------------------------------------------------------------------------------------|
| 1     | 1.50E-1922 | 15    | [SQ][MR]GIDPVTH[KR]PLSEx                                                                                                                                      |
| 2     | 2.10E-112  | 21    | SPxSPxSSSSExSSSSSxxx                                                                                                                                          |
| 3     | 1.80E-179  | 21    | S[SE][ED]x[F][PA][EQ]ID[EDG][SN]FW[ST][ED][TPV][LF][SL][AM][DE]N                                                                                              |
| 4     | 1.40E-183  | 15    | DD[DG]M[DE]FW[LY][ND][LV][FL][MI][KQ][SA]G                                                                                                                    |
| 5     | 3.40E-30   | 15    | [IP][PE][IFL][DE][IS][DG]P[DE][FIL]WS[IM][IL]D[GS]                                                                                                            |
| 6     | 8.90E-81   | 23    | [EG][EA][ED][EG]K[EQ][WK]WLE[YD]LENELGL[WE]GTx[DE]                                                                                                            |
| 7     | 9.50E-283  | 28    | [TP]xSxD[KN][AS]P[TA]D[YI]FL[RK][IL]WNSE[VAI]G[EDK][SA]FRKE[NS]                                                                                               |
| 8     | 1.40E-408  | 29    | A[SLC][PA][LSA][TA]RH[MK]AQWE[SNT]ARLEAEARLS[RL][EL]SLL[MF]                                                                                                   |
| 9     | 6.20E-155  | 40    | EDV[ML]AGSD[ST]SSSN[ED]LEDSS[DE][ST][AS]LQLLDFP[GS][NG]NDMSFL[EG][GH]                                                                                         |
| 10    | 5.90E-57   | 25    | C[CIN]VKTPEVLS[FC][AP]D[MI]TM[GD]QTE[HD]K[AV][PA]                                                                                                             |
| 11    | 2.90E-34   | 20    | [DN]NNN[NS][TI][GN][CS][MI][IQ][ST]EL[SR]TSF[QL]QQ                                                                                                            |
| 12    | 4.70E-50   | 74    | PLS[SL]QILCN[ST]DARAPSAWEICDP[IV]YV[LS]PE[LF]SED[ILV]ISSS[YN][NK][MV]C[TR][SI]T[IKR]D[YD]Q[ST]TS[TS]DS[TI]LD[VM]LHSD[CS][IR][DV][SP][LA][EI][LS][EH][ID]D[HN] |
| 13    | 8.00E-43   | 13    | SR[KQR][HY][TS][FY]RR[KP][SY][TN][EA]                                                                                                                         |
| 14    | 1.60E-44   | 21    | KLPG[AG]xKR[RK]GGRTS[RG]S[AS]MKKN                                                                                                                             |
| 15    | 4.40E-313  | 12    | PDLNL[DE]L[SC][I][SG][LP]P                                                                                                                                    |
| 16    | 4.80E-234  | 15    | [KQ]NxV[IF]K[PT][KR][PA]V[RK]F[TS]TA                                                                                                                          |
| 17    | 2.40E-104  | 11    | L[SR]KK[LV]xSxExK                                                                                                                                             |
| 18    | 2.00E-151  | 29    | [NS]FN[VG][DN][ED]FFDFSNE[GD][PS][LC][NG]LEW[MV][SN][KR]FLE[LI]DE                                                                                             |
| 19    | 2.10E-44   | 21    | P[NT]DN[MT]L[ED]K[LVI][YF]EEY[LQ]QLL[KNS]EDD                                                                                                                  |
| 20    | 1.70E-90   | 15    | [NG][DE]D[TV]FSSFL[DN]SLIN[ED]                                                                                                                                |
| 21    | 1.20E-97   | 21    | [ND][HVI][EKV][EV][TE][TI][ND][ST]SKSW[CS][DQ]LL[LV][NE]D[SC][IM]                                                                                             |
| 22    | 9.00E-64   | 21    | R[HQ]SE[MI]VRPN[GR]C[NS][GN]YG[CS]S[ND][CH][AS][SF]                                                                                                           |
| 23    | 1.60E-46   | 21    | T[EH]DDSER[IT]AFGMA[DN][VI]N[LF][VL]E[TA]E                                                                                                                    |
| 24    | 1.60E-111  | 21    | N[SC]T[SC]SM[SW][SN]L[AE]D[QE][QER]SPHSD[HY]FA                                                                                                                |
| 25    | 3.50E-118  | 25    | L[AD]ESL[LF][DY]LNELSSPDCNLLSSPSD[CF]                                                                                                                         |
| 26    | 7.40E-53   | 64    | [KQ]I[AV]VNIE[TN]N[VI][TN]DAQSFDEQ[SL][RK]TLL[QE]ED[LS]TME[IK]CS[HR][PH]H[PN]NMTSL[MI]LEDEEL[IF]FK[QH]NGITSEGL[GV]                                            |
| 27    | 3.80E-98   | 28    | FE[DV]MCSDDQSNMQRVNS[FL]T[VF][AP]DDQG[MI]EE[FL]                                                                                                               |
| 28    | 1.30E-42   | 15    | TDFG[LS]EE[FL]Y[RGM][GE][PAL]ATL                                                                                                                              |
| 29    | 2.60E-291  | 15    | xDxLWD[NG]LW[NS][LM][DE]DIW                                                                                                                                   |
| 30    | 2.70E-146  | 41    | KKAK[SLN][SP][TQS]D[NQ][AS][ED]KA[KR][NRT][RQ][LY]L[KR]RQQF[QH]QQQQQ[QL][QL]QQQQQQQQ                                                                          |
| 31    | 2.80E-80   | 17    | [ST]P[SE][SN]SS[ST][SAT]SSSSSSSD                                                                                                                              |
| 32    | 4.00E-913  | 21    | K[HQ]A[KR]QL[KN][CI]D[VA]NSKQF[KR]D[TA][MV]RY                                                                                                                 |
| 33    | 6.00E-444  | 21    | LWMPRL[LVI][EQ][RK][I][QE]A[AS][SA][AS]SSSxxx                                                                                                                 |
| 34    | 1.70E-42   | 15    | [DN]NRVHFERST[GR]S[YD]CL                                                                                                                                      |
| 35    | 1.10E-192  | 57    | [SP][DE]LD[SGI][AE]EP[SL][TS]SFP[TGR][QK]N[TS]E[ED][IA][AE]VQ[TAI][NI][KT]T[IPQ][YC]LQ[DE]DIS[SP]Q[VA]IPI[SH]E[GV]N[YD][EDG][YN][VG]LQ[GR]EI[QHR][HGS][GPS]   |
| 36    | 2.30E-35   | 21    | N[DE]DGQP[GS][AE][AT][LS]Q[EQ][HD][LF][EK][GD][SL]D[NK][QL][FV]                                                                                               |
| 37    | 1.70E-47   | 21    | Y[NI]F[SP]V[GR]SL[AS][TNS][LD]L[SLY]S[SE][EF][FY][ACF][DA]D[GA]                                                                                               |
| 38    | 1.30E-59   | 21    | I[PLT]PS[SF]SYM[VIL]ASPEAFS[DE][SN]E[ST][YH]                                                                                                                  |
| 39    | 1.10E-807  | 29    | K[NV][AS][AS]NLSHMAQWESARLEAEARL[VA]RES[KS]L                                                                                                                  |
| 40    | 1.40E-141  | 20    | [PR]P[PR]CLD[VI]LKAWQ[GM]VW[TS][KS]Lx[ST]                                                                                                                     |
| 41    | 3.50E-97   | 20    | G[AG][DS]xDDLESPTSTL[SN]FSENA                                                                                                                                 |
| 42    | 2.30E-35   | 11    | V[ND][SA]SP[SIT][DG]S[PS][MV]F                                                                                                                                |
| 43    | 1.40E-42   | 20    | [GA][NG][IAF][EIG][EA]GFT[GEN]LLL[GS][NG]SLDR[DN][LP]                                                                                                         |
| 44    | 3.00E-231  | 15    | xT[ED][ED][ED]N[KD][SN]Y[WC][NS][NDS][IL]L[NK]                                                                                                                |
| 45    | 2.10E-279  | 29    | M[EN]HH[PS][WLP][DE][ED][HN]A[LV][RK]LQA[ED]A[AT]QLAK[LI]Q[YL]LQ[NY]L                                                                                         |
| 46    | 2.50E-213  | 21    | RPRTD[IF][FL][AS][SA]LP[QH]L[IL]A[LA]ANL[RK]E                                                                                                                 |
| 47    | 5.50E-199  | 21    | [SA]PRLDLLDLSS[IL]L[NS]SSLYNSS                                                                                                                                |
| 48    | 6.40E-145  | 17    | Q[PA]L[VL]NP[ED][LIV]L[RK]LAT[ST]LLS                                                                                                                          |
| 49    | 2.00E-142  | 21    | ASVLSTPSSSPTPLNS[NS]S[TS][YT][IY]                                                                                                                             |
| 50    | 2.00E-48   | 11    | IP[ED][IS]LD[VI][ND][DE]F[ML]                                                                                                                                 |
| 51    | 1.40E-735  | 32    | [SP][KR]GQWERRLQTDI[HN][MT]A[KR][QK]AL[CR][ED]ALS[LP][DE]K[PS][SP][SP]S                                                                                       |

|     |            |    |                                                                                                                                                                                                |
|-----|------------|----|------------------------------------------------------------------------------------------------------------------------------------------------------------------------------------------------|
| 52  | 5.30E-618  | 29 | [PS]S[SQ][SA][ST][TS]YASS[TA][ED]NI[SA][RK]LL[EQ]GWM[RK][SN]SPKSS                                                                                                                              |
| 53  | 6.00E-359  | 21 | xQ[PV]P[LF][ST][LM][LI]E[KS]WL[LF][DE][ED][AG][GA][GA]QxE                                                                                                                                      |
| 54  | 6.30E-36   | 36 | [GE]T[MIL][AG][QLN]S[SGT][GS][GAT][GINV]N[QS][ADIV][AS][EV]E[AE]A[RQ]RCFRD[NST][LI][VL][SN]KAVRECG[KR]                                                                                         |
| 55  | 1.30E-38   | 37 | N[VAL]N[HIMV][AT][SG][FVY][NH]SP[LF]A[GS][AT][PT][AT][GA][LMV]RL[HY]E[CY][EP]VP[ST]PRMVW[DN][FM]QE                                                                                             |
| 56  | 1.80E-219  | 33 | T[TS]LA[PL]PQ[VG][AG]HLAEAAALGCFKD[ED]MLHLLT[KR]KR[IP]D                                                                                                                                        |
| 57  | 2.20E-52   | 15 | D[DAN]T[IV][EQ][KR]IK[LY][GS]LSRA[IM]                                                                                                                                                          |
| 58  | 1.70E-64   | 26 | SS[SA]ASSFV[DE][AT]ILD[RK][DE][SK]E[MI][FL][LS][DQ]FP[EP]LL                                                                                                                                    |
| 59  | 1.20E-515  | 25 | FS[PA]E[FL][LM][AS]VM[QR]EMI[RA]KEVRNYM[SA][GS][LV][EG]                                                                                                                                        |
| 60  | 1.30E-249  | 21 | [ES]SSSSEPDP[PL]TSLSLSLPGS[DG]                                                                                                                                                                 |
| 61  | 9.10E-133  | 15 | M[SN]PGSPSGSD[VSL]SDSS                                                                                                                                                                         |
| 62  | 2.50E-216  | 41 | SLLGPEFV[DE][YF]EE[PH]PPFSSHELA[AS][IL]AT[DE][IL][SN][NS][IV]AW[IL]KSGLE[NS]S                                                                                                                  |
| 63  | 1.10E-182  | 15 | Q[VL][FY]RPV[AP]RT[GS][AG][FV]S[PV]Y                                                                                                                                                           |
| 64  | 9.40E-91   | 18 | C[GS]E[PR][EQ]VPS[KR]CGHGCCGN[QP]                                                                                                                                                              |
| 65  | 2.30E-466  | 13 | RQ[KR]GIDP[AN]THKPL                                                                                                                                                                            |
| 66  | 2.00E-107  | 15 | x[ED][ED][IL]KW[SP][ED]YL[HNQ][TG][PT][FL][LF]                                                                                                                                                 |
| 67  | 1.30E-120  | 33 | [PGS][SA][SF]S[SN][NS][ST][GSN]S[SRN][GNS][GS][SN]S[SMT][SG][FIT]E[LP]QS[NT][ST]S[FIL][FL]E[NS][SN][VAI]F[SP]W                                                                                 |
| 68  | 7.00E-117  | 21 | QL[LQ]QT[PSA]D[IM]YDKDLQR[MIL][AS][ALV][SA]F[GE]                                                                                                                                               |
| 69  | 1.60E-180  | 21 | GEWDL[E]G[L][ML][KE][DN]VSS[FL]PFLDFQ                                                                                                                                                          |
| 70  | 1.40E-41   | 15 | [LMI]M[TS][ML][CY]MDS[SSS][ST]SS                                                                                                                                                               |
| 71  | 4.10E-65   | 15 | LPK[VL][LM]F[AS][ED]WL[SD][LMS][DS]YF                                                                                                                                                          |
| 72  | 1.80E-421  | 15 | AR[KR]YRE[QR]S[SR][AL]Y[RG][RK]RK                                                                                                                                                              |
| 73  | 4.00E-398  | 15 | xKKx[VP]PFIDFLGVGA                                                                                                                                                                             |
| 74  | 9.30E-210  | 21 | PP[QR]S[ST][LI]L[QE][NDE]YI[KR]SL[NT]LxSxST                                                                                                                                                    |
| 75  | 8.20E-157  | 21 | [ED][VM]D[QS]LMGx[ES]V[KN]KEMDL[MI]EM[IV]S                                                                                                                                                     |
| 76  | 1.20E-106  | 11 | RRQ[FN]S[RK]R[KR]CRK                                                                                                                                                                           |
| 77  | 1.10E-318  | 14 | RQRAGLP[LI]YPP[ED][VI]Q                                                                                                                                                                        |
| 78  | 6.30E-198  | 21 | [CS]LSPRNSGLL[DE][AD]LL[HY]E[AS]Q[TA][LM]S                                                                                                                                                     |
| 79  | 1.10E-144  | 29 | N[PS][AVC]TPD[ST][FL][FI]D[DE][FL]P[TP]DMFD[HSY][IL]EP[LF]PS[PS]S[ES]W                                                                                                                         |
| 80  | 3.30E-122  | 15 | [AS]VKLELPSLQYSE[TS][SD]                                                                                                                                                                       |
| 81  | 1.90E-135  | 21 | [PQ][IL][DEK][EF][GR]KY[DP][HS][LF][ED][TE][FI][AN]EK[LY][VL][KQD][EV]                                                                                                                         |
| 82  | 4.20E-59   | 11 | SCxWNN[ML]P[GP][IV]C                                                                                                                                                                           |
| 83  | 8.70E-78   | 37 | Q[IL]PQP[QT][PL]DL[PV][FL][SL]PES[QH][ED]L[LV]ARL[DG]D[PS][YN][FL][LFM][DN][VM][FL]G[THP][AIQ][DE][AT][PS]                                                                                     |
| 84  | 1.60E-64   | 29 | S[SN][SN][ST][ST][PT][SV][RS][PST][PS]SPSV[TS]LSLSPSTVA[AP]AP[PS][AI]                                                                                                                          |
| 85  | 5.70E-43   | 23 | C[SQ][SL]SYL[ED]N[PS][ED]QV[I][KR]M[VM]PLP[DEP][LM][VM][NK][PS]                                                                                                                                |
| 86  | 1.10E-712  | 87 | [AV][AQ]HKKEA[AT]WRL[RKS]R[VL]E[LQ]QLESEK[AS][CR][RK]RREKMEEIE[AS]K[IMV][RK][AC]LREE[QE][KA]A[AFT]L[DE][RK][IV]E[AS][ED]YREQL[AS][GA]L[AS]KH[LAV][RK]L[TA]KRRDAE[AS]KE[QA]KL[AM][ED][QA]W[ATS] |
| 87  | 3.30E-86   | 29 | ENS[NTS]S[CY][IS]N[LS]NNKR[IAV][LI][FL]P[DN]G[FI][NS]T[DP]G[TA][APS]E[SA]A                                                                                                                     |
| 88  | 4.60E-108  | 29 | [DHL][GRV]D[CD][GC][TP][TN][AN]NQ[QL][LP]R[HP]PFAVL[AV]QN[FLV][HN][NS][VL][NK][ES][LT]                                                                                                         |
| 89  | 5.40E-298  | 52 | FLKKDDPK[IV]TALMQAELLSSLA[LQ]KVN[AT][ED]NT[DN]QS[LM]ENAWKVLQDFLN[QKR][ST]KE[NS]                                                                                                                |
| 90  | 1.20E-270  | 44 | [TC]EF[ST]SPL[QH]VTPLFRSLA[AD][GA]IP[ST]PKFSESER[NQ]FLLK[TV]LG[VM]ES[PT]SP                                                                                                                     |
| 91  | 3.50E-2377 | 66 | DDPR[KR]L[RK]PGEIDPNPE[ST]KPARPDPVMDDEDEKEMLSEARARLANT[RQ]GKKAKRKAREKQLEEARLA                                                                                                                  |
| 92  | 8.40E-396  | 21 | [SA]LQKRREL[KR]AAGI[DE][VS]RQ[RK][KR][RK]K                                                                                                                                                     |
| 93  | 8.60E-619  | 25 | [IV]DYNAEIPFEK[KR]PP[PA]GF[YF]D[TV][SA][DE]E[ED]R                                                                                                                                              |
| 94  | 5.40E-529  | 41 | FPTTIELEG[KR]RRVDIE[AE]Q[LE]RK[QK]D[IVA][AK][RK][NQ]KIA[QE]RQDAPSA[IV][LM]                                                                                                                     |
| 95  | 5.00E-573  | 29 | PEAVRKRSKL[MV]LPAPQ[IV]SD[HA]ELE[EQ]I[AV]K[ML]G                                                                                                                                                |
| 96  | 1.30E-336  | 25 | DAI[ML]MEA[EQ]NLA[RA]L[RT][EN][ST]QTPLGG[ED]N                                                                                                                                                  |
| 97  | 1.30E-326  | 21 | LHPSDFSGVTP[KR]KR[EV][IV][QA]TPNP                                                                                                                                                              |
| 98  | 2.70E-264  | 17 | LR[AS]GLA[SG]LP[AQ]PKN[ED][YF][EQ]I                                                                                                                                                            |
| 99  | 4.30E-287  | 28 | EQA[DE]E[LM][IV][RK]KE[LM][LV]A[LM]LEHD[NA]AKYP[LV]x[DE]KS                                                                                                                                     |
| 100 | 8.50E-686  | 67 | D[AE]CL[DN][DQ][LV][ML]Y[FL]P[ST][RQ][NQ][RA]Y[GET][RL][AS][SA][VL]A[SG][NK][KAM][DE][RK][LI][AE][AS]L[QK]NE[FL]EN[VN][RK]K[HK]M[ED]R[ED][AT][KR]KA[AL][KR]LE[KQ]K[LI]K[VIL]L[TL]GGYQ[TR]RA    |
| 101 | 3.10E-287  | 36 | K[QE][LM][ED][TQ]A[GA][TI]ELE[CT]F[REK]ALH[EK]QE[QL]LA[AI][PS]xR[IL]EALQEEVQ                                                                                                                   |
| 102 | 3.40E-75   | 15 | QKE[RL]E[RK]ELQKRY[GK][AD]L                                                                                                                                                                    |

**Supplementary Table S5. The query sequences used in the identifications of MYB proteins in each species.**

| Genome ID NO. | Gene Name | Subfamily | Protein sequence of the MYB domain                                                                                                                      |
|---------------|-----------|-----------|---------------------------------------------------------------------------------------------------------------------------------------------------------|
| At3g28910     | AtMYB030  | S1        | KGGVKKGPWTPPEEDIILVTYIQEHGPGNWRAVPTNTGLLRCSKSCRLRWYNYLRPGIKRGNFTEHEEKMIVHLQALLGNRWAAIASYLPQRTDNDIKNYWNTHLKKKL                                           |
| At3g23250     | AtMYB015  | S2        | KMGLKRGWTPPEEDQILVSFILNHGHSNWRALPKQAGLLRCGKSCRLRWYNYLRPGIKRGNFTKEEEDAIISLHQILGNRWSAIAAKLPGRDNEIKNVWHTHLKRRK                                             |
| At3g12820     | AtMYB010  | S3        | KSQVKGWTPWDEESERLRSFILKNGHQNWRSPLKLAGLMRCGKSCRLRWYNYLRPGLKRGNFTEEEEDTIIHLHQAYGNKWSKIASNFPGRDNEIKNVWNTHLKRRK                                             |
| At4g38620     | AtMYB004  | S4        | KAHTNKGAWTKEEDERLVAIYKAHGEWCWRSPLKAAAGLLRCGKSCRLRWYNYLRPDLKRGNFTEEEDELIILKLSLLGNKWSLIAGRLPGRDNEIKNYWNTHIRRKL                                            |
| At5g35550     | AtMYB123  | S5        | REELNRGAWTDHEDKILRDYITTHGEGKWSLTPNQAGLRKRCGKSCRLRWYNYLRPGIKRGNISDEEELIIRLHNLGNRWSLIAGRLPGRDNEIKNHWSNLRKRL                                               |
| At1g66380     | AtMYB114  | S6        | SKGLRKGAWTAEEDSLLRQCIGKYGEGKWHQVPLRAGLNRCRKCRLRWYNYLRPKSIKRGKFSSEVDDLRLHKLGNRWSLIAGRLPGRDANDVKNYWNTHLKSKKH                                              |
| At5g49330     | AtMYB111  | S7        | KIGLKRGRWTAEEDEILTKYIQTNGEGSWRSLPKKAGLLRCGKSCRLRWYNYLRDLKRGNITSDEEELIIVKLHSLGNRWSLIATHLPGRDNEIKNYWNSHLSRKI                                              |
| At1g66230     | AtMYB020  | S8        | KVGLKKGWTAEEEDRKLINFILNNGQCCWRAVPLKSLGRCGKSCRLRWYNYLRPDLKRGLLSDYEEKMVIDLHSQLGNRWSKIASHLPGRDNEIKNHWNTHIKTKL                                              |
| At5g15310     | AtMYB016  | S9        | KLGLKKGWTPPEEDQKLLAYIEEHGHSWRSLPEKAGLRHRCGKSCRLRWYNYLRPDIKRGKFNLEEQEQTIIQLHALLGNRWSAIAATHLPKRTDNEIKNYWNTHLKRRK                                          |
| At5g16770     | AtMYB009  | S10       | ENGLKKGWTPQEEEDKLIDHIQKHGHSWRALPKQAGLNRCGKSCRLRWYNYLRPDIKRGNFTEEEEQTIINLHSLGNKWSIAGNLPGRDNEIKNYWNTHLRKKL                                                |
| At4g05100     | AtMYB074  | S11       | KNGLKKGWTPPEEDQKLIDYINIHGYGNWRTLPKNAGLRQCGKSCRLRWYNYLRPDIKRGFRSFEETIQLHSMGNKWSAIAARLPGRDNEIKNYWNTHIRKRL                                                 |
| At5g61420     | AtMYB028  | S12       | GEGLKKGAWTTEEDKLLISYIHDHGEGRWDIPQKAGLRKRCGKSCRLRWYNYLRKPEIKRGESSEEQIIIMLHASRGNKWSVIARHLPRRTDNEIKNYWNTHLKRRK                                             |
| At1g57560     | AtMYB050  | S13       | KQKLRKGLWSPPEEDKLLNYITKHGHCWSSVPLAGLERCGKSCRLRWYNYLRPDLKRGAFSSEEQNLIVELHVLGNRWSQIARLPGRDNEIKNLWNSCIKKKL                                                 |
| At2g36890     | AtMYB038  | S14       | KANVKGWTPWPEEDAKLDYIEKQGTGGNWIALPHKAGLRRCGKSCRLRWYNYLRPNIRHGDFTTEEDNIISLFSASIGSRWSVIAAHLQGRDNDIKNYWNTKLRKKL                                             |
| At3g27920     | AtMYB000  | S15       | NQYKKGWTPVEEDNLDYVNLHGTGQWNRIVRKTGLKRCGKSCRLRWYNYLRPNVKNKGNFTEEQEEDLIIRLHKLGNRWSLIAKRVPGRDNDVKNYWNTHLKSKKL                                              |
| At3g48920     | AtMYB045  | S16       | KEKQRKGLWSPPEEDKLRSHVLKYGHGCWSTIPLQAGLRNGKSCRLRWYNYLRPGLKKSFTKQEEETILLSLHSMGNKWSQISKFLPGRDNEIKNYWNSLKKGV                                                |
| At3g24310     | AtMYB071  | S17       | EEGWRKGPWTAEEEDRLIDYVQLHGEGRWNSVARLAGLRNGKSCRLRWYNYLRPDLKRGQITPHEETIILELHAKWGNRWSIARSLPGRDNEIKNYWNTHFKKKT                                               |
| At5g06100     | AtMYB033  | S18       | GHALKKGPWSSAEDDILIDYVKNHGEGNWNAVQKHTSLFRCGKSCRLRWANHLRPNLKKGAFSQQEELIVELHAKMGNRWARMHAHLPGRDNEIKNYWNTIRKRRQ                                              |
| At5g40350     | AtMYB024  | S19       | DAEVRKGPWTEEDLILINIANHGEVWNSLAKSAGLRKRTGKSCRLRWYNYLRPDVRRGNITPEEQTIMELHAKWGNRWSKIAKHLPGRDNEIKNFWRTKIQKYI                                                |
| At1g48000     | AtMYB112  | S20       | EIEIRRGWTPVEEDMKLVSYSILHGEGRWNSLSRSAGLNRTGKSCRLRWYNYLRPDIRRGDISLQEQFIILELHRSWGNRWSKIAQHLPGRDNEIKNYWNTRVQKHA                                             |
| At4g33450     | AtMYB069  | S21       | KPSCQRGHWRPVEDDNLRLVEQYGPKNWFIAQHLYGRSGKSCRLRWYNYLRQDPNITKPFTEEEERLLKAHRIQGNRWASIAARLPGRDNDVKNHFMVIMARRK                                                |
| At3g50060     | AtMYB077  | S22       | MADRKGPWSPQEEDEQLRRMVEKYGPRNWSAISKSIPGRSGKSCRLRWYNYLRQDPEVEHRRPSPPEEDITVTARAQFGNKWATIAARLLNGRTDNDVKNHWNSTLKRKC                                          |
| At3g55730     | AtMYB109  | S23       | IRSKVKGWTPSTEEDAVLTKLVRKLGPRNWSLIARIPGRSGKSCRLRWYNYLRQDPLKRPFSDEEDRMIISAHAVHGKWAIVAKLLTGRDNDVKNHWNSTLRRKY                                               |
| At1g34670     | AtMYB093  | S24       | ENGLKKGWTPPEEDQKLIDYIHKHGHGHSWRALPKLADLNRCGKSCRLRWYNYLRPDIKRGKFSAEETIILHLSILGNKWSAIAATHLQGRDNEIKNFWNTHLKRRK                                             |
| At5g58850     | AtMYB119  | S25       | SKNLIKQWTAEEEDRKLRLVRQHGERKWAMISEKLEGRAGKQCRERWHNHLRDPDIKDGWSEEEERVLVESHMRIGNKWAEIAKLPGRDNEIKNFWRTRVQKHA                                                |
| At5g52600     | AtMYB082  | orphan    | KSYVKGWTPVEEDMILKSYVETHGEGNWADISRRSGLKRGKSCRLRWYNYLRPNIKRGSMSPEEQDLIIRMHKLLGNRWSLIAGRLPGRDNEIKNYWNTHLNKKP                                               |
| At3g13540     | AtMYB005  | orphan    | KMGKRGWTPVEEDELVSFIKKEGEGWRSLPKRAGLLRCGKSCRLRWYNYLRPSVKGKGGITSDEEDLILRLHLLGNRWSLIAGRIPGRDNEIKNYWNTHLRKKL                                                |
| At1g18710     | AtMYB047  | orphan    | VDGMKKGWTAEEEDQKLGAYINEHGVCWRSPLKRAQLRQCGKSCRLRWYNYLRPDIKRGKFTPEEEETIQLHVLGNRWAAMAKKMQNRDNDIKNHWNSTLKRKC                                                |
| At3g61250     | AtMYB017  | orphan    | KIGLKKGWTPPEEDEVLAHIKKNHGHGHSWRALPKLAGLLRCGKSCRLRWYNYLRPDIKRGKFTPEEELIIVLHAILGNRWAIAAQLPGRDNEIKNLWNTHLKRRK                                              |
| At4g17780     | AtMYB039  | orphan    | DKGVKKGWTPPEEDKLTAYINENGYGNWRSPLKLAGLNRCGKSCRLRWYNYLRPDIRRGKFSDEESTIVRLHALLGNKWSKIAHLPGRDNEIKNYWNTHMRKKL                                                |
| At3g28470     | AtMYB035  | orphan    | KSNVKKGLWTEEEDAKILAYVAIHGVCWRSPLKRAQLRQCGKSCRLRWYNYLRPDLKHSFSTQEEELIECHRAIGSRWSSIARKLPGRDNDVKNHWNSTLKRKC                                                |
| At5g56110     | AtMYB080  | orphan    | KENVKRGWTPPEEDNKLASYIAQHGRNWRSLPKNAGLRQCGKSCRLRWYNYLRPDLKHGQFSEAEHIIKVFHSLVGNRWSLIAAQLPGRDNDVKNYWNTKLRKKL                                               |
| At3g53200     | AtMYB027  | orphan    | EETLRRGPWLEEDERLVKVISLLGERRWDSLAIVSGLRKSGKSCRLRWYNYLRNPTLKRGPMSQEEERIIIFQLHALWGNKWSKIARRLPGRDNEIKNYWRTHYRKKQ                                            |
| At3g12720     | AtMYB067  | orphan    | KHKVKGWTPPEEDELRLYITTHGHPWSSVPLAGLRQCGKSCRLRWYNYLRPDLRRGFSFNEEQIIIDVHRILGNKWAQIAKHLPGRDNEIKNFWNSTLKRKC                                                  |
| At1g63910     | AtMYB103  | orphan    | QQKVKRGLWSPPEEDKLRIRYITTHGYGCWSEVPEKAGLRQCGKSCRLRWYNYLRPDIRRGKFSPEEELIISLHGVVGNRWAHIAHLPGRDNEIKNYWNSWIKKKI                                              |
| At3g08500     | AtMYB083  | orphan    | KPKLRKGLWSPDEDEKLIRYMLTNGQGCWSDIARNAGLLRCGKSCRLRWYNYLRPDLKRGFSFPEEELIIFHLHSLGNRWSQIATRLPGRDNEIKNFWNSTLKRKC                                              |
| At1g14350     | AtMYB124  | orphan    | KKERHIVTWSQEEEDVILREQITLHGTEWAIASKFKDKSTRQCRRRWYTYLNSDFKRGGSPEEDMMLCEAQRVFGNRWTEIAKVVSGRDNDVKNRFTTLCKKRA                                                |
| AT1G09770     | AtCDC5    | orphan    | MRIMIKGGVWKNTEDEILKAAMVYKGNQWARISLLVRKSAKQCKARWYEWLDPSTIKTEWTRREEDEKLLHLAKLLPTQWRTIAPVGRTPSQCLERYEKLLDAAC                                               |
| AT4G32730     | At3R-MYB1 | 3R-MYB    | ARRSTKGGWTPPEEDEVLCKAVERFQGNWKKIAEFCFDRDQVCLHRWQKVLNPELVKGPWSKEEDNTIIDLVEKYGPKKWTSTISQHLPRIGKQCRERWHNHLNPGINKNAWTQEEELTLIRAHQIYGNKWAELMKFLPGRSDNSIKNHWN |
| AT4G00540     | At3R-MYB2 | 4R-MYB    | TRRSTKGGWTAEEEDQILTNVVKKYQGRNWKRIAECLPGSEENRRNDVQCQHRWLKVLDPQLKGAWKKEEDELSELVKDYMEMDRPPWSKISKELPGRIGKQCRERWHNHLNPTIHKSPWTREEELILVQAQRGNKWAIAKLLPGRTE    |
| AT3G09370     | At3R-MYB3 | 5R-MYB    | PIRRAKGGWTPPEEDELRLQAVDTFKGKSWKNIAKSPDRTEVQCLHRWQKVLNPDLIKGPWTHEEDELKIVELVEKYGPAKWSIAQSLPGRIGKQCRERWHNHLNPDINKDAWTEEEVALMNAHRSHGNKWAIAKVLPRDNDVKNHWN    |
| AT5G11510     | At3R-MYB4 | 6R-MYB    | ARRSTRGQWTAEEDEILRKAHVSFKGNWKKIAEYFKDRDQVCLHRWQKVLNPELVKGPWTKKEEDEMIVQLIEKYGPKKWTSTIARFLPGRIGKQCRERWHNHLNPAINKEAWTQEEELLIRAHQIYGNRWAELTKFLPGRSDNGIKNHWN |
| AT5G02320     | At3R-MYB5 | 7R-MYB    | PMRRAKGGWTPPEEDELRRAVEKYKGRWKKIAEFFPERTEVQCLHRWQKVLNPELVKGPWTKKEEDEMIVVKYGPAAKWSVIAKSLPGRIGKQCRERWHNHLNPGIRKDAWTEVEESALMNSHRMYGNKWAIAKVLPRDNDVKNHWN     |
